# Supplementary material for: Synthesis of S -alkyl phosphorothioates/phosphorodithioates via ring-opening reaction of sulfonium salts with S 8 , H -phosphonates or P 4 S 10 , and alcohols
Source: Royal Society of Chemistry journal article supplement (doi:10.1039/d4qo01417k), 2024-01-01
Supplement: d4qo01417k1.pdf [file d4qo01417k1.pdf]

# Supporting Information

## Synthesis of *S*-Alkyl Phosphorothioates/ Phosphorodithioates via Ring-Opening Reaction of Sulfonium Salts with S<sub>8</sub>, *H*-phosphonates or P<sub>4</sub>S<sub>10</sub>, and Alcohols

Li-Hua Yang, Lin Chen, Bei Li, Yuan-Xin Jin, Yun Liu, Sha Peng\*, and Long-Yong Xie\*  
*College of Chemistry and Bioengineering, Human University of Science and Engineering, Yongzhou,*  
*425100, China;*

*E-mail:* [longyongxie@yeah.net](mailto:longyongxie@yeah.net); [ps807055147@126.com](mailto:ps807055147@126.com)

### Table of Content

|                                             |            |
|---------------------------------------------|------------|
| <b>1. General information</b>               | <b>S2</b>  |
| <b>2. Experimental Section</b>              | <b>S2</b>  |
| <b>3. Characterization data of products</b> | <b>S6</b>  |
| <b>4. References</b>                        | <b>S30</b> |
| <b>5. NMR spectra of products</b>           | <b>S31</b> |

## 1. General Information

Unless otherwise specified, all reagents and solvents were obtained from commercial suppliers and used without further purification.  $^1\text{H}$ ,  $^{13}\text{C}$ ,  $^{31}\text{P}$  and  $^{19}\text{F}$  NMR spectra were recorded at 400, 101, 162 and 376 MHz, respectively. Chemical shifts were quoted in ppm relative to  $\text{CDCl}_3$  ( $\delta_{\text{H}} = 7.26$ ,  $\delta_{\text{C}} = 77.0$  ppm). Data are reported as follows: s = singlet, d = doublet, t = triplet, q = quartet, m = multiplet, dd = doublet of doublet, etc. The reactions were monitored by thin-layer chromatography (TLC) using GF<sub>254</sub> silica gel-coated TLC plates. Mass spectra were performed on a spectrometer operating on ESI-TOF. Melting points were measured on a melting point apparatus and were uncorrected.

## 2. Experimental Section

### General procedure for compounds **1** and **6**

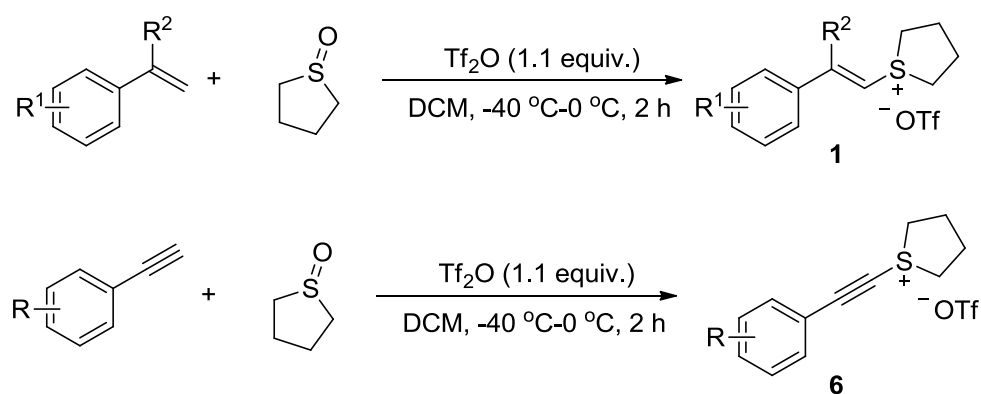

Compounds **1** and **6** were prepared according to Wen's work.<sup>[1]</sup> Under an argon atmosphere, tetramethylene sulfoxide (5.5 mmol, 1.1 equiv.) and anhydrous DCM (20 mL) were added to a 100 mL round bottom flask at -40 °C. The Tf<sub>2</sub>O (1.1 equiv., 5.5 mmol) was added dropwise under argon, and then alkene or alkyne (5.0 mmol, 1.0 equiv.) was added gradually. The reaction mixture was stirred at -40 °C for 30 min before warming to 0 °C. Upon completion monitored by the TLC, the solvent was removed under reduced pressure. The resulted crude product was dissolved in a small amount of anhydrous DCM, which was slowly dropped into anhydrous ether (20 mL) to precipitate out the cyclic sulfonium salts solid. The solid was collected by filtration and washed three times with ether to afford the cyclic sulfonium salt **1** or **6**, or the crude product was purified by column chromatography on silica gel (DCM/MeOH, from 50:1 to 20:1) to afford the alkenyl/alkynyl sulfonium salt **1** or **6**.

### General procedure for compounds **4** <sup>[2,3]</sup>

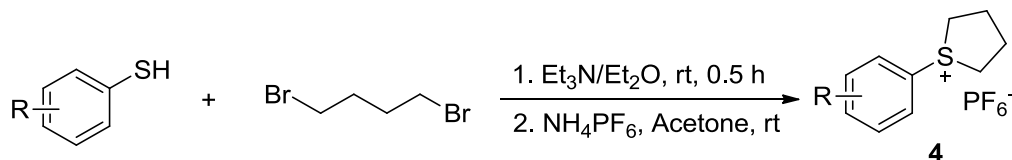

Triethylamine (15 mmol, 1.5 equiv.) was slowly added to a 100 mL round-bottom flask containing thiophenol (10 mmol, 1.0 equiv.), 1,4-dibromobutane (20 mmol, 2.0 equiv.) and Et<sub>2</sub>O (20 mL). The reaction mixture was stirred for 30 min then diluted with Et<sub>2</sub>O (20 mL) and washed with 1.2 N HCl (2 × 20 mL) and brine. The organic layer was dried over anhydrous sodium sulfate, concentrated under vacuum, and the crude material was dissolved in acetone (5 mL) and treated with NH<sub>4</sub>PF<sub>6</sub> (10 mmol, 1.0 equiv.). After stirring overnight at room temperature, the reaction mixture was filtered through a medium porosity fritted-glass funnel, the filtrate was concentrated under reduced pressure, and Et<sub>2</sub>O (10-20 mL) was added producing colorless crystals. The crystals were collected on a

coarse fritted-glass funnel and washed with water (2 mL), ethanol (2 mL), and Et<sub>2</sub>O (2 mL). The product was purified by recrystallization from acetone/Et<sub>2</sub>O to give analytically pure product **4**.

### General procedure for the synthesis of *S*-alkyl phosphorothioates **3**, **5** and **7**

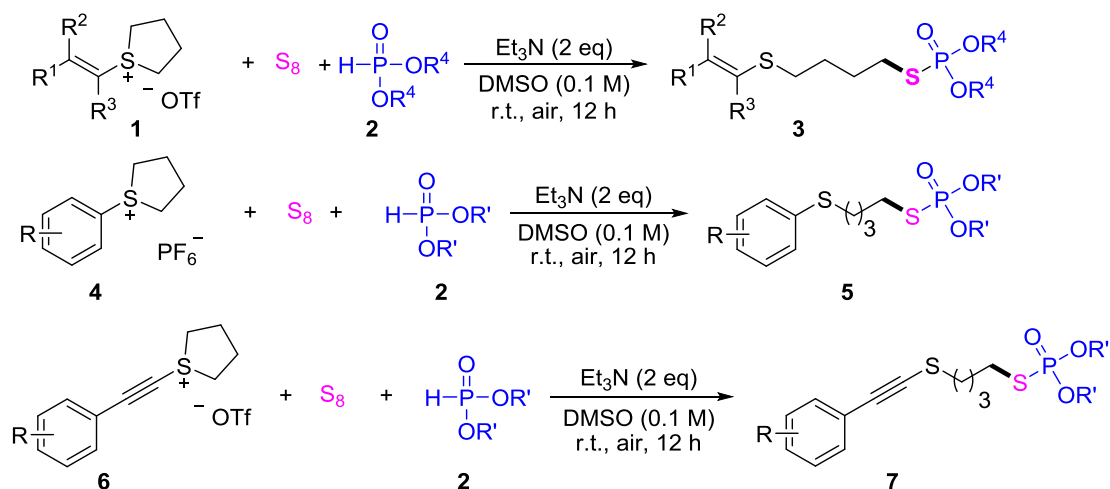

A 10 mL round-bottom flask equipped with a stirring bar was charged with cyclic sulfonium salt **1**, **4** or **6** (0.3 mmol, 1 equiv.), S<sub>8</sub> (0.6 mmol, 2 equiv.), *H*-phosphonate **2** (0.6 mmol, 2 equiv.), Et<sub>3</sub>N (0.6 mmol, 2 equiv.) and DMSO (3 mL). The reaction mixture was then stirred at room temperature for approximately 12 hours under air atmosphere, with progress monitored by TLC. Upon completion, 10 mL of H<sub>2</sub>O was added to the mixture, followed by extraction with EtOAc three times (10 mL × 3). The organic phase was subsequently dried over anhydrous sodium sulfate, concentrated under vacuum, and the residue was purified via flash column chromatography using a petroleum ether/ethyl acetate eluent mixture (PE/EA 4:1-2:1) to afford the desired product **3**, **5** or **7**.

### General procedure for the synthesis of *S*-alkyl phosphorodithioates **9**

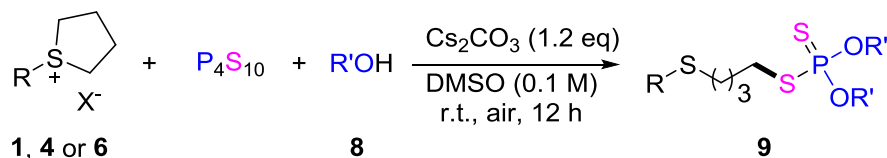

A 10 mL round-bottom flask equipped with a stirring bar was charged with cyclic sulfonium salt **1**, **4** or **6** (0.3 mmol, 1 equiv.), P<sub>4</sub>S<sub>10</sub> (0.3 mmol, 1 equiv.), alcohol **8** (3 mmol, 10 equiv.), Cs<sub>2</sub>CO<sub>3</sub> (0.36 mmol, 1.2 equiv.) and DMSO (3 mL). The reaction mixture was then stirred at room temperature for approximately 12 hours under air atmosphere, with progress monitored by TLC. Upon completion, 10 mL of H<sub>2</sub>O was added to the mixture, followed by extraction with EtOAc three times (10 mL × 3). The organic phase was subsequently dried over anhydrous sodium sulfate, concentrated under vacuum, and the residue was purified via flash column chromatography using a petroleum ether/ethyl acetate eluent mixture (PE/EA 6:1-3:1) to afford the ring-opening product **9**.

### General procedure for the synthesis of *S*-alkyl phosphoroselenenylates **10**

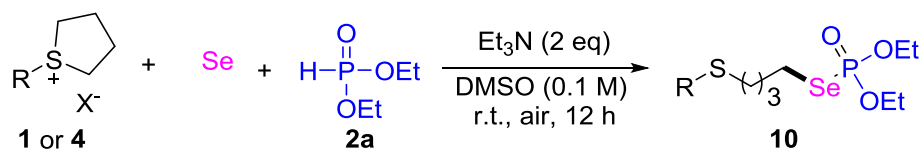

A 10 mL round-bottom flask equipped with a stirring bar was charged with cyclic sulfonium salt **1a** (0.3 mmol, 1 equiv.), Se powder (0.6 mmol, 2 equiv.), H-phosphonate **2a** (0.6 mmol, 2 equiv.), Et<sub>3</sub>N (0.6 mmol, 2 equiv.) and DMSO (3 mL). The reaction mixture was then stirred at room temperature for approximately 12 hours under air atmosphere, with progress monitored by TLC. Upon completion, 10 mL of H<sub>2</sub>O was added to the mixture, followed by extraction with EtOAc three times (10 mL × 3). The organic phase was subsequently dried over anhydrous sodium sulfate, concentrated under vacuum, and the residue was purified via flash column chromatography using a petroleum ether/ethyl acetate eluent mixture (PE/EA 4:1-2:1) to afford product **10**.

### Reaction conditions optimization for *S*-alkyl phosphorodithioates <sup>a</sup>

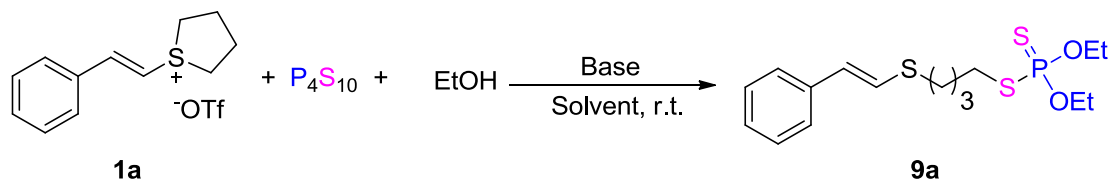

| Entry           | Amount of P <sub>4</sub> S <sub>10</sub> (eq) | Solvent            | Base                            | Yield of <b>3aa</b> % <sup>b</sup> |
|-----------------|-----------------------------------------------|--------------------|---------------------------------|------------------------------------|
| 1               | 1.5                                           | THF                | Cs <sub>2</sub> CO <sub>3</sub> | 78                                 |
| 2               | 1.5                                           | DCM                | Cs <sub>2</sub> CO <sub>3</sub> | 76                                 |
| 3               | 1.5                                           | CH <sub>3</sub> CN | Cs <sub>2</sub> CO <sub>3</sub> | 82                                 |
| 4               | 1.5                                           | DMSO               | Cs <sub>2</sub> CO <sub>3</sub> | 84                                 |
| 5               | 1.5                                           | Acetone            | Cs <sub>2</sub> CO <sub>3</sub> | 76                                 |
| 6               | 1.5                                           | EtOAc              | Cs <sub>2</sub> CO <sub>3</sub> | 71                                 |
| 7               | 1.5                                           | DMSO               | K <sub>2</sub> CO <sub>3</sub>  | 64                                 |
| 8               | 1.5                                           | DMSO               | Na <sub>2</sub> CO <sub>3</sub> | 58                                 |
| 9               | 1.5                                           | DMSO               | DBU                             | 7                                  |
| 10              | 1.5                                           | DMSO               | Et <sub>3</sub> N               | 65                                 |
| 11              | 1.2                                           | DMSO               | Cs <sub>2</sub> CO <sub>3</sub> | 85                                 |
| 12              | 1.0                                           | DMSO               | Cs <sub>2</sub> CO <sub>3</sub> | 85                                 |
| 13              | 0.9                                           | DMSO               | K <sub>2</sub> CO <sub>3</sub>  | 81                                 |
| 14 <sup>c</sup> | 1.0                                           | DMSO               | Cs <sub>2</sub> CO <sub>3</sub> | 84                                 |
| 15 <sup>d</sup> | 1.0                                           | DMSO               | Cs <sub>2</sub> CO <sub>3</sub> | 85                                 |
| 16 <sup>e</sup> | 1.0                                           | DMSO               | Cs <sub>2</sub> CO <sub>3</sub> | 79                                 |
| 17 <sup>f</sup> | 1.0                                           | DMSO               | Cs <sub>2</sub> CO <sub>3</sub> | 78                                 |
| 18 <sup>g</sup> | 1.0                                           | DMSO               | Cs <sub>2</sub> CO <sub>3</sub> | 85                                 |
| 19              | 1.0                                           | DMSO               | None                            | 0                                  |

<sup>a</sup> unless others noted, conditions: **1a** (0.1 mmol, 1 equiv.), P<sub>4</sub>S<sub>10</sub>, EtOH (1 mmol, 10 equiv.), Solvent (1 mL), Base (0.2 mmol, 2 equiv.), r.t., 12 h, air atmosphere. <sup>b</sup> Estimated by <sup>1</sup>H NMR using diethyl phthalate as internal reference. <sup>c</sup> 1.5 equiv. of Cs<sub>2</sub>CO<sub>3</sub> was used. <sup>d</sup> 1.2 equiv. of Cs<sub>2</sub>CO<sub>3</sub> was used. <sup>e</sup> 1.0 equiv. of Cs<sub>2</sub>CO<sub>3</sub> was used. <sup>f</sup> 8 equiv. of EtOH was used. <sup>g</sup> 15 equiv. of EtOH was used.

### Gram-scale synthesis of **3aa**

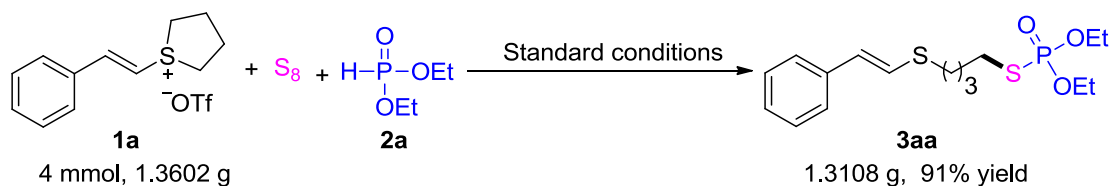

A 10 mL round-bottom flask equipped with a stirring bar was charged with sulfonium salt **1a** (1.3602 g, 4 mmol),

S<sub>8</sub> (0.2561 g, 8 mmol), *H*-phosphonate **2a** (1.1044 g, 8 mmol), Et<sub>3</sub>N (0.8089 g, 8 mmol), in DMSO (40 mL). The reaction mixture was then stirred at room temperature for approximately 12 hours under air atmosphere, with progress monitored by TLC. Upon completion, 20 mL of H<sub>2</sub>O was added to the mixture, followed by extraction with EtOAc three times (30 mL × 3). The organic phase was subsequently dried over anhydrous sodium sulfate, concentrated under vacuum, and the residue was purified *via* flash column chromatography using a petroleum ether/ethyl acetate eluent mixture (PE/EA 4:1-2:1) to afford 1.3108 g of **3aa**, yielding 91% based on **1a**.

### One-pot synthesis of **3aa**

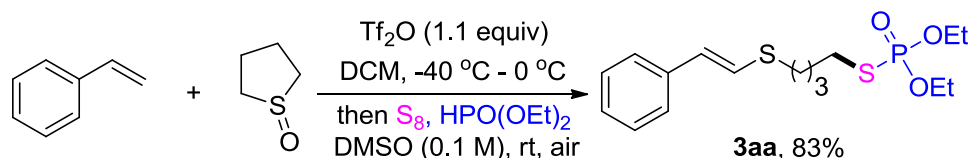

Under an argon atmosphere, sulfoxide (0.0573 g, 0.55 mmol, 1.1 equiv.) and anhydrous DCM (3.0 mL) were added to a 25.0 mL flask at -40 °C. The Tf<sub>2</sub>O (0.1551 g, 0.55 mmol, 1.1 equiv.) was then added dropwise, followed by the gradual addition of styrene (0.0520 g, 0.5 mmol, 1.0 equiv.). The reaction mixture was stirred at -40 °C for 30 min before being warmed to 0 °C. After stirring for 2 h, the reaction mixture was filtered and the solvent was removed under reduced pressure. Then, S<sub>8</sub> (0.0320 g, 1 mmol), HPO(OEt)<sub>2</sub> (0.1381 g, 1 mmol) and DMSO (5 mL) were added. The reaction mixture was stirred at room temperature for 12 h. Upon completion, 10 mL of H<sub>2</sub>O was added to the mixture, followed by extraction with EtOAc three times (10 mL × 3). The organic phase was subsequently dried over anhydrous sodium sulfate, concentrated under vacuum, and the residue was purified *via* flash column chromatography using a petroleum ether/ethyl acetate eluent mixture (PE/EA 4:1-2:1) to afford 0.1494 g of **3aa**, yielding 83% based on styrene.

### Oxidation of product **3aa**

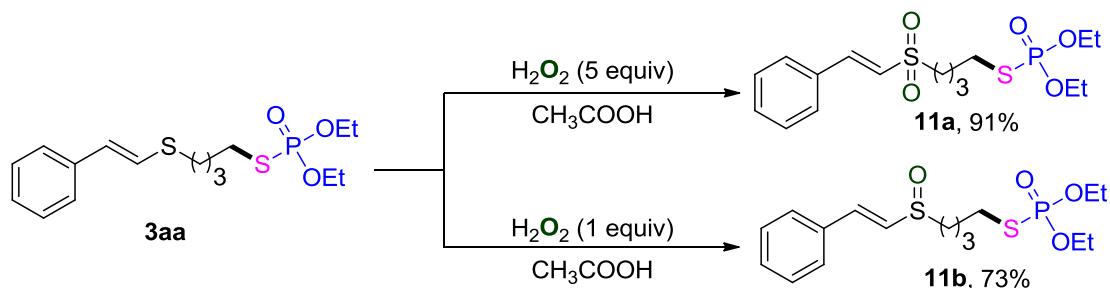

To a stirred solution of **3aa** (180.0 mg, 0.5 mmol, 1.0 equiv.) in 3 mL acetic acid was added hydrogen peroxide (35% aqueous solution, 1 equiv. or 5 equiv.), the reaction was heated to 100 °C using an oil bath and stirred for about 2 h. After completion, the reaction was allowed to cool to room temperature, then, 10 mL of H<sub>2</sub>O was added to the mixture, followed by extraction with EtOAc three times (10 mL × 3). The organic phase was then dried with anhydrous sodium sulfate, concentrated under vacuum. The residue was purified by flash column chromatography using a mixture of petroleum ether and ethyl acetate as eluent (PE/EA 4:1-2:1) to obtain the corresponding oxidative products **11a** and **11b** in 91% and 73% yields, respectively.

### Synthesis of **12a** via [3+2] Cycloaddition Reaction of **7aa** with PhCH<sub>2</sub>N<sub>3</sub>

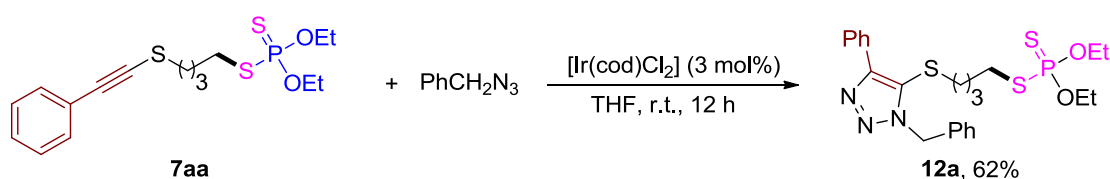

Under an argon atmosphere, compound **7aa** (71.6 mg, 0.2 mmol), PhCH<sub>2</sub>N<sub>3</sub> (39.9 mg, 0.3 mmol), [Ir(cod)Cl<sub>2</sub>](4.0 mg, 0.006 mmol) and THF (2 mL) were added to a 10 mL schlenk tube at room temperature for about 24 h. The resulting solution was concentrated under reduced pressure and purified by column chromatography on silica gel (PE/EA=2:1) to obtain 60.9 mg of **12a** as a light yellow oil in 62% yield. <sup>1</sup>H NMR (400 MHz, CDCl<sub>3</sub>) δ 8.12 (d, *J* = 7.8 Hz, 2H), 7.44 (t, *J* = 7.6 Hz, 2H), 7.39 – 7.29 (m, 6H), 5.69 (s, 2H), 4.21 – 4.00 (m, 4H), 2.62 – 2.51 (m, 2H), 2.31 (t, *J* = 7.2 Hz, 2H), 2.16 – 1.73 (m, 2H), 1.53 – 1.43 (m, 2H), 1.32 (t, *J* = 7.0 Hz, 6H); <sup>13</sup>C NMR (101 MHz, CDCl<sub>3</sub>) δ 149.3, 135.3, 130.6, 128.9, 128.6, 128.5, 128.3, 127.7, 126.9, 125.2, 63.9 (d, *J*<sub>C-P</sub> = 6.3 Hz), 52.1, 35.2, 32.7 (d, *J*<sub>C-P</sub> = 3.7 Hz), 29.0 (d, *J*<sub>C-P</sub> = 5.1 Hz), 27.9, 15.9 (d, *J*<sub>C-P</sub> = 8.2 Hz); <sup>31</sup>P NMR (162 MHz, Chloroform-*d*) δ 95.10. HRMS (ESI): *m/z* [M+H]<sup>+</sup> calcd for C<sub>23</sub>H<sub>31</sub>N<sub>3</sub>O<sub>3</sub>PS<sub>2</sub>: 492.1539; found: 492.1544.

### Control experiments

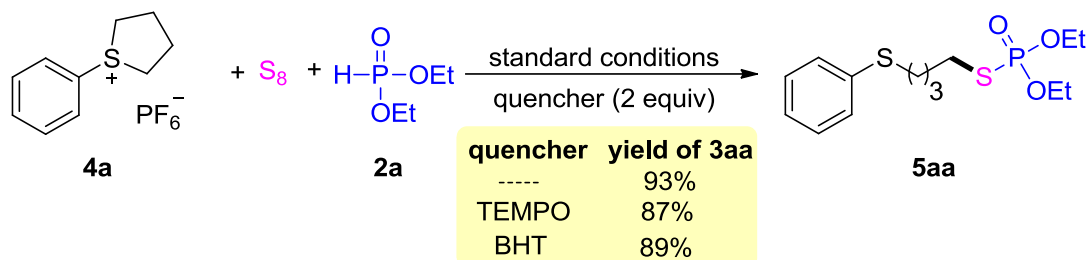

A 10 mL round-bottom flask equipped with a stirring bar was charged with sulfonium salt **4a** (0.0931 g, 0.3 mmol), S<sub>8</sub> (0.0192 g, 0.6 mmol), *H*-phosphonate **2a** (0.0828 g, 0.6 mmol), Et<sub>3</sub>N (0.0607 g, 0.6 mmol), TEMPO (0.0937 g, 0.6 mmol) or BHT (0.1322 g, 0.6 mmol) in DMSO (3 mL). The reaction mixture was then stirred at room temperature for approximately 12 hours under air atmosphere, with progress monitored by TLC. Upon completion, 10 mL of H<sub>2</sub>O was added to the mixture, followed by extraction with EtOAc three times (10 mL × 3). The organic phase was subsequently dried over anhydrous sodium sulfate, concentrated under vacuum, and the residue was purified *via* flash column chromatography using a petroleum ether/ethyl acetate eluent mixture (PE/EA 4:1-2:1) to afford 0.0872 g and 0.0892 g of **3aa** with the addition of TEMPO and BHT, yielding 87% and 89%, respectively.

### Synthesis of **2a'**

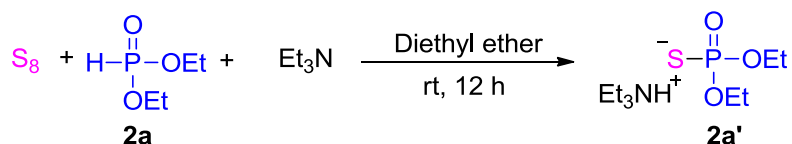

Compound **2a'** was synthesized according to the reference.<sup>[4]</sup> An oven dried round bottom flask was charged with diethyl *H*-phosphonate **2a** (324 mg, 2.30 mmol), and elemental sulfur (73.7 mg, 2.41 mmol). The flask was capped with a rubber septum and evacuated/back-filled with nitrogen. A 1:1 mixture of ethyl acetate:diethyl ether (8 mL/mmol substrate; limiting substrate conc. 0.125 M) was added via syringe and the reaction mixture was cooled down to 0 °C. Anhydrous triethylamine (0.96 mL, 6.90 mmol) was added dropwise, the reaction mixture was allowed to warm up to room temperature, and it was stirred for about 12 h. The solvents were evaporated under reduced pressure to obtain the product **2a'** directly used for the next step without further purification.

## 3. Characterization data of products

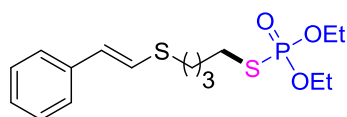

(*E*)-*O,O*-diethyl *S*-(4-(styrylthio)butyl) phosphorothioate (**3aa**): TLC (PE/EtOAc, 3:1),  $R_f = 0.49$ ; Colorless liquid (100.6 mg, 93%).  $^1\text{H}$  NMR (400 MHz,  $\text{CDCl}_3$ )  $\delta$  7.29 (d,  $J = 3.5$  Hz, 4H), 7.20 (d,  $J = 3.9$  Hz, 1H), 6.70 (d,  $J = 15.6$  Hz, 1H), 6.48 (d,  $J = 15.6$  Hz, 1H), 4.24 - 4.10 (m, 4H), 2.91 - 2.77 (m, 4H), 1.94 - 1.84 (m, 4H), 1.36 (t,  $J = 7.0$  Hz, 6H);  $^{13}\text{C}$  NMR (101 MHz,  $\text{CDCl}_3$ )  $\delta$  137.0, 128.8, 127.5, 127.1, 125.6, 124.8, 63.7 (d,  $J_{\text{C-P}} = 6.0$  Hz), 32.1, 30.5 (d,  $J_{\text{C-P}} = 3.9$  Hz), 29.9 (d,  $J_{\text{C-P}} = 5.4$  Hz), 28.3, 16.2 (d,  $J_{\text{C-P}} = 7.3$  Hz);  $^{31}\text{P}$  NMR (162 MHz,  $\text{CDCl}_3$ )  $\delta$  27.9. HRMS (ESI):  $m/z$   $[\text{M}+\text{H}]^+$  calcd for  $\text{C}_{16}\text{H}_{26}\text{O}_3\text{PS}_2$ : 361.1055; found: 361.1057.

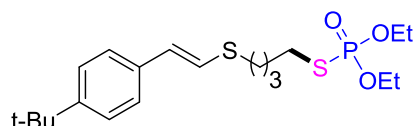

(*E*)-*S*-(4-((4-(*tert*-butyl)styryl)thio)butyl) *O,O*-diethyl phosphorothioate (**3ba**): TLC (PE/EtOAc, 3:1),  $R_f = 0.47$ ; Colorless liquid (113.7 mg, 91%).  $^1\text{H}$  NMR (400 MHz,  $\text{CDCl}_3$ )  $\delta$  7.35 - 7.17 (m, 4H), 6.66-6.58 (m, 1H), 6.51 - 6.40 (m, 1H), 4.23 - 4.05 (m, 4H), 2.92 - 2.72 (m, 4H), 1.91-1.78 (m, 4H), 1.40 - 1.04 (m, 15H);  $^{13}\text{C}$  NMR (101 MHz,  $\text{CDCl}_3$ )  $\delta$  150.2, 134.3, 127.8, 125.7, 125.4, 123.7, 63.7 (d,  $J_{\text{C-P}} = 5.9$  Hz), 34.6, 32.2, 31.4, 30.5 (d,  $J_{\text{C-P}} = 3.7$  Hz), 29.9 (d,  $J_{\text{C-P}} = 5.3$  Hz), 28.3, 16.2 (d,  $J_{\text{C-P}} = 7.2$  Hz);  $^{31}\text{P}$  NMR (162 MHz,  $\text{CDCl}_3$ )  $\delta$  27.9. HRMS (ESI):  $m/z$   $[\text{M}+\text{H}]^+$  calcd for  $\text{C}_{20}\text{H}_{34}\text{O}_3\text{PS}_2$ : 417.1681; found: 417.1685.

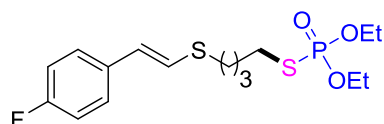

(*E*)-*O,O*-diethyl *S*-(4-((4-fluorostyryl)thio)butyl) phosphorothioate (**3ca**): TLC (PE/EtOAc, 3:1),  $R_f = 0.42$ ; Colorless liquid (97.6 mg, 86%).  $\delta$  7.30 - 7.20 (m, 2H), 6.99 (t,  $J = 7.4$  Hz, 2H), 6.61 (d,  $J = 14.3$  Hz, 1H), 6.45 (d,  $J = 14.9$  Hz, 1H), 4.25 - 4.08 (m, 4H), 2.90 - 2.81 (m, 4H), 1.94 - 1.83 (m, 4H), 1.36 - 1.35 (m, 6H).  $^{13}\text{C}$  NMR (101 MHz,  $\text{CDCl}_3$ )  $\delta$  160.5 (d,  $J_{\text{C-F}} = 244.8$  Hz), 133.3 (d,  $J_{\text{C-F}} = 3.2$  Hz), 127.0 (d,  $J_{\text{C-F}} = 7.9$  Hz), 126.4, 124.5 (d,  $J_{\text{C-F}} = 2.0$  Hz), 115.6 (d,  $J_{\text{C-F}} = 21.5$  Hz), 63.7 (d,  $J_{\text{C-P}} = 6.1$  Hz), 32.1, 30.4 (d,  $J_{\text{C-P}} = 3.9$  Hz), 29.9 (d,  $J_{\text{C-P}} = 5.3$  Hz), 28.3, 16.2 (d,  $J_{\text{C-P}} = 7.2$  Hz);  $^{19}\text{F}$  NMR (376 MHz,  $\text{CDCl}_3$ )  $\delta$  -115.22;  $^{31}\text{P}$  NMR (162 MHz,  $\text{CDCl}_3$ )  $\delta$  27.9. HRMS (ESI):  $m/z$   $[\text{M}+\text{H}]^+$  calcd for  $\text{C}_{16}\text{H}_{25}\text{FO}_3\text{PS}_2$ : 379.0961; found: 379.0963

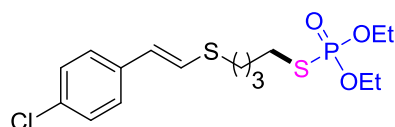

(*E*)-*S*-(4-((4-chlorostyryl)thio)butyl) *O,O*-diethyl phosphorothioate (**3da**): TLC (PE/EtOAc, 3:1),  $R_f = 0.50$ ; Colorless liquid (98.3 mg, 83%).  $^1\text{H}$  NMR (400 MHz,  $\text{CDCl}_3$ )  $\delta$  7.30 - 7.17 (m, 4H), 6.69 (dd,  $J = 15.6, 3.6$  Hz, 1H), 6.41 (dd,  $J = 15.6, 3.5$  Hz, 1H), 4.24 - 4.08 (m, 4H), 2.90 - 2.82 (m, 4H), 1.93 - 1.84 (m, 4H), 1.38-1.34 (m, 6H);  $^{13}\text{C}$  NMR (101 MHz,  $\text{CDCl}_3$ )  $\delta$  135.5, 132.5, 128.8, 126.7, 125.8, 125.7, 63.7 (d,  $J_{\text{C-P}} = 6.1$  Hz), 32.0, 30.4 (d,  $J_{\text{C-P}} = 3.8$  Hz), 29.9 (d,  $J_{\text{C-P}} = 5.3$  Hz), 28.2, 16.2 (d,  $J_{\text{C-P}} = 7.3$  Hz);  $^{31}\text{P}$  NMR (162 MHz,  $\text{CDCl}_3$ )  $\delta$  27.9. HRMS (ESI):  $m/z$   $[\text{M}+\text{H}]^+$  calcd for  $\text{C}_{16}\text{H}_{25}\text{ClO}_3\text{PS}_2$ : 395.0666; found: 395.0669

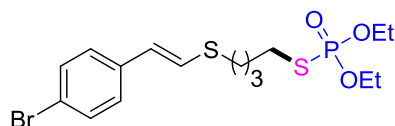

(*E*)-*S*-4-((4-bromostyryl)thio)butyl *O,O*-diethyl phosphorothioate (**3ea**): TLC (PE/EtOAc, 3:1),  $R_f = 0.43$ ; Colorless liquid (110.7 mg, 84%).  $^1\text{H}$  NMR (400 MHz,  $\text{CDCl}_3$ )  $\delta$  7.40 (d,  $J = 8.3$  Hz, 2H), 7.15 (d,  $J = 8.3$  Hz, 2H), 6.70 (d,  $J = 15.6$  Hz, 1H), 6.39 (d,  $J = 15.6$  Hz, 1H), 4.22 - 4.07 (m, 4H), 2.91 - 2.79 (m, 4H), 1.85 - 1.81 (m, 4H), 1.36 (t,  $J = 7.0$  Hz, 6H);  $^{13}\text{C}$  NMR (101 MHz,  $\text{CDCl}_3$ )  $\delta$  136.0, 131.8, 127.0, 126.0, 125.8, 120.6, 63.7 (d,  $J_{\text{C-P}} = 6.1$  Hz), 32.0, 30.4 (d,  $J_{\text{C-P}} = 3.9$  Hz), 29.9 (d,  $J_{\text{C-P}} = 5.3$  Hz), 28.3, 16.2 (d,  $J_{\text{C-P}} = 7.2$  Hz);  $^{31}\text{P}$  NMR (162 MHz,  $\text{CDCl}_3$ )  $\delta$  27.8. HRMS (ESI):  $m/z$   $[\text{M}+\text{H}]^+$  calcd for  $\text{C}_{16}\text{H}_{25}\text{BrO}_3\text{PS}_2$ : 439.0161; found: 439.0164.

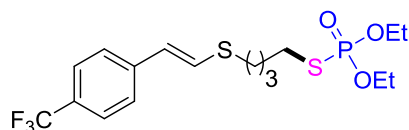

(*E*)-*O,O*-diethyl *S*-4-((4-(trifluoromethyl)styryl)thio)butyl phosphorothioate (**3fa**): TLC (PE/EtOAc, 3:1),  $R_f = 0.46$ ; Colorless liquid (105.4 mg, 82%).  $^1\text{H}$  NMR (400 MHz,  $\text{CDCl}_3$ )  $\delta$  7.53 (d,  $J = 8.1$  Hz, 2H), 7.37 (d,  $J = 8.1$  Hz, 2H), 6.85 (d,  $J = 15.6$  Hz, 1H), 6.45 (d,  $J = 15.6$  Hz, 1H), 4.22 - 4.10 (m, 4H), 2.92 - 2.82 (m, 4H), 1.89 - 1.80 (m, 4H), 1.36 (t,  $J = 7.1$  Hz, 6H);  $^{13}\text{C}$  NMR (101 MHz,  $\text{CDCl}_3$ )  $\delta$  140.3, 128.3 (q,  $J_{\text{C-F}} = 32.4$  Hz), 128.2, 125.5 (q,  $J_{\text{C-F}} = 3.8$  Hz), 125.4, 124.8, 124.2 (q,  $J_{\text{C-F}} = 272.6$  Hz), 63.5 (d,  $J_{\text{C-P}} = 6.1$  Hz), 31.7, 30.2 (d,  $J_{\text{C-P}} = 3.9$  Hz), 29.7 (d,  $J_{\text{C-P}} = 5.3$  Hz), 28.0, 16.0 (d,  $J_{\text{C-P}} = 7.3$  Hz);  $^{19}\text{F}$  NMR (376 MHz,  $\text{CDCl}_3$ )  $\delta$  -62.37;  $^{31}\text{P}$  NMR (162 MHz,  $\text{CDCl}_3$ )  $\delta$  27.8. HRMS (ESI):  $m/z$   $[\text{M}+\text{H}]^+$  calcd for  $\text{C}_{17}\text{H}_{25}\text{F}_3\text{O}_3\text{PS}_2$ : 429.0929; found: 429.0925.

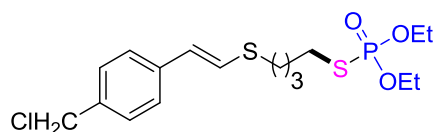

(*E*)-*S*-4-((4-(chloromethyl)styryl)thio)butyl *O,O*-diethyl phosphorothioate (**3ga**): TLC (PE/EtOAc, 3:1),  $R_f = 0.43$ ; Colorless liquid (79.7 mg, 65%).  $^1\text{H}$  NMR (400 MHz,  $\text{CDCl}_3$ )  $\delta$  7.27 (d,  $J = 9.6$  Hz, 4H), 6.71 (dd,  $J = 15.6, 2.6$  Hz, 1H), 6.46 (d,  $J = 15.5$  Hz, 1H), 4.21 - 3.95 (m, 6H), 3.59 (d,  $J = 4.4$  Hz, 2H), 2.84 (s, 2H), 1.99 - 1.82 (m, 4H), 1.32 - 1.23 (m, 6H);  $^{13}\text{C}$  NMR (101 MHz,  $\text{CDCl}_3$ )  $\delta$  136.5, 136.2, 129.4, 126.7, 125.8, 125.3, 63.7 (d,  $J_{\text{C-P}} = 5.8$  Hz), 44.5, 34.9 (d,  $J_{\text{C-P}} = 3.9$  Hz), 31.9, 31.4, 26.7, 16.1 (d,  $J_{\text{C-P}} = 7.3$  Hz);  $^{31}\text{P}$  NMR (162 MHz,  $\text{CDCl}_3$ )  $\delta$  26.8. HRMS (ESI):  $m/z$   $[\text{M}+\text{H}]^+$  calcd for  $\text{C}_{17}\text{H}_{27}\text{ClO}_3\text{PS}_2$ : 409.0822; found: 409.0824.

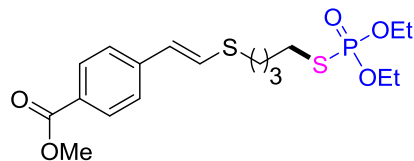

methyl (*E*)-4-(2-((4-((diethoxyphosphoryl)thio)butyl)thio)vinyl)benzoate (**3ha**): TLC (PE/EtOAc, 3:1),  $R_f = 0.38$ ; Colorless liquid (106.7 mg, 85%).  $^1\text{H}$  NMR (400 MHz,  $\text{CDCl}_3$ )  $\delta$  8.03 - 7.88 (m, 2H), 7.33 (d,  $J = 6.6$  Hz, 2H), 6.89 (dd,  $J = 15.6, 5.2$  Hz, 1H), 6.46 (dd,  $J = 15.5, 4.9$  Hz, 1H), 4.27 - 4.06 (m, 4H), 3.91 (d,  $J = 5.3$  Hz, 3H), 2.96 - 2.77 (m, 4H), 1.94-1.85 (m, 4H), 1.43 - 1.29 (m, 6H);  $^{13}\text{C}$  NMR (101 MHz,  $\text{CDCl}_3$ )  $\delta$  166.9, 141.3, 130.1, 128.5, 128.1, 125.3, 125.18, 63.7 (d,  $J_{\text{C-P}} = 6.0$  Hz), 52.1, 31.8, 30.4 (d,  $J_{\text{C-P}} = 3.8$  Hz), 29.8 (d,  $J_{\text{C-P}} = 5.3$  Hz), 28.1, 16.1 (d,  $J_{\text{C-P}} = 7.2$  Hz);  $^{31}\text{P}$  NMR (162 MHz,  $\text{CDCl}_3$ )  $\delta$  27.8. HRMS (ESI):  $m/z$   $[\text{M}+\text{H}]^+$  calcd for  $\text{C}_{18}\text{H}_{28}\text{O}_5\text{PS}_2$ : 419.1110; found: 419.1116.



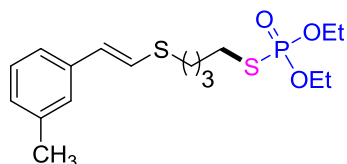

(*E*)-*O,O*-diethyl *S*-(4-((3-methylstyryl)thio)butyl) phosphorothioate (**3ia**): TLC (PE/EtOAc, 3:1),  $R_f = 0.57$ ; Colorless liquid (91.0 mg, 81%).  $^1\text{H}$  NMR (400 MHz,  $\text{CDCl}_3$ )  $\delta$  7.23-7.01 (m, 4H), 6.75 - 6.59 (m, 1H), 6.52 - 6.38 (m, 1H), 4.22 - 4.11 (m, 4H), 2.93 - 2.72 (m, 4H), 2.40 - 2.24 (m, 3H), 1.84-1.83 (m, 4H), 1.44 - 1.28 (m, 6H);  $^{13}\text{C}$  NMR (101 MHz,  $\text{CDCl}_3$ )  $\delta$  138.3, 136.9, 128.6, 127.8, 127.7, 126.3, 124.4, 122.8, 63.7 (d,  $J_{\text{C-P}} = 6.0$  Hz), 32.1, 30.5 (d,  $J_{\text{C-P}} = 3.6$  Hz), 29.9 (d,  $J_{\text{C-P}} = 5.3$  Hz), 28.3, 21.5, 16.2 (d,  $J_{\text{C-P}} = 7.2$  Hz);  $^{31}\text{P}$  NMR (162 MHz,  $\text{CDCl}_3$ )  $\delta$  27.9. HRMS (ESI):  $m/z$   $[\text{M}+\text{H}]^+$  calcd for  $\text{C}_{17}\text{H}_{28}\text{O}_3\text{PS}_2$ : 375.1212; found: 375.1216.

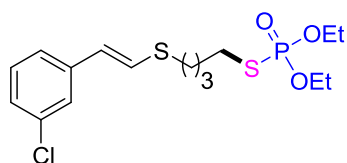

(*E*)-*S*-(4-((3-chlorostyryl)thio)butyl) *O,O*-diethyl phosphorothioate (**3ja**): TLC (PE/EtOAc, 3:1),  $R_f = 0.55$ ; Colorless liquid (99.5 mg, 84%).  $^1\text{H}$  NMR (400 MHz,  $\text{CDCl}_3$ )  $\delta$  7.28 - 7.26 (m, 1H), 7.24 - 7.18 (m, 1H), 7.15 - 7.09 (s, 2H), 6.73 (dd,  $J = 15.6, 2.7$  Hz, 1H), 6.37 (dd,  $J = 15.6, 2.4$  Hz, 1H), 4.22 - 4.07 (m, 4H), 2.90 - 2.82 (m, 4H), 1.91 - 1.73 (m, 4H), 1.38 - 1.34 (m, 6H);  $^{13}\text{C}$  NMR (101 MHz,  $\text{CDCl}_3$ )  $\delta$  138.8, 134.6, 129.9, 126.9, 126.8, 125.3, 123.7, 63.7 (d,  $J_{\text{C-P}} = 6.1$  Hz), 31.9, 30.4 (d,  $J_{\text{C-P}} = 3.9$  Hz), 29.8 (d,  $J_{\text{C-P}} = 5.3$  Hz), 28.2, 16.2 (d,  $J_{\text{C-P}} = 7.2$  Hz);  $^{31}\text{P}$  NMR (162 MHz,  $\text{CDCl}_3$ )  $\delta$  27.8. HRMS (ESI):  $m/z$   $[\text{M}+\text{H}]^+$  calcd for  $\text{C}_{16}\text{H}_{25}\text{ClO}_3\text{PS}_2$ : 395.0666; found: 395.0663.

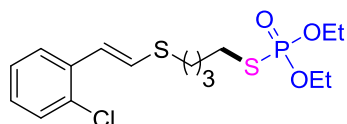

(*E*)-*S*-(4-((2-chlorostyryl)thio)butyl) *O,O*-diethyl phosphorothioate (**3ka**): TLC (PE/EtOAc, 3:1),  $R_f = 0.48$ ; Colorless liquid (103.1 mg, 87%).  $^1\text{H}$  NMR (400 MHz,  $\text{CDCl}_3$ )  $\delta$  7.44 (d,  $J = 7.7$  Hz, 1H), 7.33 (d,  $J = 7.8$  Hz, 1H), 7.22 - 7.18 (m, 1H), 7.14 - 7.11 (m, 1H), 6.8 (d,  $J = 15.6$  Hz, 1H), 6.7 (d,  $J = 15.6$  Hz, 1H), 4.25 - 4.09 (m, 4H), 2.92 - 2.83 (m, 4H), 1.92 - 1.80 (m, 4H), 1.36 (t,  $J = 7.1$  Hz, 6H);  $^{13}\text{C}$  NMR (100 MHz,  $\text{CDCl}_3$ )  $\delta$  135.0, 132.0, 129.8, 127.9, 127.0, 126.0, 122.4, 63.7 (d,  $J_{\text{C-P}} = 6.1$  Hz), 31.8, 30.5 (d,  $J_{\text{C-P}} = 4.0$  Hz), 29.9 (d,  $J_{\text{C-P}} = 5.4$  Hz), 28.1, 16.1 (d,  $J_{\text{C-P}} = 7.3$  Hz);  $^{31}\text{P}$  NMR (162 MHz,  $\text{CDCl}_3$ )  $\delta$  27.9. HRMS (ESI):  $m/z$   $[\text{M}+\text{H}]^+$  calcd for  $\text{C}_{16}\text{H}_{25}\text{ClO}_3\text{PS}_2$ : 395.0666; found: 395.0667.

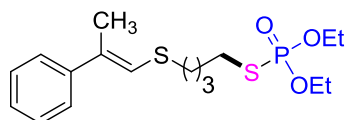

(*E*)-*O,O*-diethyl *S*-(4-((2-phenylprop-1-en-1-yl)thio)butyl) phosphorothioate (**3la**): TLC (PE/EtOAc, 3:1),  $R_f = 0.61$ ; Colorless liquid (96.6 mg, 86%).  $^1\text{H}$  NMR (400 MHz,  $\text{CDCl}_3$ )  $\delta$  7.37 - 7.26 (m, 4H), 7.23 - 7.20 (m, 1H), 6.27 (s, 1H), 4.22 - 4.05 (m, 4H), 2.90 - 2.78 (m, 4H), 2.12 (s, 3H), 1.84 - 1.80 (m, 4H), 1.37 - 1.34 (m, 6H);  $^{13}\text{C}$  NMR (101 MHz,  $\text{CDCl}_3$ )  $\delta$  142.0, 133.9, 128.4, 126.8, 125.1, 123.3, 63.6 (d,  $J_{\text{C-P}} = 6.0$  Hz), 33.5, 30.5 (d,  $J_{\text{C-P}} = 3.9$  Hz), 29.7 (d,  $J_{\text{C-P}} = 5.4$  Hz), 29.2, 17.7, 16.1 (d,  $J_{\text{C-P}} = 7.2$  Hz).

Hz);  $^{31}\text{P}$  NMR (162 MHz,  $\text{CDCl}_3$ )  $\delta$  27.9. HRMS (ESI):  $m/z$   $[\text{M}+\text{H}]^+$  calcd for  $\text{C}_{17}\text{H}_{28}\text{O}_3\text{PS}_2$ : 375.1212; found: 375.1208.

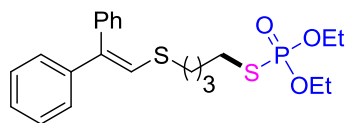

*S*-(4-((2,2-diphenylvinyl)thio)butyl) *O,O*-diethyl phosphorothioate (**3ma**): TLC (PE/EtOAc, 3:1),  $R_f$  = 0.47; Colorless liquid (115.3 mg, 88%).  $^1\text{H}$  NMR (400 MHz,  $\text{CDCl}_3$ )  $\delta$  7.29 (m, 10H), 6.55 (s, 1H), 4.23 - 4.07 (m, 4H), 2.89 - 2.74 (m, 4H), 1.88 - 1.81 (m, 4H), 1.34 (t,  $J$  = 7.0 Hz, 6H);  $^{13}\text{C}$  NMR (101 MHz,  $\text{CDCl}_3$ )  $\delta$  141.9, 139.5, 139.0, 129.7, 128.4, 128.3, 127.6, 127.1, 127.0, 125.7, 63.7 (d,  $J_{\text{C-P}}$  = 6.0 Hz), 34.2, 30.4 (d,  $J_{\text{C-P}}$  = 4.0 Hz), 29.7 (d,  $J_{\text{C-P}}$  = 5.4 Hz), 29.1, 16.1 (d,  $J_{\text{C-P}}$  = 7.2 Hz);  $^{31}\text{P}$  NMR (162 MHz,  $\text{CDCl}_3$ )  $\delta$  28.0. HRMS (ESI):  $m/z$   $[\text{M}+\text{H}]^+$  calcd for  $\text{C}_{22}\text{H}_{30}\text{O}_3\text{PS}_2$ : 437.1368; found: 437.1366.

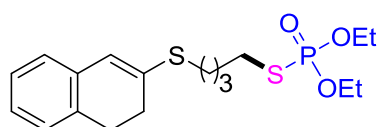

*S*-(4-((3,4-dihydronaphthalen-2-yl)thio)butyl) *O,O*-diethyl phosphorothioate (**3na**): TLC (PE/EtOAc, 3:1),  $R_f$  = 0.53; Colorless liquid (97.4 mg, 84%).  $^1\text{H}$  NMR (400 MHz,  $\text{CDCl}_3$ )  $\delta$  7.16 - 7.01 (m, 3H), 6.97 (d,  $J$  = 6.5 Hz, 1H), 6.21 (s, 1H), 4.24 - 4.06 (m, 4H), 2.95 - 2.79 (m, 6H), 2.39 (t,  $J$  = 7.0 Hz, 2H), 1.87 - 1.82 (m, 4H), 1.41 - 1.30 (m, 6H);  $^{13}\text{C}$  NMR (101 MHz,  $\text{CDCl}_3$ )  $\delta$  136.7, 134.4, 133.6, 127.3, 126.7, 126.1, 124.9, 119.7, 63.6 (d,  $J_{\text{C-P}}$  = 6.0 Hz), 30.4 (d,  $J_{\text{C-P}}$  = 3.9 Hz), 30.0 (d,  $J_{\text{C-P}}$  = 5.5 Hz), 29.1, 28.4, 27.3, 16.1 (d,  $J_{\text{C-P}}$  = 7.3 Hz);  $^{31}\text{P}$  NMR (162 MHz,  $\text{CDCl}_3$ )  $\delta$  27.9. HRMS (ESI):  $m/z$   $[\text{M}+\text{H}]^+$  calcd for  $\text{C}_{18}\text{H}_{28}\text{O}_3\text{PS}_2$ : 387.1212; found: 387.1215.

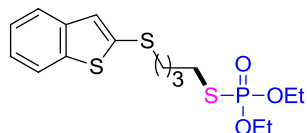

*S*-(4-(benzo[*b*]thiophen-2-ylthio)butyl) *O,O*-diethyl phosphorothioate (**3oa**): TLC (PE/EtOAc, 3:1),  $R_f$  = 0.47; Colorless liquid (107.8 mg, 92%).  $^1\text{H}$  NMR (400 MHz,  $\text{CDCl}_3$ )  $\delta$  7.92 (d,  $J$  = 7.8 Hz, 1H), 7.86 (d,  $J$  = 7.9 Hz, 1H), 7.45 - 7.36 (m, 3H), 4.20 - 4.07 (m, 4H), 2.90 - 2.77 (m, 4H), 1.87 - 1.79 (m, 2H), 1.74 - 1.67 (m, 2H), 1.34 (t,  $J$  = 7.1 Hz, 6H);  $^{13}\text{C}$  NMR (101 MHz,  $\text{CDCl}_3$ )  $\delta$  139.9, 139.1, 127.3, 126.6, 124.9, 124.5, 123.0, 122.6, 63.6 (d,  $J_{\text{C-P}}$  = 6.0 Hz), 34.2, 30.4 (d,  $J_{\text{C-P}}$  = 4.0 Hz), 29.7 (d,  $J_{\text{C-P}}$  = 5.4 Hz), 28.3, 16.1 (d,  $J_{\text{C-P}}$  = 7.3 Hz);  $^{31}\text{P}$  NMR (162 MHz,  $\text{CDCl}_3$ )  $\delta$  27.9. HRMS (ESI):  $m/z$   $[\text{M}+\text{H}]^+$  calcd for  $\text{C}_{16}\text{H}_{24}\text{O}_3\text{PS}_3$ : 391.0620; found: 391.0625.

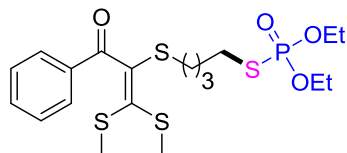

*S*-(4-((1,1-bis(methylthio)-3-oxo-3-phenylprop-1-en-2-yl)thio)butyl) *O,O*-diethyl phosphorothioate (**3pa**): TLC (PE/EtOAc, 3:1),  $R_f$  = 0.38; Colorless liquid (121.1 mg, 84%).  $^1\text{H}$  NMR (400 MHz,  $\text{CDCl}_3$ )  $\delta$  7.95 (d,  $J$  = 7.6 Hz, 2H), 7.62 - 7.58 (m, 1H), 7.51 - 7.47 (m, 2H), 4.29 - 4.00 (m, 4H), 2.79 - 2.72 (m, 2H), 2.61 (t,  $J$  = 6.9 Hz, 2H), 2.44 (s, 3H), 2.08 (s, 3H), 1.77 - 1.62 (m, 4H), 1.35 (t,  $J$  = 7.1 Hz, 6H);  $^{13}\text{C}$  NMR (101 MHz,  $\text{CDCl}_3$ )  $\delta$  191.2, 139.0, 135.9, 133.8, 132.7, 129.5, 128.9, 63.6 (d,  $J_{\text{C-P}}$  = 5.9 Hz), 32.9, 30.4 (d,  $J_{\text{C-P}}$  = 4.0 Hz), 29.7 (d,  $J_{\text{C-P}}$  = 5.6 Hz), 28.4, 18.4, 16.3, 16.1 (d,  $J_{\text{C-P}}$  = 7.3 Hz);  $^{31}\text{P}$  NMR

(162 MHz, CDCl<sub>3</sub>)  $\delta$  27.9. HRMS (ESI):  $m/z$  [M+H]<sup>+</sup> calcd for C<sub>19</sub>H<sub>30</sub>O<sub>4</sub>PS<sub>4</sub>: 481.0759; found: 481.0766.

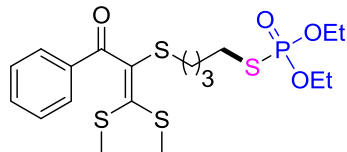

*S*-(4-((1-(1,3-dithiolan-2-ylidene)-2-oxo-2-phenylethylthio)butyl) *O,O*-diethyl phosphorothioate (**3qa**): TLC (PE/EtOAc, 3:1),  $R_f$  = 0.41; Colorless liquid (117.7 mg, 82%). <sup>1</sup>H NMR (400 MHz, CDCl<sub>3</sub>)  $\delta$  7.75 (d,  $J$  = 7.6 Hz, 2H), 7.48 - 7.45 (m, 1H), 7.41 - 7.37 (m, 2H), 4.20 - 4.06 (m, 4H), 3.56 (t,  $J$  = 6.4 Hz, 2H), 3.40 (t,  $J$  = 6.4 Hz, 2H), 2.70 - 2.63 (m, 2H), 2.46 (t,  $J$  = 6.8 Hz, 2H), 1.62 - 1.55 (m, 2H), 1.51 - 1.44 (m, 2H), 1.34 (t,  $J$  = 7.1 Hz, 6H); <sup>13</sup>C NMR (101 MHz, CDCl<sub>3</sub>)  $\delta$  192.1, 176.8, 138.8, 131.2, 129.0, 127.7, 114.1, 63.6 (d,  $J_{C-P}$  = 6.0 Hz), 40.8, 35.6, 35.5, 30.4 (d,  $J_{C-P}$  = 3.9 Hz), 29.6 (d,  $J_{C-P}$  = 5.7 Hz), 27.9, 16.2 (d,  $J_{C-P}$  = 7.2 Hz); <sup>31</sup>P NMR (162 MHz, CDCl<sub>3</sub>)  $\delta$  28.0. HRMS (ESI):  $m/z$  [M+H]<sup>+</sup> calcd for C<sub>19</sub>H<sub>28</sub>O<sub>4</sub>PS<sub>4</sub>: 479.0603; found: 479.0608.

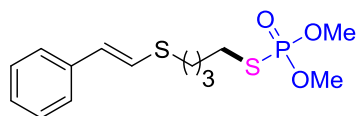

(*E*)-*O,O*-dimethyl *S*-(4-(styrylthio)butyl) phosphorothioate (**3ab**): TLC (PE/EtOAc, 3:1),  $R_f$  = 0.24; Colorless liquid (89.8 mg, 90%). <sup>1</sup>H NMR (400 MHz, CDCl<sub>3</sub>)  $\delta$  7.33 - 7.25 (m, 4H), 7.20 - 7.14 (m, 1H), 6.69 (dd,  $J$  = 15.6, 2.1 Hz, 1H), 6.48 (dd,  $J$  = 15.6, 2.0 Hz, 1H), 3.79 (dd,  $J$  = 12.6, 2.1 Hz, 6H), 2.91 - 2.79 (m, 4H), 1.83 (s, 4H); <sup>13</sup>C NMR (101 MHz, CDCl<sub>3</sub>)  $\delta$  137.0, 128.7, 127.5, 127.0, 125.6, 124.7, 53.9 (d,  $J_{C-P}$  = 6.0 Hz), 32.0, 30.4 (d,  $J_{C-P}$  = 3.9 Hz), 29.9 (d,  $J_{C-P}$  = 5.2 Hz), 28.3; <sup>31</sup>P NMR (162 MHz, CDCl<sub>3</sub>)  $\delta$  31.4. HRMS (ESI):  $m/z$  [M+H]<sup>+</sup> calcd for C<sub>14</sub>H<sub>22</sub>O<sub>3</sub>PS<sub>2</sub>: 333.0742; found: 333.0744.

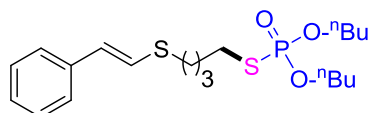

(*E*)-*O,O*-dibutyl *S*-(4-(styrylthio)butyl) phosphorothioate (**3ac**): TLC (PE/EtOAc, 3:1),  $R_f$  = 0.69; Colorless liquid (109.9 mg, 88%). <sup>1</sup>H NMR (400 MHz, CDCl<sub>3</sub>)  $\delta$  7.29 - 7.28 (m, 4H), 7.20 - 7.18 (m, 1H), 6.70 (dd,  $J$  = 15.6, 3.6 Hz, 1H), 6.48 (dd,  $J$  = 15.5, 3.6 Hz, 1H), 4.13 - 3.98 (m, 4H), 2.91 - 2.77 (m, 4H), 1.83 - 1.82 (m, 4H), 1.71 - 1.62 (m, 4H), 1.40 (m, 4H), 0.96 - 0.92 (m, 6H); <sup>13</sup>C NMR (101 MHz, CDCl<sub>3</sub>)  $\delta$  137.0, 128.7, 127.4, 127.0, 125.5, 124.7, 67.3 (d,  $J_{C-P}$  = 6.5 Hz), 32.2 (d,  $J_{C-P}$  = 7.3 Hz), 32.0, 30.4 (d,  $J_{C-P}$  = 3.9 Hz), 29.9 (d,  $J_{C-P}$  = 5.4 Hz), 28.3, 18.8, 13.6; <sup>31</sup>P NMR (162 MHz, CDCl<sub>3</sub>)  $\delta$  28.0. HRMS (ESI):  $m/z$  [M+H]<sup>+</sup> calcd for C<sub>20</sub>H<sub>34</sub>O<sub>3</sub>PS<sub>2</sub>: 417.1681; found: 417.1685.

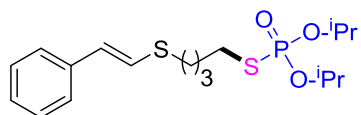

(*E*)-*O,O*-diisopropyl *S*-(4-(styrylthio)butyl) phosphorothioate (**3ad**): TLC (PE/EtOAc, 3:1),  $R_f$  = 0.57; Colorless liquid (100.2 mg, 86%). <sup>1</sup>H NMR (400 MHz, CDCl<sub>3</sub>)  $\delta$  7.29 - 7.28 (m, 4H), 7.19 - 7.13 (m, 1H), 6.69 (d,  $J$  = 15.6 Hz, 1H), 6.47 (d,  $J$  = 15.6 Hz, 1H), 4.77 - 4.71 (m, 2H), 2.91 - 2.76 (m, 4H), 1.86 - 1.83 (m, 4H), 1.36 (t,  $J$  = 6.7 Hz, 12H); <sup>13</sup>C NMR (101 MHz, CDCl<sub>3</sub>)  $\delta$  137.0, 128.7, 127.4, 127.0, 125.6, 124.8, 72.7 (d,  $J_{C-P}$  = 6.5 Hz), 32.0, 30.6 (d,  $J_{C-P}$  = 3.9 Hz), 29.8 (d,  $J_{C-P}$  = 6.0 Hz), 28.3, 24.0 (d,  $J_{C-P}$  = 4.1 Hz), 23.7 (d,  $J_{C-P}$  = 5.4 Hz); <sup>31</sup>P NMR (162 MHz, CDCl<sub>3</sub>)  $\delta$  25.4. HRMS (ESI):  $m/z$  [M+H]<sup>+</sup> calcd for C<sub>18</sub>H<sub>30</sub>O<sub>3</sub>PS<sub>2</sub>: 389.1368; found: 389.1371.

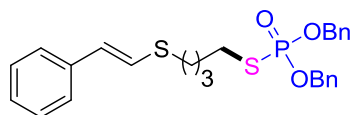

(*E*)-*O,O*-dibenzyl *S*-(4-(styrylthio)butyl) phosphorothioate (**3ae**): TLC (PE/EtOAc, 3:1),  $R_f = 0.52$ ; Colorless liquid (123.6 mg, 85%).  $^1\text{H}$  NMR (400 MHz,  $\text{CDCl}_3$ )  $\delta$  7.38 - 7.26 (m, 15H), 6.65 (d,  $J = 15.6$  Hz, 1H), 6.44 (d,  $J = 15.6$  Hz, 1H), 5.16 - 5.09 (m, 4H), 2.84 - 2.75 (m, 2H), 2.70 (t,  $J = 6.6$  Hz, 2H), 1.78 - 1.67 (m, 4H);  $^{13}\text{C}$  NMR (101 MHz,  $\text{CDCl}_3$ )  $\delta$  137.0, 135.6, 135.5, 128.7, 128.7, 128.7, 128.2, 127.4, 127.0, 125.6, 124.7, 69.1, 69.0, 32.0, 30.5 (d,  $J_{\text{C-P}} = 3.9$  Hz), 29.7 (d,  $J_{\text{C-P}} = 5.7$  Hz), 28.2;  $^{31}\text{P}$  NMR (162 MHz,  $\text{CDCl}_3$ )  $\delta$  29.0. HRMS (ESI):  $m/z$   $[\text{M}+\text{H}]^+$  calcd for  $\text{C}_{26}\text{H}_{30}\text{O}_3\text{PS}_2$ : 485.1368; found: 485.1374.

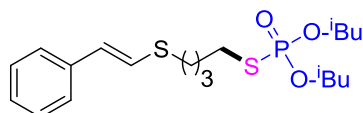

(*E*)-*O,O*-diisobutyl *S*-(4-(styrylthio)butyl) phosphorothioate (**3af**): TLC (PE/EtOAc, 3:1),  $R_f = 0.67$ ; Colorless liquid (107.5 mg, 86%).  $^1\text{H}$  NMR (400 MHz,  $\text{CDCl}_3$ )  $\delta$  7.36 - 7.23 (m, 4H), 7.19 - 7.13 (m, 1H), 6.69 (dd,  $J = 15.6, 1.7$  Hz, 1H), 6.47 (dd,  $J = 15.6, 1.5$  Hz, 1H), 3.91 - 3.77 (m, 4H), 2.92 - 2.79 (m, 4H), 2.00 - 1.94 (m, 2H), 1.83 - 1.82 (m, 4H), 0.96 - 0.94 (m, 12H);  $^{13}\text{C}$  NMR (101 MHz,  $\text{CDCl}_3$ )  $\delta$  137.0, 128.7, 127.4, 127.0, 125.5, 124.7, 73.4 (d,  $J_{\text{C-P}} = 6.9$  Hz), 32.0, 30.3 (d,  $J_{\text{C-P}} = 3.9$  Hz), 29.9 (d,  $J_{\text{C-P}} = 5.5$  Hz), 29.0 (d,  $J_{\text{C-P}} = 7.5$  Hz), 28.3, 18.8;  $^{31}\text{P}$  NMR (162 MHz,  $\text{CDCl}_3$ )  $\delta$  28.0. HRMS (ESI):  $m/z$   $[\text{M}+\text{H}]^+$  calcd for  $\text{C}_{20}\text{H}_{34}\text{O}_3\text{PS}_2$ : 417.1681; found: 417.1679.

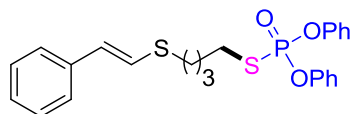

(*E*)-*O,O*-diphenyl *S*-(4-(styrylthio)butyl) phosphorothioate (**3ag**): TLC (PE/EtOAc, 3:1),  $R_f = 0.76$ ; Colorless liquid (99.9 mg, 73%).  $^1\text{H}$  NMR (400 MHz,  $\text{CDCl}_3$ )  $\delta$  7.36 - 7.20 (m, 15H), 6.64 (d,  $J = 15.5$  Hz, 1H), 6.44 (d,  $J = 15.6$  Hz, 1H), 2.99 - 2.92 (m, 2H), 2.70 (t,  $J = 6.4$  Hz, 2H), 1.72 - 1.62 (m, 4H);  $^{13}\text{C}$  NMR (101 MHz,  $\text{CDCl}_3$ )  $\delta$  150.3 (d,  $J_{\text{C-P}} = 8.2$  Hz), 150.2, 137.0, 130.0, 129.6, 128.8, 127.5, 127.1, 125.8, 125.6, 124.7, 120.8 (d,  $J_{\text{C-P}} = 4.9$  Hz), 120.3, 115.5, 31.9, 31.4 (d,  $J_{\text{C-P}} = 4.2$  Hz), 29.7 (d,  $J_{\text{C-P}} = 5.6$  Hz), 28.1;  $^{31}\text{P}$  NMR (162 MHz,  $\text{CDCl}_3$ )  $\delta$  21.4. HRMS (ESI):  $m/z$   $[\text{M}+\text{H}]^+$  calcd for  $\text{C}_{24}\text{H}_{26}\text{O}_3\text{PS}_2$ : 457.1055; found: 457.1058.

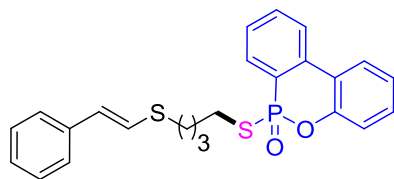

(*E*)-6-((4-(styrylthio)butyl)thio)dibenzo[*c,e*][1,2]oxaphosphinine 6-oxide (**3ah**): TLC (PE/EtOAc, 3:1),  $R_f = 0.22$ ; Colorless liquid (88.2 mg, 67%).  $^1\text{H}$  NMR (400 MHz,  $\text{CDCl}_3$ )  $\delta$  8.02 - 7.97 (m, 1H), 7.94 - 7.89 (m, 2H), 7.69 (t,  $J = 7.7$  Hz, 1H), 7.53 - 7.49 (m, 1H), 7.37 (t,  $J = 7.6$  Hz, 1H), 7.32 - 7.15 (m, 7H), 6.65 (d,  $J = 15.6$  Hz, 1H), 6.44 (d,  $J = 15.6$  Hz, 1H), 3.01 - 2.81 (m, 2H), 2.74 (t,  $J = 6.9$  Hz, 2H), 1.84 - 1.71 (m, 4H);  $^{13}\text{C}$  NMR (101 MHz,  $\text{CDCl}_3$ )  $\delta$  149.6 (d,  $J_{\text{C-P}} = 9.4$  Hz), 137.0, 136.1 (d,  $J_{\text{C-P}} = 7.4$  Hz), 133.9 (d,  $J_{\text{C-P}} = 2.5$  Hz), 130.9, 130.5 (d,  $J_{\text{C-P}} = 10.9$  Hz), 128.8, 128.7, 127.4, 127.0, 125.9 (d,  $J_{\text{C-P}} = 135.6$  Hz), 125.6, 125.3, 125.1, 124.7, 124.0 (d,  $J_{\text{C-P}} = 11.2$  Hz), 122.4 (d,  $J_{\text{C-P}} = 12.1$  Hz), 120.5 (d,  $J_{\text{C-P}} = 6.7$  Hz), 31.9, 29.9 (d,  $J_{\text{C-P}} = 4.5$  Hz), 29.6 (d,  $J_{\text{C-P}} = 3.2$  Hz), 28.2;  $^{31}\text{P}$  NMR (162 MHz,  $\text{CDCl}_3$ )  $\delta$  38.1. HRMS (ESI):  $m/z$   $[\text{M}+\text{H}]^+$  calcd for  $\text{C}_{24}\text{H}_{24}\text{O}_2\text{PS}_2$ : 439.0950; found: 439.0944.

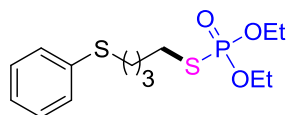

*O,O*-diethyl *S*-(4-(phenylthio)butyl) phosphorothioate (**5aa**): TLC (PE/EtOAc, 3:1),  $R_f = 0.56$ ; Colorless liquid (93.3 mg, 93%).  $^1\text{H}$  NMR (400 MHz,  $\text{CDCl}_3$ )  $\delta$  7.36 - 7.23 (m, 4H), 7.19 - 7.16 (m, 1H), 4.23 - 4.06 (m, 4H), 2.95 - 2.91 (m, 2H), 2.88 - 2.77 (m, 2H), 1.88 - 1.71 (m, 4H), 1.40 - 1.29 (m, 6H);  $^{13}\text{C}$  NMR (101 MHz,  $\text{CDCl}_3$ )  $\delta$  136.3, 129.3, 129.0, 126.1, 63.6 (d,  $J_{\text{C-P}} = 6.0$  Hz), 33.1, 30.5 (d,  $J_{\text{C-P}} = 3.9$  Hz), 29.9 (d,  $J_{\text{C-P}} = 5.4$  Hz), 28.0, 16.1 (d,  $J_{\text{C-P}} = 7.3$  Hz);  $^{31}\text{P}$  NMR (162 MHz,  $\text{CDCl}_3$ )  $\delta$  28.0. HRMS (ESI):  $m/z$   $[\text{M}+\text{H}]^+$  calcd for  $\text{C}_{14}\text{H}_{24}\text{O}_3\text{PS}_2$ : 335.0899; found: 335.0897.

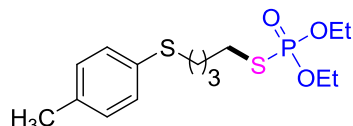

*O,O*-diethyl *S*-(4-(*p*-tolylthio)butyl) phosphorothioate (**5ba**): TLC (PE/EtOAc, 3:1),  $R_f = 0.56$ ; Colorless liquid (96.2 mg, 92%).  $^1\text{H}$  NMR (400 MHz,  $\text{CDCl}_3$ )  $\delta$  7.25 (d,  $J = 7.7$  Hz, 2H), 7.10 (d,  $J = 7.7$  Hz, 2H), 4.23 - 4.06 (m, 4H), 2.92 - 2.79 (m, 4H), 2.32 (s, 3H), 1.86 - 1.79 (m, 2H), 1.75 - 1.68 (m, 2H), 1.35 (t,  $J = 7.1$  Hz, 6H);  $^{13}\text{C}$  NMR (101 MHz,  $\text{CDCl}_3$ )  $\delta$  136.3, 132.4, 130.3, 129.8, 63.6 (d,  $J_{\text{C-P}} = 6.0$  Hz), 33.9, 30.5 (d,  $J_{\text{C-P}} = 4.0$  Hz), 29.8 (d,  $J_{\text{C-P}} = 5.5$  Hz), 28.1, 21.1, 16.2 (d,  $J_{\text{C-P}} = 7.3$  Hz);  $^{31}\text{P}$  NMR (162 MHz,  $\text{CDCl}_3$ )  $\delta$  28.0. HRMS (ESI):  $m/z$   $[\text{M}+\text{H}]^+$  calcd for  $\text{C}_{15}\text{H}_{26}\text{O}_3\text{PS}_2$ : 349.1055; found: 349.1058.

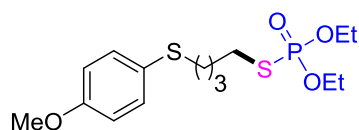

*O,O*-diethyl *S*-(4-(4-methoxyphenylthio)butyl) phosphorothioate (**5ca**): TLC (PE/EtOAc, 3:1),  $R_f = 0.48$ ; Colorless liquid (95.1 mg, 87%).  $^1\text{H}$  NMR (400 MHz,  $\text{CDCl}_3$ )  $\delta$  7.34 (d,  $J = 8.4$  Hz, 2H), 6.84 (d,  $J = 8.4$  Hz, 2H), 4.21 - 4.09 (m, 4H), 3.80 (s, 3H), 2.86 - 2.78 (m, 4H), 1.85 - 1.77 (m, 2H), 1.71 - 1.64 (m, 2H), 1.35 (t,  $J = 7.1$  Hz, 6H);  $^{13}\text{C}$  NMR (101 MHz,  $\text{CDCl}_3$ )  $\delta$  159.0, 133.4, 126.2, 114.6, 63.6 (d,  $J_{\text{C-P}} = 6.0$  Hz), 55.4, 35.3, 30.5 (d,  $J_{\text{C-P}} = 4.0$  Hz), 29.7 (d,  $J_{\text{C-P}} = 5.6$  Hz), 28.2, 16.2 (d,  $J_{\text{C-P}} = 7.3$  Hz);  $^{31}\text{P}$  NMR (162 MHz,  $\text{CDCl}_3$ )  $\delta$  28.0. HRMS (ESI):  $m/z$   $[\text{M}+\text{H}]^+$  calcd for  $\text{C}_{15}\text{H}_{26}\text{O}_4\text{PS}_2$ : 365.1055; found: 365.1057.

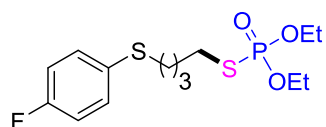

*O,O*-diethyl *S*-(4-(4-fluorophenylthio)butyl) phosphorothioate (**5da**): TLC (PE/EtOAc, 3:1),  $R_f = 0.63$ ; Colorless liquid (94.1 mg, 89%).  $^1\text{H}$  NMR (400 MHz,  $\text{CDCl}_3$ )  $\delta$  7.37 - 7.27 (m, 2H), 7.01 - 6.99 (m, 2H), 4.22 - 4.05 (m, 4H), 2.91 - 2.79 (m, 4H), 1.87 - 1.77 (m, 2H), 1.74 - 1.65 (m, 2H), 1.39 - 1.29 (m, 6H);  $^{13}\text{C}$  NMR (101 MHz,  $\text{CDCl}_3$ )  $\delta$  161.8 (d,  $J_{\text{C-F}} = 244.8$  Hz), 132.5 (d,  $J_{\text{C-F}} = 7.9$  Hz), 131.0 (d,  $J_{\text{C-F}} = 3.2$  Hz), 116.1 (d,  $J_{\text{C-F}} = 21.7$  Hz), 63.6 (d,  $J_{\text{C-P}} = 6.0$  Hz), 34.5, 30.4 (d,  $J_{\text{C-F}} = 3.9$  Hz), 29.7 (d,  $J_{\text{C-F}} = 5.4$  Hz), 28.0, 16.1 (d,  $J_{\text{C-P}} = 7.2$  Hz);  $^{19}\text{F}$  NMR (376 MHz,  $\text{CDCl}_3$ )  $\delta$  -115.52;  $^{31}\text{P}$  NMR (162 MHz,  $\text{CDCl}_3$ )  $\delta$  27.87. HRMS (ESI):  $m/z$   $[\text{M}+\text{H}]^+$  calcd for  $\text{C}_{14}\text{H}_{23}\text{FO}_3\text{PS}_2$ : 353.0805; found: 353.0801.

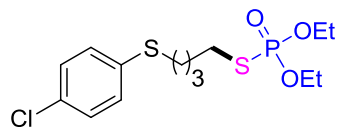

*S*-(4-((4-chlorophenyl)thio)butyl) *O,O*-diethyl phosphorothioate (**5ea**): TLC (PE/EtOAc, 3:1),  $R_f = 0.52$ ; Colorless liquid (89.6 mg, 81%).  $^1\text{H}$  NMR (400 MHz,  $\text{CDCl}_3$ )  $\delta$  7.28 - 7.25 (m, 4H), 4.25 - 4.10 (m, 4H), 2.94 - 2.81 (m, 4H), 1.89 - 1.74 (m, 4H), 1.38 - 1.34 (m, 6H);  $^{13}\text{C}$  NMR (101 MHz,  $\text{CDCl}_3$ )  $\delta$  134.9, 132.1, 130.7, 129.1, 63.7 (d,  $J_{\text{C-P}} = 6.0$  Hz), 33.5, 30.4 (d,  $J_{\text{C-P}} = 3.9$  Hz), 29.9 (d,  $J_{\text{C-P}} = 5.4$  Hz), 27.9, 16.2 (d,  $J_{\text{C-P}} = 7.3$  Hz);  $^{31}\text{P}$  NMR (162 MHz,  $\text{CDCl}_3$ )  $\delta$  27.9. HRMS (ESI):  $m/z$   $[\text{M}+\text{H}]^+$  calcd for  $\text{C}_{14}\text{H}_{23}\text{ClO}_3\text{PS}_2$ : 369.0509; found: 369.0513.

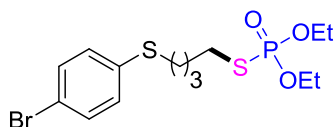

*S*-(4-((4-bromophenyl)thio)butyl) *O,O*-diethyl phosphorothioate (**5fa**): TLC (PE/EtOAc, 3:1),  $R_f = 0.50$ ; Colorless liquid (105.4 mg, 85%).  $^1\text{H}$  NMR (400 MHz,  $\text{CDCl}_3$ )  $\delta$  7.47 - 7.32 (m, 2H), 7.28 - 7.14 (m, 2H), 4.23 - 4.04 (m, 4H), 2.93 - 2.73 (m, 4H), 1.81 - 1.74 (m, 4H), 1.37 - 1.33 (m, 6H);  $^{13}\text{C}$  NMR (101 MHz,  $\text{CDCl}_3$ )  $\delta$  135.6, 132.1, 130.9, 119.9, 63.7 (d,  $J_{\text{C-P}} = 6.1$  Hz), 33.3, 30.4 (d,  $J_{\text{C-P}} = 4.0$  Hz), 29.9 (d,  $J_{\text{C-P}} = 5.4$  Hz), 27.9, 16.2 (d,  $J_{\text{C-P}} = 7.3$  Hz);  $^{31}\text{P}$  NMR (162 MHz,  $\text{CDCl}_3$ )  $\delta$  27.8. HRMS (ESI):  $m/z$   $[\text{M}+\text{H}]^+$  calcd for  $\text{C}_{14}\text{H}_{23}\text{BrO}_3\text{PS}_2$ : 413.0004; found: 413.0007.

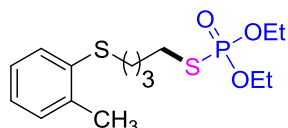

*O,O*-diethyl *S*-(4-(*o*-tolylthio)butyl) phosphorothioate (**5ga**): TLC (PE/EtOAc, 3:1),  $R_f = 0.50$ ; Colorless liquid (85.7 mg, 82%).  $^1\text{H}$  NMR (400 MHz,  $\text{CDCl}_3$ )  $\delta$  7.25 (d,  $J = 7.6$  Hz, 1H), 7.17 - 7.14 (m, 2H), 7.12 - 7.06 (m, 1H), 4.22 - 4.09 (m, 4H), 2.94 - 2.81 (m, 4H), 2.36 (s, 3H), 1.90 - 1.78 (m, 4H), 1.36 (t,  $J = 7.0$  Hz, 6H);  $^{13}\text{C}$  NMR (101 MHz,  $\text{CDCl}_3$ )  $\delta$  137.6, 135.7, 130.2, 127.9, 126.5, 125.7, 63.7 (d,  $J_{\text{C-P}} = 6.0$  Hz), 32.3, 30.5 (d,  $J_{\text{C-P}} = 4.0$  Hz), 30.0 (d,  $J_{\text{C-P}} = 5.5$  Hz), 27.9, 20.5, 16.2 (d,  $J_{\text{C-P}} = 7.3$  Hz);  $^{31}\text{P}$  NMR (162 MHz,  $\text{CDCl}_3$ )  $\delta$  27.9. HRMS (ESI):  $m/z$   $[\text{M}+\text{H}]^+$  calcd for  $\text{C}_{15}\text{H}_{26}\text{O}_3\text{PS}_2$ : 349.1055; found: 349.1053.

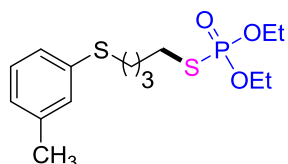

*O,O*-diethyl *S*-(4-(*m*-tolylthio)butyl) phosphorothioate (**5ha**): TLC (PE/EtOAc, 3:1),  $R_f = 0.59$ ; Colorless liquid (86.8 mg, 83%).  $^1\text{H}$  NMR (400 MHz,  $\text{CDCl}_3$ )  $\delta$  7.28 - 7.10 (m, 3H), 6.99 (d,  $J = 6.7$  Hz, 1H), 4.23 - 4.08 (m, 4H), 2.95 - 2.88 (m, 2H), 2.84 - 2.81 (m, 2H), 2.32 (s, 3H), 1.84 - 1.74 (m, 4H), 1.40 - 1.32 (m, 6H);  $^{13}\text{C}$  NMR (101 MHz,  $\text{CDCl}_3$ )  $\delta$  138.8, 136.1, 130.1, 128.9, 127.1, 126.4, 63.7 (d,  $J_{\text{C-P}} = 6.0$  Hz), 33.2, 30.5 (d,  $J_{\text{C-P}} = 4.0$  Hz), 29.9 (d,  $J_{\text{C-P}} = 5.5$  Hz), 28.1, 21.5, 16.2 (d,  $J_{\text{C-P}} = 7.3$  Hz);  $^{31}\text{P}$  NMR (162 MHz,  $\text{CDCl}_3$ )  $\delta$  28.0. HRMS (ESI):  $m/z$   $[\text{M}+\text{H}]^+$  calcd for  $\text{C}_{15}\text{H}_{26}\text{O}_3\text{PS}_2$ : 349.1055; found: 349.1059.

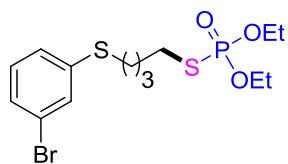

*S*-(4-((3-bromophenyl)thio)butyl) *O,O*-diethyl phosphorothioate (**5ia**): TLC (PE/EtOAc, 3:1),  $R_f = 0.55$ ; Colorless liquid (106.6 mg, 86%).  $^1\text{H}$  NMR (400 MHz,  $\text{CDCl}_3$ )  $\delta$  7.43 (s, 1H), 7.30-7.21 (m, 2H), 7.17 - 7.11 (m, 1H), 4.26 - 4.03 (m, 4H), 2.98 - 2.89 (m, 2H), 2.90 - 2.73 (m, 2H), 1.89 - 1.76 (m, 4H), 1.44 - 1.29 (m, 6H);  $^{13}\text{C}$  NMR (101 MHz,  $\text{CDCl}_3$ )  $\delta$  139.0, 131.2, 130.3, 129.0, 127.4, 122.9, 63.7 (d,  $J_{\text{C-P}} = 6.1$  Hz), 32.9, 30.4 (d,  $J_{\text{C-P}} = 3.9$  Hz), 29.9 (d,  $J_{\text{C-P}} = 5.4$  Hz), 27.8, 16.2 (d,  $J_{\text{C-P}} = 7.3$  Hz);  $^{31}\text{P}$  NMR (162 MHz,  $\text{CDCl}_3$ )  $\delta$  27.83. HRMS (ESI):  $m/z$   $[\text{M}+\text{H}]^+$  calcd for  $\text{C}_{14}\text{H}_{23}\text{BrO}_3\text{PS}_2$ : 413.0004; found: 413.0006.

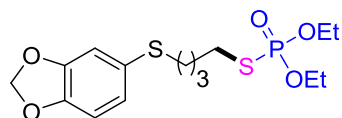

*S*-(4-(benzo[d][1,3]dioxol-5-ylthio)butyl) *O,O*-diethyl phosphorothioate (**5ja**): TLC (PE/EtOAc, 3:1),  $R_f = 0.50$ ; Colorless liquid (96.5 mg, 85%).  $^1\text{H}$  NMR (400 MHz,  $\text{CDCl}_3$ )  $\delta$  6.93 - 6.89 (s, 2H), 6.75 - 6.72 (m, 1H), 5.96 (d,  $J = 2.3$  Hz, 2H), 4.21 - 4.07 (m, 4H), 2.86 - 2.80 (m, 4H), 1.85 - 1.76 (m, 2H), 1.73 - 1.64 (m, 2H), 1.39 - 1.31 (m, 6H);  $^{13}\text{C}$  NMR (101 MHz,  $\text{CDCl}_3$ )  $\delta$  148.1, 147.1, 127.8, 125.5, 112.1, 108.8, 101.4, 63.6 (d,  $J_{\text{C-P}} = 6.0$  Hz), 35.3, 30.5 (d,  $J_{\text{C-P}} = 3.9$  Hz), 29.7 (d,  $J_{\text{C-P}} = 5.5$  Hz), 28.1, 16.1 (d,  $J_{\text{C-P}} = 7.2$  Hz);  $^{31}\text{P}$  NMR (162 MHz,  $\text{CDCl}_3$ )  $\delta$  28.0. HRMS (ESI):  $m/z$   $[\text{M}+\text{H}]^+$  calcd for  $\text{C}_{15}\text{H}_{24}\text{O}_3\text{PS}_2$ : 379.0797; found: 379.0792.

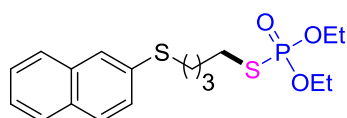

*O,O*-diethyl *S*-(4-(naphthalen-2-ylthio)butyl) phosphorothioate (**5ka**): TLC (PE/EtOAc, 3:1),  $R_f = 0.55$ ; Colorless liquid (108.4 mg, 94%).  $^1\text{H}$  NMR (400 MHz,  $\text{CDCl}_3$ )  $\delta$  7.79 - 7.73 (m, 4H), 7.49 - 7.38 (m, 3H), 4.21 - 4.06 (m, 4H), 3.03 (t,  $J = 6.9$  Hz, 2H), 2.90 - 2.81 (m, 2H), 1.90 - 1.78 (m, 4H), 1.34 (t,  $J = 7.0$  Hz, 6H);  $^{13}\text{C}$  NMR (101 MHz,  $\text{CDCl}_3$ )  $\delta$  133.9, 131.8, 128.5, 127.8, 127.5, 127.1, 127.1, 126.7, 125.8, 63.7 (d,  $J_{\text{C-P}} = 6.0$  Hz), 33.1, 30.5 (d,  $J_{\text{C-P}} = 4.0$  Hz), 29.9 (d,  $J_{\text{C-P}} = 5.5$  Hz), 28.0, 16.2 (d,  $J_{\text{C-P}} = 7.2$  Hz);  $^{31}\text{P}$  NMR (162 MHz,  $\text{CDCl}_3$ )  $\delta$  27.9. HRMS (ESI):  $m/z$   $[\text{M}+\text{H}]^+$  calcd for  $\text{C}_{18}\text{H}_{26}\text{O}_3\text{PS}_2$ : 385.1055; found: 385.1058.

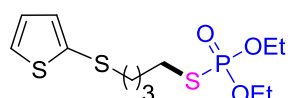

*O,O*-diethyl *S*-(4-(thiophen-2-ylthio)butyl) phosphorothioate (**5la**): TLC (PE/EtOAc, 3:1),  $R_f = 0.28$ ; Colorless liquid (79.7 mg, 78%).  $^1\text{H}$  NMR (400 MHz,  $\text{CDCl}_3$ )  $\delta$  7.35 (d,  $J = 5.1$  Hz, 1H), 7.12 (s, 1H), 6.98 (s, 1H), 4.23 - 4.09 (m, 4H), 2.87 - 2.78 (m, 4H), 1.86 - 1.81 (m, 2H), 1.76 - 1.68 (m, 2H), 1.36 (t,  $J = 7.0$  Hz, 6H);  $^{13}\text{C}$  NMR (101 MHz,  $\text{CDCl}_3$ )  $\delta$  134.3, 133.9, 129.5, 127.7, 63.7 (d,  $J_{\text{C-P}} = 6.0$  Hz), 38.3, 30.5 (d,  $J_{\text{C-P}} = 3.9$  Hz), 29.6 (d,  $J_{\text{C-P}} = 5.5$  Hz), 28.2, 16.2 (d,  $J_{\text{C-P}} = 7.3$  Hz);  $^{31}\text{P}$  NMR (162 MHz,  $\text{CDCl}_3$ )  $\delta$  28.0. HRMS (ESI):  $m/z$   $[\text{M}+\text{H}]^+$  calcd for  $\text{C}_{12}\text{H}_{22}\text{O}_3\text{PS}_3$ : 341.0463; found: 341.0461.

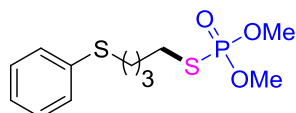

*O,O*-dimethyl *S*-(4-(phenylthio)butyl) phosphorothioate (**5ab**): TLC (PE/EtOAc, 3:1),  $R_f = 0.47$ ; Colorless liquid (83.6 mg, 91%).  $^1\text{H}$  NMR (400 MHz,  $\text{CDCl}_3$ )  $\delta$  7.36 - 7.25 (m, 4H), 7.20 - 7.14 (m, 1H), 3.84 - 3.78 (m, 3H), 3.78 - 3.74 (m, 3H), 2.95 - 2.92 (m, 2H), 2.89 - 2.79 (m, 2H), 1.94 - 1.76 (m, 4H);  $^{13}\text{C}$  NMR (101 MHz,  $\text{CDCl}_3$ )  $\delta$  136.3, 129.4, 129.0, 126.1, 53.9 (d,  $J = 6.0$  Hz), 33.1, 30.4 (d,  $J_{\text{C-P}}$

= 4.0 Hz), 29.9 (d,  $J_{C-P}$  = 5.3 Hz), 28.0;  $^{31}\text{P}$  NMR (162 MHz,  $\text{CDCl}_3$ )  $\delta$  31.4. HRMS (ESI):  $m/z$   $[\text{M}+\text{H}]^+$  calcd for  $\text{C}_{12}\text{H}_{20}\text{O}_3\text{PS}_2$ : 307.0586; found: 307.0582.

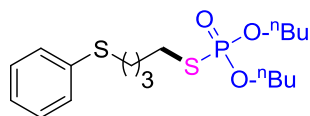

*O,O*-dibutyl *S*-(4-(phenylthio)butyl) phosphorothioate (**5ac**): TLC (PE/EtOAc, 3:1),  $R_f$  = 0.77; Colorless liquid (109.0 mg, 93%).  $^1\text{H}$  NMR (400 MHz,  $\text{CDCl}_3$ )  $\delta$  7.36 - 7.24 (m, 4H), 7.19 - 7.16 (m, 1H), 4.14 - 4.01 (m, 4H), 2.93 (t,  $J$  = 7.0 Hz, 2H), 2.87 - 2.80 (m, 2H), 1.86 - 1.80 (m, 2H), 1.78 - 1.73 (m, 2H), 1.71 - 1.62 (m, 4H), 1.47 - 1.35 (m, 4H), 0.93 (t,  $J$  = 7.4 Hz, 6H);  $^{13}\text{C}$  NMR (101 MHz,  $\text{CDCl}_3$ )  $\delta$  136.3, 129.3, 129.0, 126.0, 67.3(d,  $J_{C-P}$  = 6.4 Hz), 33.1, 32.2(d,  $J$  = 7.3 Hz), 30.4 (d,  $J_{C-P}$  = 3.9 Hz), 29.9 (d,  $J_{C-P}$  = 5.5 Hz), 28.0, 18.8, 13.6;  $^{31}\text{P}$  NMR (162 MHz,  $\text{CDCl}_3$ )  $\delta$  28.1. HRMS (ESI):  $m/z$   $[\text{M}+\text{H}]^+$  calcd for  $\text{C}_{18}\text{H}_{32}\text{O}_3\text{PS}_2$ : 391.1525; found: 391.1526.

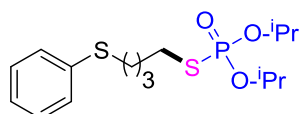

*O,O*-diisopropyl *S*-(4-(phenylthio)butyl) phosphorothioate (**5ad**): TLC (PE/EtOAc, 3:1),  $R_f$  = 0.77; Colorless liquid (97.9 mg, 90%).  $^1\text{H}$  NMR (400 MHz,  $\text{CDCl}_3$ )  $\delta$  7.34 - 7.26 (m, 4H), 7.19-7.16 (m, 1H), 4.78 - 4.67 (m, 2H), 2.93 (t,  $J$  = 7.0 Hz, 2H), 2.88 - 2.81 (m, 2H), 1.88 - 1.81 (m, 2H), 1.78 - 1.71 (m, 2H), 1.37 - 1.33 (m, 12H);  $^{13}\text{C}$  NMR (101 MHz,  $\text{CDCl}_3$ )  $\delta$  136.4, 129.3, 129.0, 126.1, 72.7 (d,  $J_{C-P}$  = 6.5 Hz), 33.2, 30.6 (d,  $J_{C-P}$  = 4.0 Hz), 29.8 (d,  $J_{C-P}$  = 6.1 Hz), 28.1, 24.0(dd,  $J_{C-P}$  = 4.2 Hz), 23.9(dd,  $J$  = 5.5 Hz), 23.7;  $^{31}\text{P}$  NMR (162 MHz,  $\text{CDCl}_3$ )  $\delta$  25.4. HRMS (ESI):  $m/z$   $[\text{M}+\text{H}]^+$  calcd for  $\text{C}_{16}\text{H}_{28}\text{O}_3\text{PS}_2$ : 363.1212; found: 363.1217.

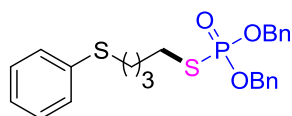

*O,O*-dibenzyl *S*-(4-(phenylthio)butyl) phosphorothioate (**5ae**): TLC (PE/EtOAc, 3:1),  $R_f$  = 0.78; Colorless liquid (119.7 mg, 87%).  $^1\text{H}$  NMR (400 MHz,  $\text{CDCl}_3$ )  $\delta$  7.42 - 7.23 (m, 14H), 7.18 - 7.15 (m, 1H), 5.18 - 5.06 (m, 4H), 2.84 - 2.71 (m, 4H), 1.79 - 1.58 (m, 4H);  $^{13}\text{C}$  NMR (101 MHz,  $\text{CDCl}_3$ )  $\delta$  136.3, 135.6 (d,  $J_{C-P}$  = 7.5 Hz), 129.3, 129.0, 128.7, 128.2, 126.1, 69.0 (d,  $J_{C-P}$  = 5.9 Hz), 33.0, 30.5 (d,  $J_{C-P}$  = 3.9 Hz), 29.7 (d,  $J_{C-P}$  = 5.8 Hz), 27.9;  $^{31}\text{P}$  NMR (162 MHz,  $\text{CDCl}_3$ )  $\delta$  29.0. HRMS (ESI):  $m/z$   $[\text{M}+\text{H}]^+$  calcd for  $\text{C}_{24}\text{H}_{28}\text{O}_3\text{PS}_2$ : 459.1212; found: 459.1218.

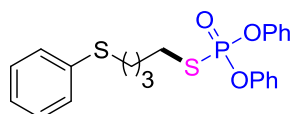

*O,O*-diphenyl *S*-(4-(phenylthio)butyl) phosphorothioate (**5af**): TLC (PE/EtOAc, 3:1),  $R_f$  = 0.78; Colorless liquid (87.8 mg, 68%).  $^1\text{H}$  NMR (400 MHz,  $\text{CDCl}_3$ )  $\delta$  7.40 - 7.15 (m, 15H), 2.98 - 2.88 (m, 2H), 2.82 (t,  $J$  = 7.0 Hz, 2H), 1.79 - 1.70 (m, 2H), 1.67 - 1.60 (m, 2H);  $^{13}\text{C}$  NMR (101 MHz,  $\text{CDCl}_3$ )  $\delta$  150.3 (d,  $J_{C-P}$  = 8.1 Hz), 136.3, 130.0, 129.4, 129.0, 126.2, 125.8, 120.8 (d,  $J_{C-P}$  = 4.9 Hz), 33.1, 31.4 (d,  $J_{C-P}$  = 4.2 Hz), 29.8 (d,  $J_{C-P}$  = 5.7 Hz), 27.8;  $^{31}\text{P}$  NMR (162 MHz,  $\text{CDCl}_3$ )  $\delta$  21.3. HRMS (ESI):  $m/z$   $[\text{M}+\text{H}]^+$  calcd for  $\text{C}_{22}\text{H}_{24}\text{O}_3\text{PS}_2$ : 431.0899; found: 431.0903.

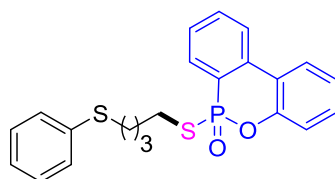



6-((4-(phenylthio)butyl)thio)dibenzo[*c,e*][1,2]oxaphosphinine 6-oxide (**5ag**): TLC (PE/EtOAc, 3:1),  $R_f = 0.47$ ; Colorless liquid (91.6 mg, 74%).  $^1\text{H NMR}$  (400 MHz,  $\text{CDCl}_3$ )  $\delta$  8.03 - 7.90 (m, 3H), 7.73 - 7.69 (m, 1H), 7.55 - 7.51 (m, 1H), 7.41 - 7.37 (m, 1H), 7.32 - 7.15 (m, 7H), 2.98 - 2.79 (m, 4H), 1.86 - 1.76 (m, 2H), 1.71 - 1.64 (m, 2H);  $^{13}\text{C NMR}$  (101 MHz,  $\text{CDCl}_3$ )  $\delta$  149.6 (d,  $J_{\text{C-P}} = 9.4$  Hz), 136.4, 136.2 (d,  $J_{\text{C-P}} = 7.5$  Hz), 133.9 (d,  $J_{\text{C-P}} = 2.5$  Hz), 130.9, 130.6 (d,  $J_{\text{C-P}} = 10.8$  Hz), 129.3, 129.0, 128.8 (d,  $J_{\text{C-P}} = 14.9$  Hz), 126.6, 126.1, 125.9 (d,  $J_{\text{C-P}} = 135.4$  Hz), 125.2 (d,  $J_{\text{C-P}} = 16.3$  Hz), 124.0 (d,  $J_{\text{C-P}} = 11.3$  Hz), 122.5 (d,  $J_{\text{C-P}} = 12.2$  Hz), 120.6 (d,  $J_{\text{C-P}} = 6.7$  Hz), 33.1, 30.0 (d,  $J_{\text{C-P}} = 4.7$  Hz), 29.7 (d,  $J_{\text{C-P}} = 3.3$  Hz), 27.9;  $^{31}\text{P NMR}$  (162 MHz,  $\text{CDCl}_3$ )  $\delta$  38.1. HRMS (ESI):  $m/z$   $[\text{M}+\text{H}]^+$  calcd for  $\text{C}_{22}\text{H}_{22}\text{O}_2\text{PS}_2$ : 413.0793; found: 413.0787.

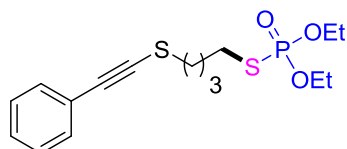

*O,O*-diethyl *S*-(4-((phenylethynyl)thio)butyl) phosphorothioate (**7aa**): TLC (PE/EtOAc, 3:1),  $R_f = 0.70$ ; Colorless liquid (89.3 mg, 83%).  $^1\text{H NMR}$  (400 MHz,  $\text{CDCl}_3$ )  $\delta$  7.44 - 7.27 (m, 5H), 4.26 - 4.06 (m, 4H), 2.96 - 2.77 (m, 4H), 1.92 - 1.91 (m, 4H), 1.37 - 1.35 (m, 6H);  $^{13}\text{C NMR}$  (101 MHz,  $\text{CDCl}_3$ )  $\delta$  131.6, 128.4, 128.2, 123.4, 93.4, 79.0, 63.7 (d,  $J_{\text{C-P}} = 5.9$  Hz), 35.1, 30.5 (d,  $J_{\text{C-P}} = 4.0$  Hz), 29.4 (d,  $J_{\text{C-P}} = 5.4$  Hz), 28.17, 16.2 (d,  $J_{\text{C-P}} = 7.2$  Hz);  $^{31}\text{P NMR}$  (162 MHz,  $\text{CDCl}_3$ )  $\delta$  27.9. HRMS (ESI):  $m/z$   $[\text{M}+\text{H}]^+$  calcd for  $\text{C}_{16}\text{H}_{24}\text{O}_3\text{PS}_2$ : 359.0899; found: 359.0902.

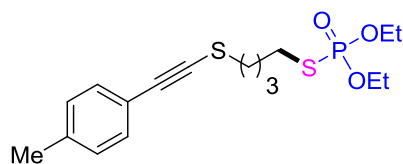

*O,O*-diethyl *S*-(4-((*p*-tolylethynyl)thio)butyl) phosphorothioate (**7ba**): TLC (PE/EtOAc, 3:1),  $R_f = 0.73$ ; Colorless liquid (88.3 mg, 79%).  $^1\text{H NMR}$  (400 MHz,  $\text{CDCl}_3$ )  $\delta$  7.31 (d,  $J = 7.8$  Hz, 2H), 7.10 (d,  $J = 7.8$  Hz, 2H), 4.23 - 4.11 (m, 4H), 2.93 - 2.85 (m, 2H), 2.80 (t,  $J = 6.5$  Hz, 2H), 2.34 (s, 3H), 1.95 - 1.85 (m, 4H), 1.36 (t,  $J = 7.0$  Hz, 6H);  $^{13}\text{C NMR}$  (101 MHz,  $\text{CDCl}_3$ )  $\delta$  138.5, 131.6, 129.2, 120.4, 93.5, 78.0, 63.7 (d,  $J_{\text{C-P}} = 6.0$  Hz), 35.1, 30.5 (d,  $J_{\text{C-P}} = 4.0$  Hz), 29.4 (d,  $J_{\text{C-P}} = 5.4$  Hz), 28.2, 21.6, 16.2 (d,  $J_{\text{C-P}} = 7.3$  Hz);  $^{31}\text{P NMR}$  (162 MHz,  $\text{CDCl}_3$ )  $\delta$  27.9. HRMS (ESI):  $m/z$   $[\text{M}+\text{H}]^+$  calcd for  $\text{C}_{17}\text{H}_{26}\text{O}_3\text{PS}_2$ : 373.1055; found: 373.1059.

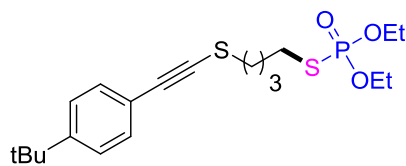

*S*-(4-(((4-*tert*-butyl)phenyl)ethynyl)thio)butyl *O,O*-diethyl phosphorothioate (**7ca**): TLC (PE/EtOAc, 3:1),  $R_f = 0.59$ ; Colorless liquid (101.9 mg, 82%).  $^1\text{H NMR}$  (400 MHz,  $\text{CDCl}_3$ )  $\delta$  7.36 - 7.26 (m, 4H), 4.23 - 4.07 (m, 4H), 2.92 - 2.84 (m, 2H), 2.80 - 2.79 (m, 2H), 1.90 - 1.83 (m, 4H), 1.38 - 1.32 (m, 6H), 1.30-1.29 (m, 9H);  $^{13}\text{C NMR}$  (101 MHz,  $\text{CDCl}_3$ )  $\delta$  151.6, 131.5, 125.4, 120.4, 93.4, 78.0, 63.7 (d,  $J_{\text{C-P}} = 6.0$  Hz), 35.1, 34.9, 31.3, 30.5 (d,  $J_{\text{C-P}} = 4.0$  Hz), 29.4 (d,  $J_{\text{C-P}} = 5.4$  Hz), 28.1, 16.2 (d,  $J_{\text{C-P}} = 7.3$  Hz);  $^{31}\text{P NMR}$  (162 MHz,  $\text{CDCl}_3$ )  $\delta$  27.9. HRMS (ESI):  $m/z$   $[\text{M}+\text{H}]^+$  calcd for  $\text{C}_{20}\text{H}_{32}\text{O}_3\text{PS}_2$ : 415.1525; found: 415.1527.

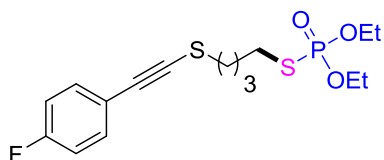

*O,O*-diethyl *S*-(4-(((4-fluorophenyl)ethynyl)thio)butyl) phosphorothioate (**7da**): TLC (PE/EtOAc, 3:1),  $R_f = 0.50$ ; Colorless liquid (86.9 mg, 77%).  $^1\text{H}$  NMR (400 MHz,  $\text{CDCl}_3$ )  $\delta$  7.40 - 7.39 (m, 2H), 7.02 - 6.98 (m, 2H), 4.23 - 4.09 (m, 4H), 2.93 - 2.88 (m, 2H), 2.82 - 2.77 (m, 2H), 1.91 (d,  $J = 2.2$  Hz, 4H), 1.38 - 1.34 (m, 6H);  $^{13}\text{C}$  NMR (101 MHz,  $\text{CDCl}_3$ )  $\delta$  162.4 (d,  $J_{\text{C-F}} = 248.1$  Hz), 133.6 (d,  $J_{\text{C-F}} = 8.3$  Hz), 119.4 (d,  $J_{\text{C-F}} = 3.6$  Hz), 115.6 (d,  $J_{\text{C-F}} = 22.0$  Hz), 92.1, 78.6, 63.6 (d,  $J_{\text{C-P}} = 6.0$  Hz), 35.0, 30.4 (d,  $J_{\text{C-P}} = 3.9$  Hz), 29.3 (d,  $J_{\text{C-P}} = 5.3$  Hz), 28.1, 16.1 (d,  $J_{\text{C-P}} = 7.2$  Hz);  $^{19}\text{F}$  NMR (376 MHz,  $\text{CDCl}_3$ )  $\delta$  -110.78; -110.79;  $^{31}\text{P}$  NMR (162 MHz,  $\text{CDCl}_3$ )  $\delta$  27.9. HRMS (ESI):  $m/z$   $[\text{M}+\text{H}]^+$  calcd for  $\text{C}_{16}\text{H}_{23}\text{FO}_3\text{PS}_2$ : 377.0805; found: 377.0802.

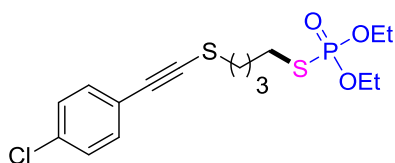

*S*-(4-(((4-chlorophenyl)ethynyl)thio)butyl) *O,O*-diethyl phosphorothioate (**7ea**): TLC (PE/EtOAc, 3:1),  $R_f = 0.50$ ; Colorless liquid (91.9 mg, 78%).  $^1\text{H}$  NMR (400 MHz,  $\text{CDCl}_3$ )  $\delta$  7.33 (d,  $J = 8.4$  Hz, 2H), 7.27 (d,  $J = 6.0$  Hz, 2H), 4.27 - 4.04 (m, 4H), 2.94 - 2.85 (m, 2H), 2.82 (t,  $J = 6.4$  Hz, 2H), 1.99 - 1.84 (m, 4H), 1.36 (t,  $J = 7.0$  Hz, 6H);  $^{13}\text{C}$  NMR (101 MHz,  $\text{CDCl}_3$ )  $\delta$  134.2, 132.8, 128.8, 122.0, 92.3, 80.4, 63.8 (d,  $J_{\text{C-P}} = 6.1$  Hz), 35.1, 30.5 (d,  $J_{\text{C-P}} = 4.0$  Hz), 29.4 (d,  $J_{\text{C-P}} = 5.3$  Hz), 28.2, 16.2 (d,  $J_{\text{C-P}} = 7.2$  Hz);  $^{31}\text{P}$  NMR (162 MHz,  $\text{CDCl}_3$ )  $\delta$  27.8. HRMS (ESI):  $m/z$   $[\text{M}+\text{H}]^+$  calcd for  $\text{C}_{16}\text{H}_{23}\text{ClO}_3\text{PS}_2$ : 393.0509; found: 393.0511.

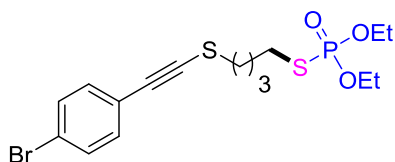

*S*-(4-(((4-bromophenyl)ethynyl)thio)butyl) *O,O*-diethyl phosphorothioate (**7fa**): TLC (PE/EtOAc, 3:1),  $R_f = 0.33$ ; Colorless liquid (94.5 mg, 72%).  $^1\text{H}$  NMR (400 MHz,  $\text{CDCl}_3$ )  $\delta$  7.47 - 7.39 (m, 2H), 7.30 - 7.24 (m, 2H), 4.29 - 4.07 (m, 4H), 2.98 - 2.76 (m, 4H), 2.01 - 1.83 (m, 4H), 1.39 - 1.34 (m, 6H);  $^{13}\text{C}$  NMR (101 MHz,  $\text{CDCl}_3$ )  $\delta$  132.9, 131.7, 122.4, 122.4, 92.4, 80.6, 63.7 (d,  $J_{\text{C-P}} = 6.1$  Hz), 35.1, 30.5 (d,  $J_{\text{C-P}} = 4.0$  Hz), 29.4 (d,  $J_{\text{C-P}} = 5.3$  Hz), 28.2, 16.2 (d,  $J_{\text{C-P}} = 7.3$  Hz);  $^{31}\text{P}$  NMR (162 MHz,  $\text{CDCl}_3$ )  $\delta$  27.8. HRMS (ESI):  $m/z$   $[\text{M}+\text{H}]^+$  calcd for  $\text{C}_{16}\text{H}_{23}\text{BrO}_3\text{PS}_2$ : 437.0004; found: 437.0009.

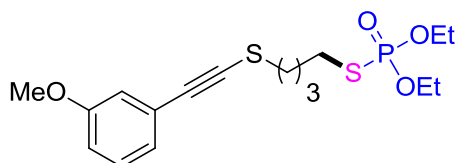

*O,O*-diethyl *S*-(4-(((3-methoxyphenyl)ethynyl)thio)butyl) phosphorothioate (**7ga**): TLC (PE/EtOAc, 3:1),  $R_f = 0.46$ ; Colorless liquid (74.6 mg, 64%).  $^1\text{H}$  NMR (400 MHz,  $\text{CDCl}_3$ )  $\delta$  7.22 - 7.18 (m, 1H), 7.00 (d,  $J = 7.6$  Hz, 1H), 6.94 (s, 1H), 6.85 (dd,  $J = 8.3, 1.8$  Hz, 1H), 4.22 - 4.11 (m, 4H), 3.80 (s, 3H), 2.93 - 2.86 (m, 2H), 2.82 (t,  $J = 6.6$  Hz, 2H), 1.97 - 1.87 (m, 4H), 1.36 (t,  $J = 7.1$  Hz, 6H);  $^{13}\text{C}$  NMR (101 MHz,  $\text{CDCl}_3$ )  $\delta$  159.4, 129.5, 124.4, 124.1, 116.3, 114.9, 93.3, 79.0, 63.7 (d,  $J_{\text{C-P}} = 6.1$  Hz), 55.4,

35.1, 30.5 (d,  $J_{C-P} = 3.9$  Hz), 29.4 (d,  $J_{C-P} = 5.4$  Hz), 28.2, 16.2 (d,  $J_{C-P} = 7.2$  Hz);  $^{31}\text{P}$  NMR (162 MHz,  $\text{CDCl}_3$ )  $\delta$  27.8. HRMS (ESI):  $m/z$   $[\text{M}+\text{H}]^+$  calcd for  $\text{C}_{17}\text{H}_{26}\text{O}_4\text{PS}_2$ : 389.1005; found: 389.1001.

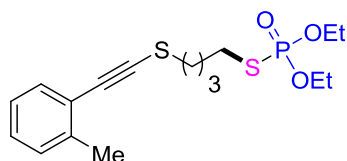

*O,O*-diethyl *S*-(4-((*o*-tolylethynyl)thio)butyl) phosphorothioate (**7ha**): TLC (PE/EtOAc, 3:1),  $R_f = 0.55$ ; Colorless liquid (79.3 mg, 71%);  $^1\text{H}$  NMR (400 MHz,  $\text{CDCl}_3$ )  $\delta$  7.37 (d,  $J = 7.5$  Hz, 1H), 7.19 (d,  $J = 0.8$  Hz, 2H), 7.13 - 7.12 (m, 1H), 4.23 - 4.09 (m, 4H), 2.93 - 2.86 (m, 2H), 2.82 (t,  $J = 6.2$  Hz, 2H), 2.42 (s, 3H), 1.98 - 1.87 (m, 4H), 1.36 (t,  $J = 7.0$  Hz, 6H);  $^{13}\text{C}$  NMR (101 MHz,  $\text{CDCl}_3$ )  $\delta$  140.1, 131.8, 129.5, 128.2, 125.7, 123.3, 92.4, 82.6, 63.7 (d,  $J_{C-P} = 6.0$  Hz), 35.3, 30.5 (d,  $J_{C-P} = 4.0$  Hz), 29.4 (d,  $J_{C-P} = 5.5$  Hz), 28.2, 20.9, 16.2 (d,  $J_{C-P} = 7.3$  Hz);  $^{31}\text{P}$  NMR (162 MHz,  $\text{CDCl}_3$ )  $\delta$  27.9. HRMS (ESI):  $m/z$   $[\text{M}+\text{H}]^+$  calcd for  $\text{C}_{17}\text{H}_{26}\text{O}_3\text{PS}_2$ : 373.1055; found: 373.1057.

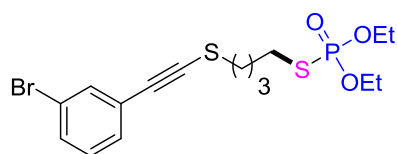

*S*-(4-(((3-bromophenyl)ethynyl)thio)butyl) *O,O*-diethyl phosphorothioate (**7ia**): TLC (PE/EtOAc, 3:1),  $R_f = 0.58$ ; Colorless liquid (95.8 mg, 73%).  $^1\text{H}$  NMR (400 MHz,  $\text{CDCl}_3$ )  $\delta$  7.55 (s, 1H), 7.42 (d,  $J = 8.0$  Hz, 1H), 7.32 (d,  $J = 7.7$  Hz, 1H), 7.19 - 7.15 (m, 1H), 4.22 - 4.07 (m, 4H), 2.94 - 2.85 (m, 2H), 2.82 (t,  $J = 6.5$  Hz, 2H), 1.93 - 1.85 (m, 4H), 1.36 (t,  $J = 7.0$  Hz, 6H);  $^{13}\text{C}$  NMR (101 MHz,  $\text{CDCl}_3$ )  $\delta$  166.3, 134.1, 131.3, 130.0, 129.9, 125.5, 122.2, 91.9, 81.1, 63.8 (d,  $J_{C-P} = 6.1$  Hz), 35.1, 30.5 (d,  $J_{C-P} = 4.1$  Hz), 29.4 (d,  $J_{C-P} = 5.5$  Hz), 28.2, 16.2 (d,  $J_{C-P} = 7.2$  Hz);  $^{31}\text{P}$  NMR (162 MHz,  $\text{CDCl}_3$ )  $\delta$  27.8. HRMS (ESI):  $m/z$   $[\text{M}+\text{H}]^+$  calcd for  $\text{C}_{16}\text{H}_{23}\text{BrO}_3\text{PS}_2$ : 437.0004; found: 437.0007.

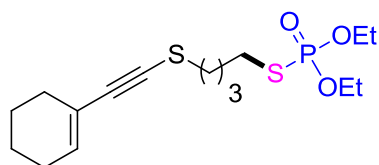

*S*-(4-((cyclohex-1-en-1-ylethynyl)thio)butyl) *O,O*-diethyl phosphorothioate (**7ja**): TLC (PE/EtOAc, 3:1),  $R_f = 0.72$ ; Colorless liquid (40.2 mg, 37%).  $^1\text{H}$  NMR (400 MHz,  $\text{CDCl}_3$ )  $\delta$  6.08 (s, 1H), 4.23 - 4.09 (m, 4H), 2.92 - 2.79 (m, 2H), 2.71 (t,  $J = 5.9$  Hz, 2H), 2.18 - 1.99 (m, 4H), 1.91 - 1.78 (m, 4H), 1.63 - 1.51 (m, 4H), 1.36 (t,  $J = 7.0$  Hz, 6H);  $^{13}\text{C}$  NMR (101 MHz,  $\text{CDCl}_3$ )  $\delta$  134.9, 120.8, 95.2, 75.4, 63.6 (d,  $J_{C-P} = 6.1$  Hz), 35.0, 30.4 (d,  $J_{C-P} = 3.9$  Hz), 29.3 (d,  $J_{C-P} = 5.4$  Hz), 29.2, 27.9, 25.6, 22.3, 21.4, 16.1 (d,  $J_{C-P} = 7.3$  Hz);  $^{31}\text{P}$  NMR (162 MHz,  $\text{CDCl}_3$ )  $\delta$  27.91. HRMS (ESI):  $m/z$   $[\text{M}+\text{H}]^+$  calcd for  $\text{C}_{16}\text{H}_{28}\text{O}_3\text{PS}_2$ : 363.1212; found: 363.1214.

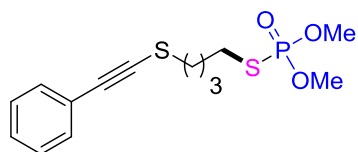

*O,O*-dimethyl *S*-(4-((phenylethynyl)thio)butyl) phosphorothioate (**7ab**): TLC (PE/EtOAc, 3:1),  $R_f = 0.29$ ; Colorless liquid (81.2 mg, 82%).  $^1\text{H}$  NMR (400 MHz,  $\text{CDCl}_3$ )  $\delta$  7.41 (d,  $J = 3.0$  Hz, 2H), 7.33 - 7.26 (m, 3H), 3.85 - 3.79 (m, 3H), 3.79 - 3.74 (m, 3H), 2.94 - 2.85 (m, 2H), 2.83 - 2.80 (m, 2H), 1.99 - 1.86 (m, 4H);  $^{13}\text{C}$  NMR (101 MHz,  $\text{CDCl}_3$ )  $\delta$  131.6, 128.4, 128.2, 123.4, 93.4, 79.0, 54.0 (d,  $J_{C-P} = 6.0$

(Hz), 53.9, 35.1, 30.5 (d,  $J_{C-P} = 4.0$  Hz), 29.4 (d,  $J_{C-P} = 5.2$  Hz), 28.2;  $^{31}\text{P}$  NMR (162 MHz,  $\text{CDCl}_3$ )  $\delta$  31.4. HRMS (ESI):  $m/z$   $[\text{M}+\text{H}]^+$  calcd for  $\text{C}_{14}\text{H}_{20}\text{O}_3\text{PS}_2$ : 331.0586; found: 331.0588.

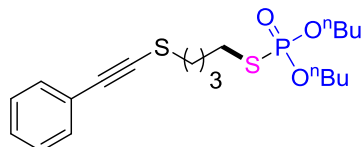

*O,O*-dibutyl *S*-(4-((phenylethynyl)thio)butyl) phosphorothioate (**7ac**): TLC (PE/EtOAc, 3:1),  $R_f = 0.38$ ; Colorless liquid (98.3 mg, 79%).  $^1\text{H}$  NMR (400 MHz,  $\text{CDCl}_3$ )  $\delta$  7.41 (d,  $J = 4.0$  Hz, 2H), 7.30 - 7.27 (m, 3H), 4.15 - 4.02 (m, 4H), 2.94 - 2.84 (m, 2H), 2.81 (t,  $J = 6.5$  Hz, 2H), 1.97 - 1.85 (m, 4H), 1.72 - 1.63 (m, 4H), 1.47 - 1.34 (m, 4H), 0.93 (t,  $J = 7.4$  Hz, 6H);  $^{13}\text{C}$  NMR (101 MHz,  $\text{CDCl}_3$ )  $\delta$  131.6, 128.4, 128.2, 123.5, 93.4, 79.0, 67.4 (d,  $J_{C-P} = 6.5$  Hz), 35.1, 32.3 (d,  $J_{C-P} = 7.3$  Hz), 30.4 (d,  $J_{C-P} = 3.9$  Hz), 29.4 (d,  $J_{C-P} = 5.5$  Hz), 28.2, 18.9, 13.7;  $^{31}\text{P}$  NMR (162 MHz,  $\text{CDCl}_3$ )  $\delta$  28.01. HRMS (ESI):  $m/z$   $[\text{M}+\text{H}]^+$  calcd for  $\text{C}_{20}\text{H}_{32}\text{O}_3\text{PS}_2$ : 415.1525; found: 415.1528.

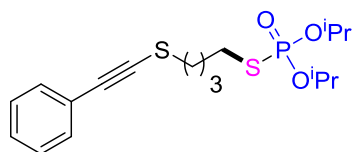

*O,O*-diisopropyl *S*-(4-((phenylethynyl)thio)butyl) phosphorothioate (**7ad**): TLC (PE/EtOAc, 3:1),  $R_f = 0.47$ ; Colorless liquid (88.1 mg, 76%).  $^1\text{H}$  NMR (400 MHz,  $\text{CDCl}_3$ )  $\delta$  7.42 - 7.40 (m, 2H), 7.30 - 7.27 (m, 3H), 4.80 - 4.60 (m, 2H), 2.93 - 2.86 (m, 2H), 2.82 (t,  $J = 6.5$  Hz, 2H), 1.98 - 1.84 (m, 4H), 1.37 - 1.34 (m, 12H);  $^{13}\text{C}$  NMR (101 MHz,  $\text{CDCl}_3$ )  $\delta$  131.6, 128.4, 128.2, 123.5, 93.4, 79.1, 72.8 (d,  $J_{C-P} = 6.5$  Hz), 35.1, 30.6 (d,  $J_{C-P} = 3.9$  Hz), 29.3 (d,  $J_{C-P} = 6.0$  Hz), 28.3, 24.0 (d,  $J_{C-P} = 4.1$  Hz), 23.8 (d,  $J_{C-P} = 5.5$  Hz);  $^{31}\text{P}$  NMR (162 MHz,  $\text{CDCl}_3$ )  $\delta$  25.3. HRMS (ESI):  $m/z$   $[\text{M}+\text{H}]^+$  calcd for  $\text{C}_{18}\text{H}_{28}\text{O}_3\text{PS}_2$ : 387.1212; found: 387.1217.

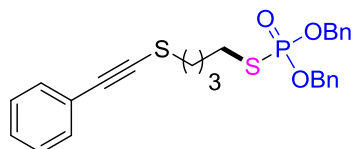

*O,O*-dibenzyl *S*-(4-((phenylethynyl)thio)butyl) phosphorothioate (**7ae**): TLC (PE/EtOAc, 3:1),  $R_f = 0.36$ ; Colorless liquid (111.5 mg, 77%).  $^1\text{H}$  NMR (400 MHz,  $\text{CDCl}_3$ )  $\delta$  7.42 - 7.26 (m, 15H), 5.18 - 5.04 (m, 4H), 2.86 - 2.74 (m, 2H), 2.69 (t,  $J = 6.0$  Hz, 2H), 1.87 - 1.76 (m, 4H);  $^{13}\text{C}$  NMR (101 MHz,  $\text{CDCl}_3$ )  $\delta$  135.6 (d,  $J_{C-P} = 7.5$  Hz), 131.6, 129.0, 128.7, 128.7, 128.4, 128.2, 123.4, 93.4, 79.0, 69.1 (d,  $J_{C-P} = 6.0$  Hz), 35.0, 30.5 (d,  $J_{C-P} = 3.9$  Hz), 29.2 (d,  $J_{C-P} = 5.7$  Hz), 28.1;  $^{31}\text{P}$  NMR (162 MHz,  $\text{CDCl}_3$ )  $\delta$  28.9. HRMS (ESI):  $m/z$   $[\text{M}+\text{H}]^+$  calcd for  $\text{C}_{26}\text{H}_{28}\text{O}_3\text{PS}_2$ : 483.1212; found: 483.1209.

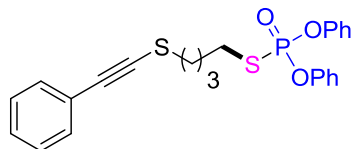

*O,O*-diphenyl *S*-(4-((phenylethynyl)thio)butyl) phosphorothioate (**7af**): TLC (PE/EtOAc, 3:1),  $R_f = 0.67$ ; Colorless liquid (87.3 mg, 64%).  $^1\text{H}$  NMR (400 MHz,  $\text{CDCl}_3$ )  $\delta$  7.44 - 7.18 (m, 15H), 3.01 - 2.96 (m, 2H), 2.69 (t,  $J = 5.2$  Hz, 2H), 1.80 - 1.79 (m, 4H);  $^{13}\text{C}$  NMR (101 MHz,  $\text{CDCl}_3$ )  $\delta$  150.2 (d,  $J_{C-P} = 8.1$  Hz), 131.6, 130.0, 129.7, 128.4, 128.2, 125.8, 123.4, 120.9 (d,  $J_{C-P} = 4.9$  Hz), 120.4, 120.3 (d,  $J_{C-P} = 5.0$  Hz), 115.5, 93.4, 79.0, 34.9, 31.4 (d,  $J_{C-P} = 4.2$  Hz), 29.2 (d,  $J_{C-P} = 5.6$  Hz), 27.9;  $^{31}\text{P}$  NMR (162 MHz,  $\text{CDCl}_3$ )  $\delta$  21.4. HRMS (ESI):  $m/z$   $[\text{M}+\text{H}]^+$  calcd for  $\text{C}_{24}\text{H}_{24}\text{O}_3\text{PS}_2$ : 455.0899; found: 455.0905.

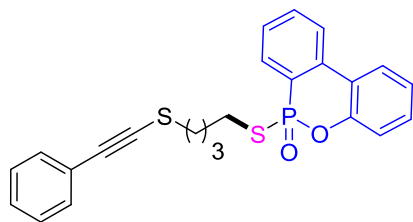

6-((4-((phenylethynyl)thio)butyl)thio)dibenzo[*c,e*][1,2]oxaphosphinine 6-oxide (**7ag**): TLC (PE/EtOAc, 3:1),  $R_f = 0.35$ ; Colorless liquid (79.9 mg, 61%).  $^1\text{H}$  NMR (400 MHz,  $\text{CDCl}_3$ )  $\delta$  8.04 - 7.90 (m, 3H), 7.73 - 7.69 (m, 1H), 7.55 - 7.51 (m, 1H), 7.41 - 7.37 (m, 3H), 7.32 - 7.24 (m, 5H), 3.03 - 2.82 (m, 2H), 2.77 - 2.74 (m, 2H), 1.91 - 1.86 (m, 2H), 1.71 - 1.66 (m, 2H);  $^{13}\text{C}$  NMR (101 MHz,  $\text{CDCl}_3$ )  $\delta$  149.6 (d,  $J_{\text{C-P}} = 9.4$  Hz), 136.2 (d,  $J_{\text{C-P}} = 7.5$  Hz), 134.0 (d,  $J_{\text{C-P}} = 2.5$  Hz), 131.6, 130.9, 130.6 (d,  $J_{\text{C-P}} = 10.9$  Hz), 128.8 (d,  $J_{\text{C-P}} = 14.9$  Hz), 128.4, 128.2, 126.6, 125.9 (d,  $J_{\text{C-P}} = 135.6$  Hz), 125.2 (d,  $J_{\text{C-P}} = 16.9$  Hz), 124.0 (d,  $J_{\text{C-P}} = 11.2$  Hz), 123.4, 122.4 (d,  $J_{\text{C-P}} = 12.1$  Hz), 120.6 (d,  $J_{\text{C-P}} = 6.7$  Hz), 93.4, 79.0, 35.0, 29.6 (d,  $J_{\text{C-P}} = 3.3$  Hz), 29.5 (d,  $J_{\text{C-P}} = 4.5$  Hz), 28.1;  $^{31}\text{P}$  NMR (162 MHz,  $\text{CDCl}_3$ )  $\delta$  38.1. HRMS (ESI):  $m/z$   $[\text{M}+\text{H}]^+$  calcd for  $\text{C}_{24}\text{H}_{22}\text{O}_2\text{PS}_2$ : 437.0793; found: 437.0796.

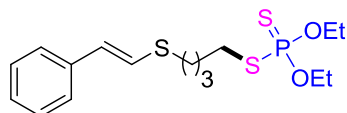

(*E*)-*O,O*-diethyl *S*-(4-(styrylthio)butyl) phosphorodithioate (**9a**): TLC (PE/EtOAc, 20:1),  $R_f = 0.60$ ; Colorless liquid (96.0 mg, 85%).  $^1\text{H}$  NMR (400 MHz,  $\text{CDCl}_3$ )  $\delta$  7.22 (d,  $J = 4.2$  Hz, 4H), 7.15 - 7.10 (m, 1H), 6.62 (d,  $J = 15.6$  Hz, 1H), 6.40 (d,  $J = 15.6$  Hz, 1H), 4.19 - 3.99 (m, 4H), 2.88 - 2.78 (m, 2H), 2.74 (t,  $J = 6.4$  Hz, 2H), 1.75 - 1.74 (m, 4H), 1.28 (t,  $J = 7.1$  Hz, 6H);  $^{13}\text{C}$  NMR (101 MHz,  $\text{CDCl}_3$ )  $\delta$  137.0, 128.7, 127.5, 127.0, 125.6, 124.7, 64.0 (d,  $J_{\text{C-P}} = 6.0$  Hz), 33.2 (d,  $J_{\text{C-P}} = 3.9$  Hz), 32.07, 29.4 (d,  $J_{\text{C-P}} = 5.3$  Hz), 28.3, 16.0 (d,  $J_{\text{C-P}} = 8.4$  Hz);  $^{31}\text{P}$  NMR (162 MHz,  $\text{CDCl}_3$ )  $\delta$  95.0. HRMS (ESI):  $m/z$   $[\text{M}+\text{H}]^+$  calcd for  $\text{C}_{16}\text{H}_{26}\text{O}_2\text{PS}_3$ : 377.0827; found: 377.0829.

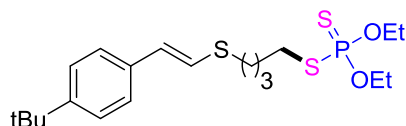

(*E*)-*S*-(4-((4-(*tert*-butyl)styryl)thio)butyl) *O,O*-diethyl phosphorodithioate (**9b**): TLC (PE/EtOAc, 20:1),  $R_f = 0.55$ ; Colorless liquid (101.2 mg, 78%).  $^1\text{H}$  NMR (400 MHz,  $\text{CDCl}_3$ )  $\delta$  7.32 (d,  $J = 8.2$  Hz, 2H), 7.25 - 7.22 (m, 2H), 6.64 (d,  $J = 15.5$  Hz, 1H), 6.48 (d,  $J = 15.5$  Hz, 1H), 4.26 - 4.06 (m, 4H), 2.95 - 2.85 (m, 2H), 2.80 (t,  $J = 6.4$  Hz, 2H), 1.89 - 1.81 (m, 4H), 1.36 (t,  $J = 7.0$  Hz, 6H), 1.31 (s, 9H);  $^{13}\text{C}$  NMR (101 MHz,  $\text{CDCl}_3$ )  $\delta$  150.2, 134.3, 127.8, 125.7, 125.4, 123.7, 64.1 (d,  $J_{\text{C-P}} = 6.0$  Hz), 34.6, 33.2 (d,  $J_{\text{C-P}} = 3.9$  Hz), 32.2, 31.4, 29.5 (d,  $J_{\text{C-P}} = 5.3$  Hz), 28.4, 16.0 (d,  $J_{\text{C-P}} = 8.3$  Hz);  $^{31}\text{P}$  NMR (162 MHz,  $\text{CDCl}_3$ )  $\delta$  95.0. HRMS (ESI):  $m/z$   $[\text{M}+\text{H}]^+$  calcd for  $\text{C}_{20}\text{H}_{34}\text{O}_2\text{PS}_3$ : 433.1453; found: 433.1457.

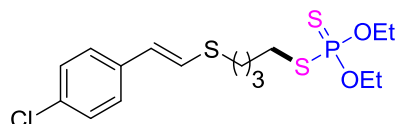

(*E*)-*S*-(4-((4-chlorostyryl)thio)butyl) *O,O*-diethyl phosphorodithioate (**9c**): TLC (PE/EtOAc, 20:1),  $R_f = 0.50$ ; Colorless liquid (93.7 mg, 76%).  $^1\text{H}$  NMR (400 MHz,  $\text{CDCl}_3$ )  $\delta$  7.28 - 7.16 (m, 4H), 6.68 (dd,  $J = 15.6, 3.0$  Hz, 1H), 6.40 (dd,  $J = 15.6, 2.9$  Hz, 1H), 4.25 - 4.04 (m, 4H), 2.95 - 2.85 (m, 2H), 2.81 - 2.80 (m, 2H), 1.89 - 1.81 (m, 4H), 1.40 - 1.27 (m, 6H);  $^{13}\text{C}$  NMR (101 MHz,  $\text{CDCl}_3$ )  $\delta$  135.5, 132.4, 128.8,

126.7, 125.8, 125.8, 64.0 (d,  $J_{C-P}$  = 6.1 Hz), 33.1 (d,  $J_{C-P}$  = 3.8 Hz), 32.0, 29.4 (d,  $J_{C-P}$  = 5.2 Hz), 28.3, 16.0 (d,  $J_{C-P}$  = 8.3 Hz);  $^{31}\text{P}$  NMR (162 MHz,  $\text{CDCl}_3$ )  $\delta$  95.0. HRMS (ESI):  $m/z$   $[\text{M}+\text{H}]^+$  calcd for  $\text{C}_{16}\text{H}_{25}\text{ClO}_2\text{PS}_3$ : 411.0437; found: 411.0438.

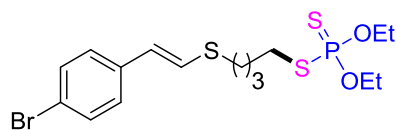

(*E*)-*S*-(4-((4-bromostyryl)thio)butyl) *O,O*-diethyl phosphorodithioate (**9d**): TLC (PE/EtOAc, 20:1),  $R_f$  = 0.50; Colorless liquid (112.0 mg, 82%).  $^1\text{H}$  NMR (400 MHz,  $\text{CDCl}_3$ )  $\delta$  7.39 (dd,  $J$  = 8.3, 2.1 Hz, 2H), 7.17 - 7.09 (m, 2H), 6.70 (dd,  $J$  = 15.6, 2.2 Hz, 1H), 6.38 (dd,  $J$  = 16.0 Hz,  $J$  = 4.0 Hz, 1H), 4.23 - 4.08 (m, 4H), 2.92 - 2.87 (m, 2H), 2.81 - 2.73 (m, 2H), 1.89 - 1.81 (m, 4H), 1.39 - 1.31 (m, 6H);  $^{13}\text{C}$  NMR (101 MHz,  $\text{CDCl}_3$ )  $\delta$  135.9, 131.7, 127.0, 125.9, 125.7, 120.5, 64.0 (d,  $J_{C-P}$  = 6.1 Hz), 33.1 (d,  $J_{C-P}$  = 3.8 Hz), 32.0, 29.4 (d,  $J_{C-P}$  = 5.3 Hz), 28.2, 16.0 (d,  $J_{C-P}$  = 8.3 Hz);  $^{31}\text{P}$  NMR (162 MHz,  $\text{CDCl}_3$ )  $\delta$  95.0. HRMS (ESI):  $m/z$   $[\text{M}+\text{H}]^+$  calcd for  $\text{C}_{16}\text{H}_{25}\text{BrO}_2\text{PS}_3$ : 454.9932; found: 454.9934.

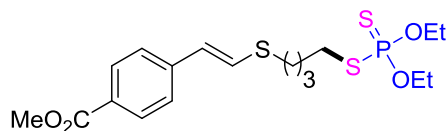

methyl (*E*)-4-(2-((4-((diethoxyphosphorothioyl)thio)butyl)thio)vinyl)benzoate (**9e**): TLC (PE/EtOAc, 20:1),  $R_f$  = 0.23; Colorless liquid (92.6 mg, 71%).  $^1\text{H}$  NMR (400 MHz,  $\text{CDCl}_3$ )  $\delta$  7.95 (d,  $J$  = 8.2 Hz, 2H), 7.33 (d,  $J$  = 8.2 Hz, 2H), 6.88 (d,  $J$  = 15.6 Hz, 1H), 6.45 (d,  $J$  = 15.6 Hz, 1H), 4.25 - 4.04 (m, 4H), 3.90 (s, 3H), 3.01 - 2.77 (m, 4H), 1.92 - 1.77 (m, 4H), 1.36 (t,  $J$  = 7.1 Hz, 6H);  $^{13}\text{C}$  NMR (101 MHz,  $\text{CDCl}_3$ )  $\delta$  167.0, 141.4, 130.1, 128.6, 128.2, 125.4, 125.3, 64.1 (d,  $J_{C-P}$  = 6.1 Hz), 52.1, 33.2 (d,  $J_{C-P}$  = 3.9 Hz), 31.93, 29.5 (d,  $J_{C-P}$  = 5.2 Hz), 28.2, 16.0 (d,  $J_{C-P}$  = 8.3 Hz);  $^{31}\text{P}$  NMR (162 MHz,  $\text{CDCl}_3$ )  $\delta$  95.1. HRMS (ESI):  $m/z$   $[\text{M}+\text{H}]^+$  calcd for  $\text{C}_{18}\text{H}_{28}\text{O}_4\text{PS}_3$ : 435.0882; found: 435.0880.

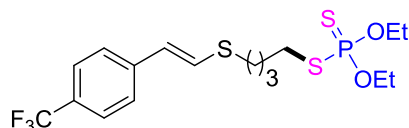

(*E*)-*O,O*-diethyl *S*-(4-((4-(trifluoromethyl)styryl)thio)butyl) phosphorodithioate (**9f**): TLC (PE/EtOAc, 20:1),  $R_f$  = 0.40; Colorless liquid (90.7 mg, 68%).  $^1\text{H}$  NMR (400 MHz,  $\text{CDCl}_3$ )  $\delta$  7.53 (d,  $J$  = 8.0 Hz, 2H), 7.37 (d,  $J$  = 8.0 Hz, 2H), 6.85 (d,  $J$  = 15.6 Hz, 1H), 6.45 (d,  $J$  = 15.6 Hz, 1H), 4.26 - 4.07 (m, 4H), 2.96 - 2.84 (m, 4H), 1.84 - 1.76 (m, 4H), 1.36 (t,  $J$  = 7.0 Hz, 6H);  $^{13}\text{C}$  NMR (101 MHz,  $\text{CDCl}_3$ )  $\delta$  140.5, 128.4, 128.3 (q,  $J_{C-F}$  = 32.3 Hz), 125.7 (q,  $J_{C-F}$  = 3.8 Hz), 125.6, 125.1, 121.7 (q,  $J_{C-F}$  = 272.6 Hz), 64.1 (d,  $J_{C-P}$  = 6.1 Hz), 33.2 (d,  $J_{C-P}$  = 3.8 Hz), 32.0, 29.5 (d,  $J_{C-P}$  = 5.2 Hz), 28.2, 16.0 (d,  $J_{C-P}$  = 8.2 Hz);  $^{31}\text{P}$  NMR (162 MHz,  $\text{CDCl}_3$ )  $\delta$  95.13. HRMS (ESI):  $m/z$   $[\text{M}+\text{H}]^+$  calcd for  $\text{C}_{17}\text{H}_{25}\text{F}_3\text{O}_2\text{PS}_3$ : 445.0701; found: 445.0706.

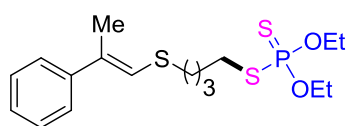

(*E*)-*O,O*-diethyl *S*-(4-((2-phenylprop-1-en-1-yl)thio)butyl) phosphorodithioate (**9g**): TLC (PE/EtOAc, 20:1),  $R_f$  = 0.59; Colorless liquid (97.3 mg, 83%).  $^1\text{H}$  NMR (400 MHz,  $\text{CDCl}_3$ )  $\delta$  7.35 - 7.28 (m, 4H), 7.22 (dd,  $J$  = 15.2, 8.2 Hz, 1H), 6.27 (s, 1H), 4.28 - 4.04 (m, 4H), 2.94 - 2.85 (m, 2H), 2.79 (t,  $J$  = 6.6

Hz, 2H), 2.12 (s, 3H), 1.84 - 1.80 (m, 4H), 1.35 (t,  $J = 7.1$  Hz, 6H);  $^{13}\text{C}$  NMR (101 MHz,  $\text{CDCl}_3$ )  $\delta$  142.0, 134.0, 128.4, 126.8, 125.2, 123.3, 64.0 (d,  $J_{\text{C-P}} = 6.0$  Hz), 33.6, 33.2 (d,  $J_{\text{C-P}} = 3.9$  Hz), 29.3 (d,  $J_{\text{C-P}} = 1.8$  Hz), 29.2, 17.7, 16.0 (d,  $J_{\text{C-P}} = 8.3$  Hz);  $^{31}\text{P}$  NMR (162 MHz,  $\text{CDCl}_3$ )  $\delta$  95.0. HRMS (ESI):  $m/z$   $[\text{M}+\text{H}]^+$  calcd for  $\text{C}_{17}\text{H}_{28}\text{O}_2\text{PS}_3$ : 391.0984; found: 391.0987.

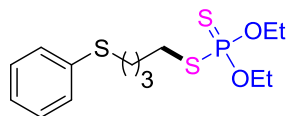

*O,O*-diethyl *S*-(4-(phenylthio)butyl) phosphorodithioate (**9h**): TLC (PE/EtOAc, 20:1),  $R_f = 0.55$ ; Colorless liquid (87.3 mg, 83%).  $^1\text{H}$  NMR (400 MHz,  $\text{CDCl}_3$ )  $\delta$  7.28 - 7.18 (m, 4H), 7.13 - 7.09 (m, 1H), 4.29 - 3.97 (m, 4H), 2.90 - 2.76 (m, 4H), 1.80 - 1.63 (m, 4H), 1.35 - 1.26 (m, 6H);  $^{13}\text{C}$  NMR (101 MHz,  $\text{CDCl}_3$ )  $\delta$  136.4, 129.4, 129.0, 126.1, 64.0 (d,  $J_{\text{C-P}} = 6.0$  Hz), 33.3 (d,  $J_{\text{C-P}} = 4.8$  Hz), 29.5 (d,  $J_{\text{C-P}} = 5.3$  Hz), 28.1, 16.0 (d,  $J_{\text{C-P}} = 8.4$  Hz);  $^{31}\text{P}$  NMR (162 MHz,  $\text{CDCl}_3$ )  $\delta$  95.0. HRMS (ESI):  $m/z$   $[\text{M}+\text{H}]^+$  calcd for  $\text{C}_{14}\text{H}_{24}\text{O}_2\text{PS}_3$ : 351.0671; found: 351.0673.

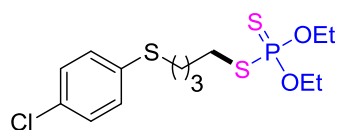

*S*-(4-(4-chlorophenylthio)butyl) *O,O*-diethyl phosphorodithioate (**9i**): TLC (PE/EtOAc, 20:1),  $R_f = 0.50$ ; Colorless liquid (85.5 mg, 74%).  $^1\text{H}$  NMR (400 MHz,  $\text{CDCl}_3$ )  $\delta$  7.27 - 7.25 (m, 4H), 4.29 - 4.05 (m, 4H), 2.99 - 2.77 (m, 4H), 1.83 - 1.73 (m, 4H), 1.43 - 1.31 (m, 6H);  $^{13}\text{C}$  NMR (101 MHz,  $\text{CDCl}_3$ )  $\delta$  134.9, 132.1, 130.8, 129.2, 64.1 (d,  $J_{\text{C-P}} = 6.0$  Hz), 33.5, 33.2 (d,  $J_{\text{C-P}} = 3.2$  Hz), 29.4 (d,  $J_{\text{C-P}} = 5.2$  Hz), 28.0, 16.0 (d,  $J_{\text{C-P}} = 8.3$  Hz);  $^{31}\text{P}$  NMR (162 MHz,  $\text{CDCl}_3$ )  $\delta$  95.1. HRMS (ESI):  $m/z$   $[\text{M}+\text{H}]^+$  calcd for  $\text{C}_{14}\text{H}_{23}\text{ClO}_2\text{PS}_3$ : 385.0281; found: 385.0285.

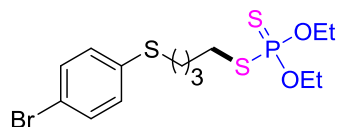

*S*-(4-(4-bromophenylthio)butyl) *O,O*-diethyl phosphorodithioate (**9j**): TLC (PE/EtOAc, 20:1),  $R_f = 0.56$ ; Colorless liquid (99.2 mg, 77%).  $^1\text{H}$  NMR (400 MHz,  $\text{CDCl}_3$ )  $\delta$  7.40 (d,  $J = 8.3$  Hz, 2H), 7.18 (d,  $J = 8.3$  Hz, 2H), 4.28 - 4.07 (m, 4H), 2.93 - 2.84 (m, 4H), 1.86 - 1.69 (m, 4H), 1.37 (d,  $J = 7.0$  Hz, 6H);  $^{13}\text{C}$  NMR (101 MHz,  $\text{CDCl}_3$ )  $\delta$  135.6, 132.1, 130.9, 119.9, 64.1 (d,  $J_{\text{C-P}} = 6.1$  Hz), 33.3, 33.2 (d,  $J_{\text{C-P}} = 3.9$  Hz), 29.4 (d,  $J_{\text{C-P}} = 5.3$  Hz), 27.9, 16.0 (d,  $J_{\text{C-P}} = 8.3$  Hz);  $^{31}\text{P}$  NMR (162 MHz,  $\text{CDCl}_3$ )  $\delta$  95.1. HRMS (ESI):  $m/z$   $[\text{M}+\text{H}]^+$  calcd for  $\text{C}_{14}\text{H}_{23}\text{BrO}_2\text{PS}_3$ : 428.9776; found: 428.9774.

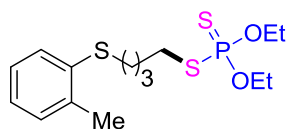

*O,O*-diethyl *S*-(4-(*o*-tolylthio)butyl) phosphorodithioate (**9k**): TLC (PE/EtOAc, 20:1),  $R_f = 0.50$ ; Colorless liquid (75.5 mg, 69%).  $^1\text{H}$  NMR (400 MHz,  $\text{CDCl}_3$ )  $\delta$  7.25 (d,  $J = 7.3$  Hz, 1H), 7.17 - 7.14 (m, 2H), 7.11 - 7.06 (m, 1H), 4.27 - 4.03 (m, 4H), 2.97 - 2.82 (m, 4H), 2.36 (s, 3H), 1.92 - 1.73 (m, 4H), 1.35 (t,  $J = 7.1$  Hz, 6H);  $^{13}\text{C}$  NMR (101 MHz,  $\text{CDCl}_3$ )  $\delta$  137.6, 135.8, 130.2, 127.9, 126.5, 125.8, 64.0 (d,  $J_{\text{C-P}} = 6.0$  Hz), 33.2 (d,  $J_{\text{C-P}} = 3.9$  Hz), 32.4, 29.6 (d,  $J_{\text{C-P}} = 5.3$  Hz), 27.9, 20.5, 16.0 (d,  $J_{\text{C-P}} = 8.3$  Hz);  $^{31}\text{P}$  NMR (162 MHz,  $\text{CDCl}_3$ )  $\delta$  95.0. HRMS (ESI):  $m/z$   $[\text{M}+\text{H}]^+$  calcd for  $\text{C}_{15}\text{H}_{26}\text{O}_2\text{PS}_3$ : 365.0827; found: 365.0833.

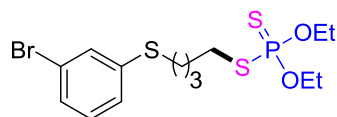

*S*-(4-((3-bromophenyl)thio)butyl) *O,O*-diethyl phosphorodithioate (**9l**): TLC (PE/EtOAc, 20:1),  $R_f = 0.60$ ; Colorless liquid (95.3 mg, 74%).  $^1\text{H}$  NMR (400 MHz,  $\text{CDCl}_3$ )  $\delta$  7.44 (s, 1H), 7.33 - 7.19 (m, 2H), 7.16 - 7.12 (m, 1H), 4.32 - 3.95 (m, 4H), 3.00 - 2.80 (m, 4H), 1.90 - 1.69 (m, 4H), 1.36 (t,  $J = 7.0$  Hz, 6H);  $^{13}\text{C}$  NMR (101 MHz,  $\text{CDCl}_3$ )  $\delta$  139.0, 131.3, 130.3, 129.0, 127.4, 122.9, 64.1 (d,  $J_{\text{C-P}} = 6.1$  Hz), 33.2 (d,  $J_{\text{C-P}} = 3.9$  Hz), 33.0, 29.5 (d,  $J_{\text{C-P}} = 5.3$  Hz), 27.8, 16.0 (d,  $J_{\text{C-P}} = 8.3$  Hz);  $^{31}\text{P}$  NMR (162 MHz,  $\text{CDCl}_3$ )  $\delta$  95.0. HRMS (ESI):  $m/z$   $[\text{M}+\text{H}]^+$  calcd for  $\text{C}_{14}\text{H}_{23}\text{BrO}_2\text{PS}_3$ : 428.9776; found: 428.9779.

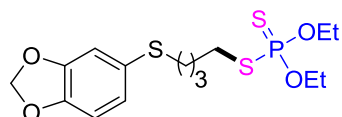

*S*-(4-(benzo[*d*][1,3]dioxol-5-ylthio)butyl) *O,O*-diethyl phosphorodithioate (**9m**): TLC (PE/EtOAc, 20:1),  $R_f = 0.25$ ; Colorless liquid (99.4 mg, 84%).  $^1\text{H}$  NMR (400 MHz,  $\text{CDCl}_3$ )  $\delta$  6.89 (d,  $J = 6.3$  Hz, 2H), 6.76 - 6.70 (m, 1H), 5.95 (s, 2H), 4.23 - 4.07 (m, 4H), 2.90 - 2.78 (m, 4H), 1.83 - 1.75 (m, 2H), 1.71 - 1.64 (m, 2H), 1.35 (t,  $J = 7.1$  Hz, 6H);  $^{13}\text{C}$  NMR (101 MHz,  $\text{CDCl}_3$ )  $\delta$  148.0, 147.1, 127.8, 125.4, 112.0, 108.7, 101.3, 63.9 (d,  $J_{\text{C-P}} = 6.0$  Hz), 35.25, 33.1 (d,  $J_{\text{C-P}} = 3.9$  Hz), 29.3 (d,  $J_{\text{C-P}} = 5.3$  Hz), 28.1, 15.9 (d,  $J_{\text{C-P}} = 8.3$  Hz);  $^{31}\text{P}$  NMR (162 MHz,  $\text{CDCl}_3$ )  $\delta$  95.0. HRMS (ESI):  $m/z$   $[\text{M}+\text{H}]^+$  calcd for  $\text{C}_{15}\text{H}_{24}\text{O}_4\text{PS}_3$ : 395.0569; found: 395.0565.

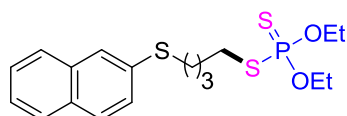

*O,O*-diethyl *S*-(4-(naphthalen-2-ylthio)butyl) phosphorodithioate (**9n**): TLC (PE/EtOAc, 20:1),  $R_f = 0.55$ ; Colorless liquid (93.7 mg, 78%).  $^1\text{H}$  NMR (400 MHz,  $\text{CDCl}_3$ )  $\delta$  7.78 - 7.73 (m, 4H), 7.50 - 7.36 (m, 3H), 4.23 - 4.05 (m, 4H), 3.02 (t,  $J = 6.6$  Hz, 2H), 2.93 - 2.79 (m, 2H), 1.88 - 1.75 (m, 4H), 1.33 (t,  $J = 7.0$  Hz, 6H);  $^{13}\text{C}$  NMR (101 MHz,  $\text{CDCl}_3$ )  $\delta$  133.9, 133.8, 131.8, 128.5, 127.8, 127.4, 127.1, 127.0, 126.6, 125.7, 64.0 (d,  $J_{\text{C-P}} = 6.0$  Hz), 33.2 (d,  $J_{\text{C-P}} = 3.9$  Hz), 33.0, 29.5 (d,  $J_{\text{C-P}} = 5.3$  Hz), 28.0, 16.0 (d,  $J_{\text{C-P}} = 8.3$  Hz);  $^{31}\text{P}$  NMR (162 MHz,  $\text{CDCl}_3$ )  $\delta$  95.0. HRMS (ESI):  $m/z$   $[\text{M}+\text{H}]^+$  calcd for  $\text{C}_{18}\text{H}_{26}\text{O}_2\text{PS}_3$ : 401.0827; found: 401.0824.

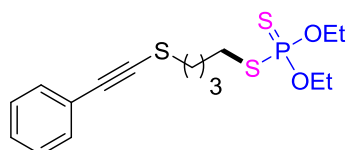

*O,O*-diethyl *S*-(4-((phenylethynyl)thio)butyl) phosphorodithioate (**9o**): TLC (PE/EtOAc, 20:1),  $R_f = 0.65$ ; Colorless liquid (83.1 mg, 74%),  $^1\text{H}$  NMR (400 MHz,  $\text{CDCl}_3$ )  $\delta$  7.44 - 7.38 (m, 2H), 7.30 - 7.26 (m, 3H), 4.26 - 4.07 (m, 4H), 2.96 - 2.89 (m, 2H), 2.81 (t,  $J = 6.7$  Hz, 2H), 1.98 - 1.83 (m, 4H), 1.36 (t,  $J = 7.1$  Hz, 6H);  $^{13}\text{C}$  NMR (101 MHz,  $\text{CDCl}_3$ )  $\delta$  131.6, 128.4, 128.2, 123.4, 93.4, 79.0, 64.1 (d,  $J_{\text{C-P}} = 6.0$  Hz), 35.1, 33.2 (d,  $J_{\text{C-P}} = 3.9$  Hz), 29.0 (d,  $J_{\text{C-P}} = 5.2$  Hz), 28.2, 16.0 (d,  $J_{\text{C-P}} = 8.4$  Hz);  $^{31}\text{P}$  NMR (162 MHz,  $\text{CDCl}_3$ )  $\delta$  95.0. HRMS (ESI):  $m/z$   $[\text{M}+\text{H}]^+$  calcd for  $\text{C}_{16}\text{H}_{24}\text{O}_2\text{PS}_3$ : 375.0671; found: 375.0675.

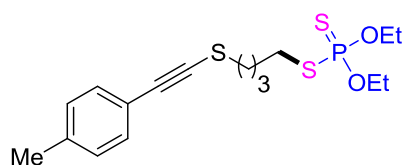



*O,O*-diethyl *S*-(4-((*p*-tolylethynyl)thio)butyl) phosphorodithioate (**9p**): TLC (PE/EtOAc, 20:1),  $R_f = 0.22$ ; Colorless liquid (66.4 mg, 57%),  $^1\text{H}$  NMR (400 MHz,  $\text{CDCl}_3$ )  $\delta$  7.32 - 7.27(m, 2H), 7.11 - 7.09 (m, 2H), 4.23 - 4.05 (m, 4H), 2.94 - 2.89 (m, 2H), 2.84 - 2.76 (m, 2H), 2.34 (s, 3H), 1.92 - 1.86 (m, 4H), 1.39 - 1.30 (m, 6H);  $^{13}\text{C}$  NMR (101 MHz,  $\text{CDCl}_3$ )  $\delta$  138.5, 131.6, 129.2, 120.4, 93.5, 78.0, 64.1 (d,  $J_{\text{C-P}} = 6.0$  Hz), 35.2, 33.2 (d,  $J_{\text{C-P}} = 3.9$  Hz), 29.0 (d,  $J_{\text{C-P}} = 5.2$  Hz), 28.2, 21.6, 16.0 (d,  $J_{\text{C-P}} = 8.3$  Hz);  $^{31}\text{P}$  NMR (162 MHz,  $\text{CDCl}_3$ )  $\delta$  95.0. HRMS (ESI):  $m/z$   $[\text{M}+\text{H}]^+$  calcd for  $\text{C}_{17}\text{H}_{26}\text{O}_2\text{PS}_3$ : 389.0827; found: 389.0829.

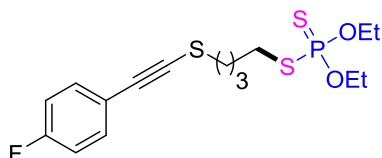

*O,O*-diethyl *S*-(4-(((4-fluorophenyl)ethynyl)thio)butyl) phosphorodithioate (**9q**): TLC (PE/EtOAc, 20:1),  $R_f = 0.52$ ; Colorless liquid (71.8 mg, 61%),  $^1\text{H}$  NMR (400 MHz,  $\text{CDCl}_3$ )  $\delta$  7.39 (d,  $J = 3.6$  Hz, 2H), 7.02 - 6.99 (m, 2H), 4.25 - 4.08 (m, 4H), 2.97 - 2.86 (m, 2H), 2.81 - 2.78 (m, 2H), 1.90 - 1.86 (m, 4H), 1.39 - 1.31 (m, 6H);  $^{13}\text{C}$  NMR (101 MHz,  $\text{CDCl}_3$ )  $\delta$  162.4 (d,  $J_{\text{C-F}} = 250.5$  Hz), 133.6 (d,  $J_{\text{C-F}} = 8.4$  Hz), 119.5 (d,  $J_{\text{C-F}} = 3.5$  Hz), 115.6 (d,  $J_{\text{C-F}} = 22.2$  Hz), 92.2, 78.7, 64.0 (d,  $J_{\text{C-P}} = 6.1$  Hz), 35.0, 33.1 (d,  $J_{\text{C-P}} = 3.8$  Hz), 28.9 (d,  $J_{\text{C-P}} = 5.3$  Hz), 28.2, 15.9 (d,  $J_{\text{C-P}} = 8.4$  Hz);  $^{31}\text{P}$  NMR (162 MHz,  $\text{CDCl}_3$ )  $\delta$  95.0. HRMS (ESI):  $m/z$   $[\text{M}+\text{H}]^+$  calcd for  $\text{C}_{16}\text{H}_{23}\text{FO}_2\text{PS}_3$ : 393.0576; found: 393.0578.

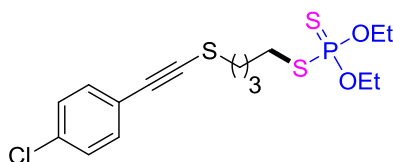

*S*-(4-(((4-chlorophenyl)ethynyl)thio)butyl) *O,O*-diethyl phosphorodithioate (**9r**): TLC (PE/EtOAc, 20:1),  $R_f = 0.63$ ; Colorless liquid (77.3 mg, 63%),  $^1\text{H}$  NMR (400 MHz,  $\text{CDCl}_3$ )  $\delta$  7.34 (d,  $J = 8.4$  Hz, 2H), 7.29 - 7.25 (m, 2H), 4.26 - 4.07 (m, 4H), 2.96 - 2.89 (m, 2H), 2.82 (t,  $J = 6.6$  Hz, 2H), 1.97 - 1.80 (m, 4H), 1.41 - 1.33 (m, 6H);  $^{13}\text{C}$  NMR (101 MHz,  $\text{CDCl}_3$ )  $\delta$  134.2, 132.8, 128.8, 122.0, 92.3, 80.4, 64.1 (d,  $J_{\text{C-P}} = 6.1$  Hz), 35.2, 35.2, 33.2 (d,  $J_{\text{C-P}} = 3.9$  Hz), 29.0 (d,  $J_{\text{C-P}} = 5.2$  Hz), 28.2, 16.0 (d,  $J_{\text{C-P}} = 8.3$  Hz);  $^{31}\text{P}$  NMR (162 MHz,  $\text{CDCl}_3$ )  $\delta$  95.1. HRMS (ESI):  $m/z$   $[\text{M}+\text{H}]^+$  calcd for  $\text{C}_{16}\text{H}_{23}\text{ClO}_2\text{PS}_3$ : 409.0281; found: 409.0278.

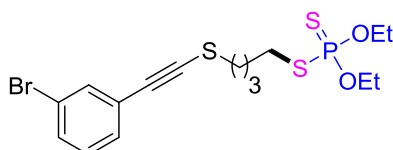

*S*-(4-(((3-bromophenyl)ethynyl)thio)butyl) *O,O*-diethyl phosphorodithioate (**9s**): TLC (PE/EtOAc, 20:1),  $R_f = 0.47$ ; Colorless liquid (74.8 mg, 55%),  $^1\text{H}$  NMR (400 MHz,  $\text{CDCl}_3$ )  $\delta$  7.55 (s, 1H), 7.42 (d,  $J = 7.4$  Hz, 1H), 7.33 (d,  $J = 7.5$  Hz, 1H), 7.17 (t,  $J = 7.8$  Hz, 1H), 4.23 - 4.10 (m, 4H), 2.97 - 2.89 (m, 2H), 2.82 - 2.80 (d,  $J = 6.6$  Hz, 2H), 1.92 - 1.87 (m, 4H), 1.36 (t,  $J = 6.8$  Hz, 6H);  $^{13}\text{C}$  NMR (101 MHz,  $\text{CDCl}_3$ )  $\delta$  134.1, 131.3, 130.0, 129.9, 125.5, 122.2, 92.0, 81.1, 64.1 (d,  $J_{\text{C-P}} = 6.2$  Hz), 35.2, 33.2 (d,  $J_{\text{C-P}} = 5.3$  Hz), 29.0 (d,  $J_{\text{C-P}} = 5.3$  Hz), 28.3, 16.00 (d,  $J_{\text{C-P}} = 8.3$  Hz);  $^{31}\text{P}$  NMR (162 MHz,  $\text{CDCl}_3$ )  $\delta$  95.1. HRMS (ESI):  $m/z$   $[\text{M}+\text{H}]^+$  calcd for  $\text{C}_{16}\text{H}_{23}\text{BrO}_2\text{PS}_3$ : 452.9776; found: 452.9778.

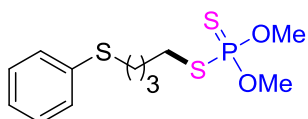

*O,O*-dimethyl *S*-(4-(phenylthio)butyl) phosphorodithioate (**9t**): TLC (PE/EtOAc, 20:1),  $R_f = 0.39$ ; Colorless liquid (75.5 mg, 78%);  $^1\text{H}$  NMR (400 MHz,  $\text{CDCl}_3$ )  $\delta$  7.37 - 7.27 (m, 4H), 7.20 - 7.14 (m, 1H), 3.76 (dd,  $J = 15.0, 2.1$  Hz, 6H), 2.97 - 2.80 (m, 4H), 1.87 - 1.68 (m, 4H);  $^{13}\text{C}$  NMR (101 MHz,  $\text{CDCl}_3$ )  $\delta$  136.3, 129.4, 128.9, 126.1, 54.0 (d,  $J_{\text{C-P}} = 5.7$  Hz), 33.2 (d,  $J_{\text{C-P}} = 3.9$  Hz), 33.1, 29.4 (d,  $J_{\text{C-P}} = 5.1$  Hz), 28.0;  $^{31}\text{P}$  NMR (162 MHz,  $\text{CDCl}_3$ )  $\delta$  100.17; HRMS (ESI):  $m/z$   $[\text{M}+\text{H}]^+$  calcd for  $\text{C}_{12}\text{H}_{20}\text{O}_2\text{PS}_3$ : 323.0358; found: 323.0361.

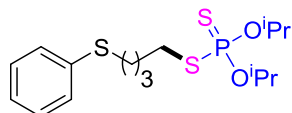

*O,O*-diisopropyl *S*-(4-(phenylthio)butyl) phosphorodithioate (**9u**): TLC (PE/EtOAc, 20:1),  $R_f = 0.74$ ; Colorless liquid (82.9 mg, 73%),  $^1\text{H}$  NMR (400 MHz,  $\text{CDCl}_3$ )  $\delta$  7.34 - 7.26 (m, 4H), 7.19 - 7.16 (m, 1H), 4.87 - 4.75 (m, 2H), 2.95 - 2.85 (m, 4H), 1.87 - 1.71 (m, 4H), 1.34 (t,  $J = 5.5$  Hz, 12H);  $^{13}\text{C}$  NMR (101 MHz,  $\text{CDCl}_3$ )  $\delta$  136.4, 129.4, 129.0, 126.1, 73.5 (d,  $J_{\text{C-P}} = 6.9$  Hz), 33.3 (d,  $J_{\text{C-P}} = 3.8$  Hz), 33.3, 29.3 (d,  $J_{\text{C-P}} = 6.0$  Hz), 28.1, 23.9 (d,  $J_{\text{C-P}} = 4.6$  Hz), 23.6 (d,  $J_{\text{C-P}} = 5.2$  Hz);  $^{31}\text{P}$  NMR (162 MHz,  $\text{CDCl}_3$ )  $\delta$  92.1. HRMS (ESI):  $m/z$   $[\text{M}+\text{H}]^+$  calcd for  $\text{C}_{16}\text{H}_{28}\text{O}_2\text{PS}_3$ : 379.0984; found: 379.0981.

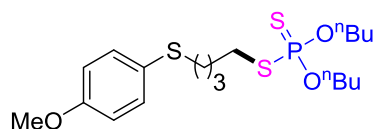

*O,O*-dibutyl *S*-(4-(4-methoxyphenyl)thio)butyl phosphorodithioate (**9v**): TLC (PE/EtOAc, 20:1),  $R_f = 0.48$ ; Colorless liquid (100.9 mg, 77%),  $^1\text{H}$  NMR (400 MHz,  $\text{CDCl}_3$ )  $\delta$  7.34 (d,  $J = 7.0$  Hz, 2H), 6.85 (d,  $J = 7.2$  Hz, 2H), 4.23 - 3.96 (m, 4H), 2.94 - 2.73 (m, 4H), 1.81 - 1.78 (m, 2H), 1.75 - 1.61 (m, 6H), 1.58 (s, 2H), 1.46 - 1.39 (m, 4H), 1.30 - 1.22 (m, 1H), 0.96 - 0.92 (m, 6H);  $^{13}\text{C}$  NMR (101 MHz,  $\text{CDCl}_3$ )  $\delta$  159.1, 133.5, 126.3, 114.7, 67.8 (d,  $J_{\text{C-P}} = 6.7$  Hz), 55.5, 35.5 (d,  $J_{\text{C-P}} = 6.5$  Hz), 33.2 (d,  $J_{\text{C-P}} = 3.8$  Hz), 32.1, 29.4 (d,  $J_{\text{C-P}} = 5.5$  Hz), 28.3, 19.0, 13.8;  $^{31}\text{P}$  NMR (162 MHz,  $\text{CDCl}_3$ )  $\delta$  95.4. HRMS (ESI):  $m/z$   $[\text{M}+\text{H}]^+$  calcd for  $\text{C}_{19}\text{H}_{34}\text{O}_3\text{PS}_3$ : 437.1402; found: 437.1408.

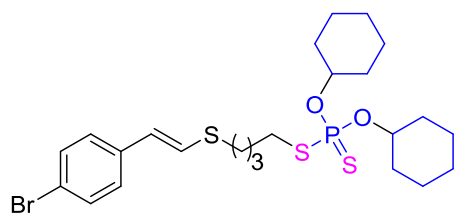

*S*-(4-(4-bromophenyl)thio)butyl *O,O*-dicyclohexyl phosphorodithioate (**9w**): TLC (PE/EtOAc, 20:1),  $R_f = 0.53$ ; Colorless liquid (94.4 mg, 56%).  $^1\text{H}$  NMR (400 MHz,  $\text{CDCl}_3$ )  $\delta$  7.40 (d,  $J = 8.3$  Hz, 2H), 7.15 (d,  $J = 8.3$  Hz, 2H), 6.71 (d,  $J = 15.6$  Hz, 1H), 6.39 (d,  $J = 15.6$  Hz, 1H), 4.64 - 4.51 (m, 2H), 2.93 (dt,  $J = 15.2, 6.6$  Hz, 2H), 2.81 (t,  $J = 6.6$  Hz, 2H), 2.05 - 1.68 (m, 14H), 1.55 - 1.47 (m, 3H), 1.41 - 1.20 (m, 7H);  $^{13}\text{C}$  NMR (101 MHz,  $\text{CDCl}_3$ )  $\delta$  136.1, 131.8, 127.1, 126.1, 125.80 (s), 120.6, 78.3 (d,  $J_{\text{C-P}} = 7.6$  Hz), 33.6 (d,  $J_{\text{C-P}} = 6.5$  Hz), 33.3 (d,  $J_{\text{C-P}} = 6.5$  Hz), 33.3, 32.1, 29.3 (d,  $J_{\text{C-P}} = 5.9$  Hz), 28.4, 25.3, 23.8 (d,  $J_{\text{C-P}} = 4.8$  Hz);  $^{31}\text{P}$  NMR (162 MHz,  $\text{CDCl}_3$ )  $\delta$  91.91. HRMS (ESI):  $m/z$   $[\text{M}+\text{H}]^+$  calcd for  $\text{C}_{24}\text{H}_{37}\text{BrO}_2\text{PS}_3$ : 563.0871; found: 563.0875.

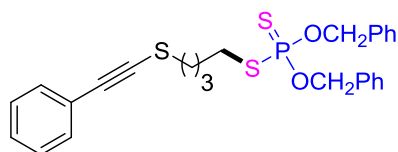

*O,O*-dibenzyl *S*-(4-((phenylethynyl)thio)butyl) phosphorodithioate (**9x**): TLC (PE/EtOAc, 3:1),  $R_f = 0.38$ ; Colorless liquid (95.7 mg, 64%),  $^1\text{H NMR}$  (400 MHz,  $\text{CDCl}_3$ )  $\delta$  7.43 - 7.23 (m, 15H), 5.17 - 5.07 (m, 4H), 2.90 - 2.77 (m, 2H), 2.68 (t,  $J = 6.8$  Hz, 2H), 1.87 - 1.69 (m, 4H);  $^{13}\text{C NMR}$  (101 MHz,  $\text{CDCl}_3$ )  $\delta$  135.7 (d,  $J_{\text{C-P}} = 8.7$  Hz), 131.6, 128.7, 128.7, 128.4, 128.4, 128.2, 123.5, 93.4, 79.1, 69.4 (d,  $J_{\text{C-P}} = 5.9$  Hz), 35.0, 33.2 (d,  $J_{\text{C-P}} = 4.0$  Hz), 28.8 (d,  $J_{\text{C-P}} = 5.6$  Hz), 28.2;  $^{31}\text{P NMR}$  (162 MHz,  $\text{CDCl}_3$ )  $\delta$  96.4. HRMS (ESI):  $m/z$   $[\text{M}+\text{H}]^+$  calcd for  $\text{C}_{26}\text{H}_{28}\text{O}_2\text{PS}_3$ : 499.0984; found: 499.0992.

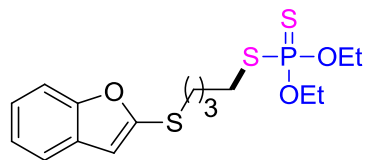

*S*-(4-(benzofuran-2-ylthio)butyl) *O,O*-diethyl phosphorodithioate (**9y**): TLC (PE/EtOAc, 10:1),  $R_f = 0.41$ ; Colorless liquid (83.1 mg, 71%);  $^1\text{H NMR}$  (400 MHz,  $\text{CDCl}_3$ )  $\delta$  7.57 (d,  $J = 7.6$  Hz, 1H), 7.51 (d,  $J = 8.1$  Hz, 1H), 7.34 (d,  $J = 7.7$  Hz, 1H), 7.28 (d,  $J = 7.4$  Hz, 1H), 6.87 (s, 1H), 4.32 - 4.15 (m, 4H), 3.05 - 2.89 (m, 4H), 1.96 - 1.81 (m, 4H), 1.41 (t,  $J = 7.1$  Hz, 6H);  $^{13}\text{C NMR}$  (101 MHz,  $\text{CDCl}_3$ )  $\delta$  156.2, 150.0, 128.5, 124.4, 122.8, 120.3, 111.2, 110.8, 63.8 (d,  $J = 6.1$  Hz), 33.9, 32.9 (d,  $J = 3.8$  Hz), 29.0 (d,  $J = 5.2$  Hz), 28.5, 15.8 (d,  $J = 8.3$  Hz);  $^{31}\text{P NMR}$  (162 MHz,  $\text{CDCl}_3$ )  $\delta$  95.01. HRMS (ESI):  $m/z$   $[\text{M}+\text{H}]^+$  calcd for  $\text{C}_{16}\text{H}_{24}\text{O}_3\text{PS}_3$ : 391.0620; found: 391.0625.

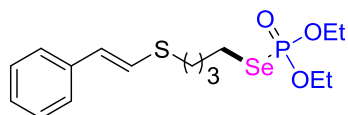

(*E*)-*O,O*-diethyl *Se*-(4-(styrylthio)butyl) phosphoroselenoate (**10a**): TLC (PE/EtOAc, 3:1),  $R_f = 0.37$ ; Colorless liquid (105.1 mg, 86%),  $^1\text{H NMR}$  (400 MHz,  $\text{CDCl}_3$ )  $\delta$  7.43 - 7.15 (m, 5H), 6.69 (d,  $J = 15.6$  Hz, 1H), 6.48 (d,  $J = 15.6$  Hz, 1H), 4.31 - 4.05 (m, 4H), 2.94 - 2.80 (m, 4H), 1.95 - 1.84 (m, 4H), 1.36 (t,  $J = 7.0$  Hz, 6H);  $^{13}\text{C NMR}$  (101 MHz,  $\text{CDCl}_3$ )  $\delta$  137.0, 128.7, 127.4, 127.0, 125.6, 124.8, 63.5 (d,  $J_{\text{C-P}} = 5.8$  Hz), 32.0, 30.3 (d,  $J_{\text{C-P}} = 5.0$  Hz), 29.3, 25.8 (d,  $J_{\text{C-P}} = 4.5$  Hz), 16.1 (d,  $J_{\text{C-P}} = 7.4$  Hz);  $^{31}\text{P NMR}$  (162 MHz,  $\text{CDCl}_3$ )  $\delta$  20.6. HRMS (ESI):  $m/z$   $[\text{M}+\text{H}]^+$  calcd for  $\text{C}_{16}\text{H}_{26}\text{O}_3\text{PSSe}$ : 409.0500; found: 409.0493.

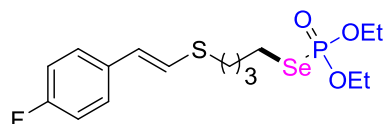

(*E*)-*O,O*-diethyl *Se*-(4-((4-fluorostyryl)thio)butyl) phosphoroselenoate (**10b**): TLC (PE/EtOAc, 3:1),  $R_f = 0.44$ ; Colorless liquid (104.6 mg, 82%).  $^1\text{H NMR}$  (400 MHz,  $\text{CDCl}_3$ )  $\delta$  7.27 - 7.23 (m, 2H), 7.00 - 6.96 (m, 2H), 6.61 (d,  $J = 15.6$  Hz, 1H), 6.44 (d,  $J = 15.6$  Hz, 1H), 4.25 - 4.06 (m, 4H), 2.94 - 2.87 (m, 2H), 2.81 (t,  $J = 7.1$  Hz, 2H), 1.97 - 1.90 (m, 2H), 1.87 - 1.79 (m, 2H), 1.35 (t,  $J = 7.0$  Hz, 6H);  $^{13}\text{C NMR}$  (101 MHz,  $\text{CDCl}_3$ )  $\delta$  162.0 (d,  $J_{\text{C-F}} = 247.3$  Hz), 133.3 (d,  $J_{\text{C-F}} = 3.4$  Hz), 127.0 (d,  $J_{\text{C-F}} = 7.9$  Hz), 126.4, 124.5 (d,  $J_{\text{C-F}} = 2.2$  Hz), 115.6 (d,  $J_{\text{C-F}} = 21.8$  Hz), 63.5 (d,  $J_{\text{C-P}} = 5.9$  Hz), 32.1, 30.3 (d,  $J_{\text{C-P}} = 4.2$  Hz), 29.4, 25.8 (d,  $J_{\text{C-P}} = 4.7$  Hz), 16.1 (d,  $J_{\text{C-P}} = 7.5$  Hz);  $^{19}\text{F NMR}$  (376 MHz,  $\text{CDCl}_3$ )  $\delta$  -115.24;  $^{31}\text{P NMR}$  (162 MHz,  $\text{CDCl}_3$ )  $\delta$  20.5. HRMS (ESI):  $m/z$   $[\text{M}+\text{H}]^+$  calcd for  $\text{C}_{16}\text{H}_{25}\text{FO}_3\text{PSSe}$ : 427.0406; found: 427.0403.

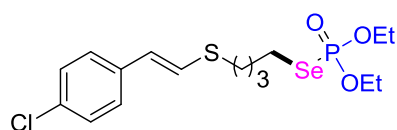

(*E*)-*Se*-(4-((4-chlorostyryl)thio)butyl) *O,O*-diethyl phosphoroselenoate (**10c**): TLC (PE/EtOAc, 3:1),  $R_f = 0.57$ ; Colorless liquid (110.0 mg, 83%),  $^1\text{H NMR}$  (400 MHz,  $\text{CDCl}_3$ )  $\delta$  7.25 (d,  $J = 8.4$  Hz, 2H), 7.20 (d,  $J = 8.4$  Hz, 2H), 6.69 (d,  $J = 15.6$  Hz, 1H), 6.41 (d,  $J = 15.6$  Hz, 1H), 4.23 - 4.10 (m, 4H), 2.91 - 2.87 (m, 2H), 2.82 (t,  $J = 7.1$  Hz, 2H), 1.98 - 1.89 (m, 2H), 1.86 - 1.79 (m, 2H), 1.36 (t,  $J = 7.1$  Hz, 6H);  $^{13}\text{C NMR}$  (101 MHz,  $\text{CDCl}_3$ )  $\delta$  135.6, 132.5, 128.9, 126.7, 125.9, 125.8, 63.5 (d,  $J_{\text{C-P}} = 5.9$  Hz), 32.0, 30.3 (d,  $J_{\text{C-P}} = 4.2$  Hz), 29.3, 25.8 (d,  $J_{\text{C-P}} = 4.6$  Hz), 16.1 (d,  $J_{\text{C-P}} = 7.4$  Hz);  $^{31}\text{P NMR}$  (162 MHz,  $\text{CDCl}_3$ )  $\delta$  20.5. HRMS (ESI):  $m/z$   $[\text{M}+\text{H}]^+$  calcd for  $\text{C}_{16}\text{H}_{25}\text{ClO}_3\text{PSSe}$ : 443.0110; found: 443.0111.

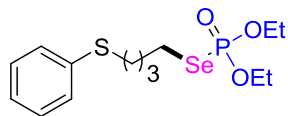

*O,O*-diethyl *Se*-(4-(phenylthio)butyl) phosphoroselenoate (**10d**): TLC (PE/EtOAc, 3:1),  $R_f = 0.36$ ; Colorless liquid (96.1 mg, 84%),  $^1\text{H NMR}$  (400 MHz,  $\text{CDCl}_3$ )  $\delta$  7.34 - 7.27 (m, 4H), 7.20 - 7.15 (m, 1H), 4.24 - 4.06 (m, 4H), 2.96 - 2.81 (m, 4H), 1.92 - 1.91 (m, 2H), 1.75 - 1.72 (m, 2H), 1.39 - 1.35 (m, 6H);  $^{13}\text{C NMR}$  (101 MHz,  $\text{CDCl}_3$ )  $\delta$  136.4, 129.4, 129.0, 126.1, 63.5 (d,  $J_{\text{C-P}} = 5.8$  Hz), 33.2, 30.4 (d,  $J_{\text{C-P}} = 4.3$  Hz), 29.11, 25.9 (d,  $J_{\text{C-P}} = 4.7$  Hz), 16.1 (d,  $J_{\text{C-P}} = 7.5$  Hz);  $^{31}\text{P NMR}$  (162 MHz,  $\text{CDCl}_3$ )  $\delta$  20.6. HRMS (ESI):  $m/z$   $[\text{M}+\text{H}]^+$  calcd for  $\text{C}_{14}\text{H}_{24}\text{O}_3\text{PSSe}$ : 383.0344; found: 383.0347.

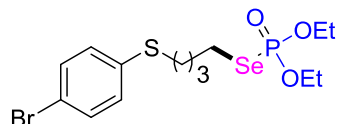

*Se*-(4-((4-bromophenyl)thio)butyl) *O,O*-diethyl phosphoroselenoate (**10e**): TLC (PE/EtOAc, 3:1),  $R_f = 0.50$ ; Colorless liquid (107.7 mg, 78%).  $^1\text{H NMR}$  (400 MHz,  $\text{CDCl}_3$ )  $\delta$  7.39 (d,  $J = 8.1$  Hz, 2H), 7.18 (d,  $J = 8.1$  Hz, 2H), 4.23 - 4.09 (m, 4H), 2.97 - 2.82 (m, 4H), 1.93 (d,  $J = 7.3$  Hz, 2H), 1.83 - 1.73 (m, 2H), 1.41 - 1.31 (m, 6H);  $^{13}\text{C NMR}$  (101 MHz,  $\text{CDCl}_3$ )  $\delta$  135.7, 132.1, 130.9, 119.9, 63.5 (d,  $J_{\text{C-P}} = 5.8$  Hz), 33.3 (d,  $J_{\text{C-P}} = 4.2$  Hz), 28.9, 25.8 (d,  $J_{\text{C-P}} = 4.4$  Hz), 16.1 (d,  $J_{\text{C-P}} = 7.4$  Hz);  $^{31}\text{P NMR}$  (162 MHz,  $\text{CDCl}_3$ )  $\delta$  20.5. HRMS (ESI):  $m/z$   $[\text{M}+\text{H}]^+$  calcd for  $\text{C}_{14}\text{H}_{23}\text{BrO}_3\text{PSSe}$ : 460.9449; found: 460.9447.

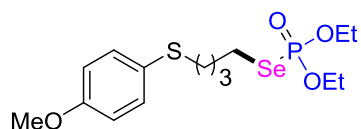

*O,O*-diethyl *Se*-(4-((4-methoxyphenyl)thio)butyl) phosphoroselenoate (**10f**): TLC (PE/EtOAc, 3:1),  $R_f = 0.57$ ; Colorless liquid (90.1 mg, 73%),  $^1\text{H NMR}$  (400 MHz,  $\text{CDCl}_3$ )  $\delta$  7.38 - 7.31 (m, 2H), 6.89 - 6.80 (m, 2H), 4.22 - 4.08 (m, 4H), 3.80 (d,  $J = 2.3$  Hz, 3H), 2.90 - 2.79 (m, 4H), 1.93 - 1.85 (m, 2H), 1.70 - 1.66 (m, 2H), 1.39 - 1.35 (m, 6H);  $^{13}\text{C NMR}$  (101 MHz,  $\text{CDCl}_3$ )  $\delta$  159.1, 133.5, 126.4, 114.7, 63.5 (d,  $J_{\text{C-P}} = 5.8$  Hz), 55.5, 35.4, 30.2 (d,  $J_{\text{C-P}} = 4.3$  Hz), 29.3, 25.9 (d,  $J_{\text{C-P}} = 4.6$  Hz), 16.1 (d,  $J_{\text{C-P}} = 7.5$  Hz);  $^{31}\text{P NMR}$  (162 MHz,  $\text{CDCl}_3$ )  $\delta$  20.7. HRMS (ESI):  $m/z$   $[\text{M}+\text{H}]^+$  calcd for  $\text{C}_{15}\text{H}_{26}\text{O}_4\text{PSSe}$ : 413.0449; found: 413.0454.

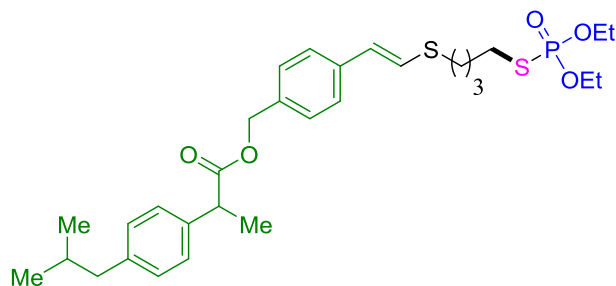

(*E*)-4-(2-((4-((diethoxyphosphoryl)thio)butyl)thio)vinyl)benzyl 2-(4-isobutylphenyl)propanoate (**3ra**): TLC (PE/EtOAc, 3:1),  $R_f = 0.68$ ; Colorless liquid (116.3 mg, 67%),  $^1\text{H NMR}$  (400 MHz,  $\text{CDCl}_3$ )  $\delta$  7.24 - 7.14 (m, 6H), 7.09 (d,  $J = 6.4$  Hz, 2H), 6.69 (d,  $J = 15.5$  Hz, 1H), 6.44 (d,  $J = 15.6$  Hz, 1H), 5.12 - 5.00 (m, 2H), 4.23 - 4.09 (m, 4H), 3.74 - 3.73 (m, 1H), 2.92 - 2.79 (m, 4H), 2.45 (d,  $J = 6.4$  Hz, 2H), 1.83 (s, 4H), 1.50 (d,  $J = 6.8$  Hz, 4H), 1.35 (d,  $J = 6.0$  Hz, 6H), 0.92 - 0.88 (m, 6H);  $^{13}\text{C NMR}$  (101 MHz,  $\text{CDCl}_3$ )  $\delta$  174.7, 140.7, 137.7, 136.9, 134.7, 129.4, 128.4, 127.3, 126.8, 125.6, 125.3, 66.2, 63.7 (d,  $J_{\text{C-P}} = 6.1$  Hz), 45.2, 45.1, 32.1, 30.5 (d,  $J_{\text{C-P}} = 3.9$  Hz), 30.3, 29.9 (d,  $J_{\text{C-P}} = 5.4$  Hz), 28.3, 22.5, 18.5, 16.2 (d,  $J_{\text{C-P}} = 7.2$  Hz);  $^{31}\text{P NMR}$  (162 MHz,  $\text{CDCl}_3$ )  $\delta$  28.0. HRMS (ESI):  $m/z$   $[\text{M}+\text{H}]^+$  calcd for  $\text{C}_{30}\text{H}_{44}\text{O}_5\text{PS}_2$ : 579.2362; found: 579.2368.

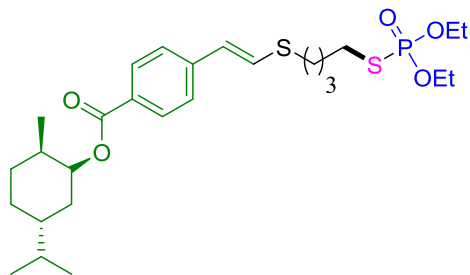

(*1S,2R,5R*)-5-isopropyl-2-methylcyclohexyl-4-((*E*)-2-((4-((diethoxyphosphoryl)thio)butyl)thio)vinyl)benzoate (**3sa**): TLC (PE/EtOAc, 3:1),  $R_f = 0.44$ ; Colorless liquid (117.2 mg, 72%).  $^1\text{H NMR}$  (400 MHz,  $\text{CDCl}_3$ )  $\delta$  7.96 (d,  $J = 8.2$  Hz, 2H), 7.33 (d,  $J = 8.2$  Hz, 2H), 6.87 (d,  $J = 15.6$  Hz, 1H), 6.46 (d,  $J = 15.6$  Hz, 1H), 4.95 - 4.88 (m, 1H), 4.27 - 4.04 (m, 4H), 2.95 - 2.80 (m, 4H), 2.12 (d,  $J = 12.1$  Hz, 1H), 1.98 - 1.90 (m, 1H), 1.91 - 1.79 (m, 5H), 1.73 (d,  $J = 11.5$  Hz, 2H), 1.55 (t,  $J = 11.3$  Hz, 2H), 1.36 (t,  $J = 7.1$  Hz, 6H), 1.16 - 1.07 (m, 2H), 0.94 - 0.90 (m, 6H), 0.79 (d,  $J = 6.9$  Hz, 3H);  $^{13}\text{C NMR}$  (101 MHz,  $\text{CDCl}_3$ )  $\delta$  166.0, 141.2, 130.1, 128.9, 128.3, 125.6, 125.2, 74.8, 63.7 (d,  $J_{\text{C-P}} = 6.1$  Hz), 47.4, 41.1, 34.4, 31.9, 31.5, 30.4 (d,  $J_{\text{C-P}} = 4.0$  Hz), 29.9 (d,  $J_{\text{C-P}} = 5.4$  Hz), 28.2, 26.6, 23.8, 22.2, 20.9, 16.7, 16.2 (d,  $J_{\text{C-P}} = 7.2$  Hz);  $^{31}\text{P NMR}$  (162 MHz,  $\text{CDCl}_3$ )  $\delta$  27.8. HRMS (ESI):  $m/z$   $[\text{M}+\text{H}]^+$  calcd for  $\text{C}_{27}\text{H}_{44}\text{O}_5\text{PS}_2$ : 543.2362; found: 543.2365.

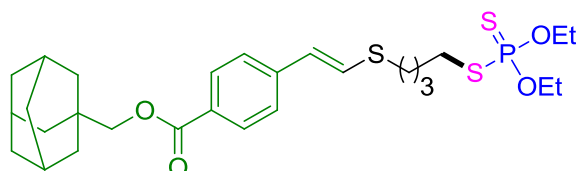

(*E*)-adamantan-1-ylmethyl 4-(2-((4-((diethoxyphosphoryl)thio)butyl)thio)vinyl)benzoate (**9ab**): TLC (PE/EtOAc, 10:1),  $R_f = 0.31$ ; Colorless liquid (109.1 mg, 64%),  $^1\text{H NMR}$  (400 MHz,  $\text{CDCl}_3$ )  $\delta$  7.97 (d,  $J = 8.1$  Hz, 2H), 7.34 (d,  $J = 8.1$  Hz, 2H), 6.88 (d,  $J = 15.6$  Hz, 1H), 6.46 (d,  $J = 15.6$  Hz, 1H), 4.27 - 4.04 (m, 4H), 3.91 (s, 2H), 2.96 - 2.85 (m, 4H), 2.02 (s, 3H), 1.87 - 1.80 (m, 4H), 1.76 (d,  $J = 12.2$  Hz, 3H), 1.69 (d,  $J = 12.8$  Hz, 3H), 1.64 (s, 5H), 1.36 (t,  $J = 7.1$  Hz, 6H);  $^{13}\text{C NMR}$  (101 MHz,  $\text{CDCl}_3$ )  $\delta$  166.5, 141.3, 130.1, 128.6, 128.4, 125.5, 125.2, 74.4, 64.1 (d,  $J = 6.1$  Hz), 39.5, 37.1, 33.6, 33.2 (d,  $J = 3.9$  Hz), 31.9, 29.4 (d,  $J = 5.2$  Hz), 28.2, 28.1, 16.0 (d,  $J = 8.3$  Hz).  $^{31}\text{P NMR}$  (162 MHz,  $\text{CDCl}_3$ )  $\delta$  95.1. HRMS (ESI):  $m/z$   $[\text{M}+\text{H}]^+$  calcd for  $\text{C}_{28}\text{H}_{42}\text{O}_4\text{PS}_3$ : 569.1977; found: 569.1984.

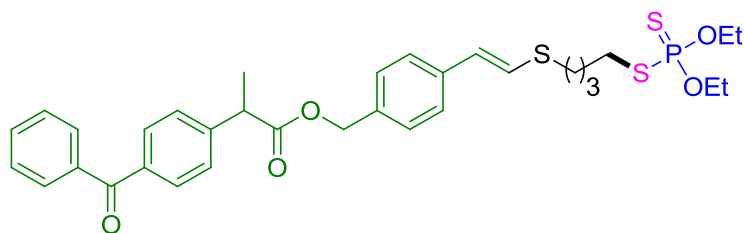

(*E*)-4-(2-((4-((diethoxyphosphorothioyl)thio)butyl)thio)vinyl)benzyl 2-(4-benzoylphenyl)propanoate (**9ac**): (PE/EtOAc, 4:1),  $R_f = 0.52$ ; Colorless liquid (123.4 mg, 64%);  $^1\text{H NMR}$  (400 MHz,  $\text{CDCl}_3$ )  $\delta$  7.80 - 7.72 (m, 3H), 7.67 (d,  $J = 7.6$  Hz, 1H), 7.58 (t,  $J = 7.3$  Hz, 1H), 7.53 (d,  $J = 7.6$  Hz, 1H), 7.49 - 7.39 (m, 3H), 7.22 (d,  $J = 8.0$  Hz, 2H), 7.17 (d,  $J = 7.9$  Hz, 2H), 6.69 (d,  $J = 15.6$  Hz, 1H), 6.43 (d,  $J = 15.6$  Hz, 1H), 5.12 - 5.01 (m, 2H), 4.25 - 4.06 (m, 4H), 3.84 (q,  $J = 7.1$  Hz, 1H), 2.99 - 2.85 (m, 2H), 2.81 (t,  $J = 6.3$  Hz, 2H), 1.81 (s, 4H), 1.54 (d,  $J = 7.1$  Hz, 3H), 1.35 (t,  $J = 7.0$  Hz, 6H);  $^{13}\text{C NMR}$  (101 MHz,  $\text{CDCl}_3$ )  $\delta$  196.5, 173.8, 140.7, 137.9, 137.5, 137.0, 134.3, 132.6, 131.6, 130.1, 129.3, 129.0, 128.6, 128.5, 128.4, 126.6, 125.6, 125.5, 66.4, 64.0 (d,  $J = 6.1$  Hz), 45.4, 33.1 (d,  $J = 3.9$  Hz), 32.0, 29.4 (d,  $J = 5.2$  Hz), 28.3, 18.4, 15.6 (d,  $J = 8.3$  Hz). HRMS (ESI):  $m/z$   $[\text{M}+\text{H}]^+$  calcd for  $\text{C}_{33}\text{H}_{40}\text{O}_5\text{PS}_3$ : 643.1770; found: 643.1174.

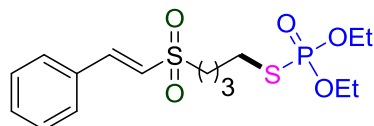

(*E*)-*O,O*-diethyl *S*-(4-(styrylsulfonyl)butyl) phosphorothioate (**11a**): TLC (PE/EtOAc, 1:3),  $R_f = 0.66$ ; Colorless liquid (178.4 mg, 91%),  $^1\text{H NMR}$  (400 MHz,  $\text{CDCl}_3$ )  $\delta$  7.54 (d,  $J = 15.5$  Hz, 1H), 7.47 - 7.45 (d,  $J = 6.9$  Hz, 2H), 7.38 - 7.37 (m, 3H), 6.76 (d,  $J = 15.5$  Hz, 1H), 4.23 - 3.94 (m, 4H), 3.03 (t,  $J = 7.1$  Hz, 2H), 2.86 - 2.69 (m, 2H), 1.94 - 1.77 (m, 4H), 1.28 (t,  $J = 7.0$  Hz, 6H);  $^{13}\text{C NMR}$  (101 MHz,  $\text{CDCl}_3$ )  $\delta$  145.3, 132.2, 131.6, 129.3, 128.8, 124.6, 63.9 (d,  $J_{\text{C-P}} = 6.1$  Hz), 54.5, 30.2 (d,  $J_{\text{C-P}} = 3.8$  Hz), 29.7 (d,  $J_{\text{C-P}} = 4.9$  Hz), 21.6, 16.2 (d,  $J_{\text{C-P}} = 7.2$  Hz);  $^{31}\text{P NMR}$  (162 MHz,  $\text{CDCl}_3$ )  $\delta$  27.42. HRMS (ESI):  $m/z$   $[\text{M}+\text{H}]^+$  calcd for  $\text{C}_{16}\text{H}_{26}\text{O}_5\text{PS}_2$ : 393.0954; found: 393.0958.

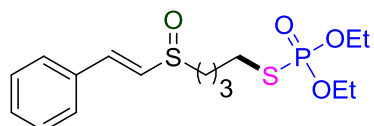

(*E*)-*O,O*-diethyl *S*-(4-(styrylsulfinyl)butyl) phosphorothioate (**11b**): TLC (PE/EtOAc, 1:3), Colorless liquid (137.3 mg, 73%),  $R_f = 0.32$ ;  $^1\text{H NMR}$  (400 MHz,  $\text{CDCl}_3$ )  $\delta$  7.41 (d,  $J = 6.8$  Hz, 2H), 7.34 - 7.30 (m, 3H), 7.18 (d,  $J = 16.9$  Hz, 1H), 6.76 (d,  $J = 15.5$  Hz, 1H), 4.15 - 4.00 (m, 4H), 2.85 - 2.69 (m, 4H), 1.94 - 1.78 (m, 4H), 1.31 - 1.26 (m, 6H);  $^{13}\text{C NMR}$  (101 MHz,  $\text{CDCl}_3$ )  $\delta$  137.3, 133.9, 130.1, 129.9, 129.1, 127.8, 63.8 (d,  $J_{\text{C-P}} = 6.1$  Hz), 53.2, 30.3 (d,  $J_{\text{C-P}} = 4.0$  Hz), 30.1 (d,  $J_{\text{C-P}} = 5.1$  Hz), 29.8, 21.1, 16.2 (d,  $J_{\text{C-P}} = 7.2$  Hz);  $^{31}\text{P NMR}$  (162 MHz,  $\text{CDCl}_3$ )  $\delta$  27.6. HRMS (ESI):  $m/z$   $[\text{M}+\text{H}]^+$  calcd for  $\text{C}_{16}\text{H}_{26}\text{O}_4\text{PS}_2$ : 377.1005; found: 377.1008.

#### 4. References

- [1] Wang, C.; Liu, B.; Shao, Z.; Zhou, J.; Shao, A.; Zou, L.-H.; Wen, J., Synthesis of 1,2-Diamines from Vinyl Sulfonium Salts and Arylamines. *Org. Lett.* **2022**, *24*, 6455-6459.
- [2] Srogl, J.; Allred, G. D.; Liebeskind, L. S., Sulfonium Salts. Participants par Excellence in Metal-Catalyzed Carbon-Carbon Bond-Forming Reactions. *J. Am. Chem. Soc.* **1997**, *119*,

12376-12377.

- [3] Aukland, M. H.; Talbot, F. J. T.; Fernández-Salas, J. A.; Ball, M.; Pulis, A. P.; Procter, D. J., An Interrupted Pummerer/Nickel-Catalysed Cross-Coupling Sequence. *Angew. Chem. Int. Ed.* **2018**, *57*, 9785-9789.
- [4] Sarkar, S.; Kalek, M., Metal-Free S-Arylation of Phosphorothioate Diesters and Related Compounds with Diaryliodonium Salts. *Org. Lett.* **2023**, *25*, 671-675.

## 5. NMR spectra of products

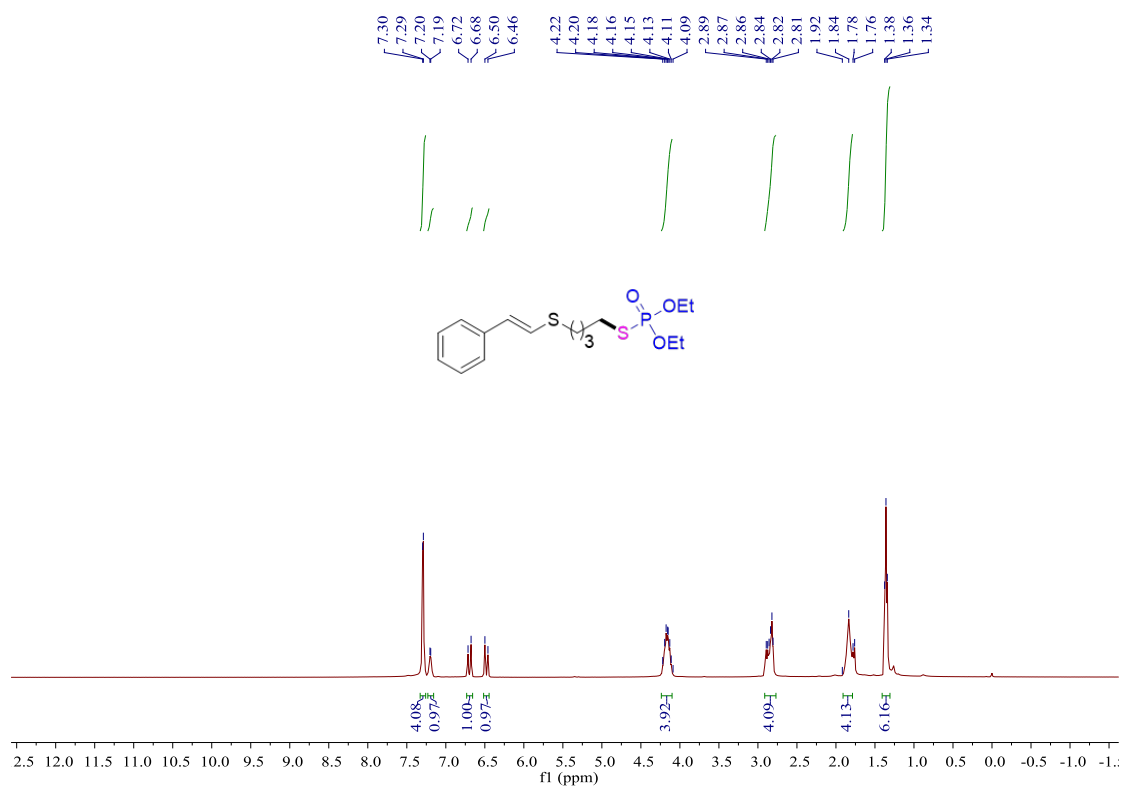

<sup>1</sup>H NMR (400 MHz, CDCl<sub>3</sub>) spectra of **3aa**

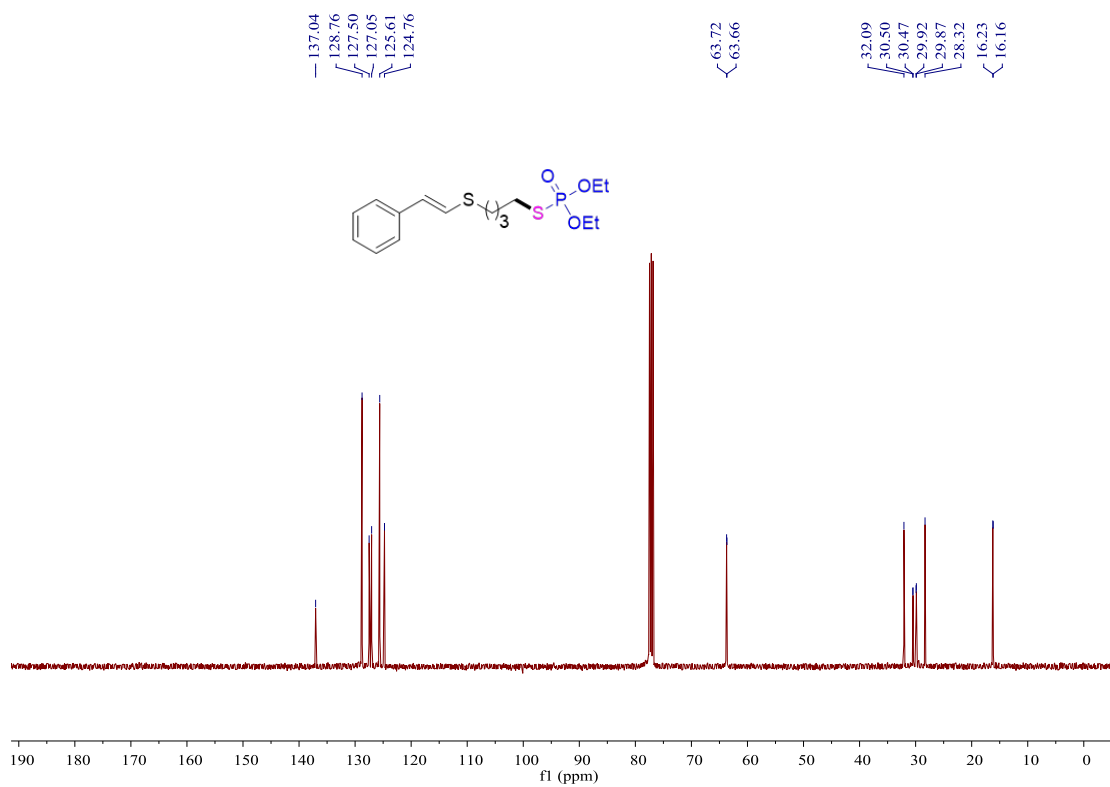

<sup>13</sup>C NMR (101 MHz, CDCl<sub>3</sub>) spectra of **3aa**

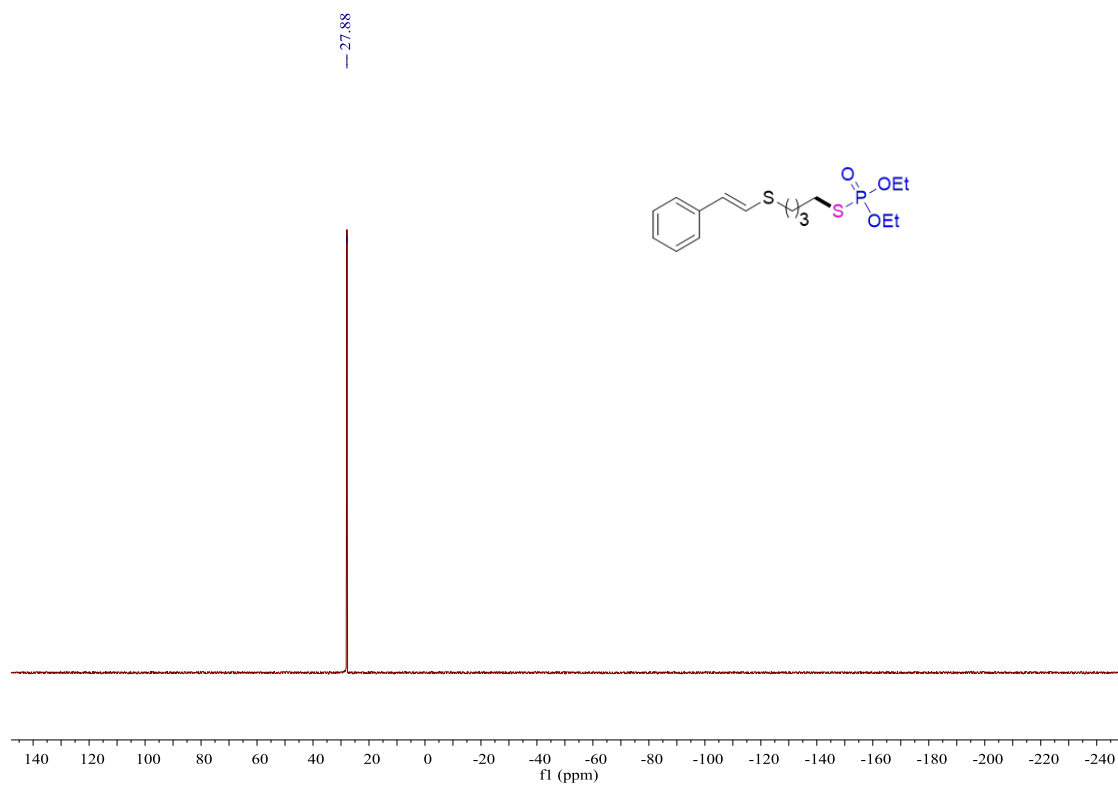

<sup>31</sup>P NMR (162 MHz, CDCl<sub>3</sub>) spectra of **3aa**



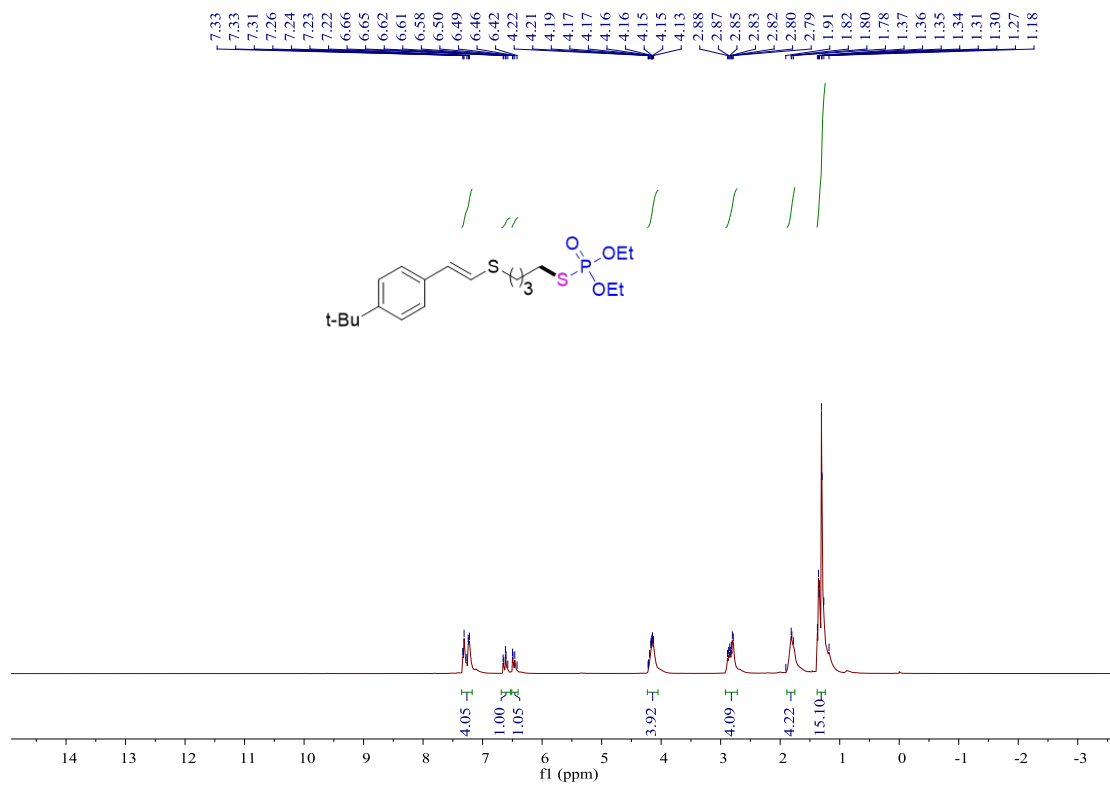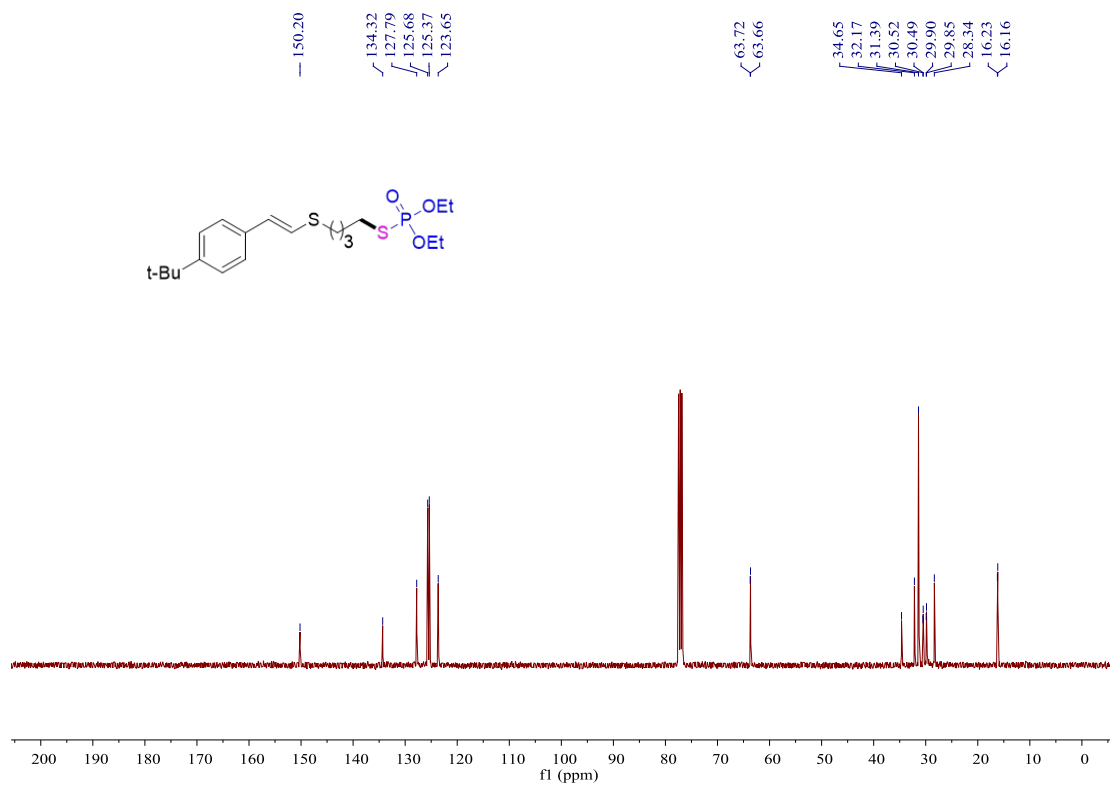

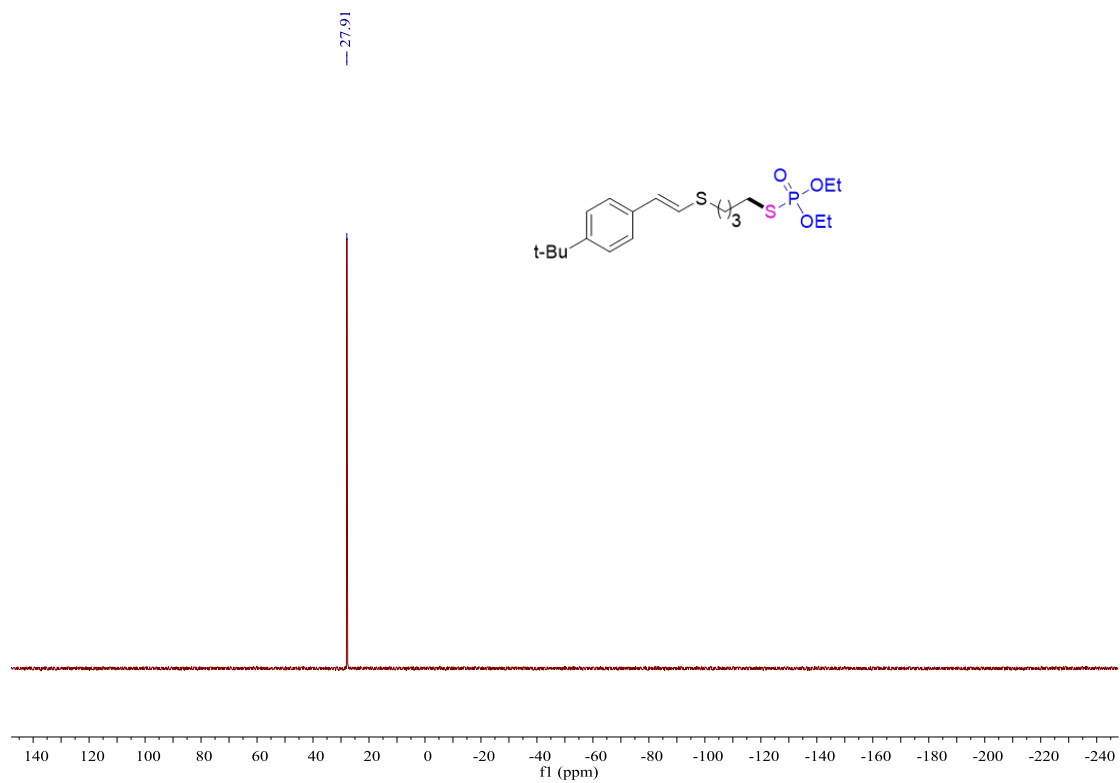

<sup>31</sup>P NMR (162 MHz, CDCl<sub>3</sub>) spectra of **3ba**

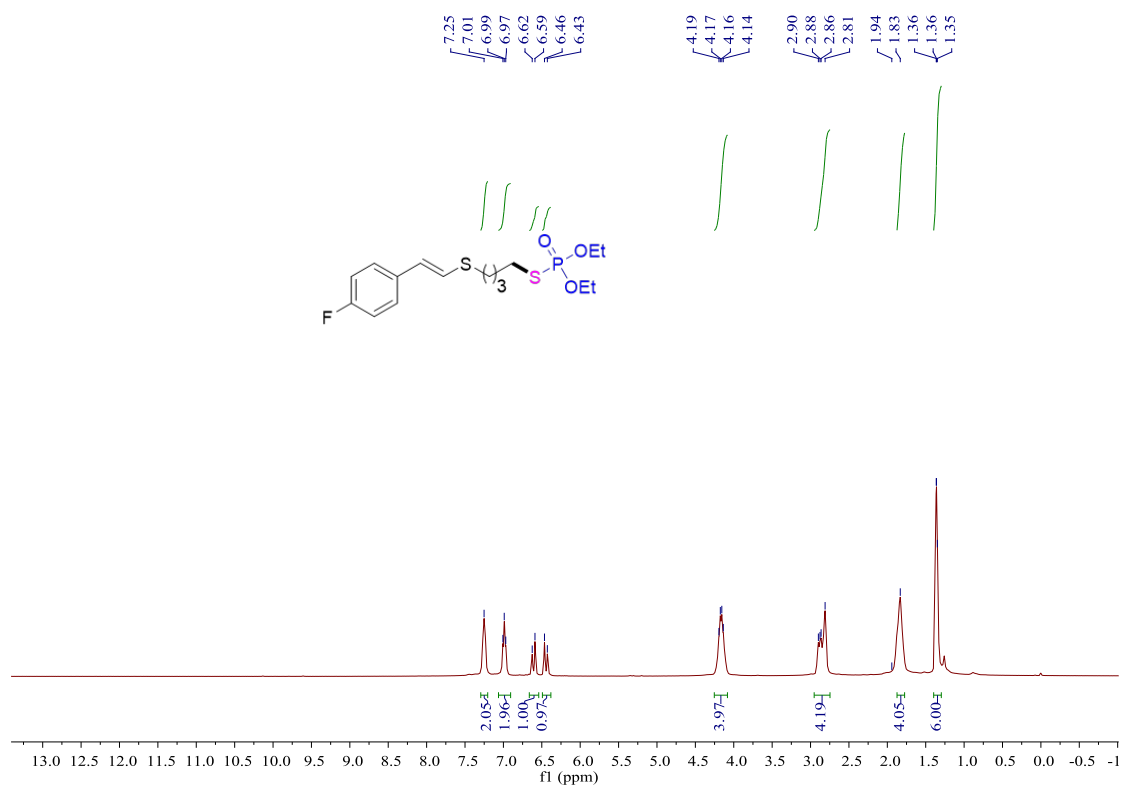

<sup>1</sup>H NMR (400 MHz, CDCl<sub>3</sub>) spectra of **3ca**

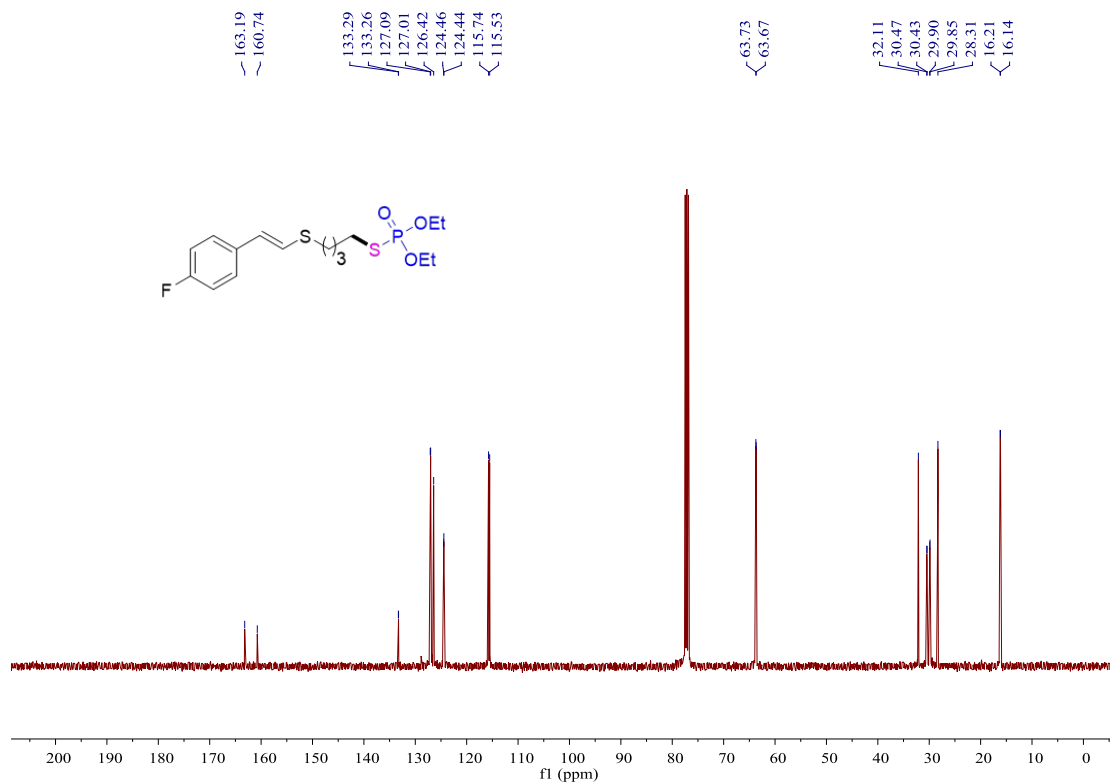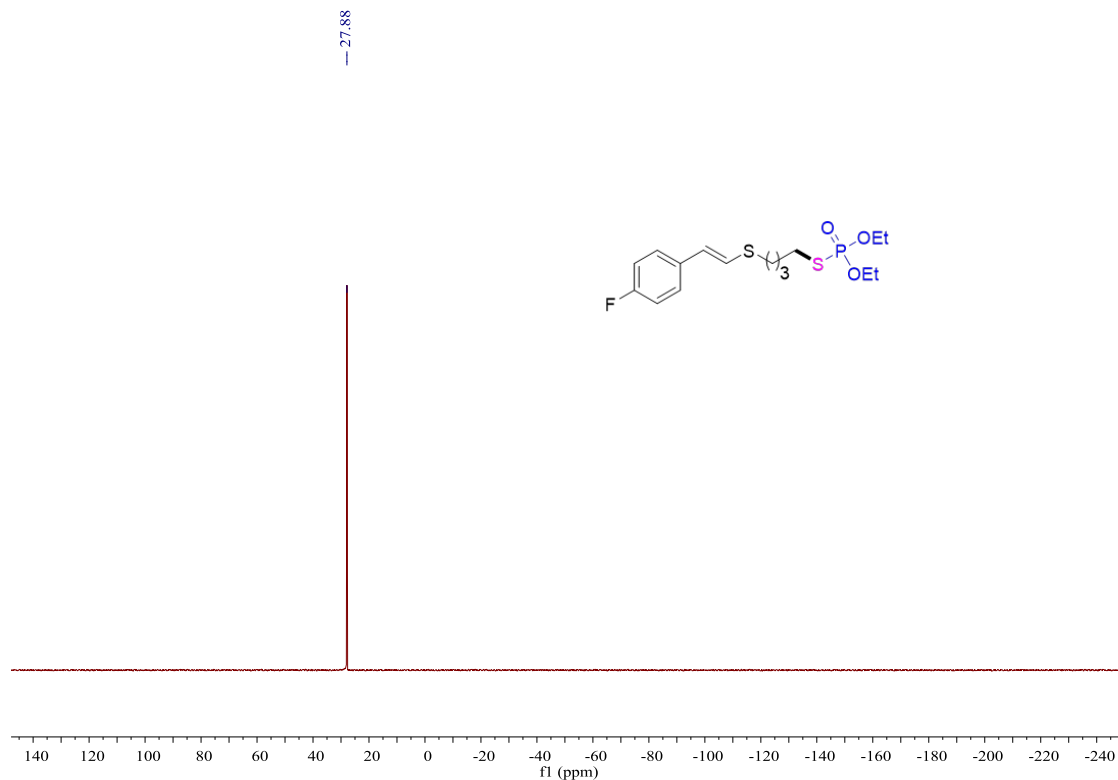

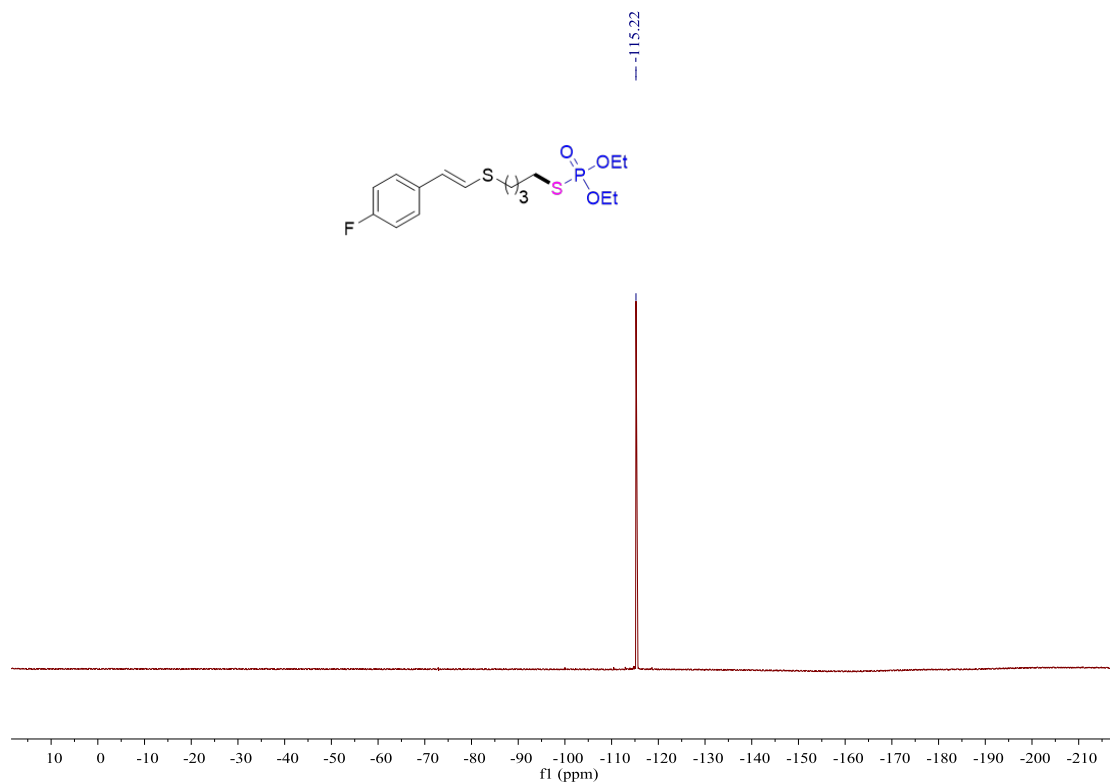

<sup>19</sup>F NMR (376 MHz, CDCl<sub>3</sub>) spectra of **3ca**

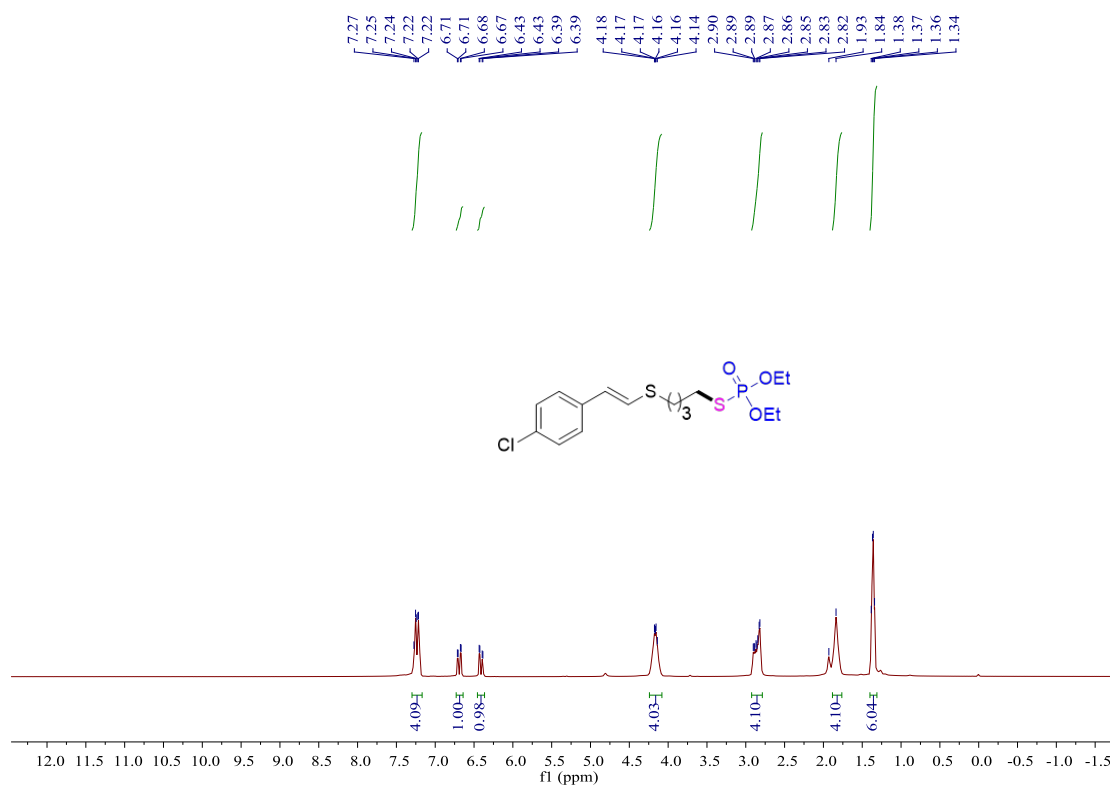

<sup>1</sup>H NMR (400 MHz, CDCl<sub>3</sub>) spectra of **3da**

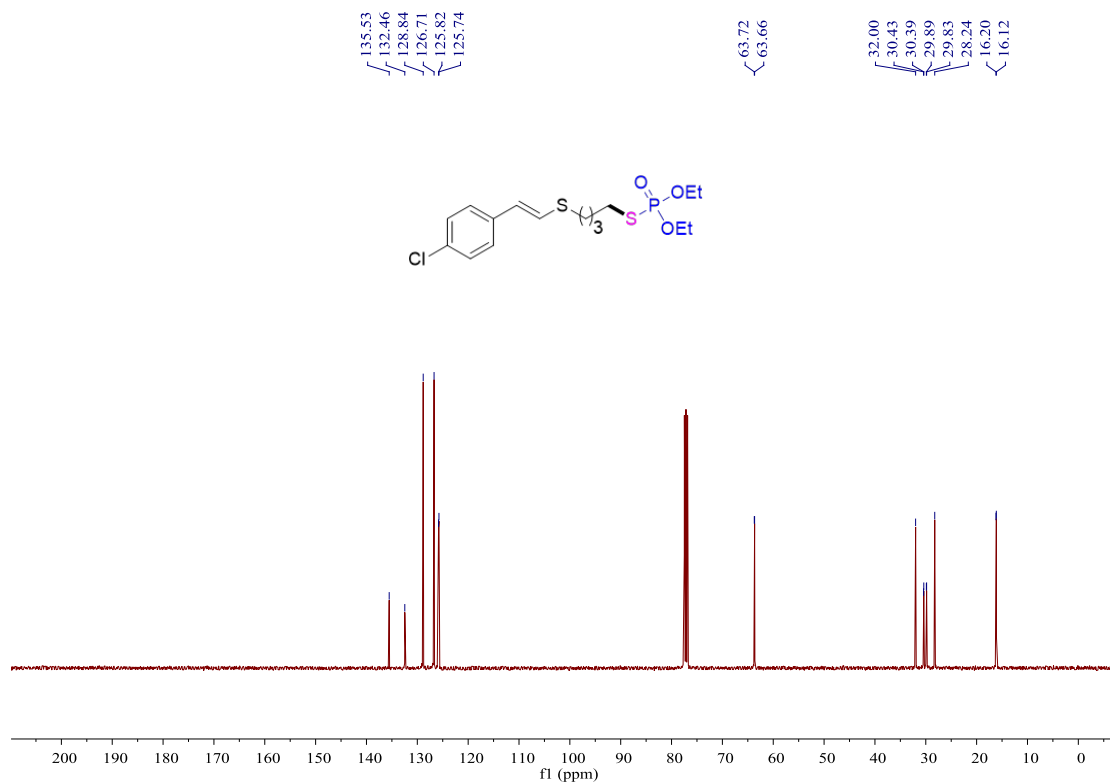

$^{13}\text{C}$  NMR (101 MHz,  $\text{CDCl}_3$ ) spectra of **3da**

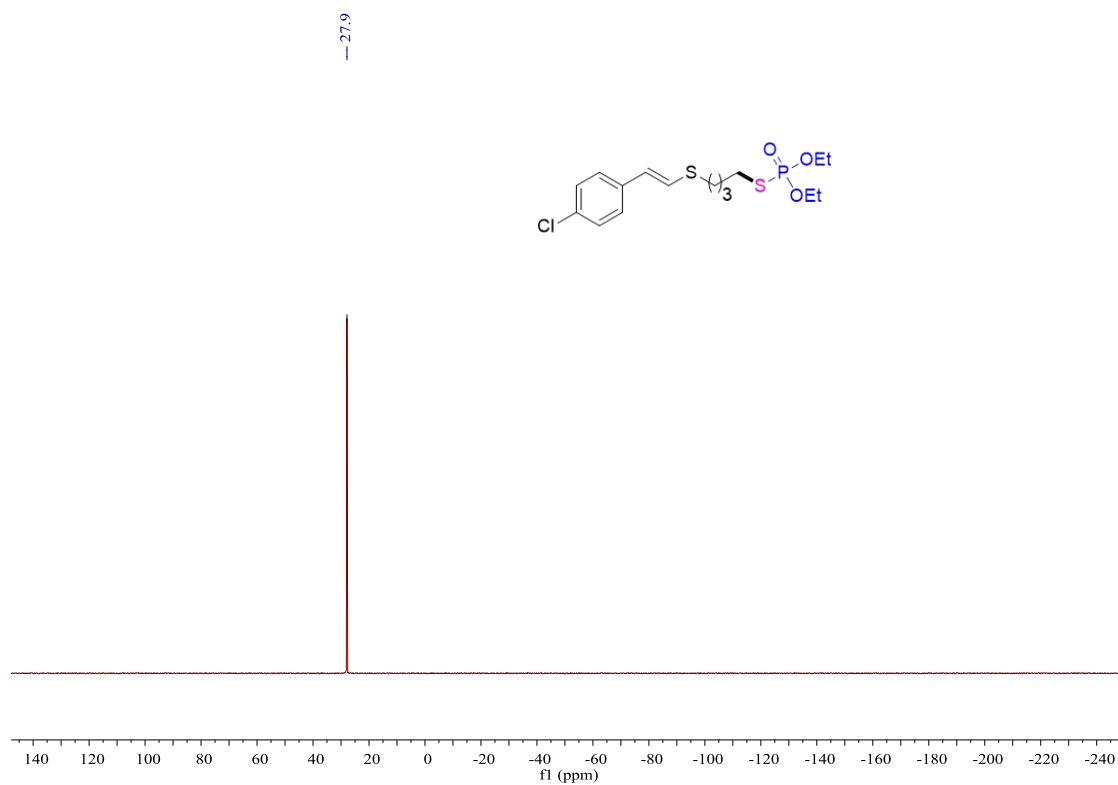

$^{31}\text{P}$  NMR (162 MHz,  $\text{CDCl}_3$ ) spectra of **3da**

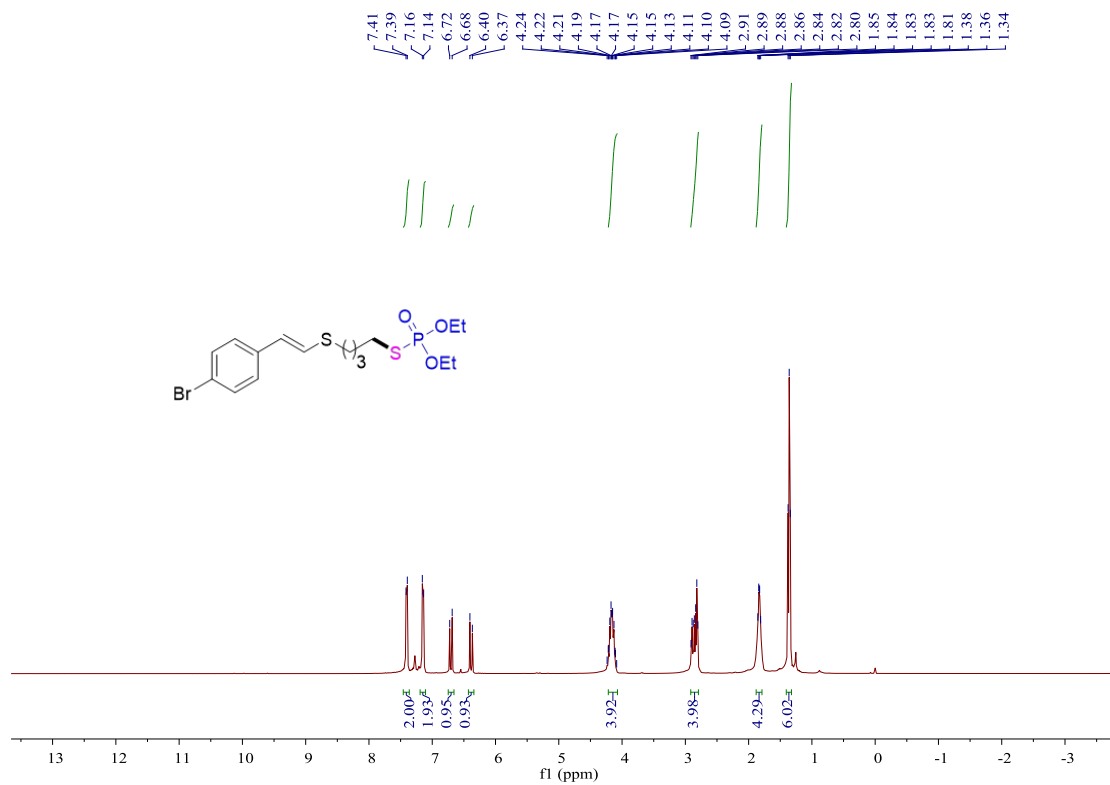

<sup>1</sup>H NMR (400 MHz, CDCl<sub>3</sub>) spectra of **3ea**

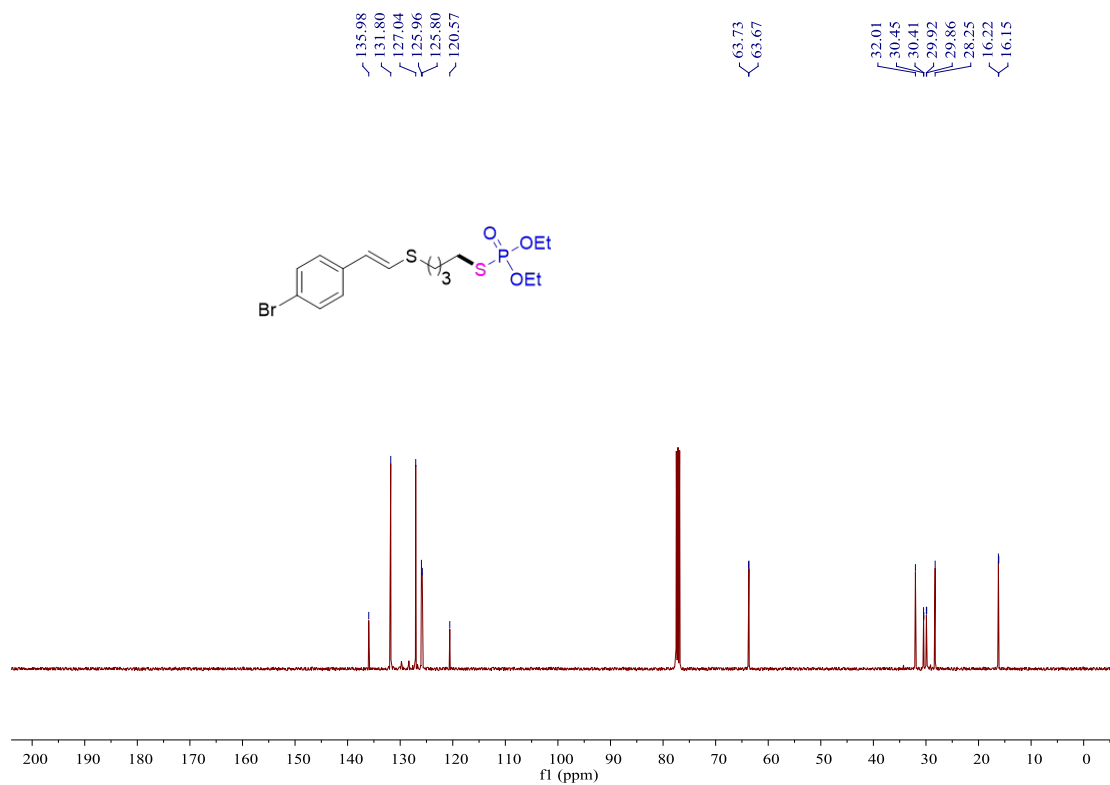

<sup>13</sup>C NMR (101 MHz, CDCl<sub>3</sub>) spectra of **3ea**

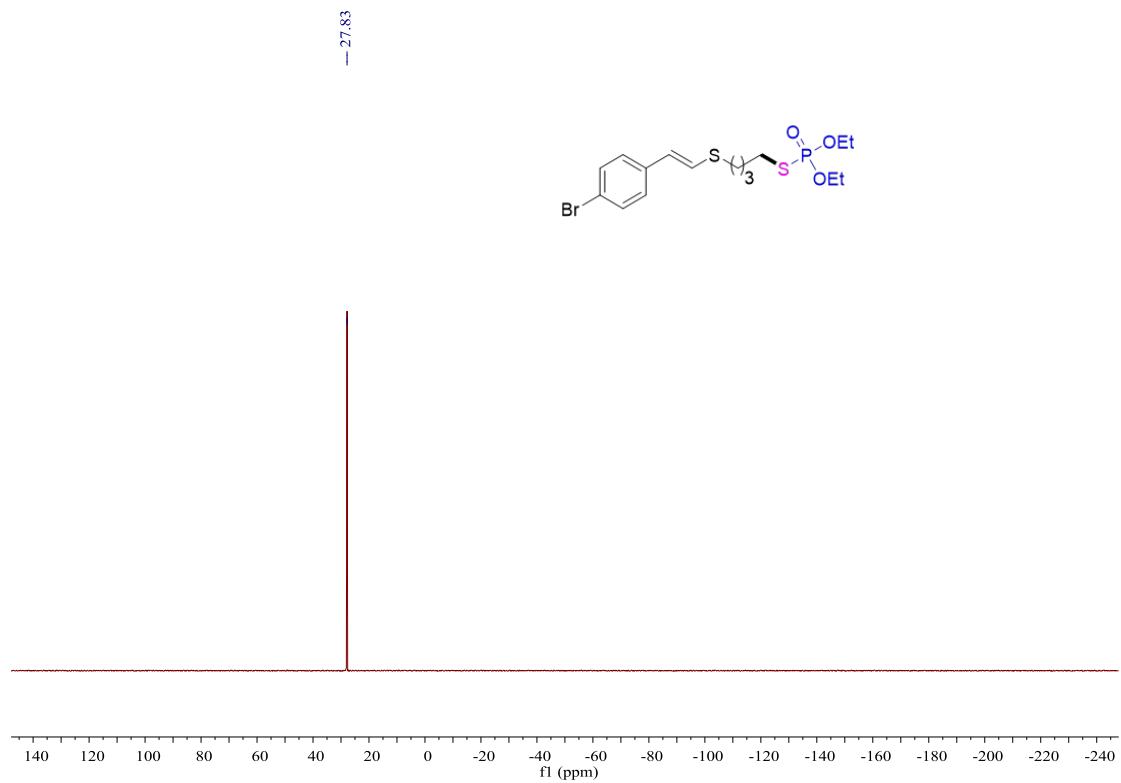

$^{31}\text{P}$  NMR (162 MHz,  $\text{CDCl}_3$ ) spectra of **3ea**

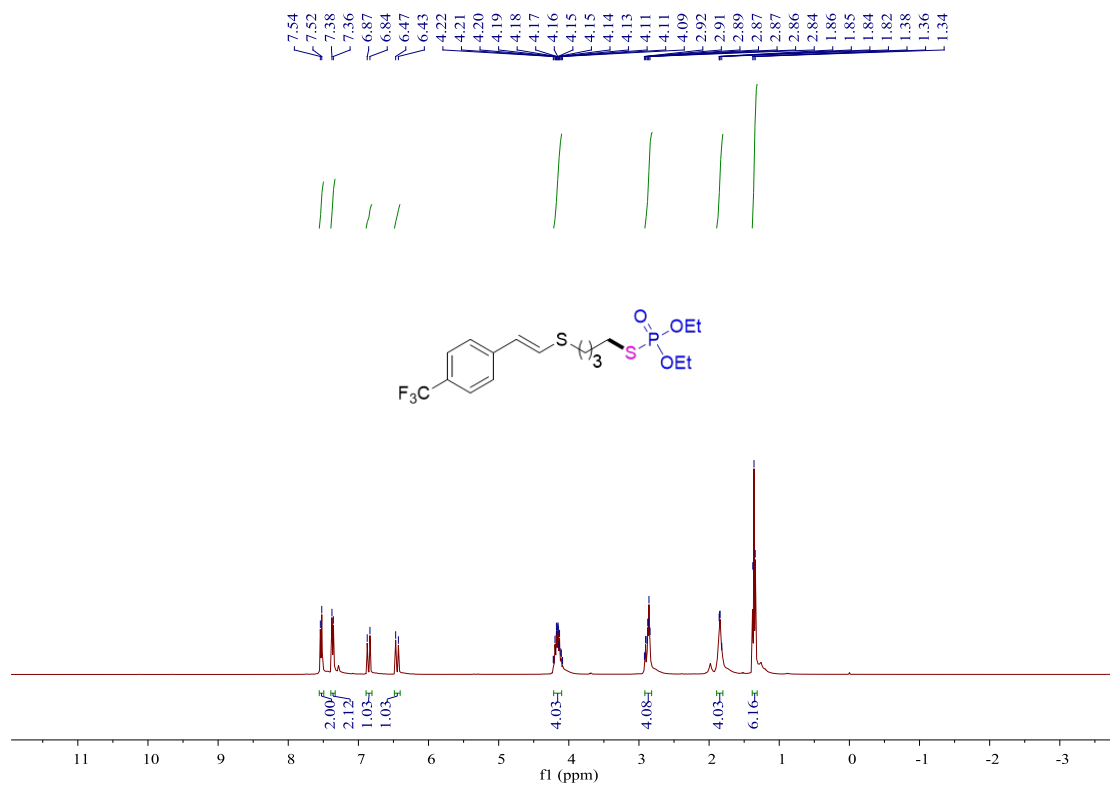

$^1\text{H}$  NMR (400 MHz,  $\text{CDCl}_3$ ) spectra of **3fa**

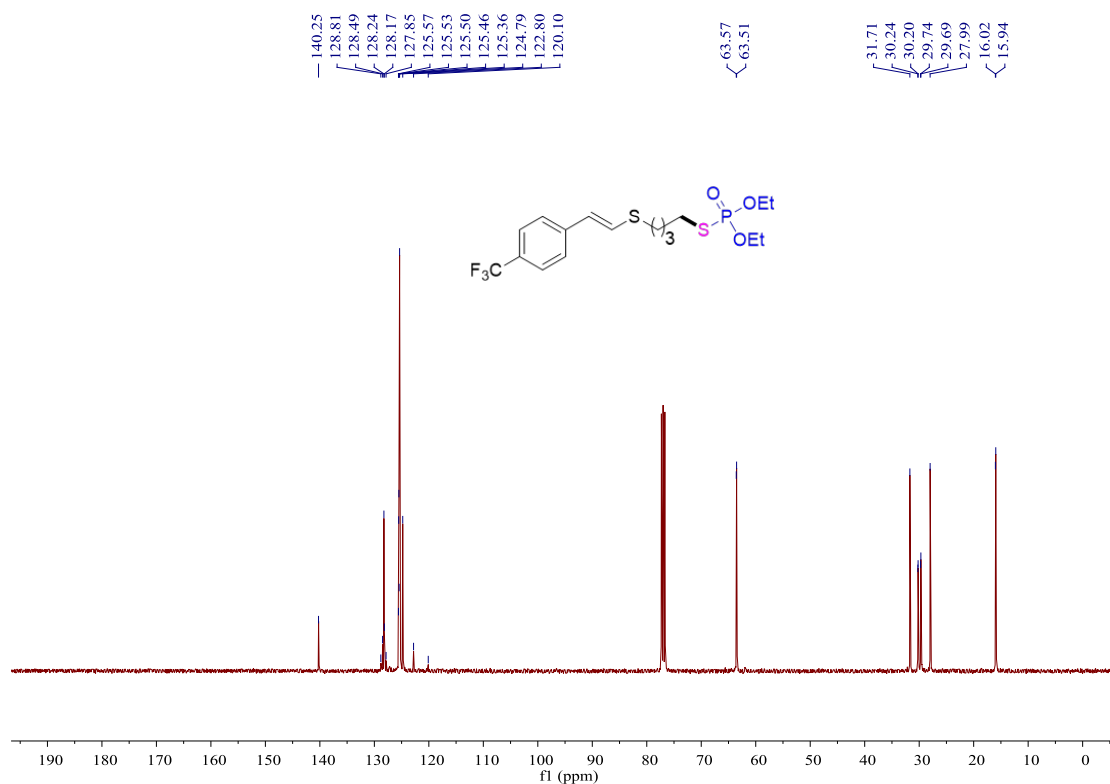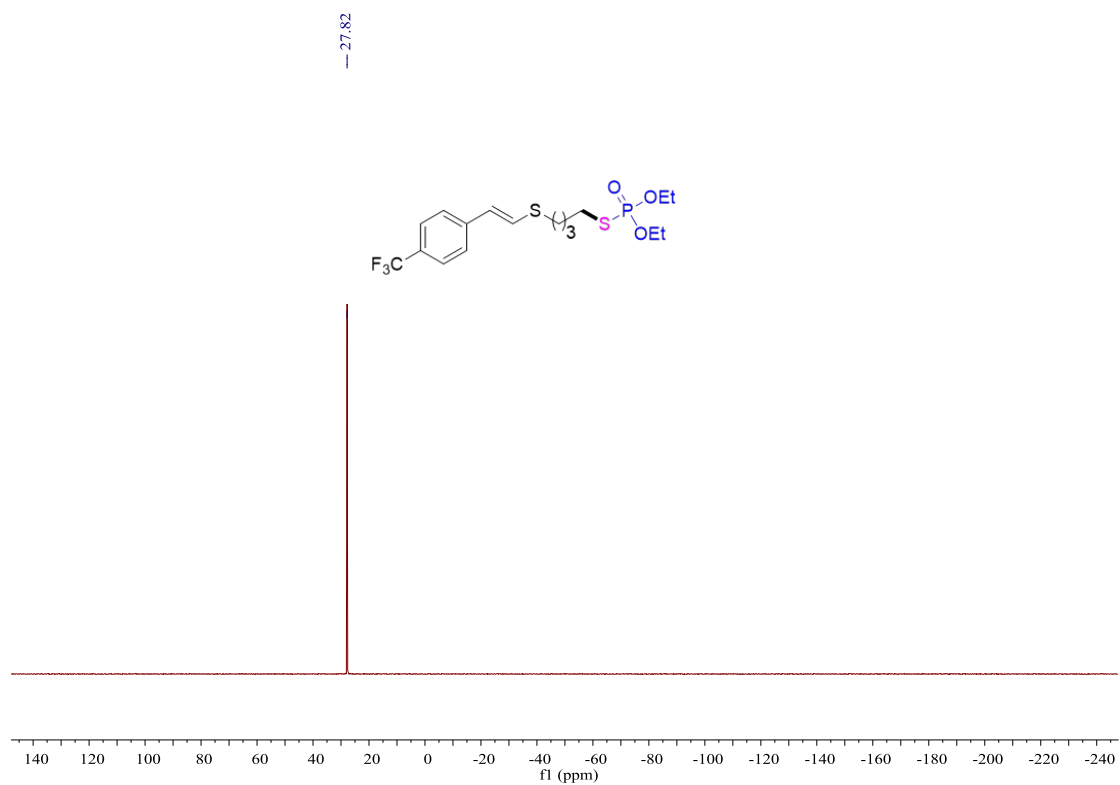



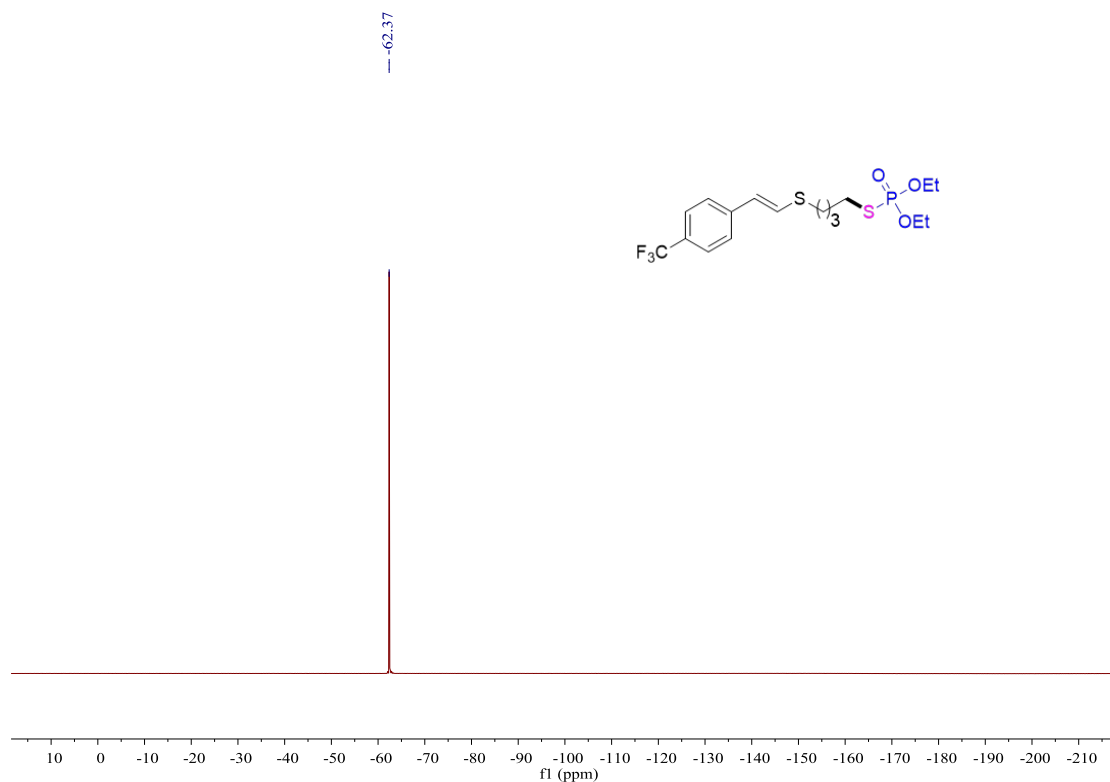

<sup>19</sup>F NMR (376 MHz, CDCl<sub>3</sub>) spectra of **3fa**

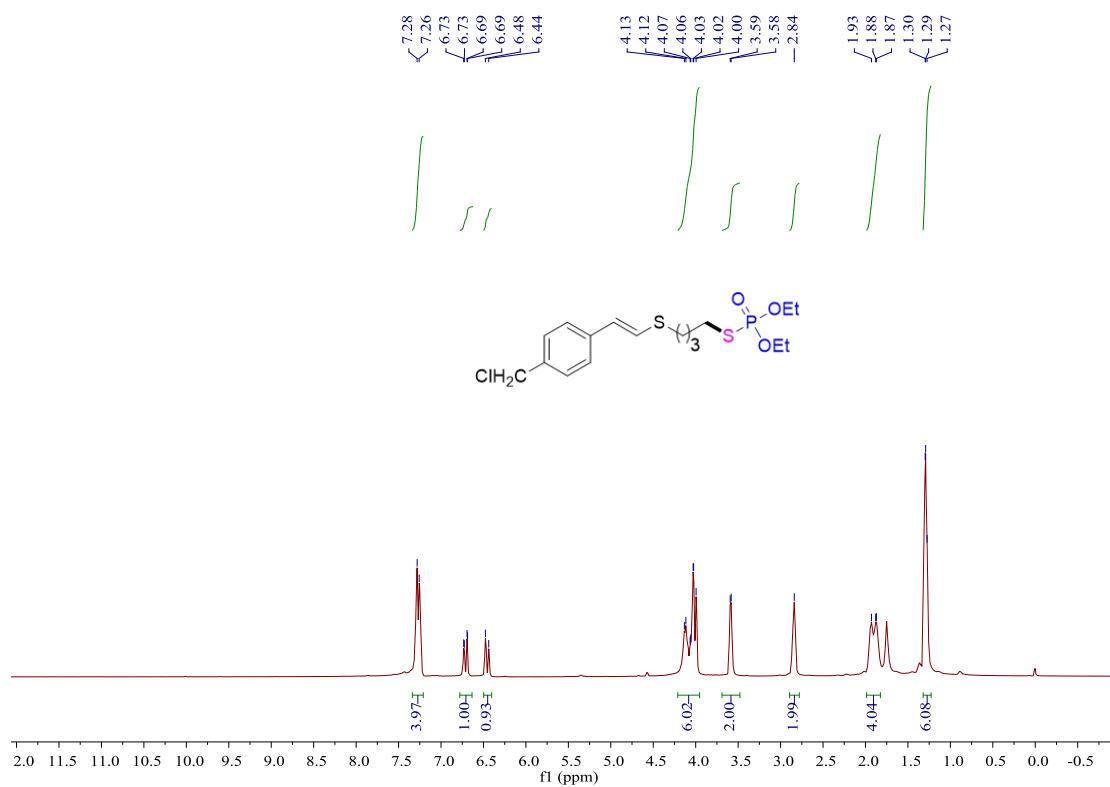

<sup>1</sup>H NMR (400 MHz, CDCl<sub>3</sub>) spectra of **3ga**

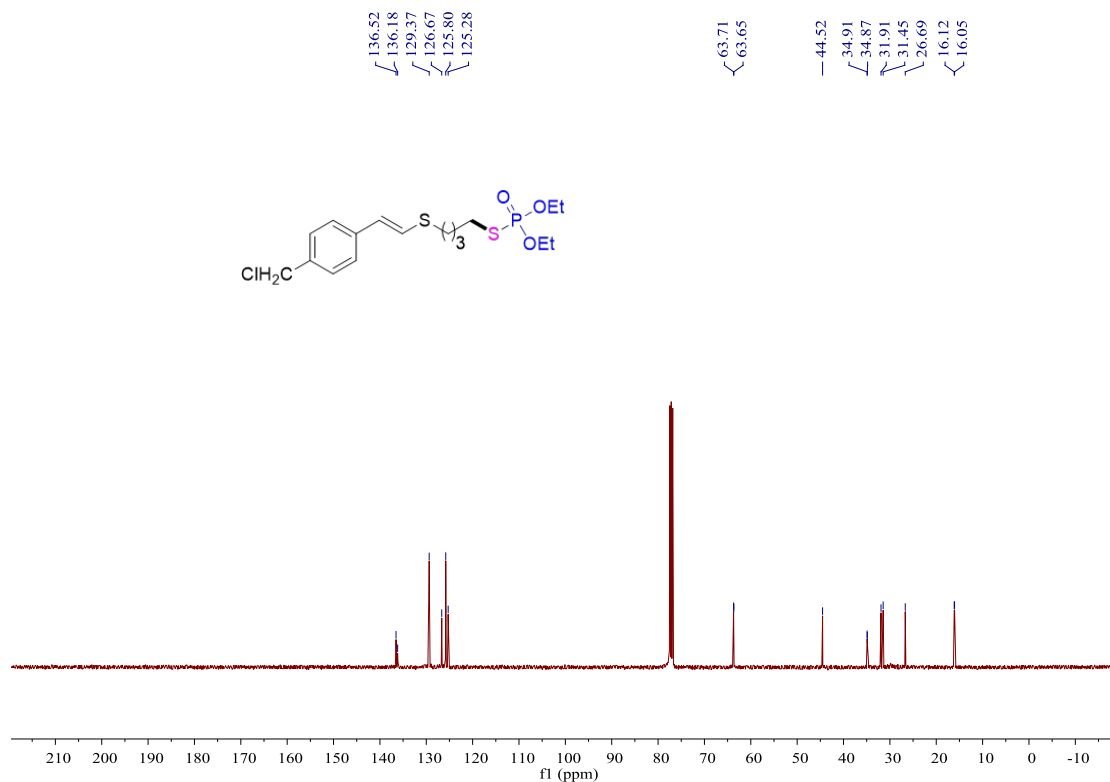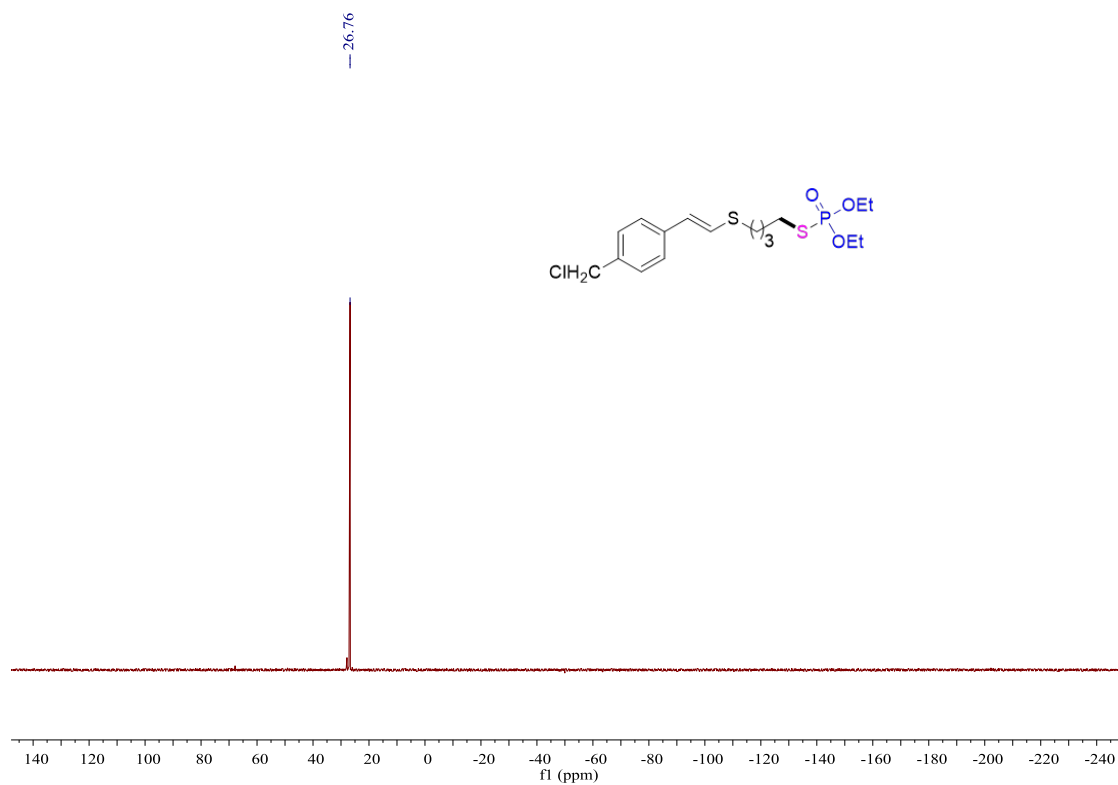

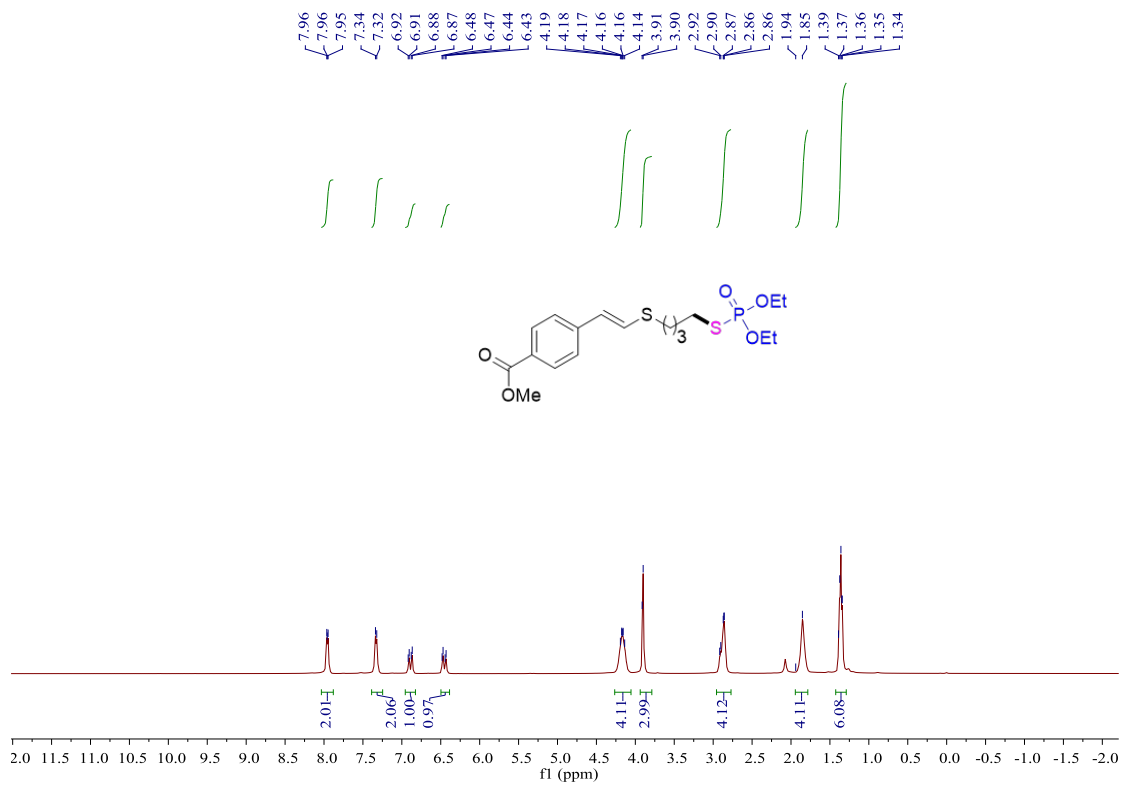

<sup>1</sup>H NMR (400 MHz, CDCl<sub>3</sub>) spectra of **3ha**

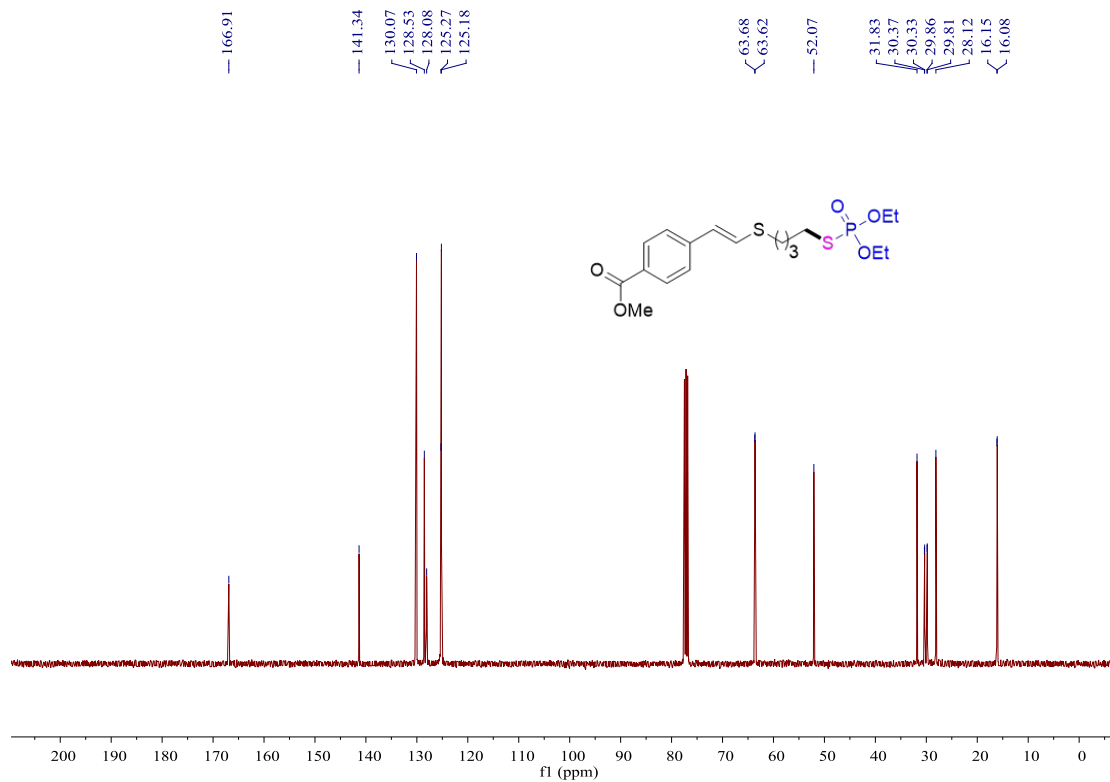

<sup>13</sup>C NMR (101 MHz, CDCl<sub>3</sub>) spectra of **3ha**

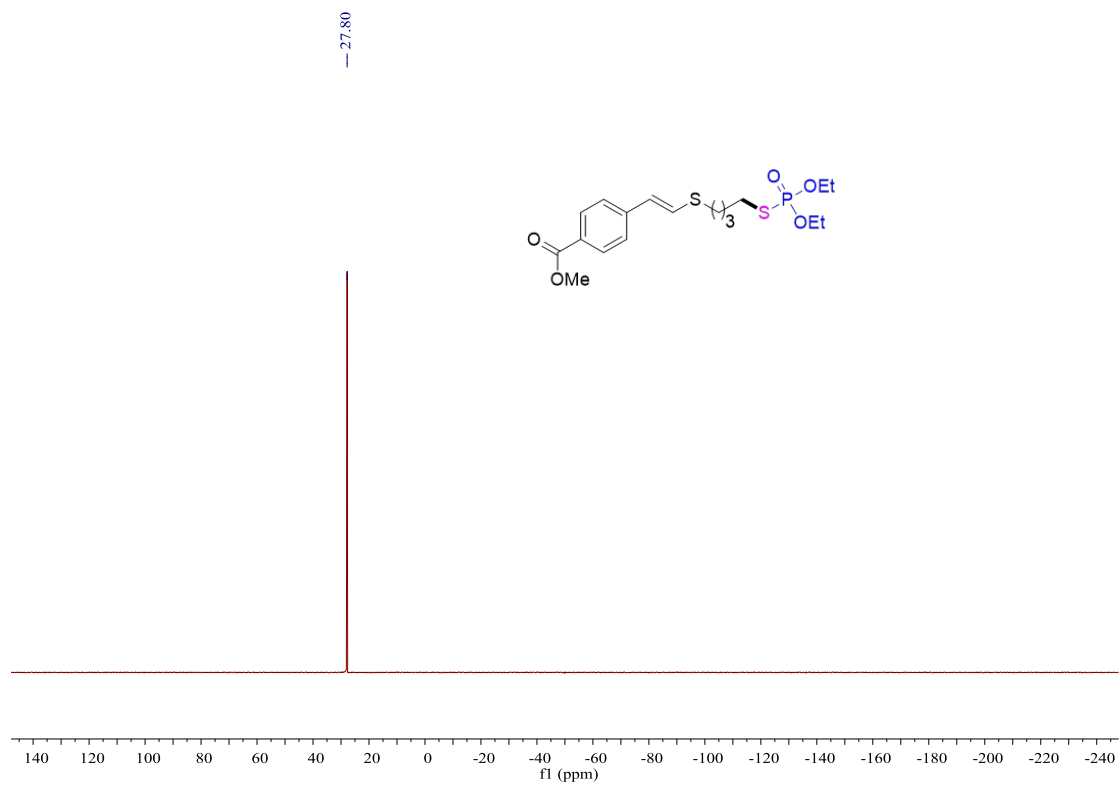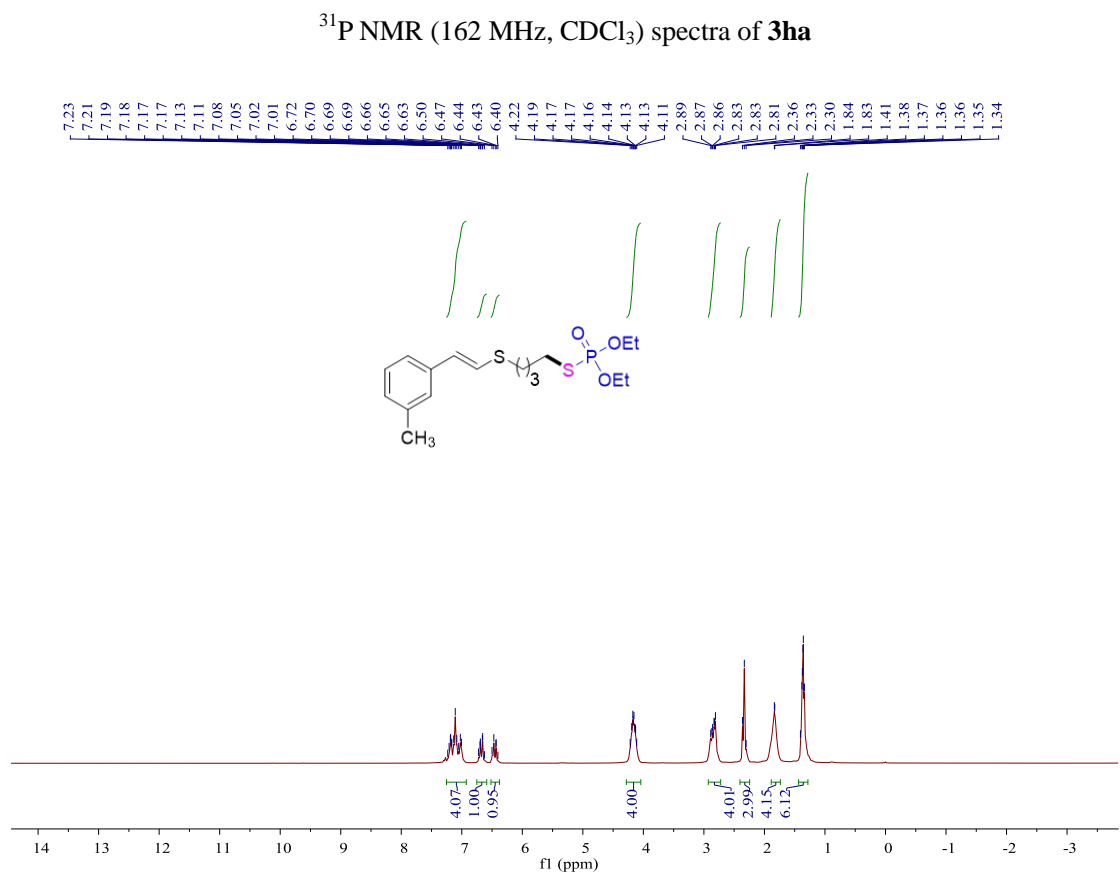

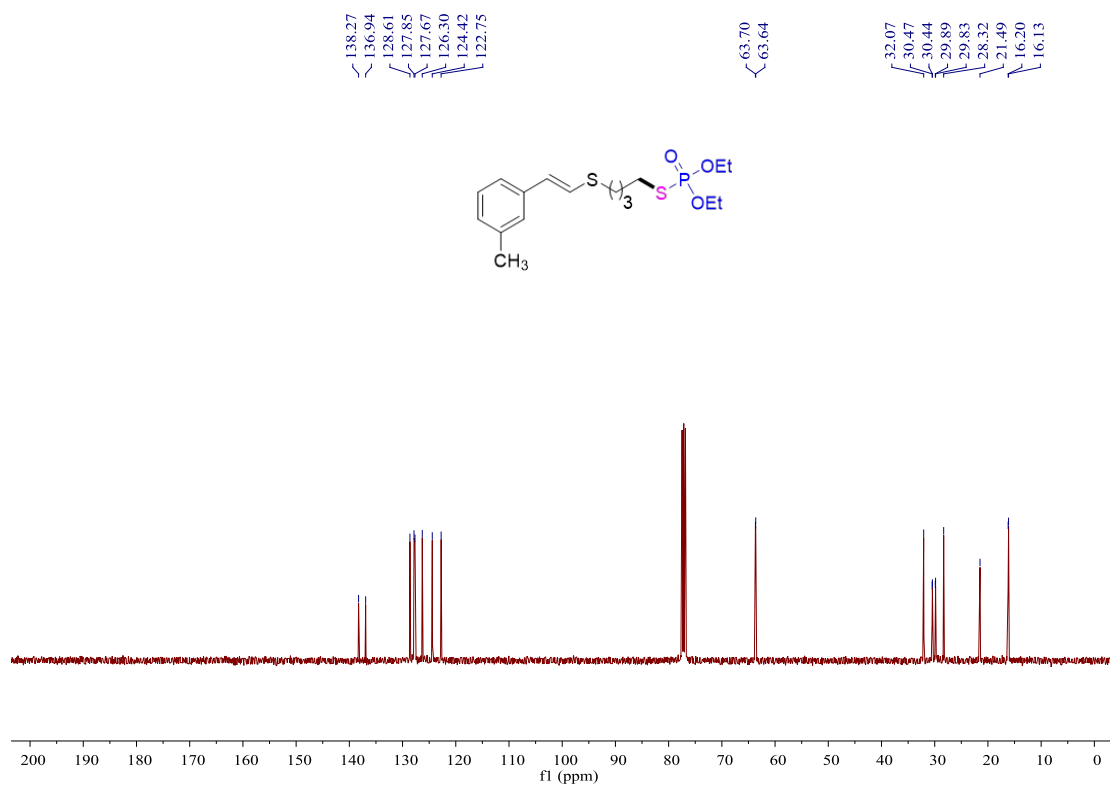

$^{13}\text{C}$  NMR (101 MHz,  $\text{CDCl}_3$ ) spectra of **3ia**

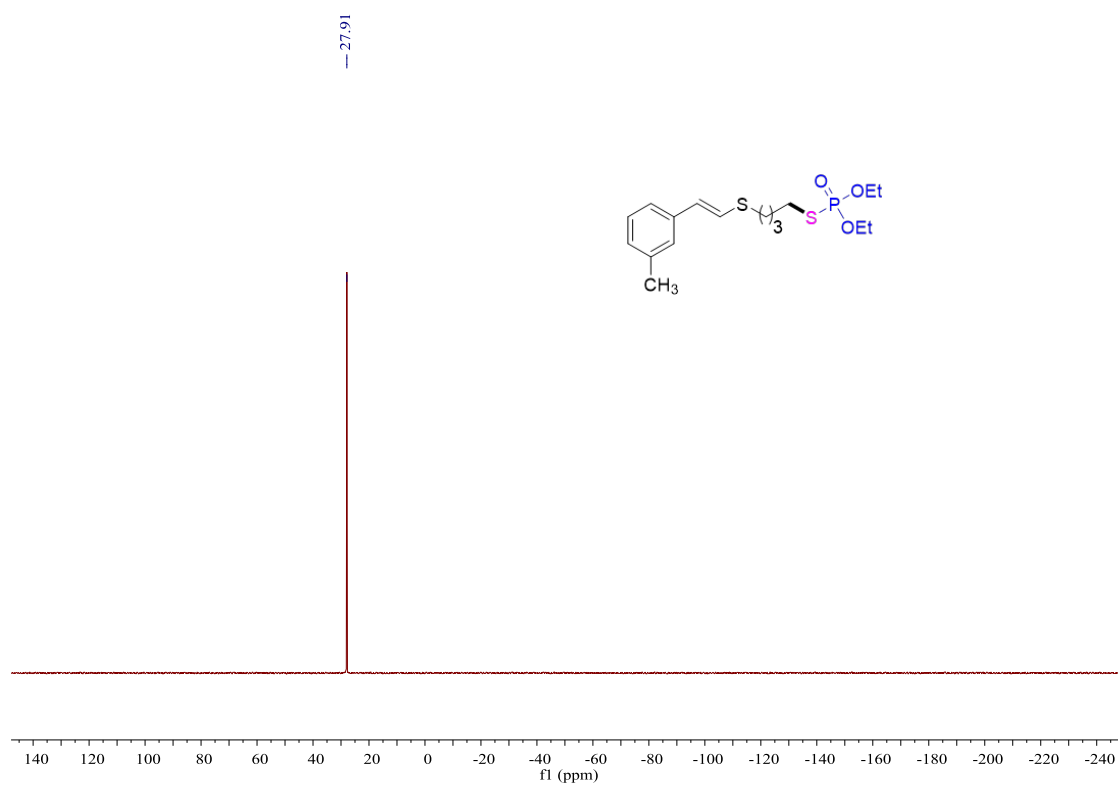

$^{31}\text{P}$  NMR (162 MHz,  $\text{CDCl}_3$ ) spectra of **3ia**

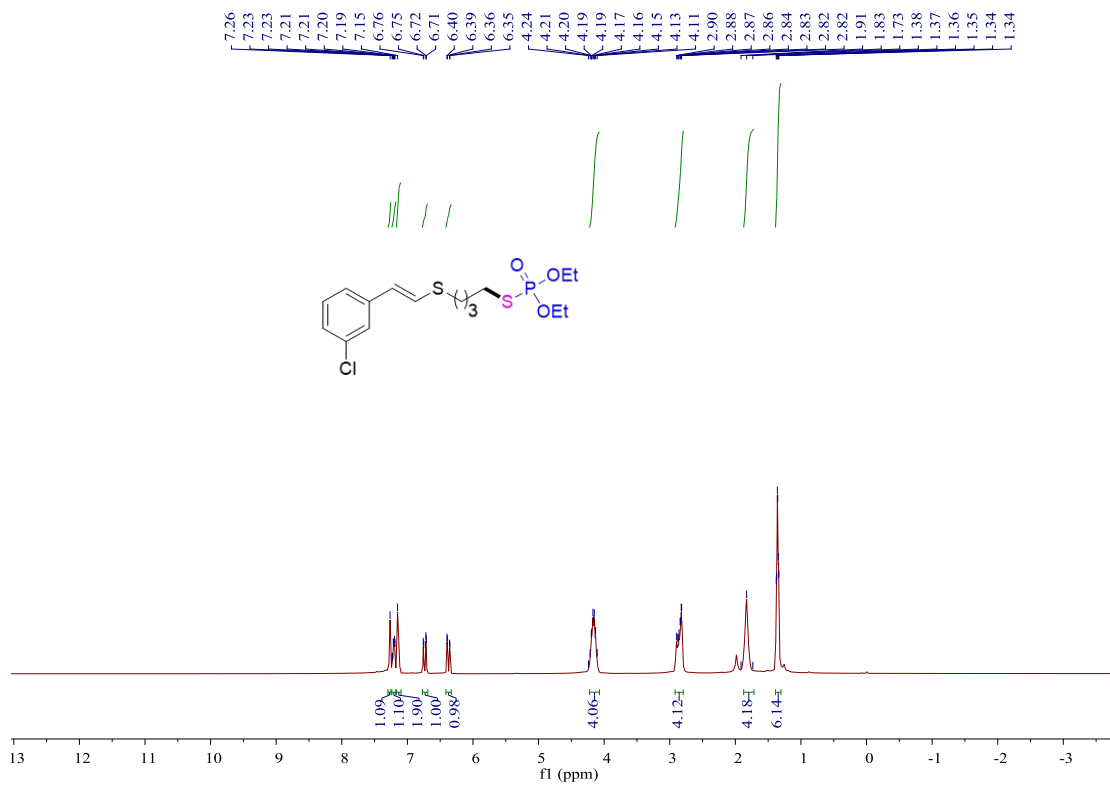

<sup>1</sup>H NMR (400 MHz, CDCl<sub>3</sub>) spectra of **3ja**

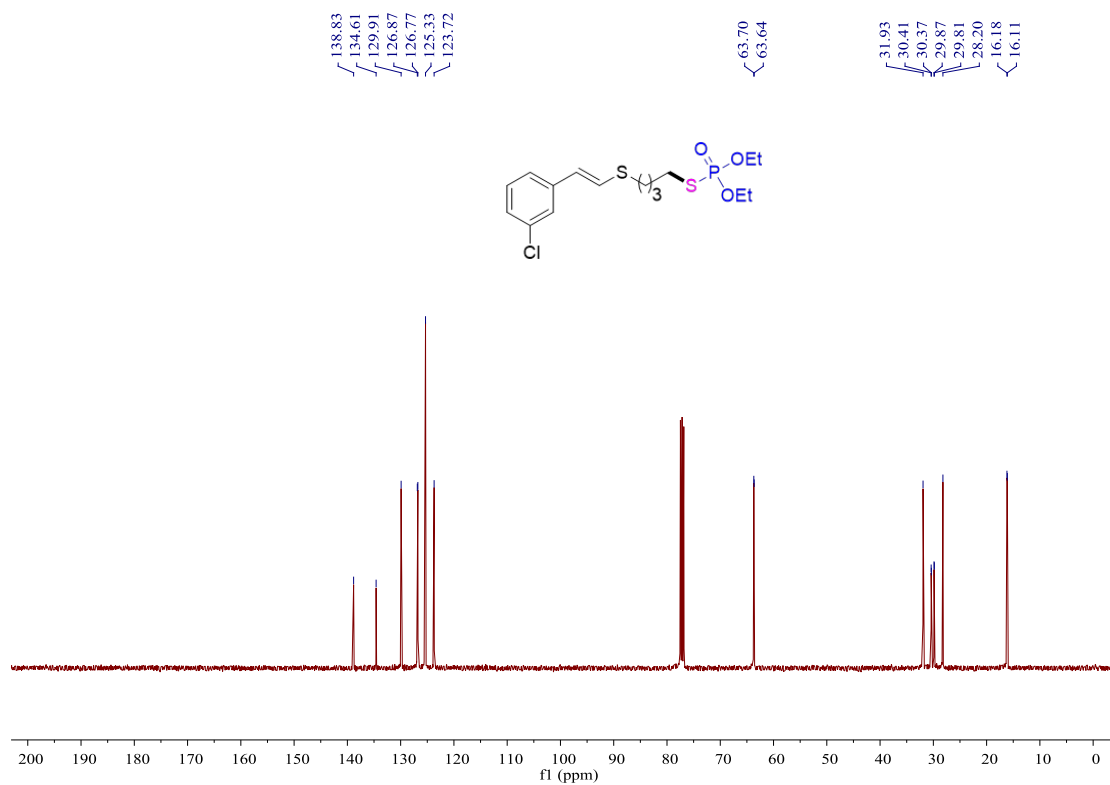

<sup>13</sup>C NMR (101 MHz, CDCl<sub>3</sub>) spectra of **3ja**

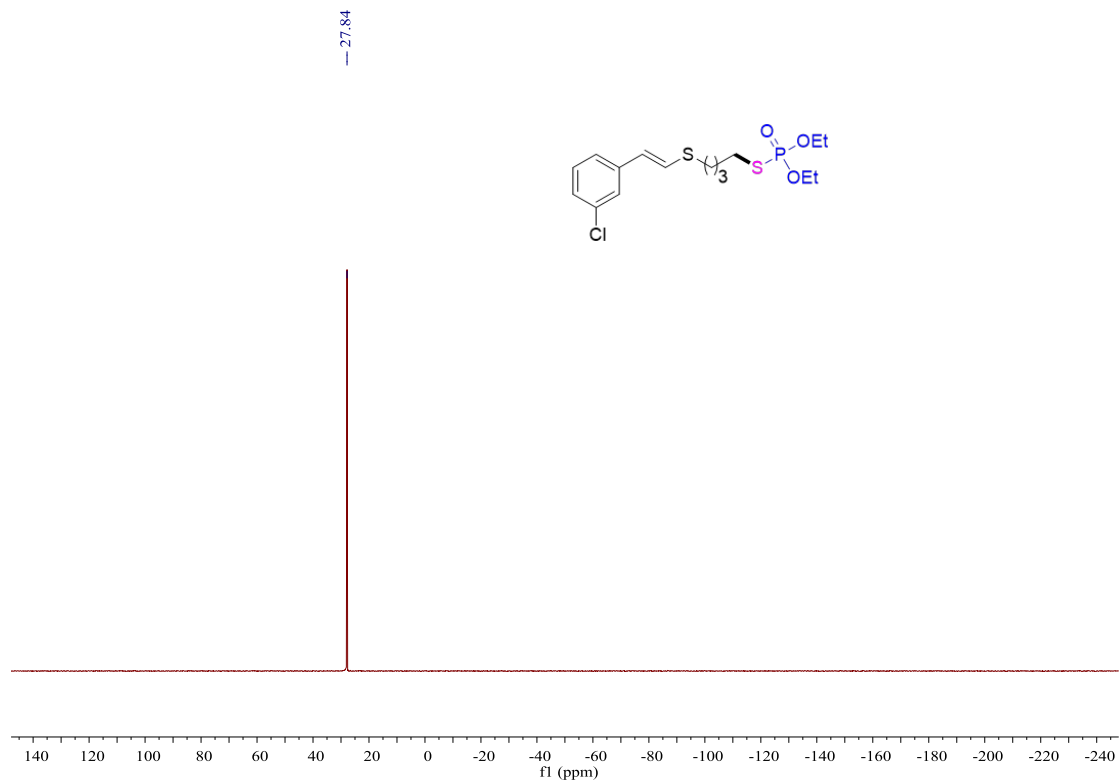

<sup>31</sup>P NMR (162 MHz, CDCl<sub>3</sub>) spectra of **3ja**

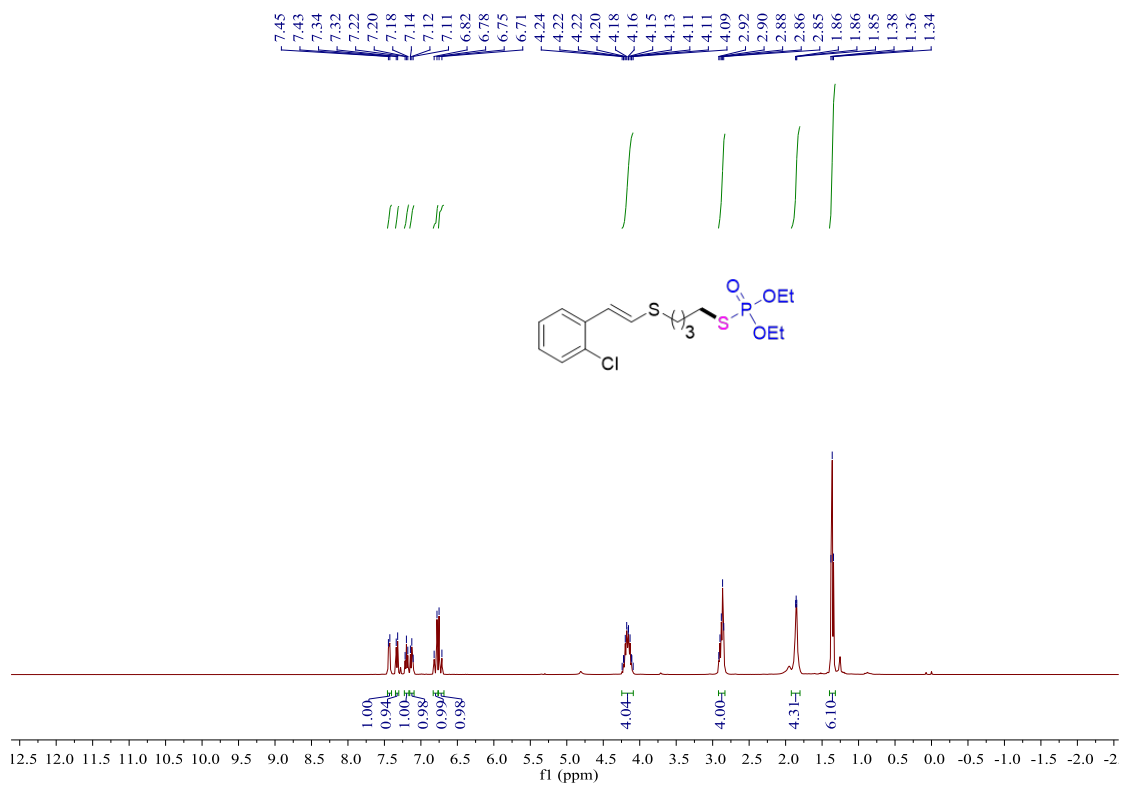

<sup>1</sup>H NMR (400 MHz, CDCl<sub>3</sub>) spectra of **3ka**

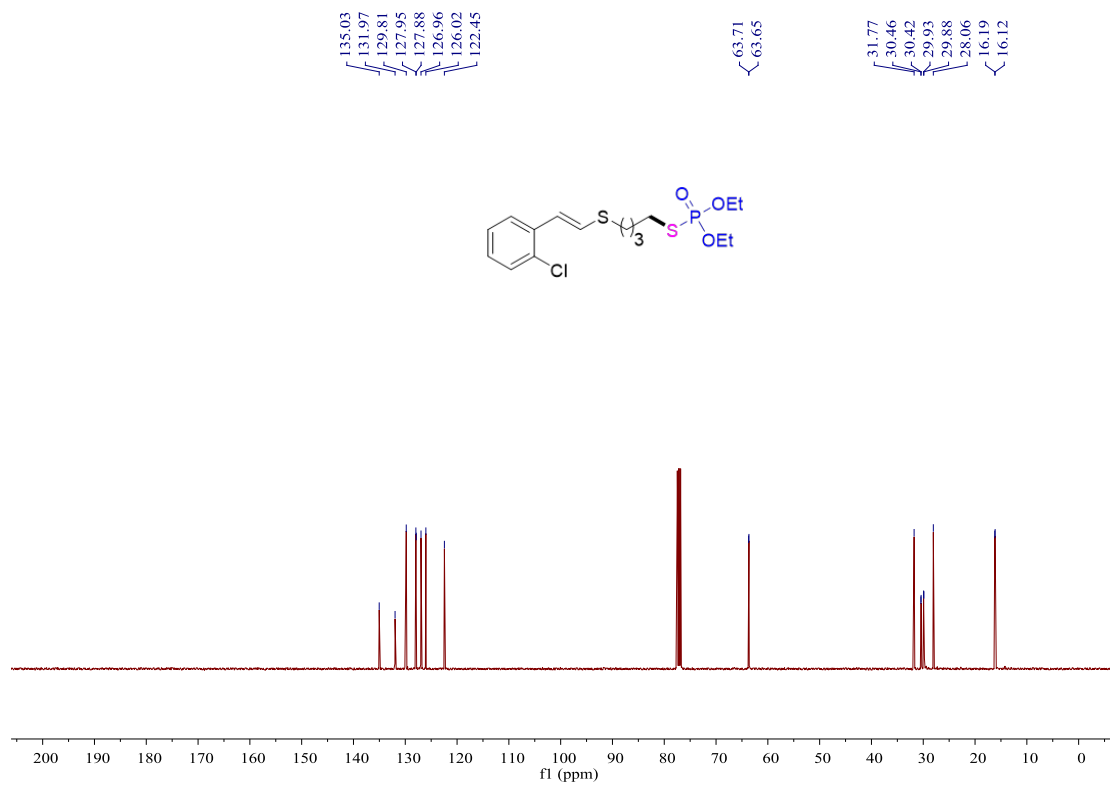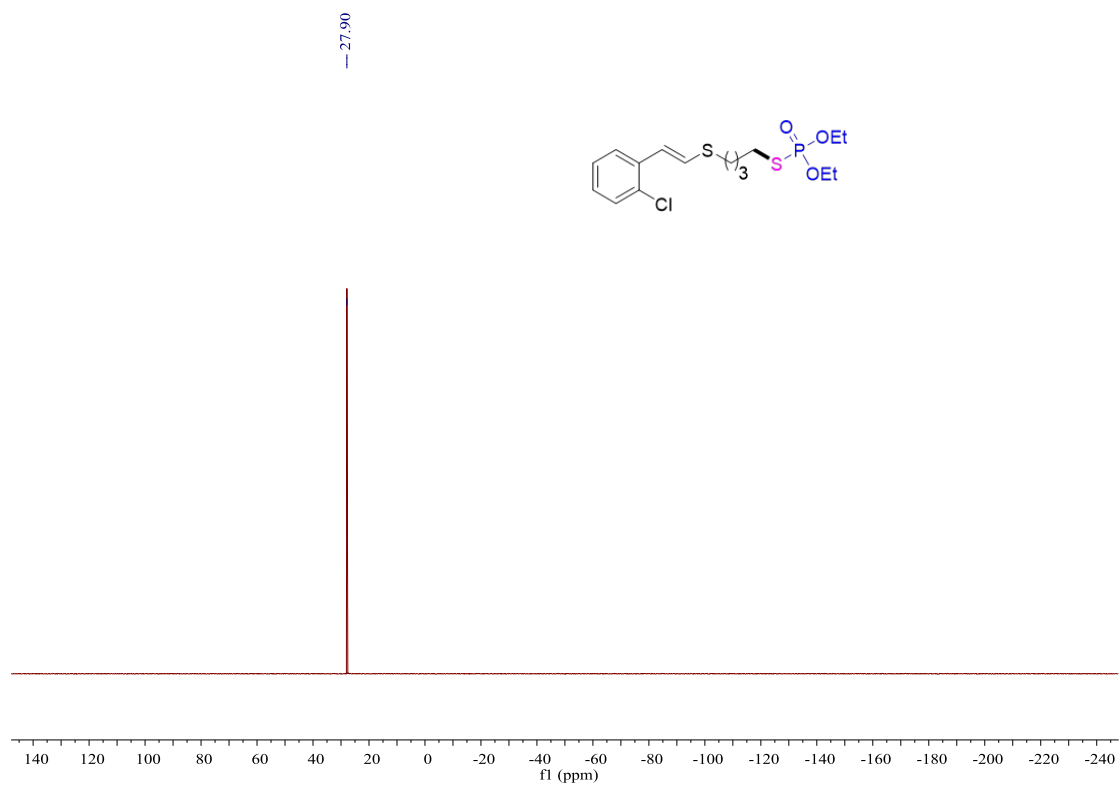



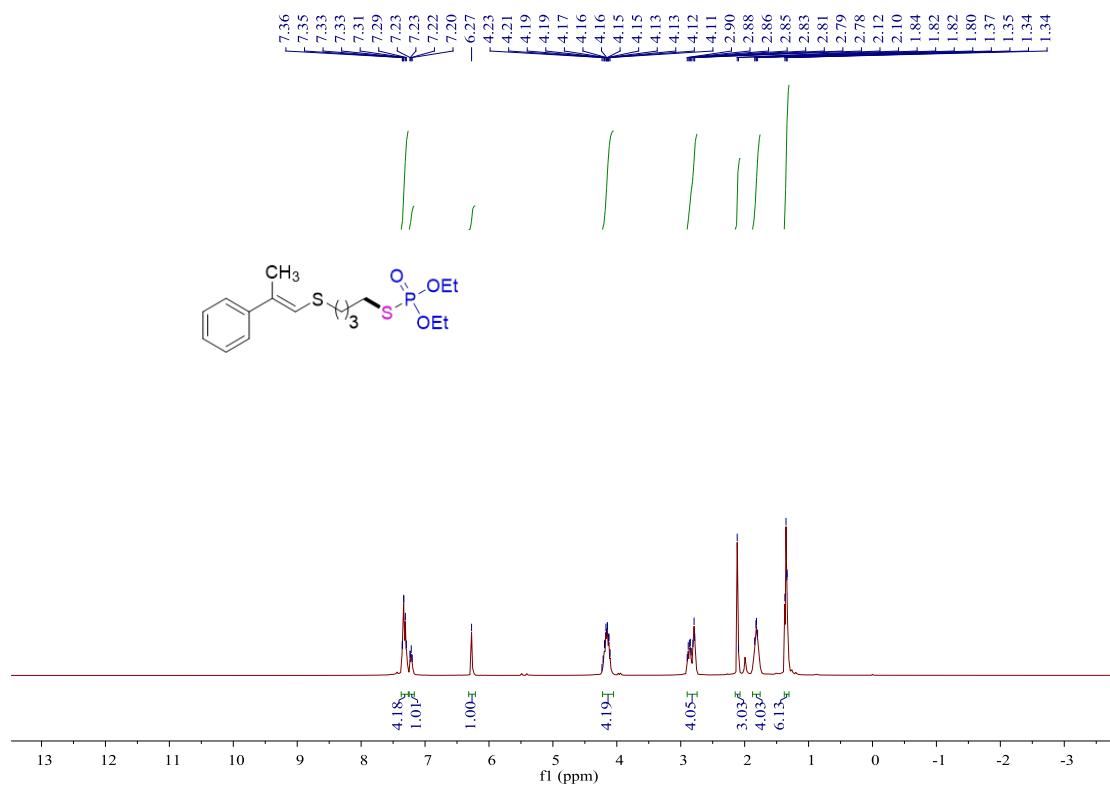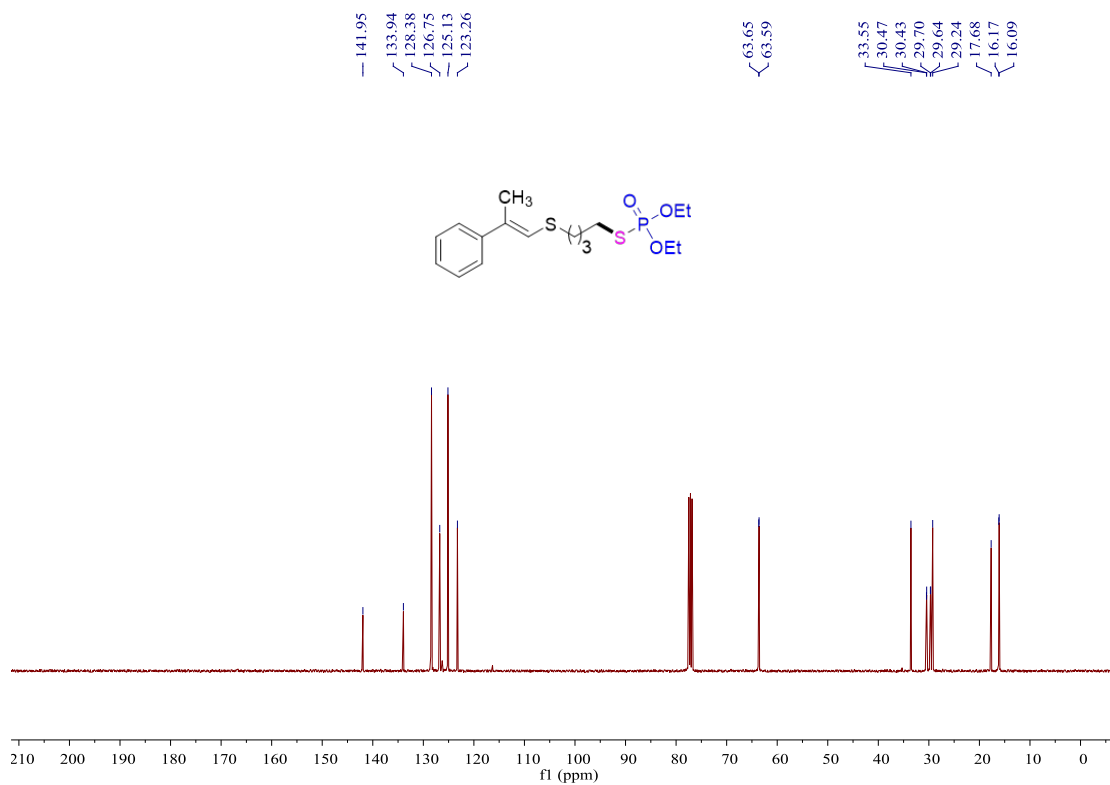

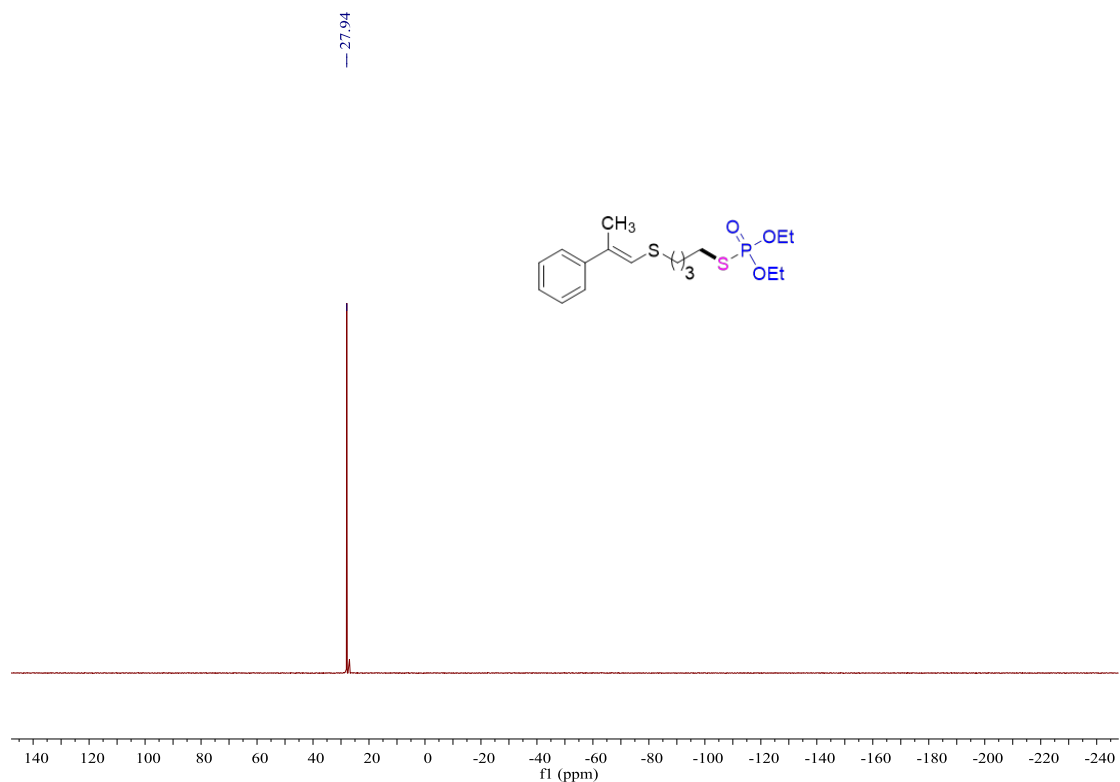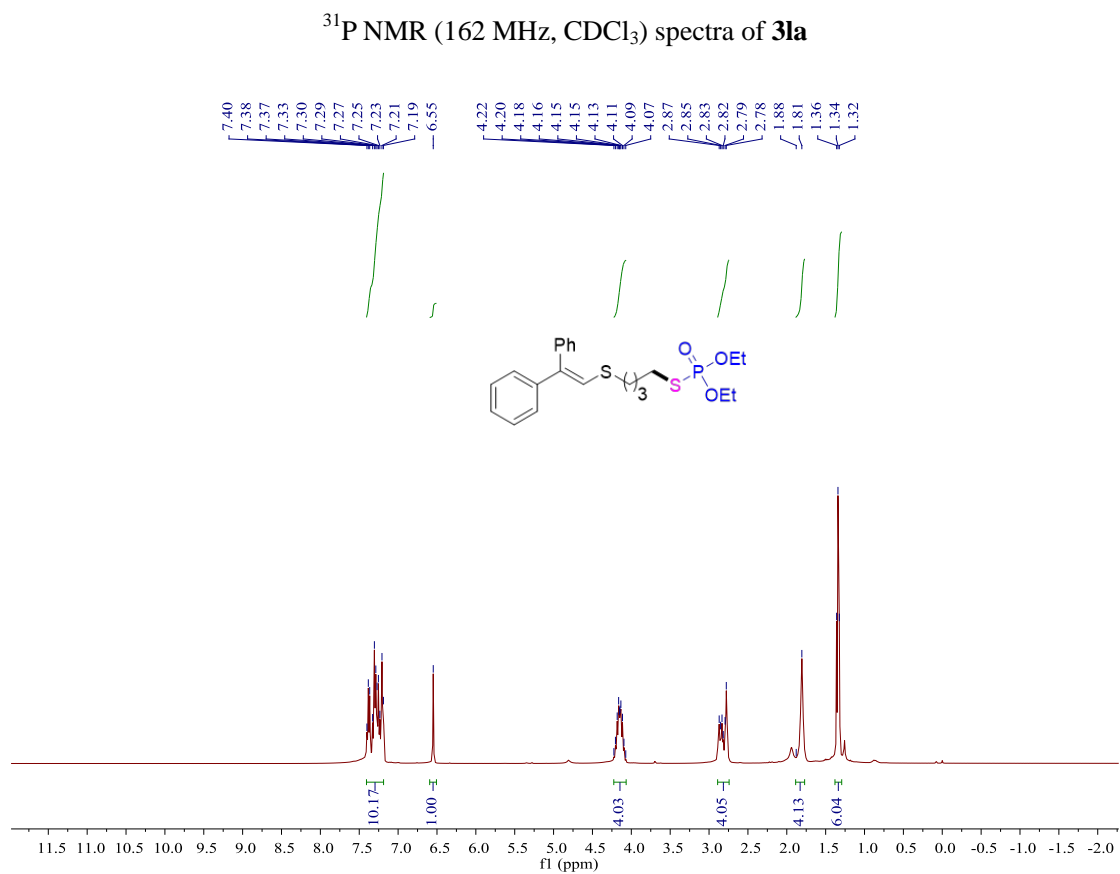

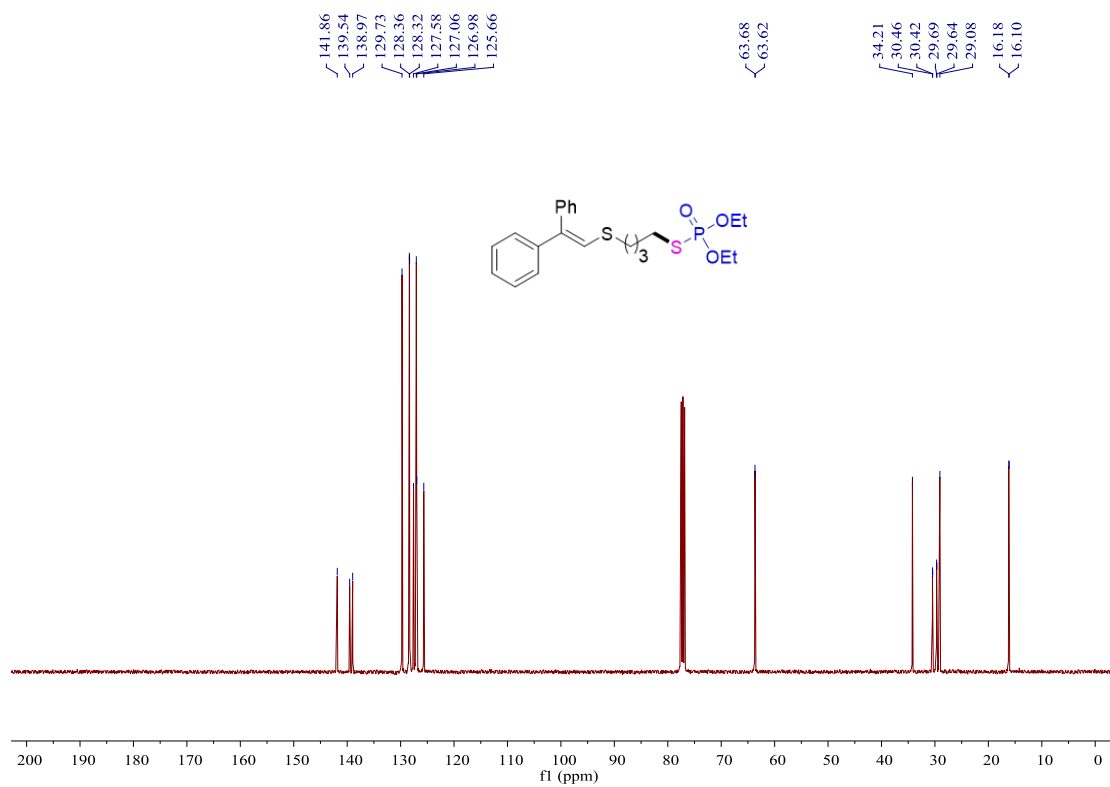

<sup>13</sup>C NMR (101 MHz, CDCl<sub>3</sub>) spectra of **3ma**

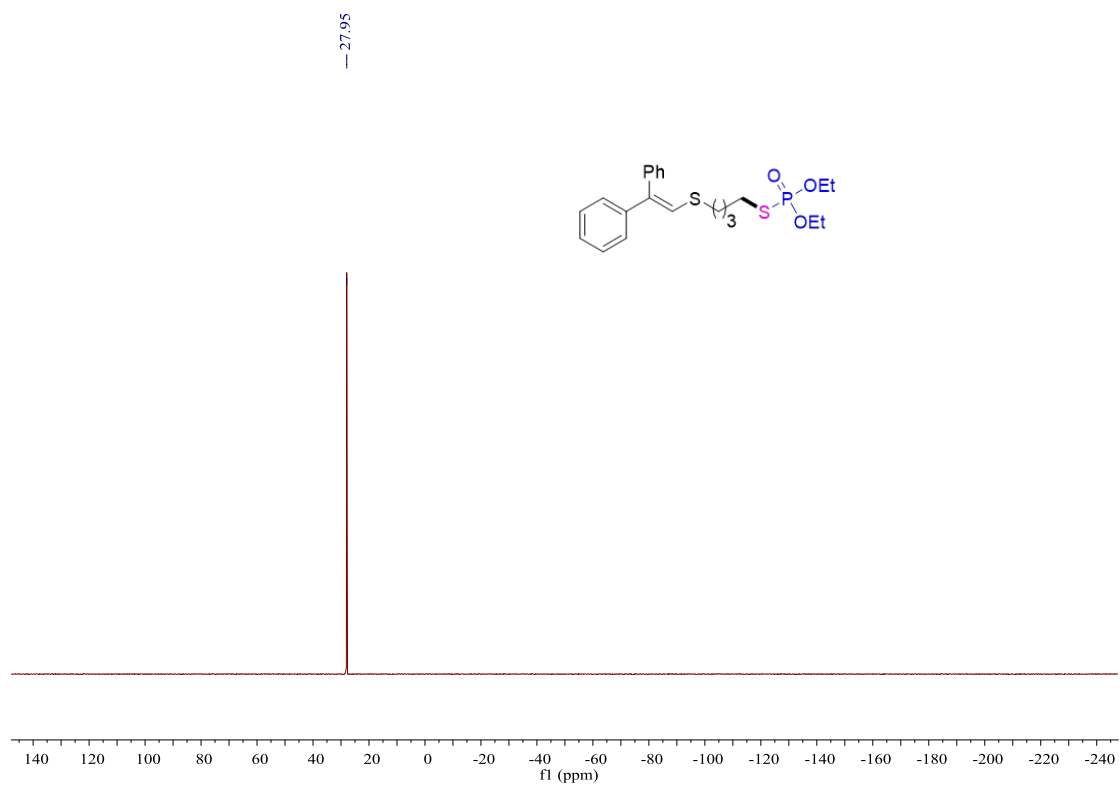

<sup>31</sup>P NMR (162 MHz, CDCl<sub>3</sub>) spectra of **3ma**

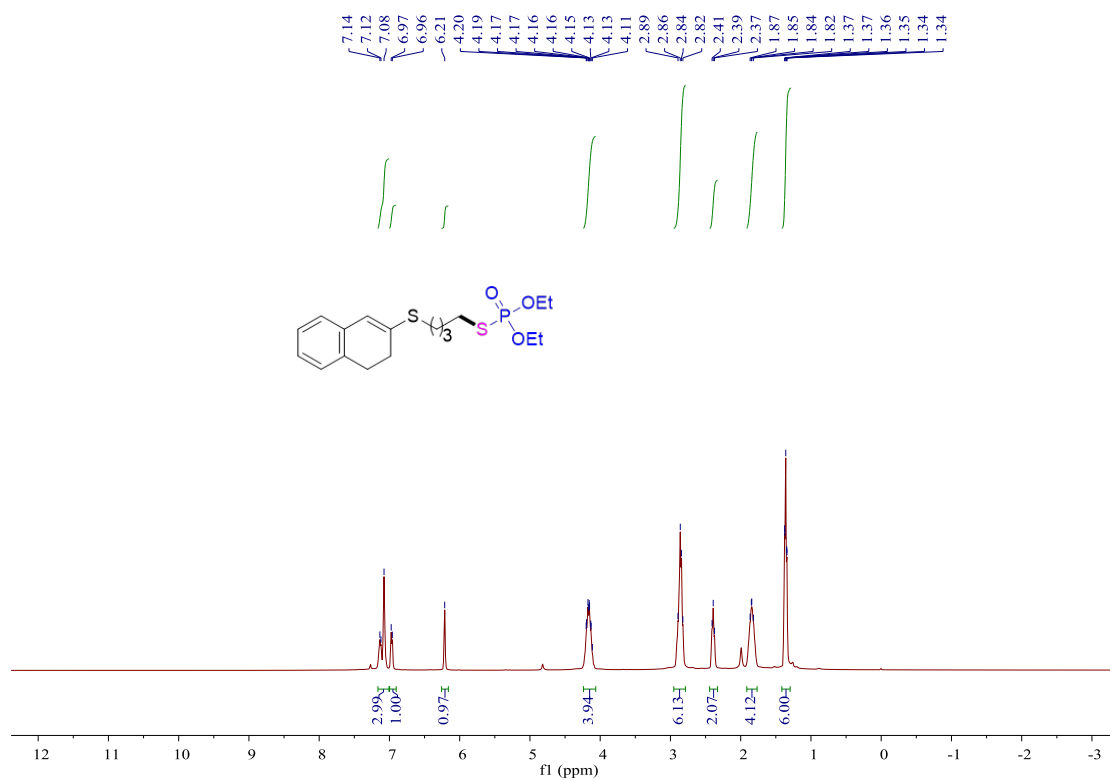

<sup>1</sup>H NMR (400 MHz, CDCl<sub>3</sub>) spectra of **3na**

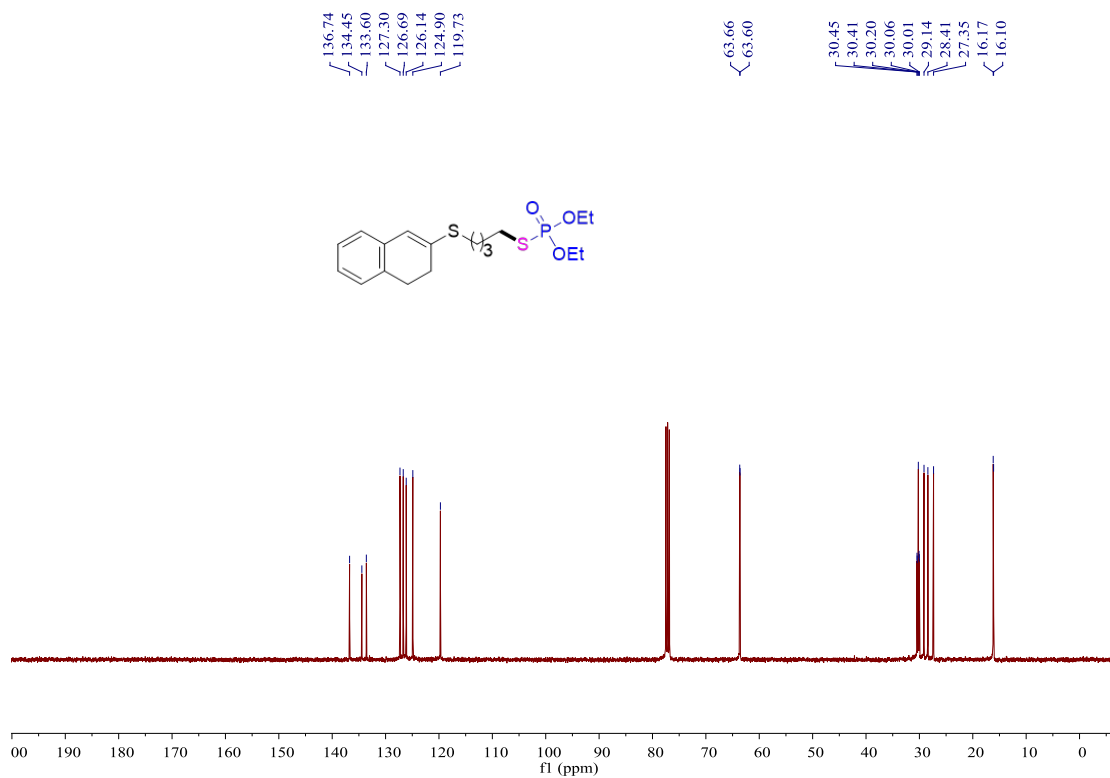

<sup>13</sup>C NMR (101 MHz, CDCl<sub>3</sub>) spectra of **3na**

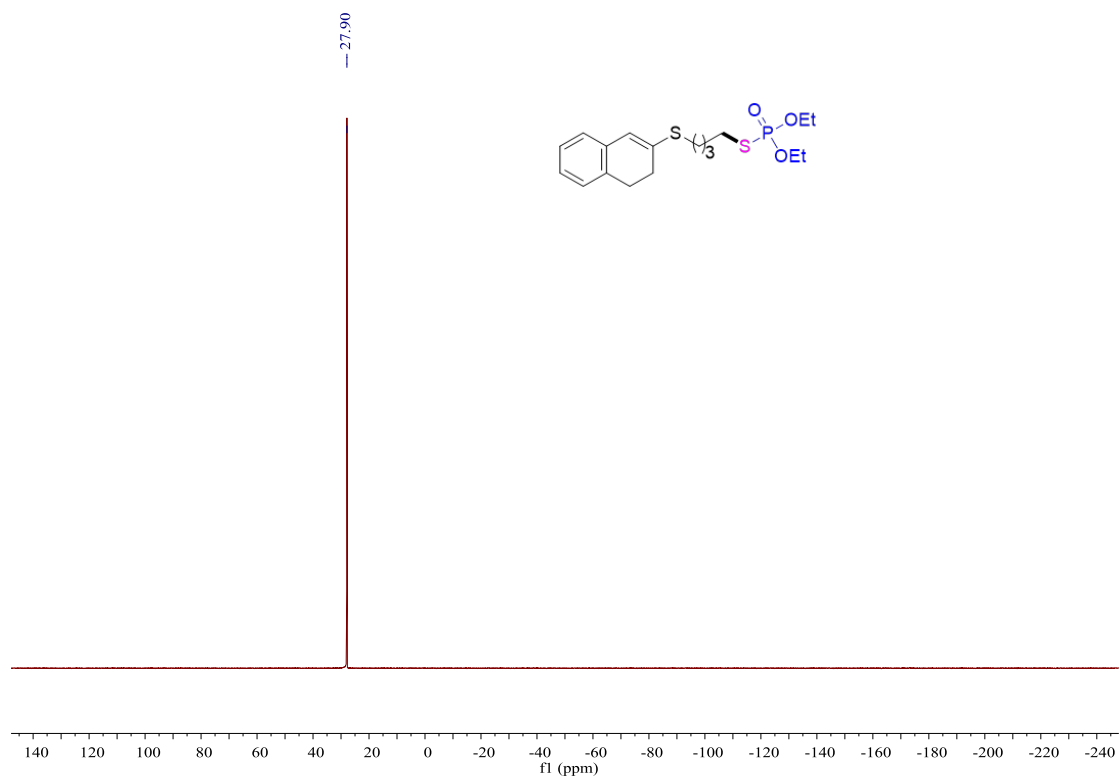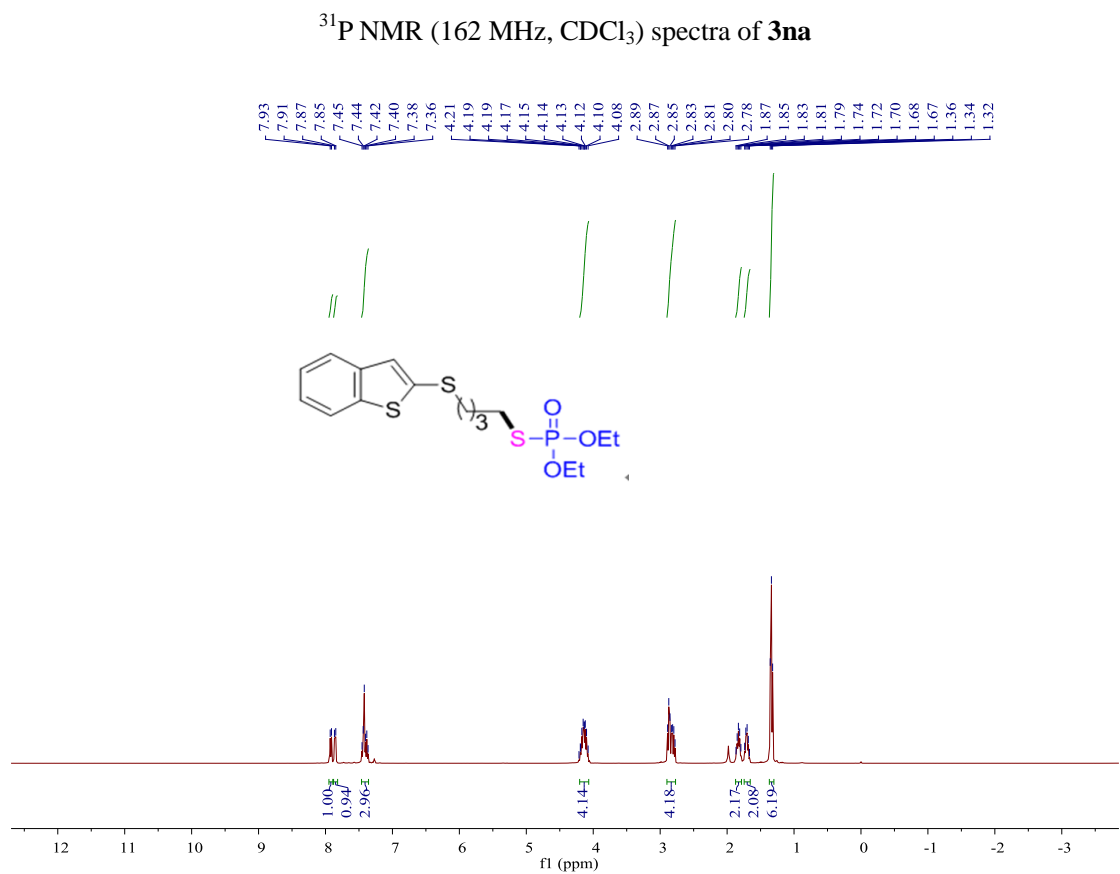

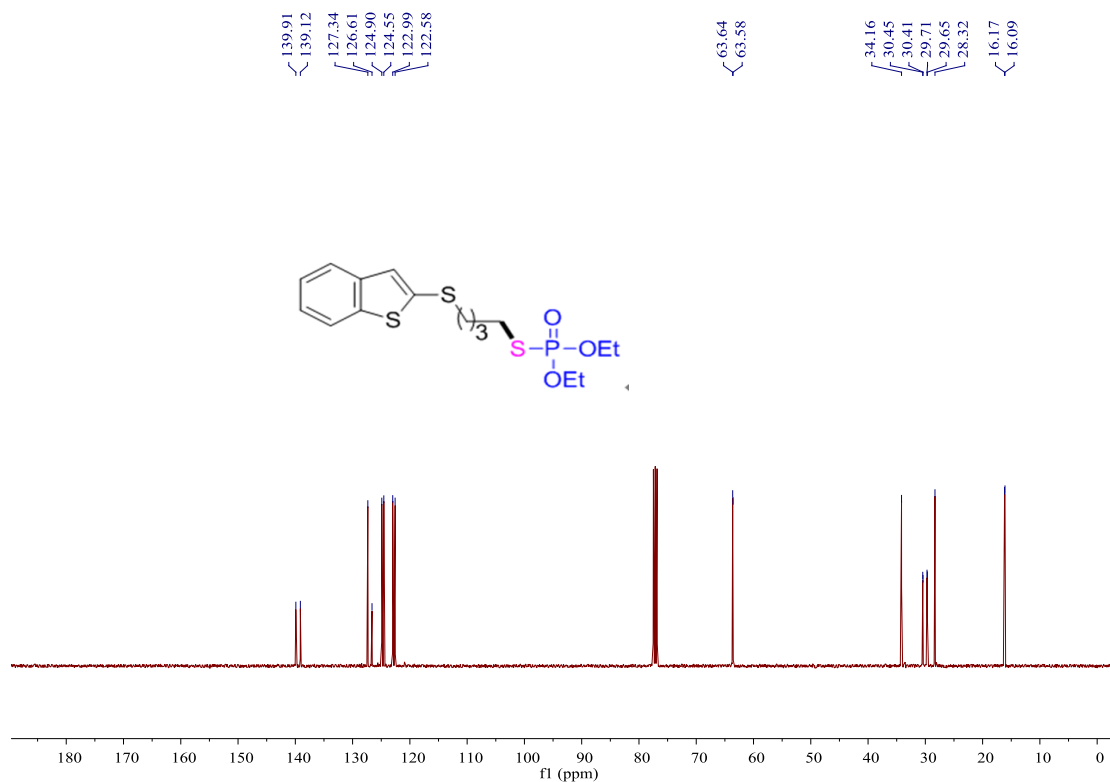

<sup>13</sup>C NMR (101 MHz, CDCl<sub>3</sub>) spectra of **30a**

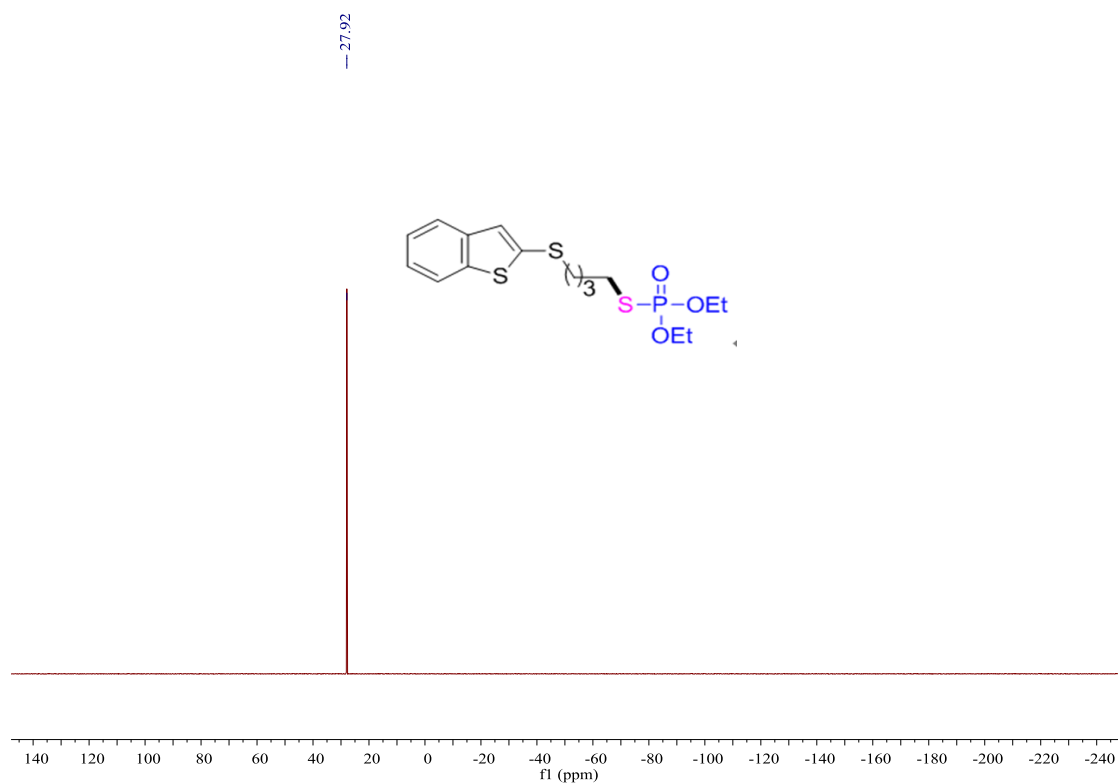

<sup>31</sup>P NMR (162 MHz, CDCl<sub>3</sub>) spectra of **30a**

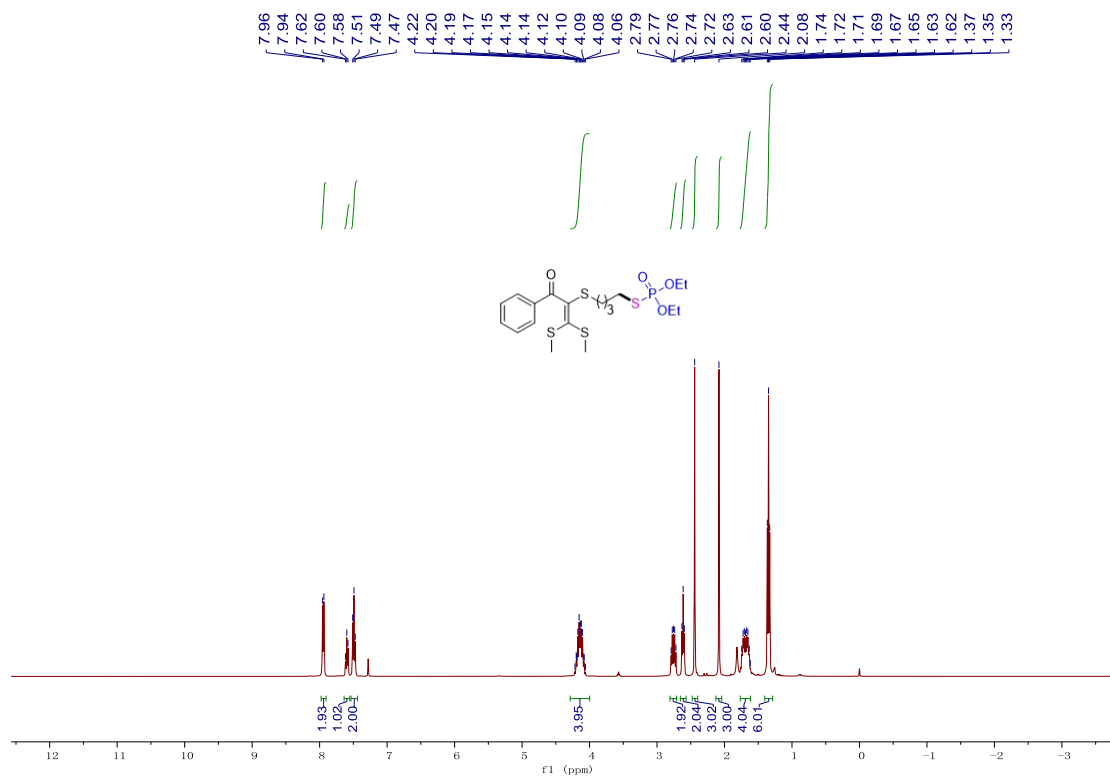

<sup>1</sup>H NMR (400 MHz, CDCl<sub>3</sub>) spectra of **3pa**

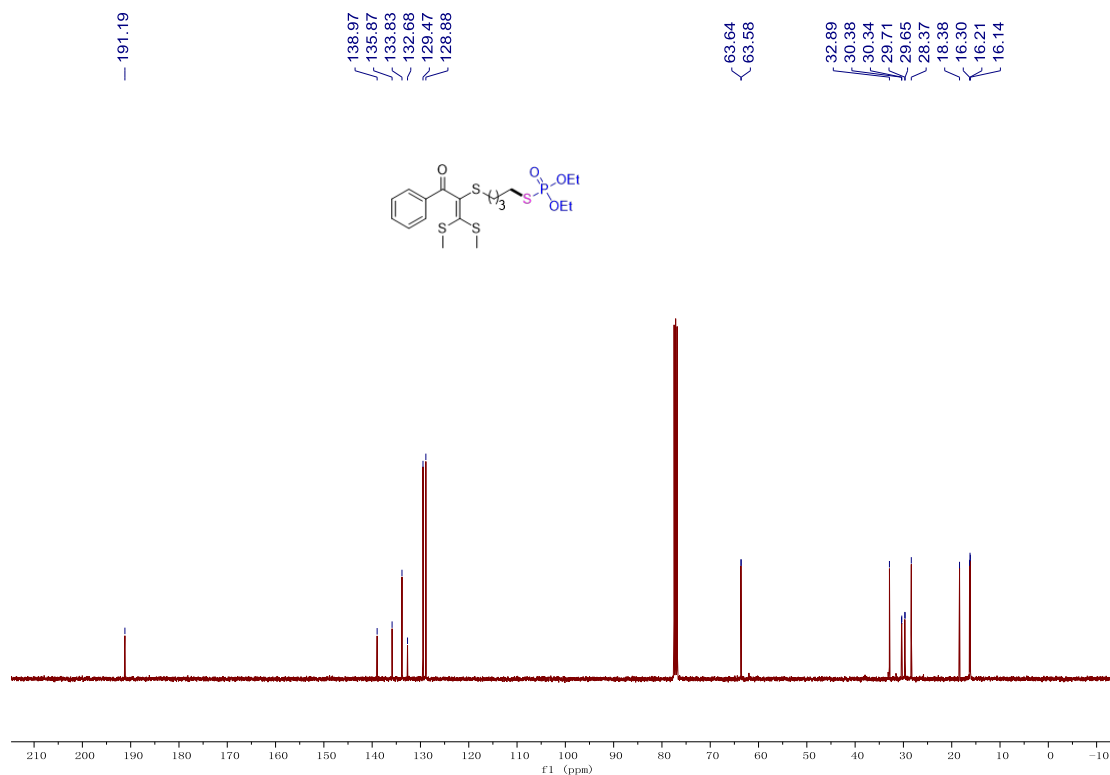

<sup>13</sup>C NMR (101 MHz, CDCl<sub>3</sub>) spectra of **3pa**

— 27.89

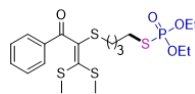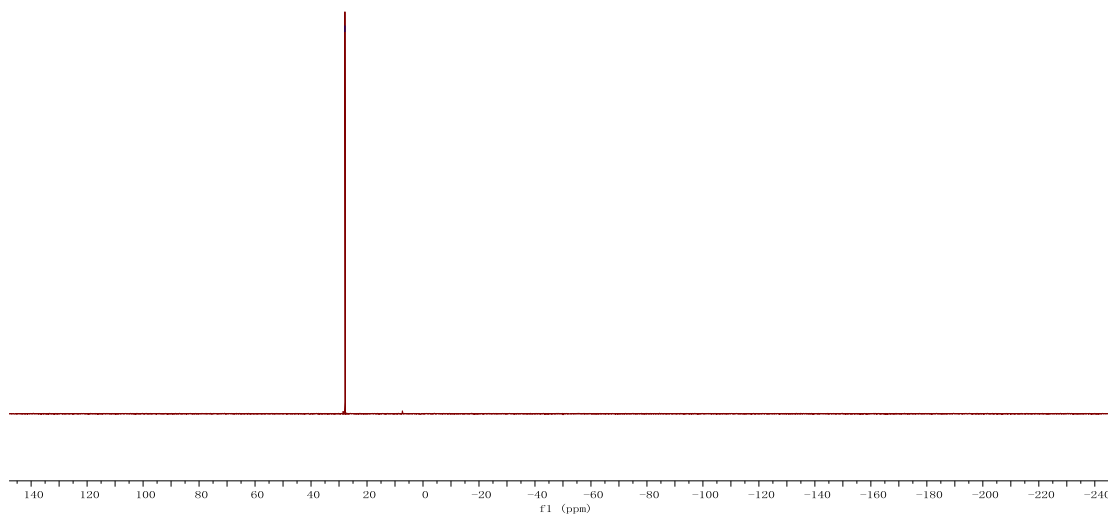

$^{31}\text{P}$  NMR (162 MHz,  $\text{CDCl}_3$ ) spectra of **3pa**

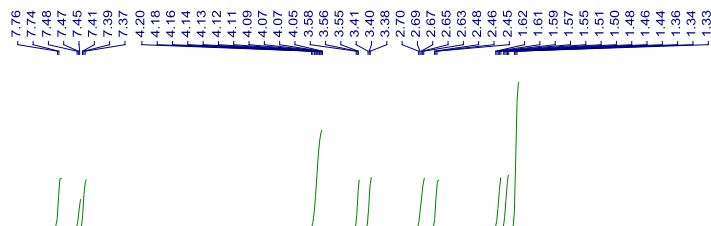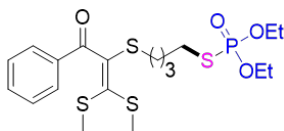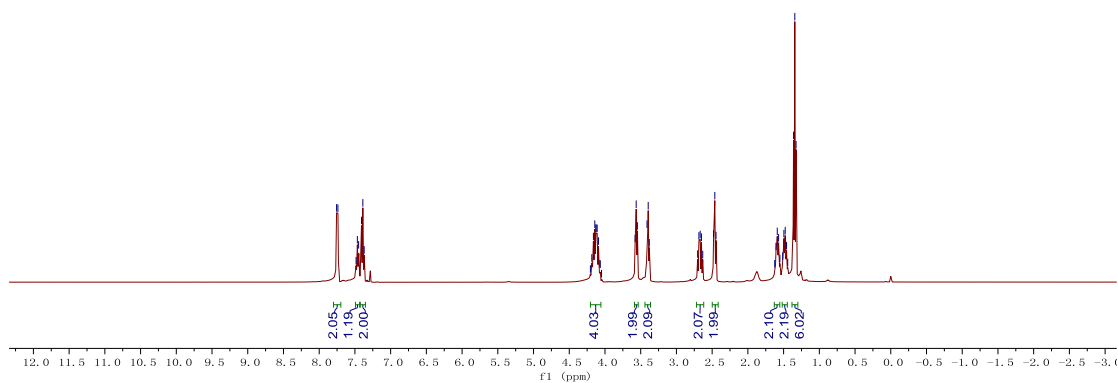

$^1\text{H}$  NMR (400 MHz,  $\text{CDCl}_3$ ) spectra of **3pa**



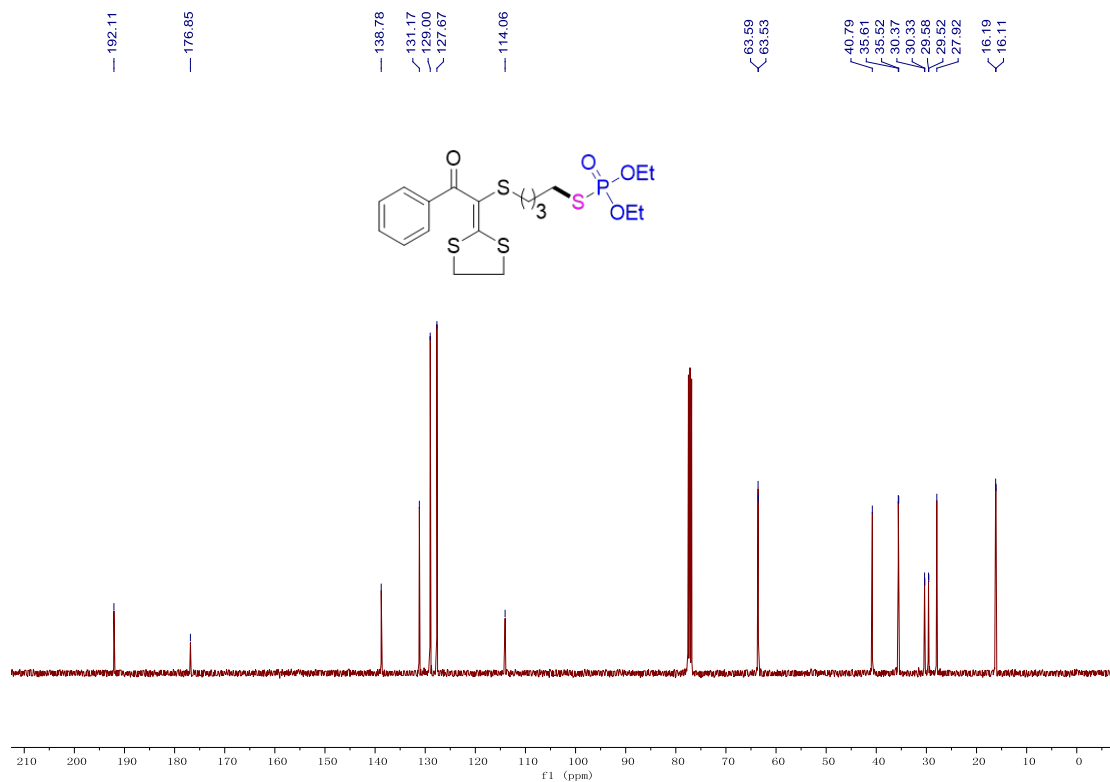

<sup>13</sup>C NMR (101 MHz, CDCl<sub>3</sub>) spectra of **3qa**

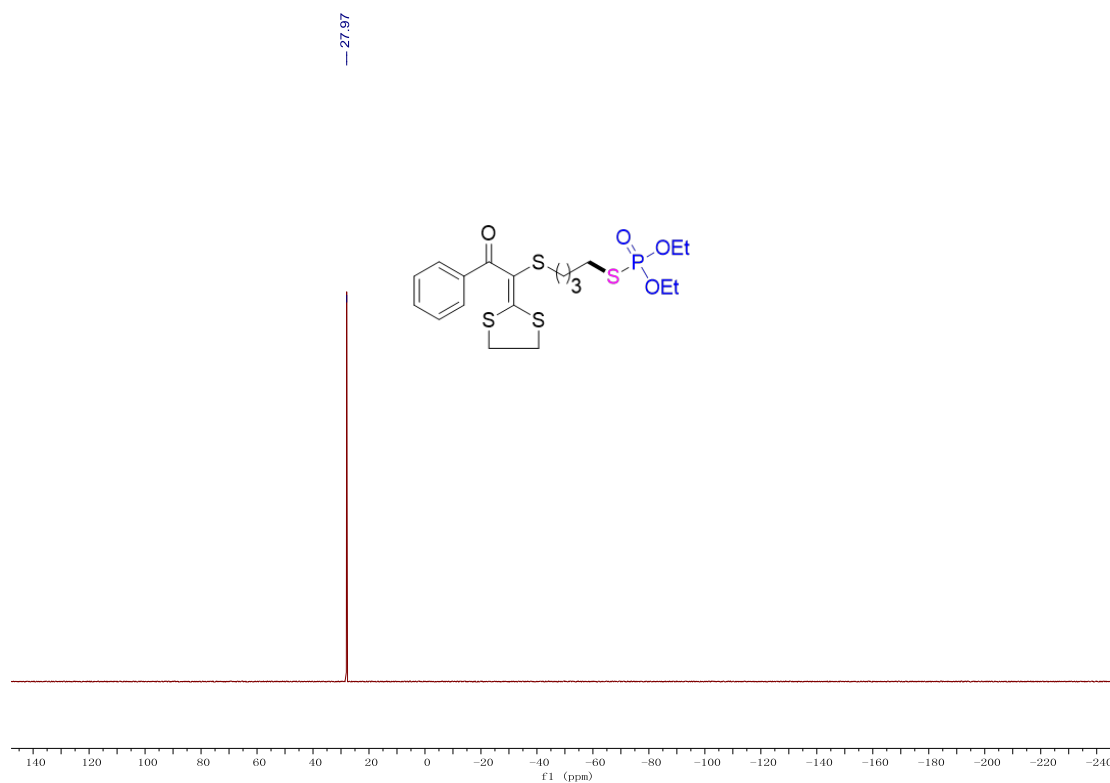

<sup>31</sup>P NMR (162 MHz, CDCl<sub>3</sub>) spectra of **3qa**

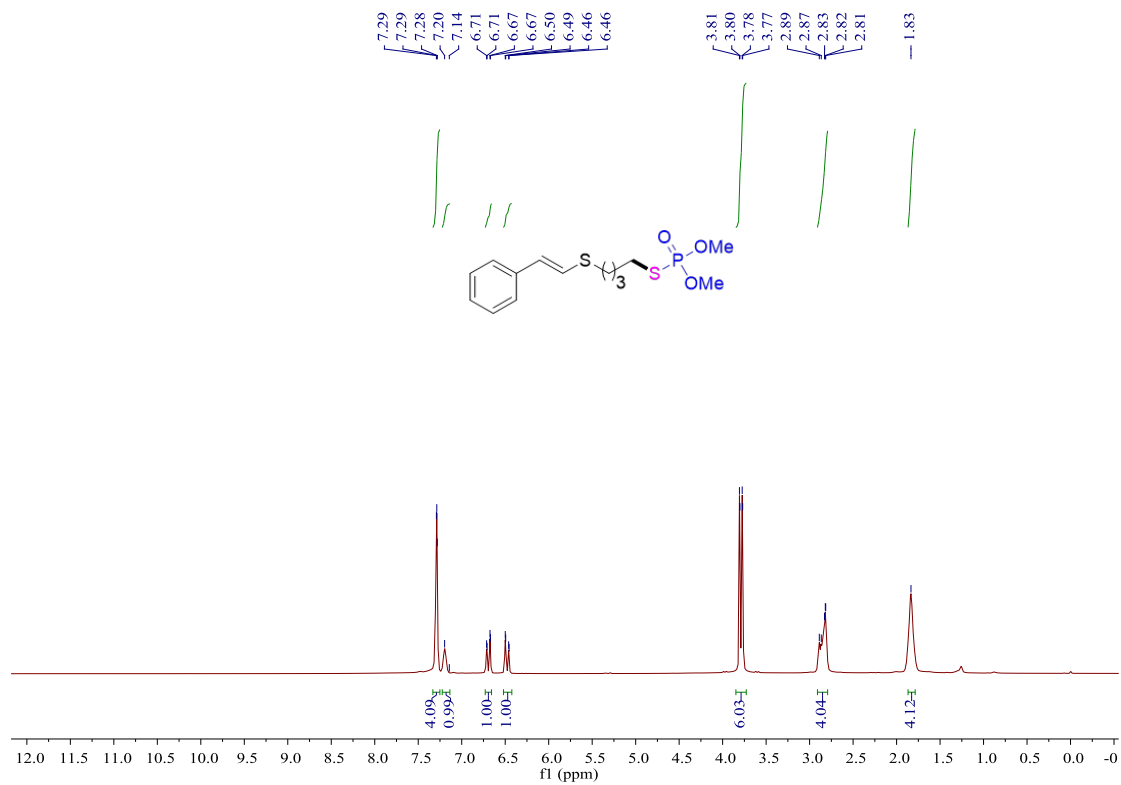

<sup>1</sup>H NMR (400 MHz, CDCl<sub>3</sub>) spectra of **3ab**

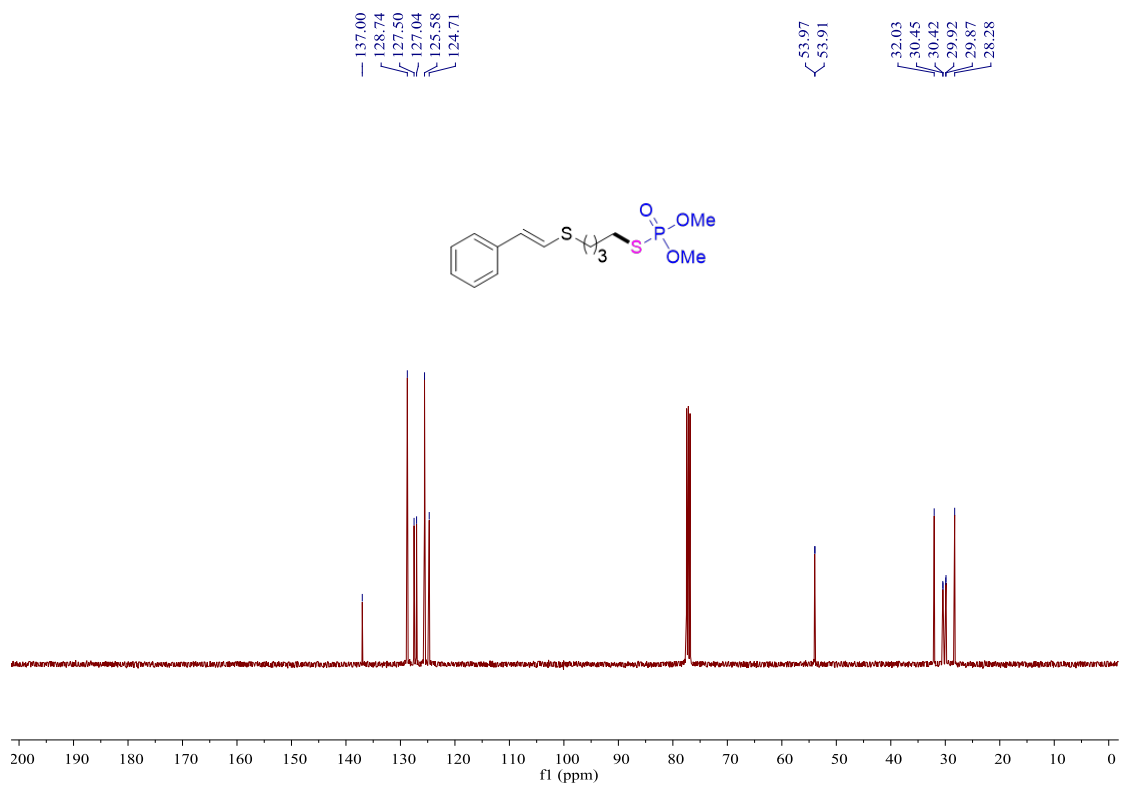

<sup>13</sup>C NMR (101 MHz, CDCl<sub>3</sub>) spectra of **3ab**

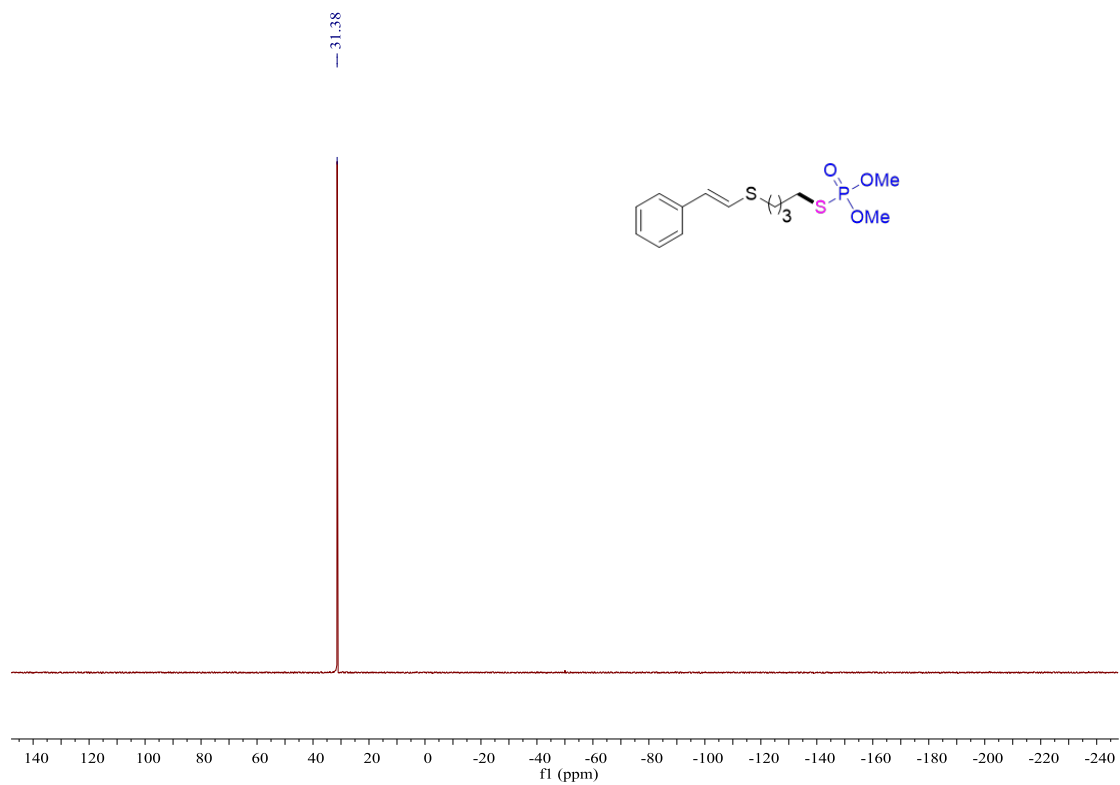

<sup>31</sup>P NMR (162 MHz, CDCl<sub>3</sub>) spectra of **3ab**

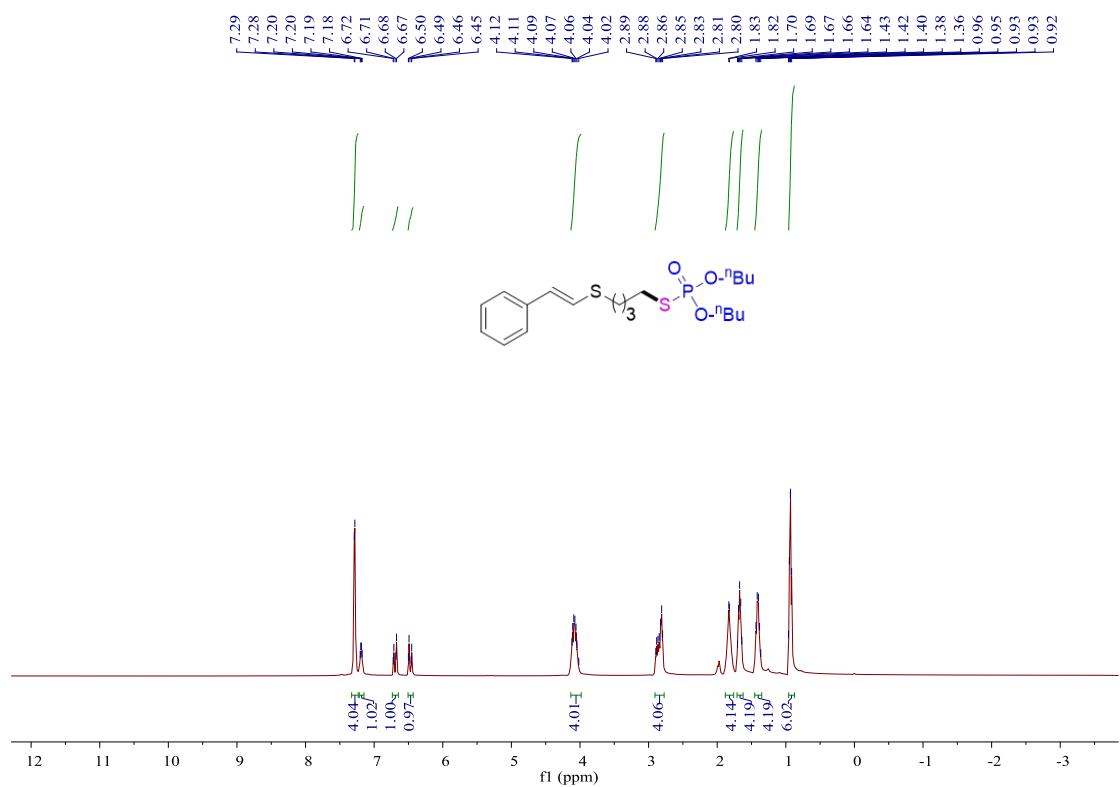

<sup>1</sup>H NMR (400 MHz, CDCl<sub>3</sub>) spectra of **3ac**

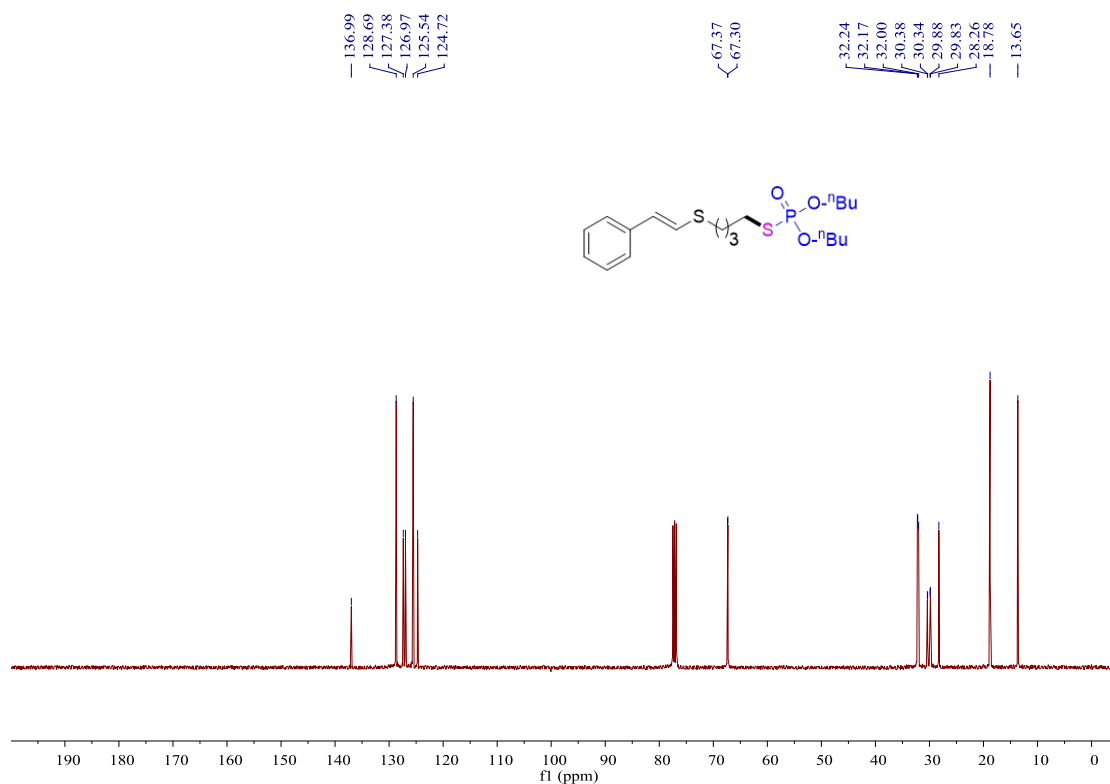

$^{13}\text{C}$  NMR (101 MHz,  $\text{CDCl}_3$ ) spectra of **3ac**

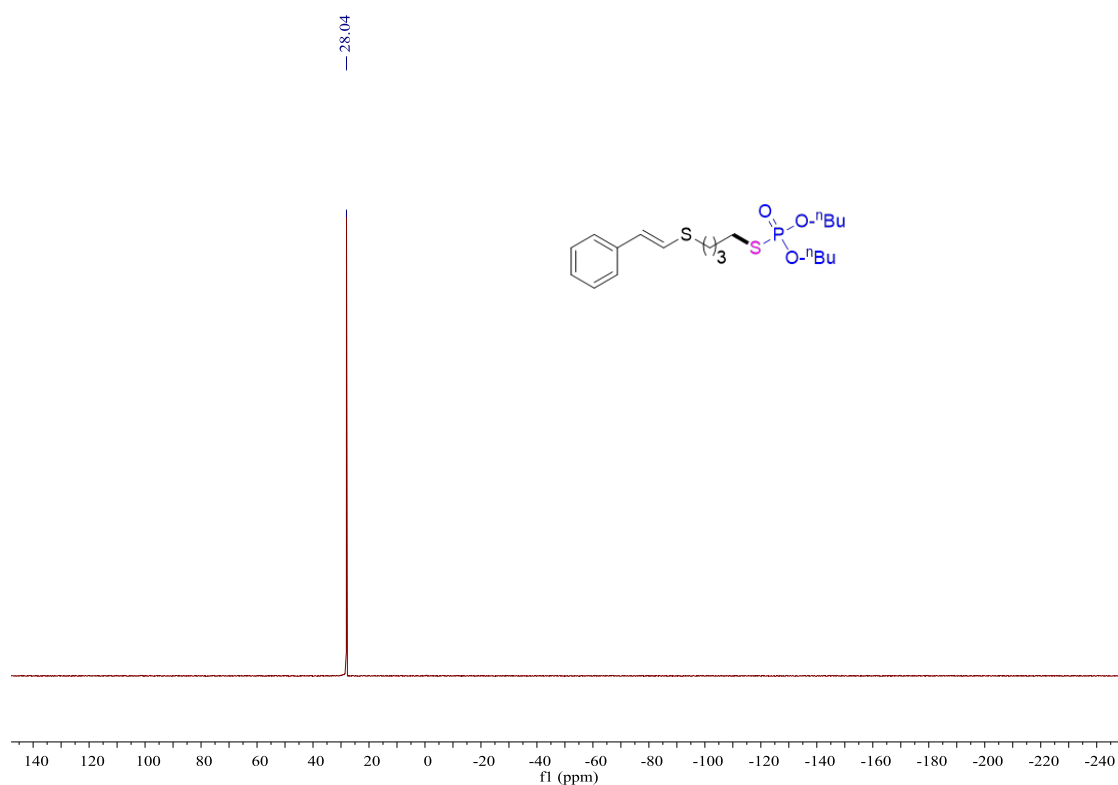

$^{31}\text{P}$  NMR (162 MHz,  $\text{CDCl}_3$ ) spectra of **3ac**

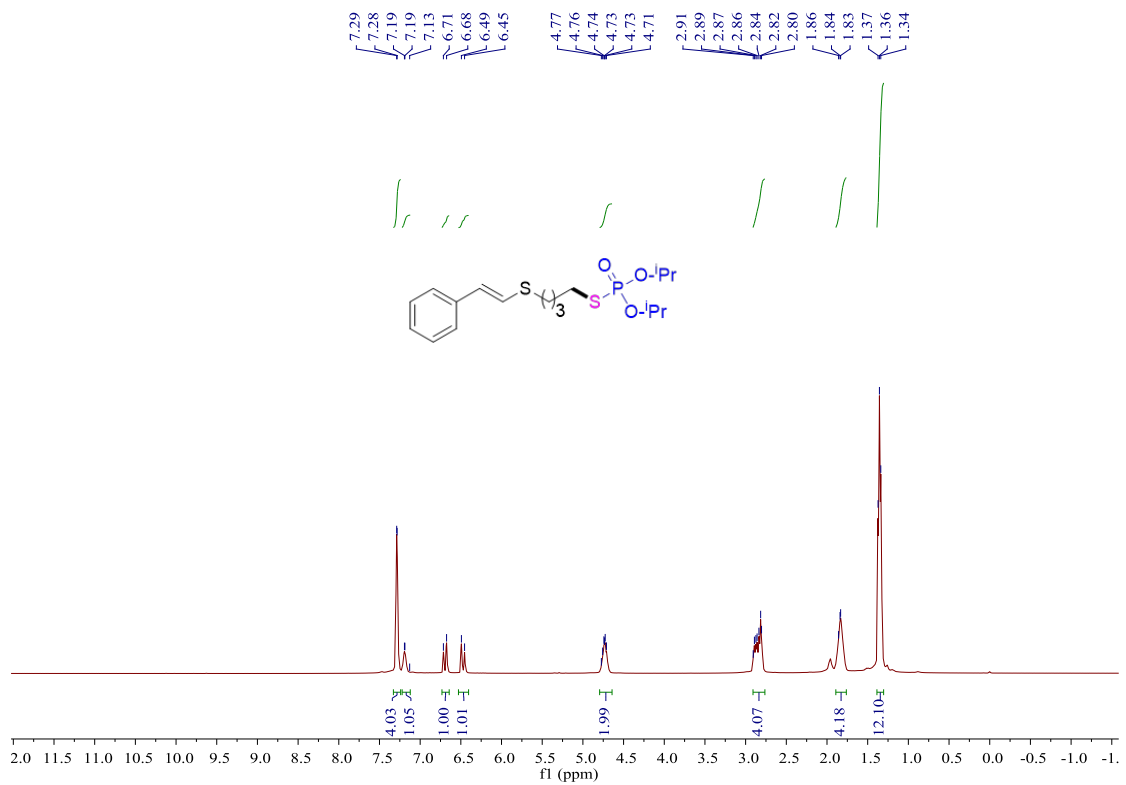

<sup>1</sup>H NMR (400 MHz, CDCl<sub>3</sub>) spectra of **3ad**

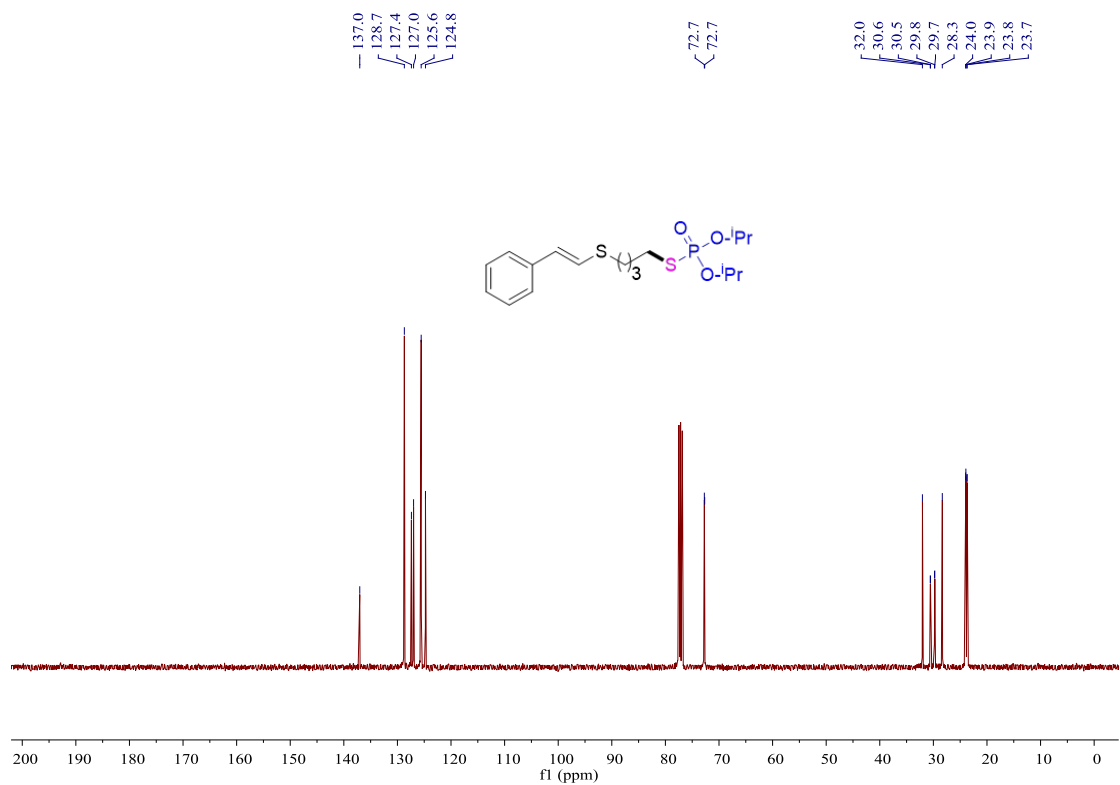

<sup>13</sup>C NMR (101 MHz, CDCl<sub>3</sub>) spectra of **3ad**

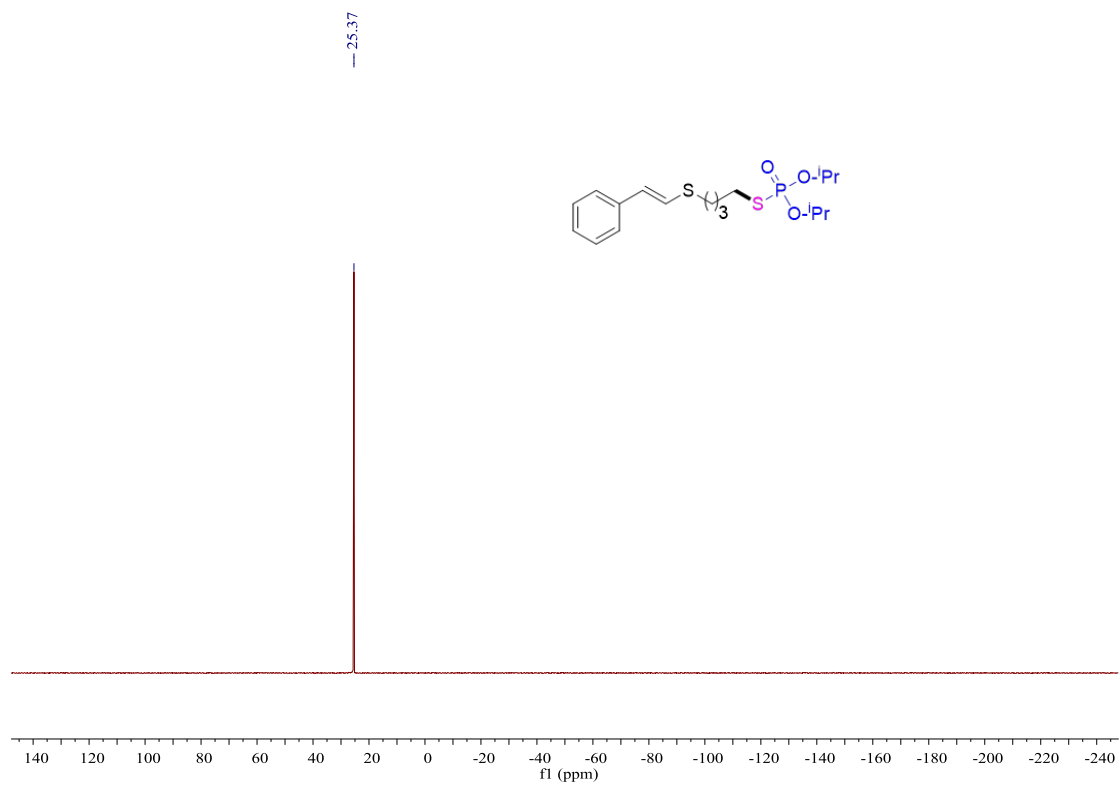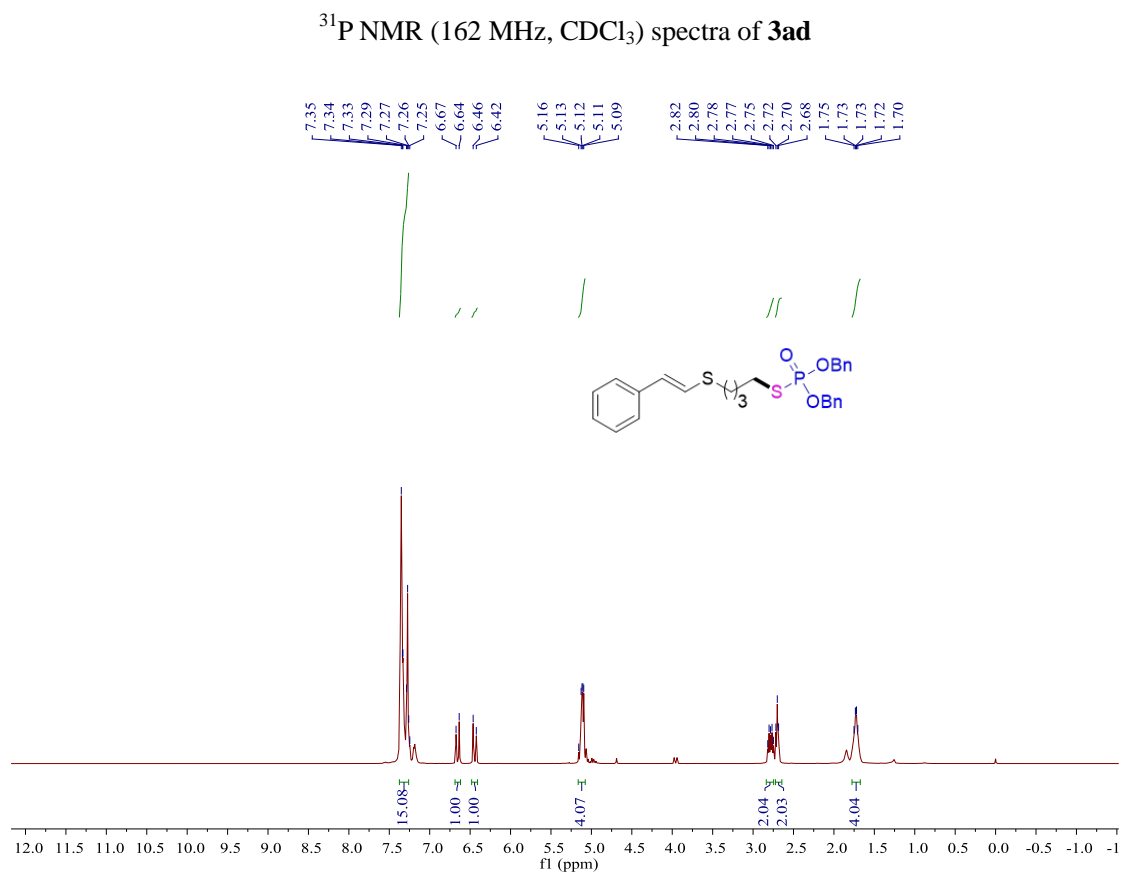

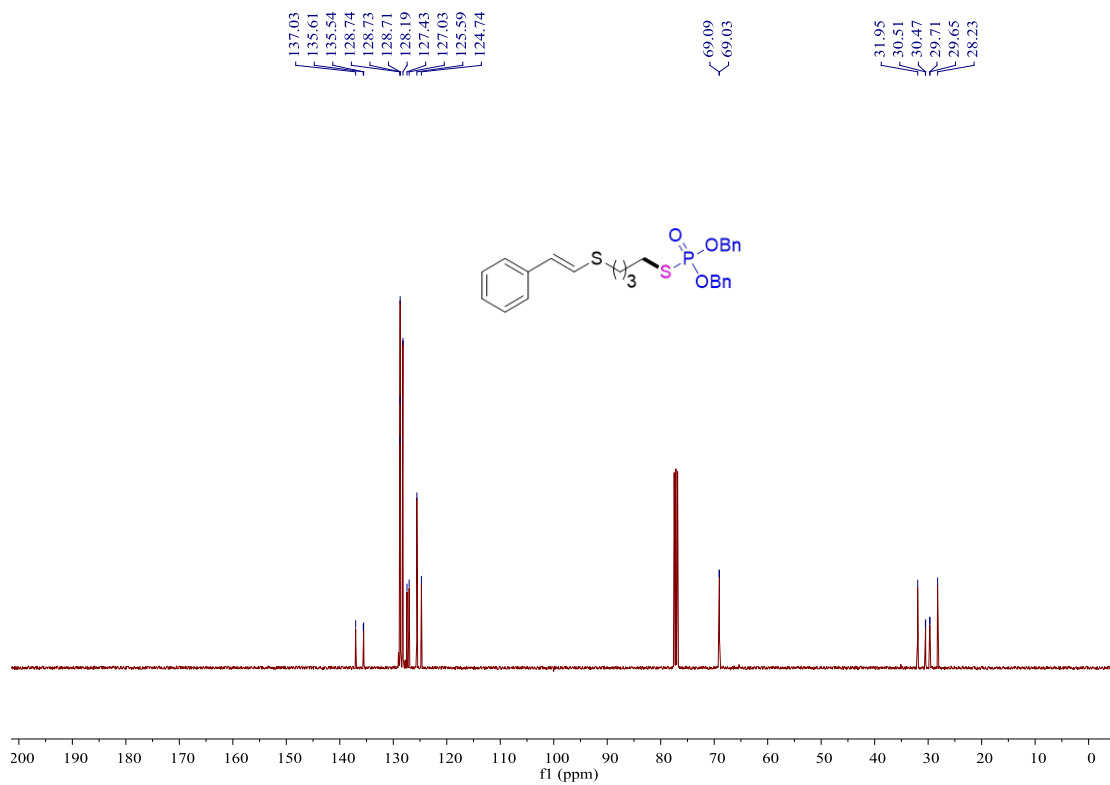

<sup>13</sup>C NMR (101 MHz, CDCl<sub>3</sub>) spectra of **3ae**

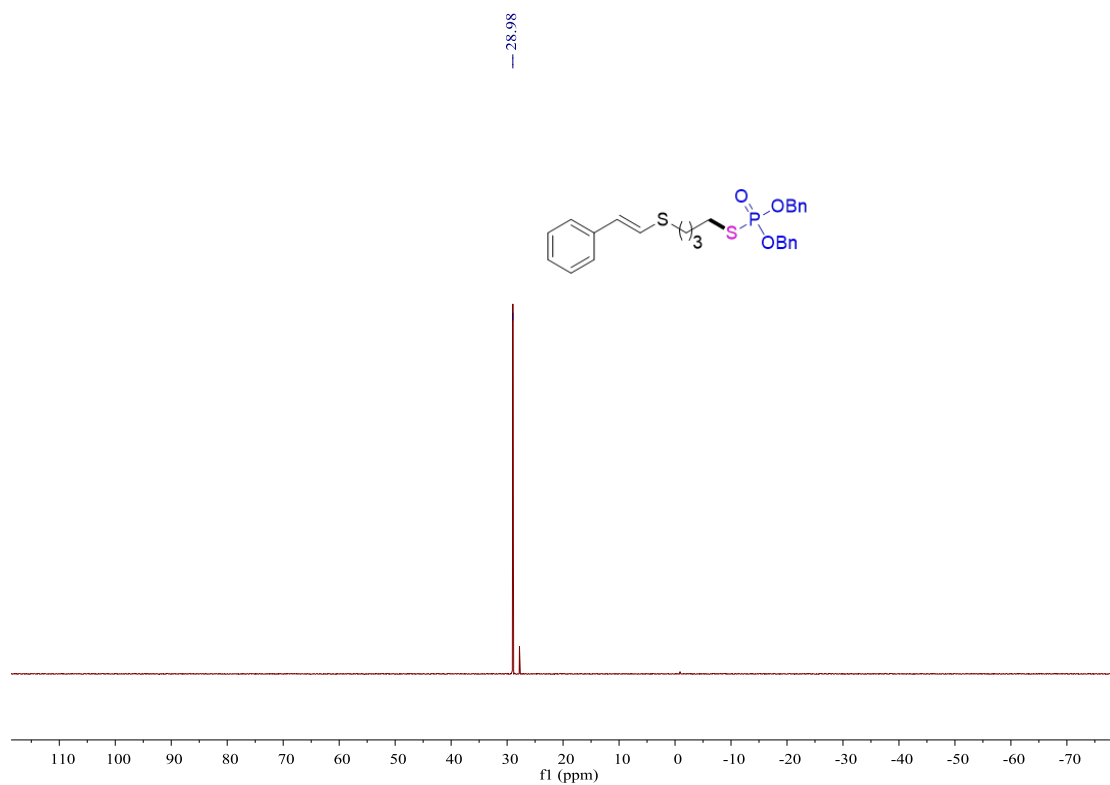

<sup>31</sup>P NMR (162 MHz, CDCl<sub>3</sub>) spectra of **3ae**

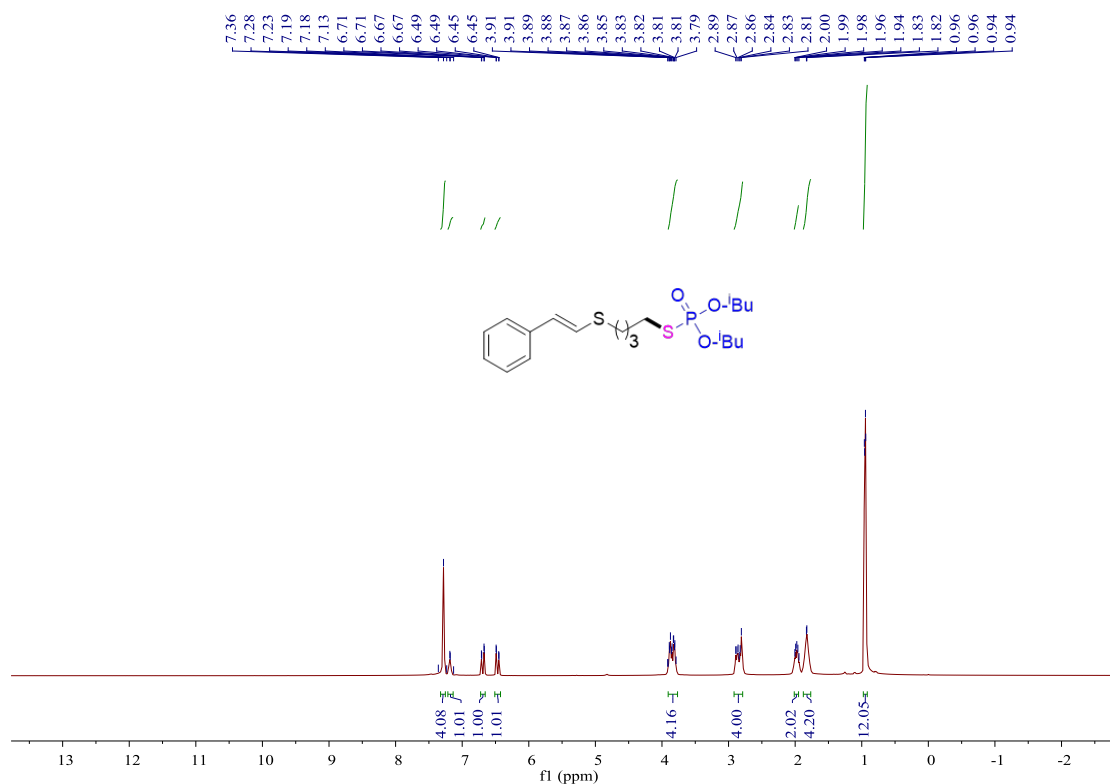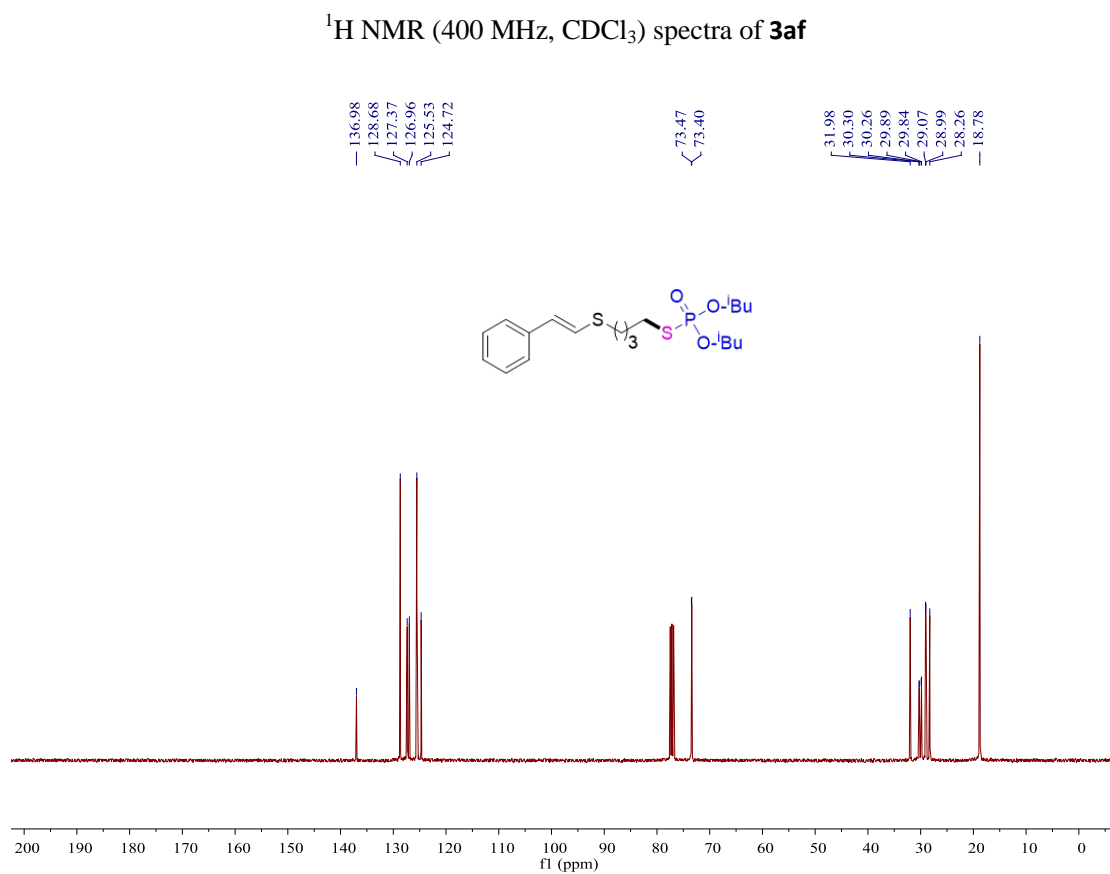



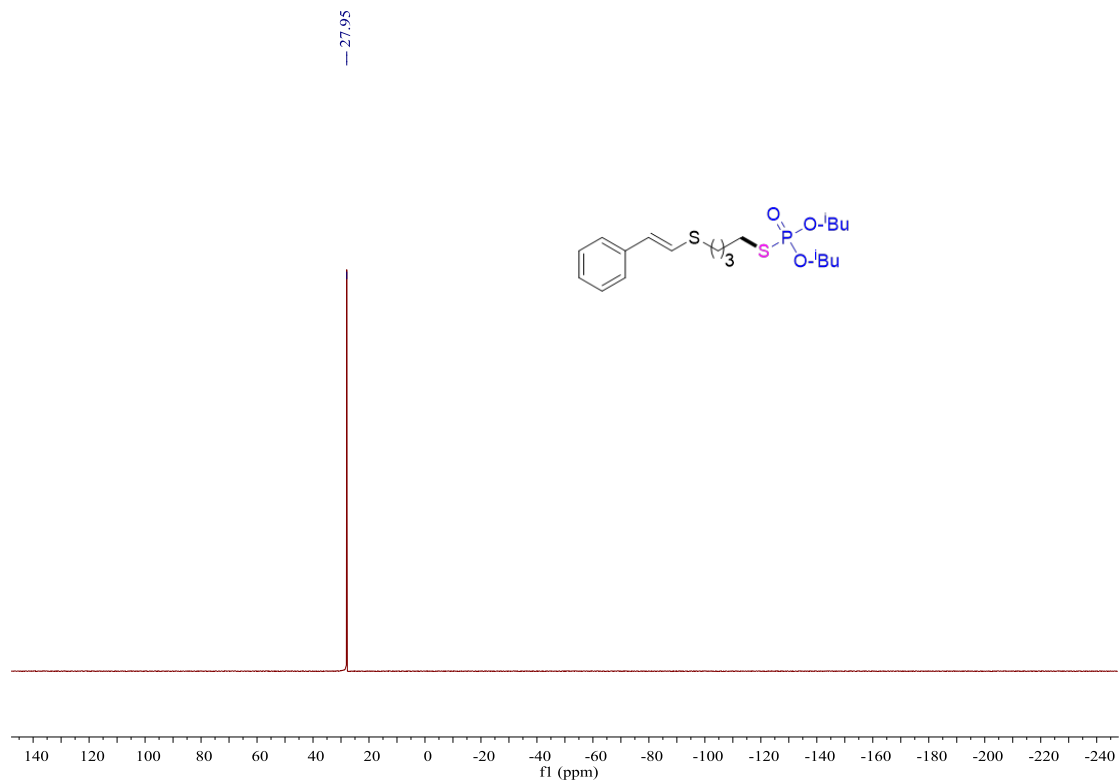

$^{31}\text{P}$  NMR (162 MHz,  $\text{CDCl}_3$ ) spectra of **3af**

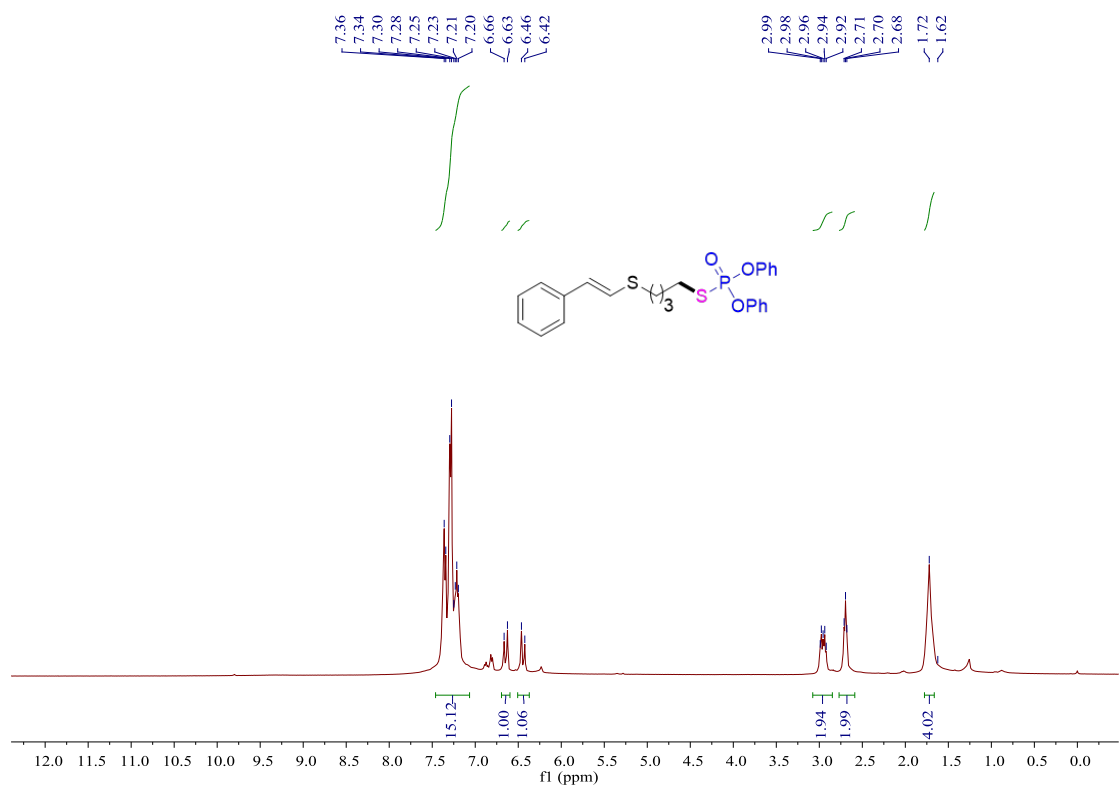

$^1\text{H}$  NMR (400 MHz,  $\text{CDCl}_3$ ) spectra of **3ag**

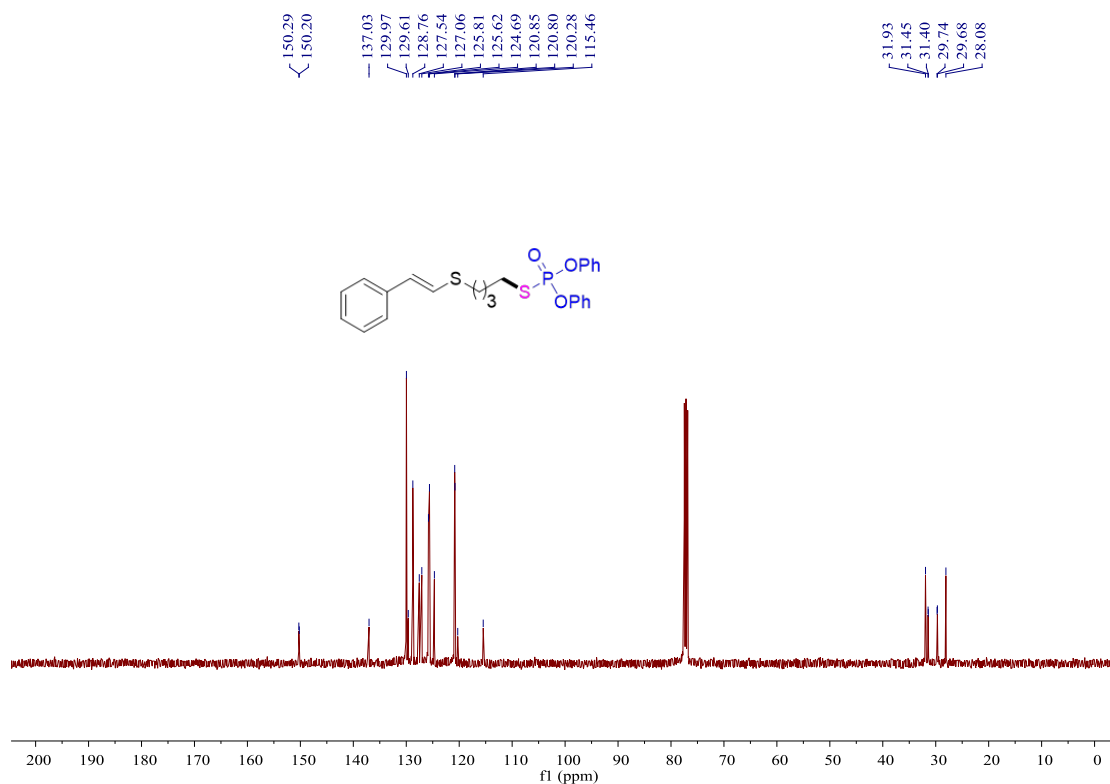

$^{13}\text{C}$  NMR (101 MHz,  $\text{CDCl}_3$ ) spectra of **3ag**

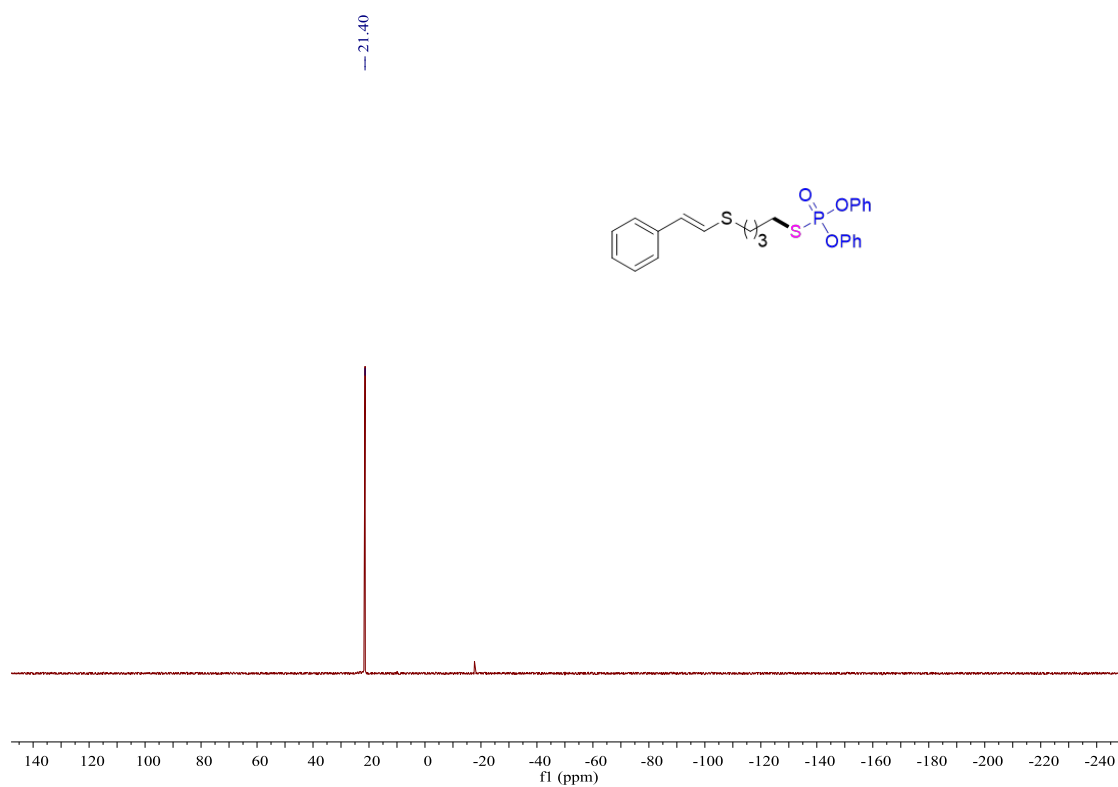

$^{31}\text{P}$  NMR (162 MHz,  $\text{CDCl}_3$ ) spectra of **3ag**

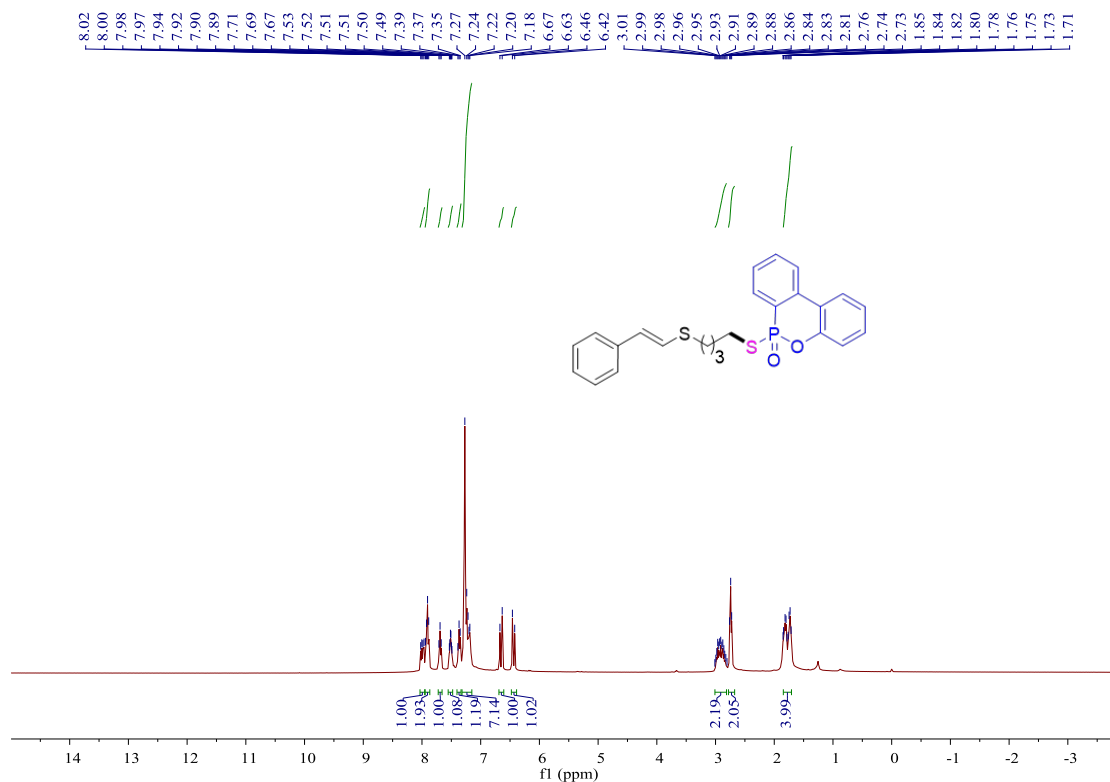

<sup>1</sup>H NMR (400 MHz, CDCl<sub>3</sub>) spectra of **3ah**

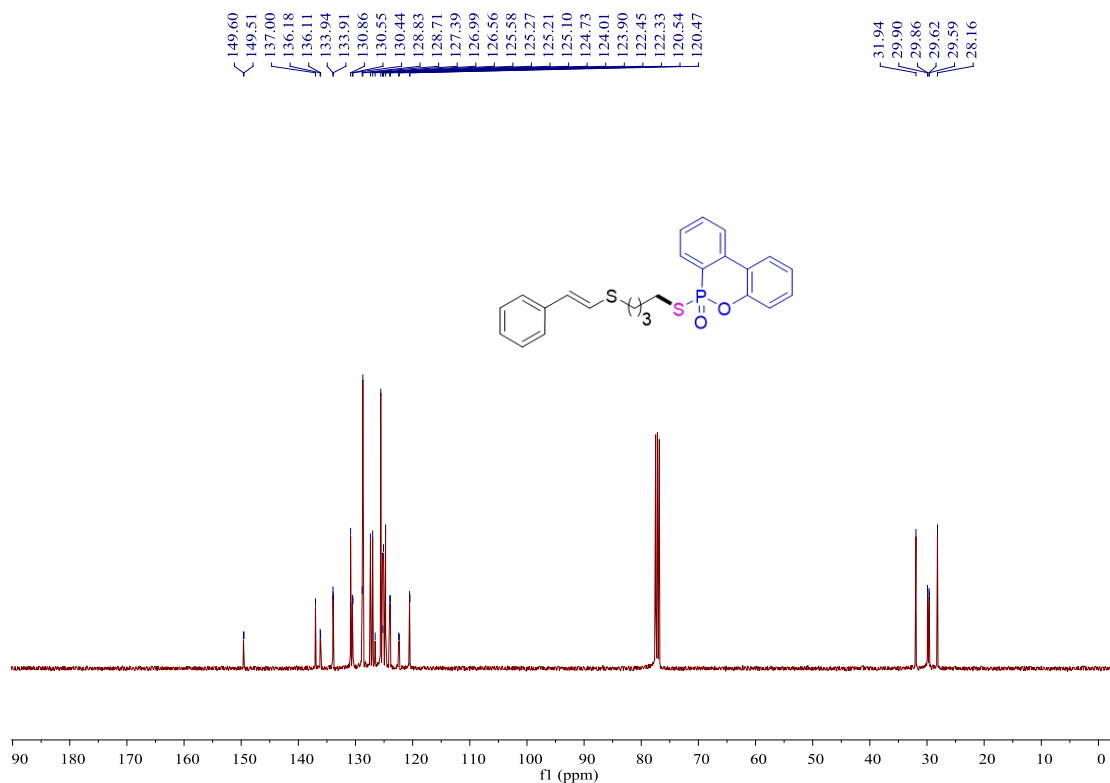

<sup>13</sup>C NMR (101 MHz, CDCl<sub>3</sub>) spectra of **3ah**

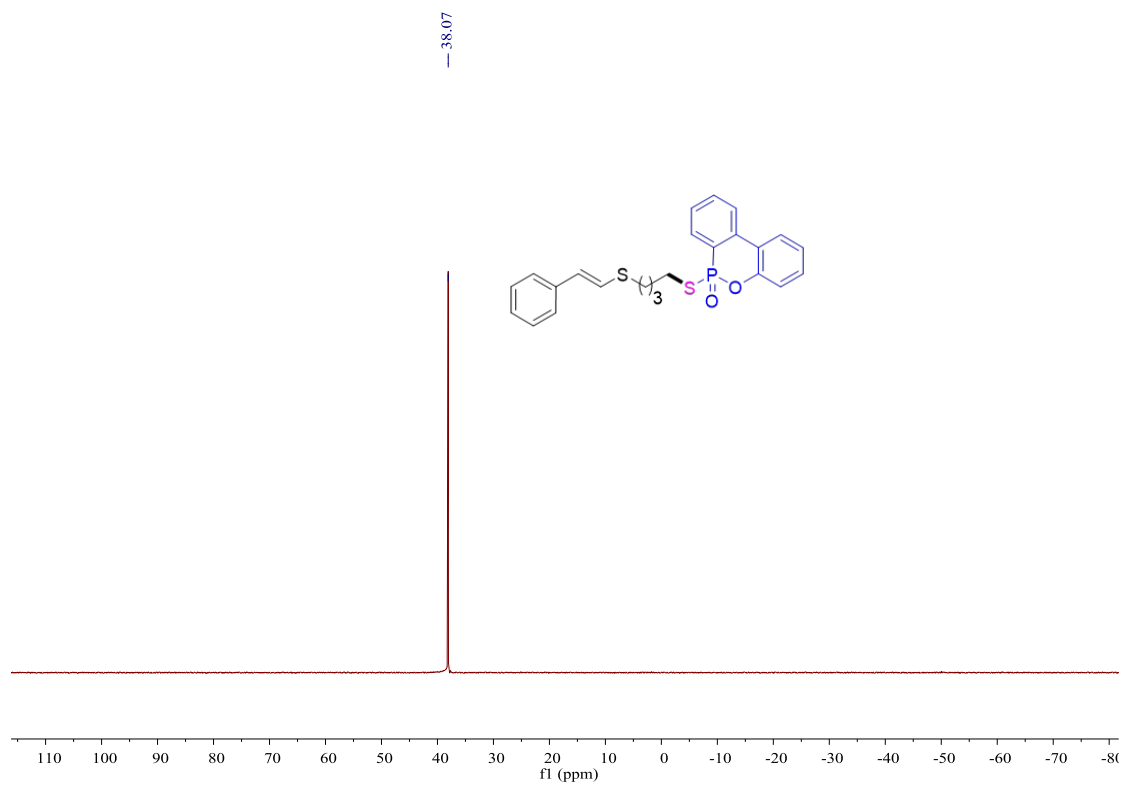

$^{31}\text{P}$  NMR (162 MHz,  $\text{CDCl}_3$ ) spectra of **3ah**

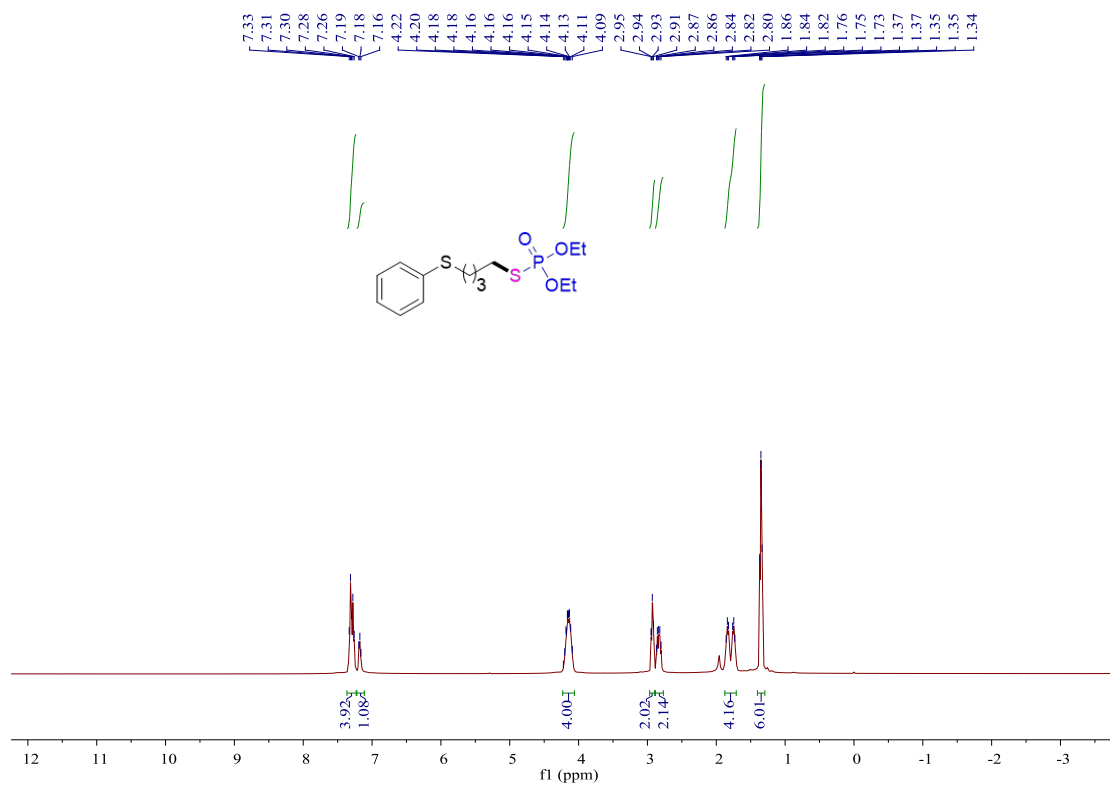

$^1\text{H}$  NMR (400 MHz,  $\text{CDCl}_3$ ) spectra of **5aa**

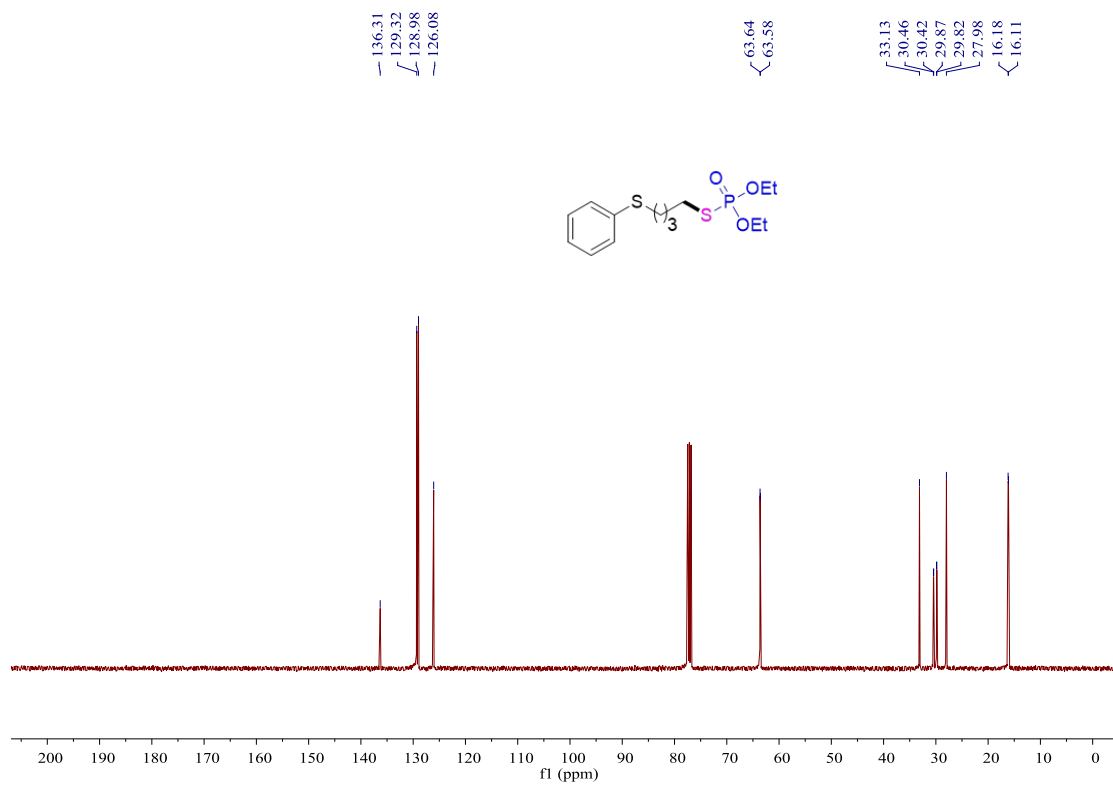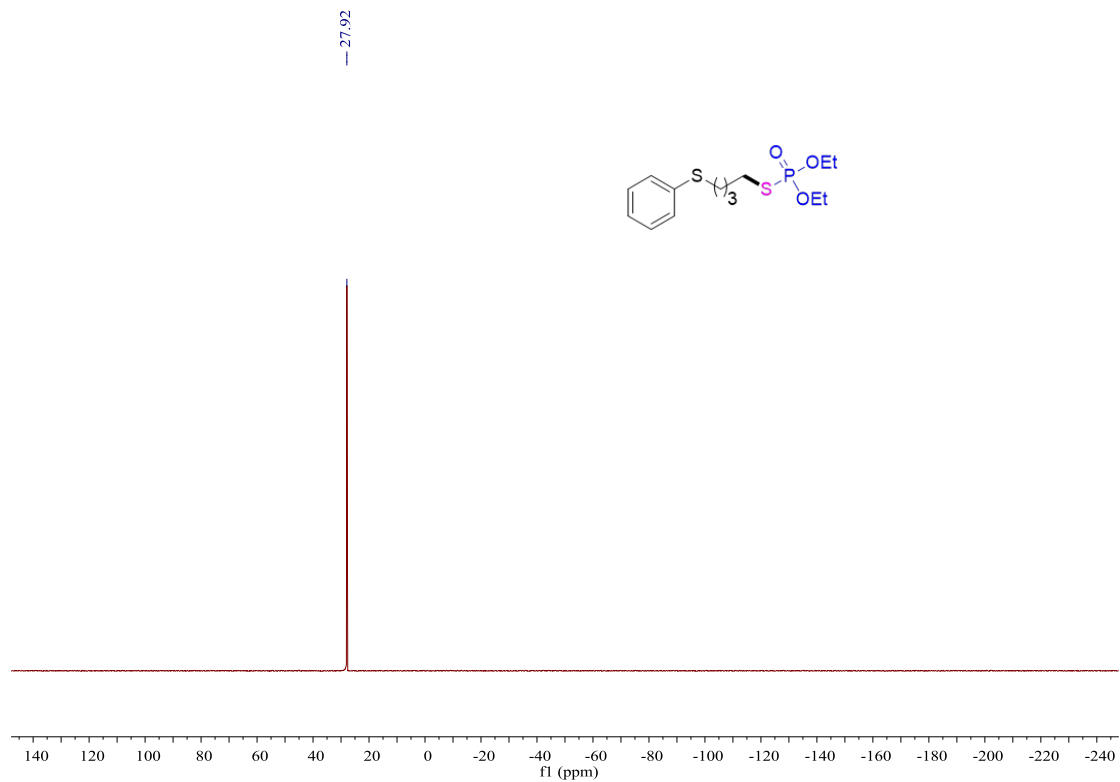

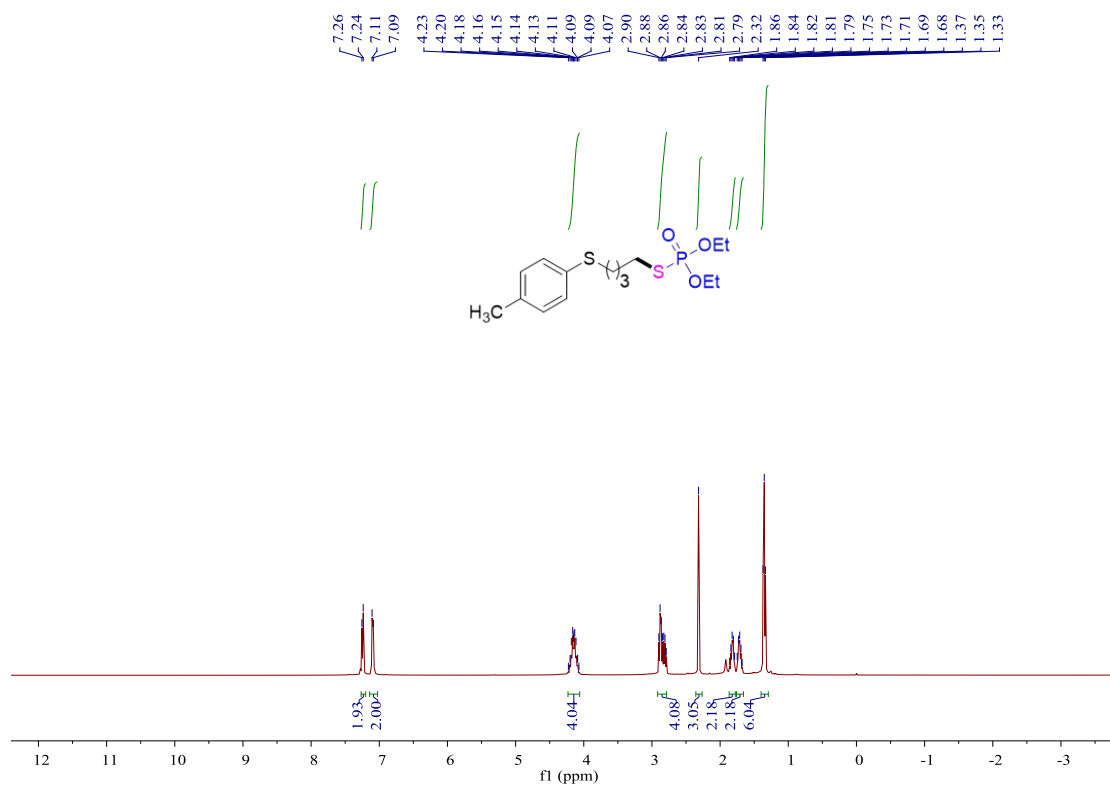

<sup>1</sup>H NMR (400 MHz, CDCl<sub>3</sub>) spectra of **5ba**

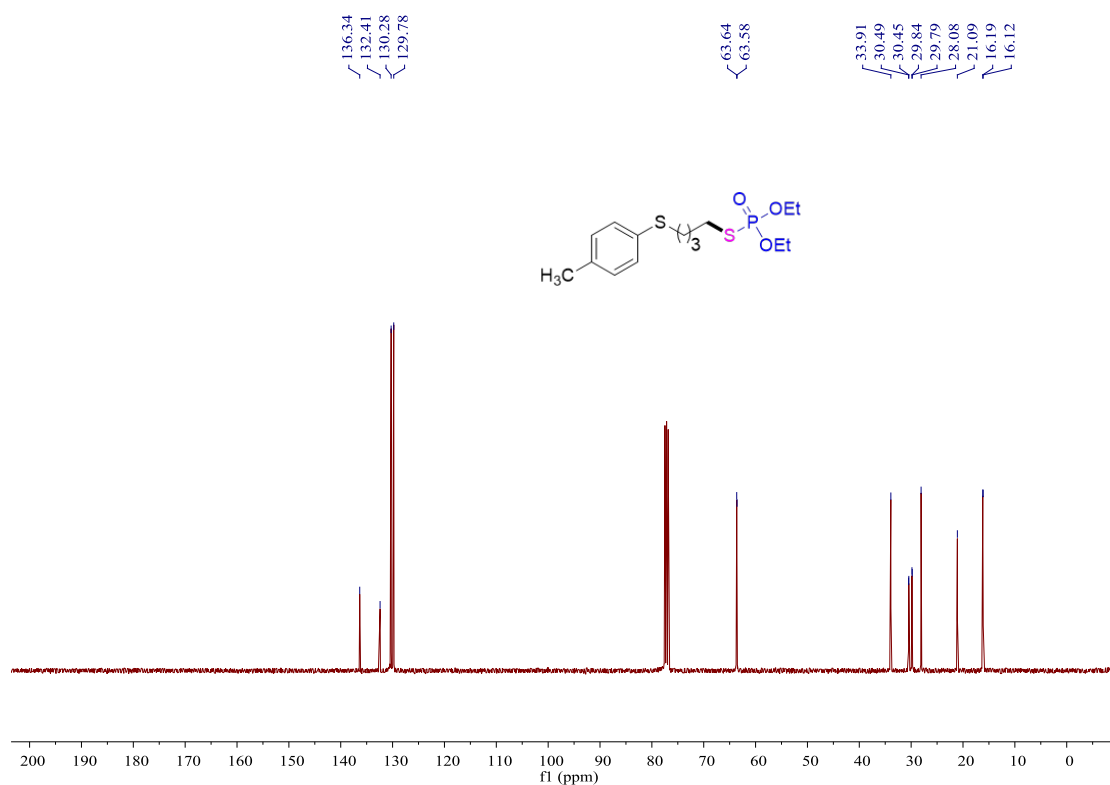

<sup>13</sup>C NMR (101 MHz, CDCl<sub>3</sub>) spectra of **5ba**

— 27.97

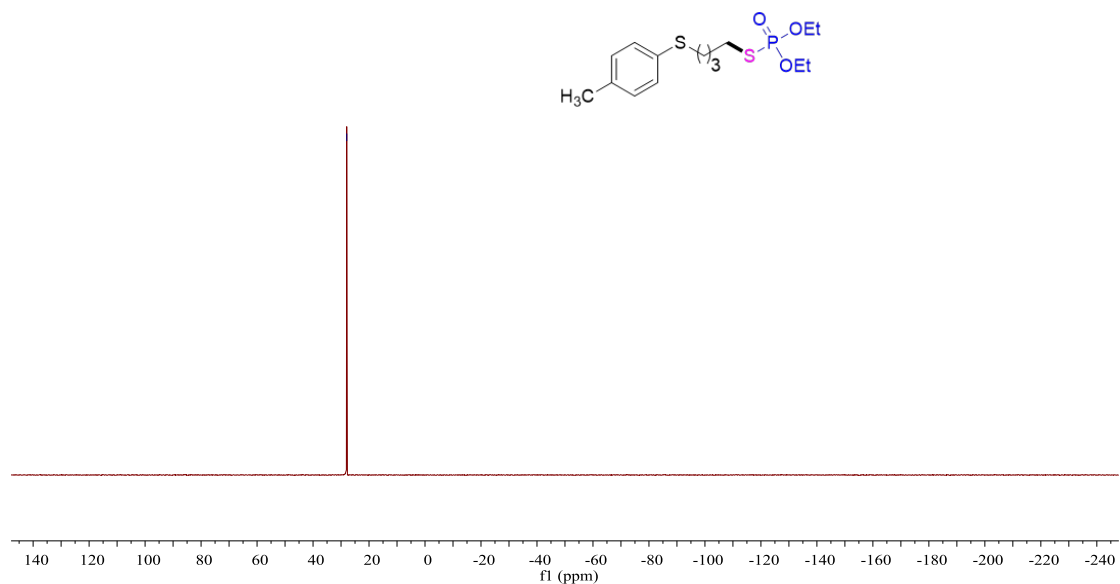

<sup>31</sup>P NMR (162 MHz, CDCl<sub>3</sub>) spectra of **5ba**

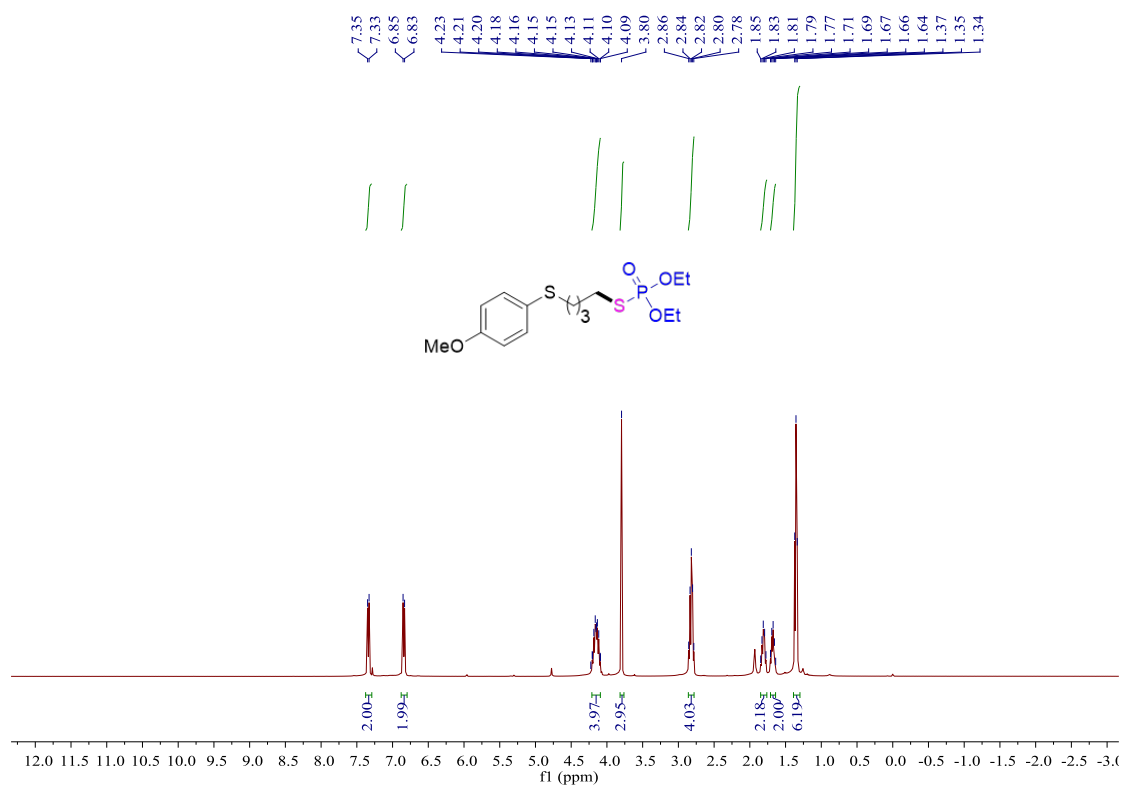

<sup>1</sup>H NMR (400 MHz, CDCl<sub>3</sub>) spectra of **5ca**

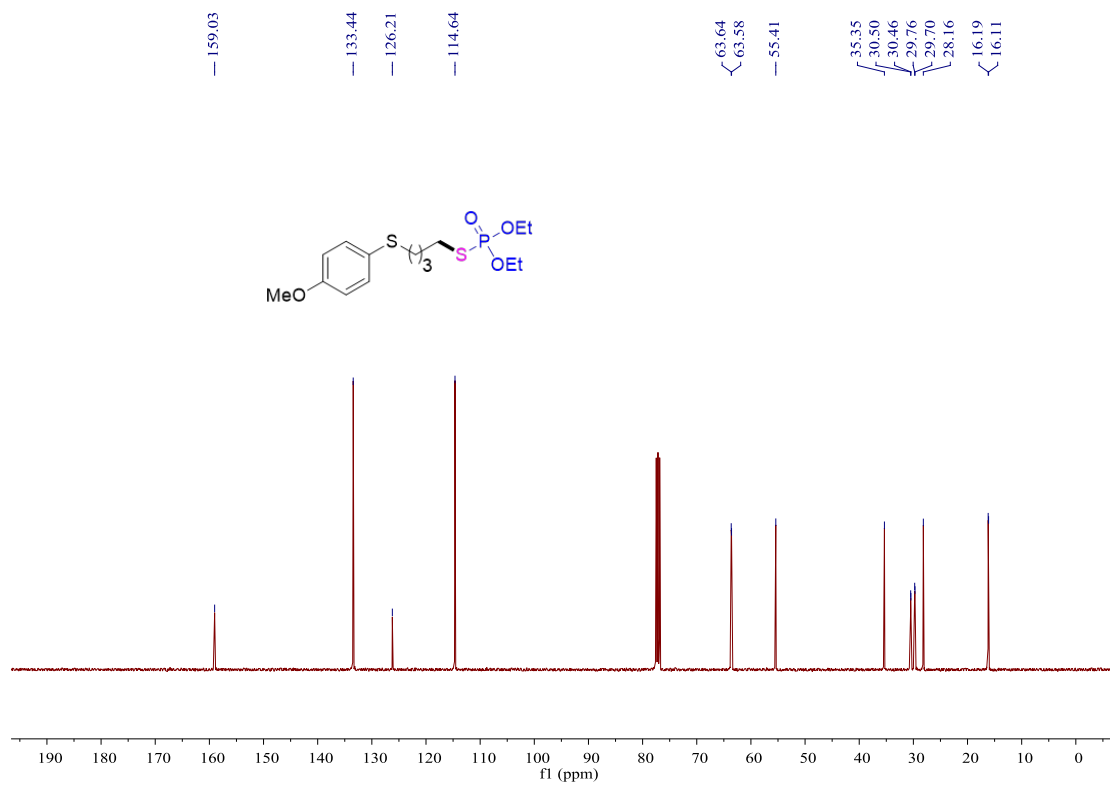

$^{13}\text{C}$  NMR (101 MHz,  $\text{CDCl}_3$ ) spectra of **5ca**

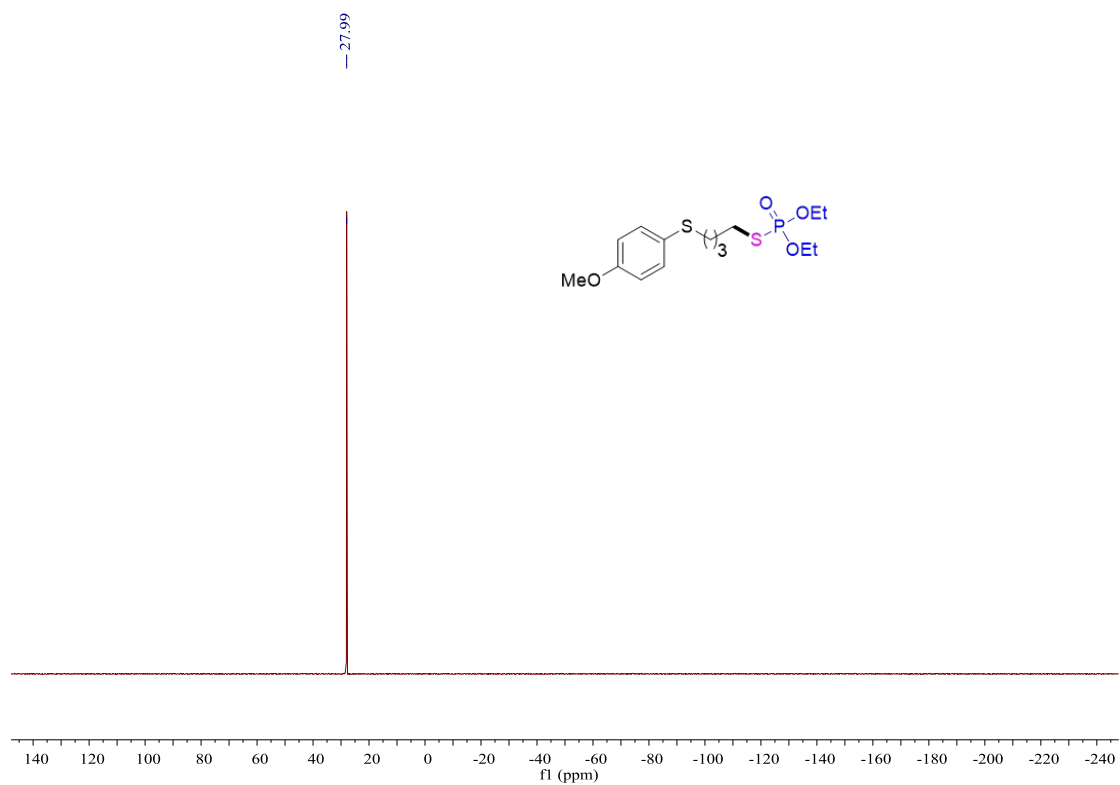

$^{31}\text{P}$  NMR (162 MHz,  $\text{CDCl}_3$ ) spectra of **5ca**



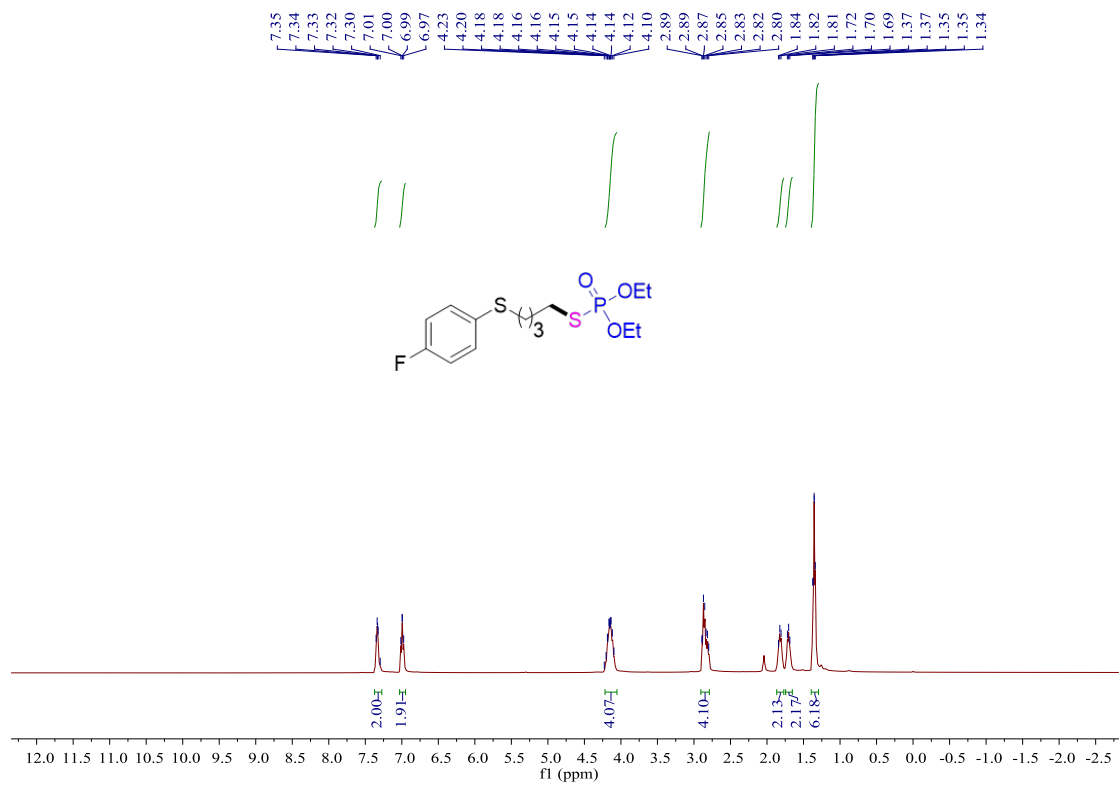

<sup>1</sup>H NMR (400 MHz, CDCl<sub>3</sub>) spectra of **5da**

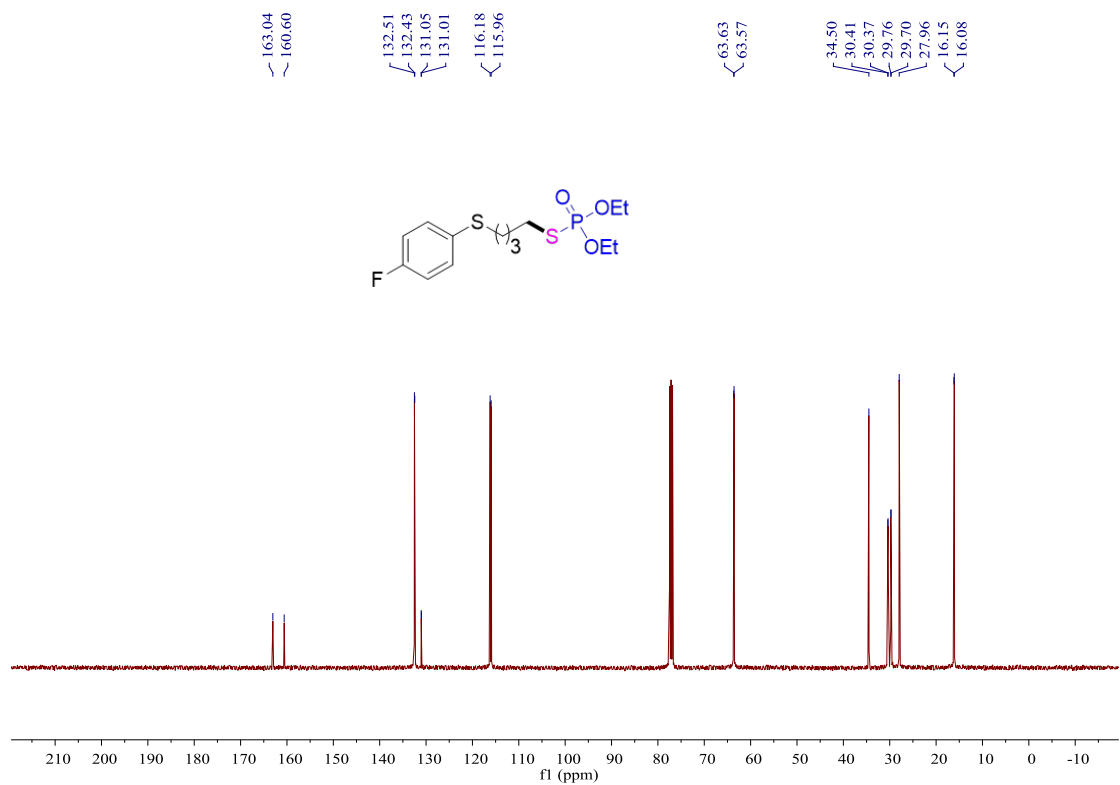

<sup>13</sup>C NMR (101 MHz, CDCl<sub>3</sub>) spectra of **5da**

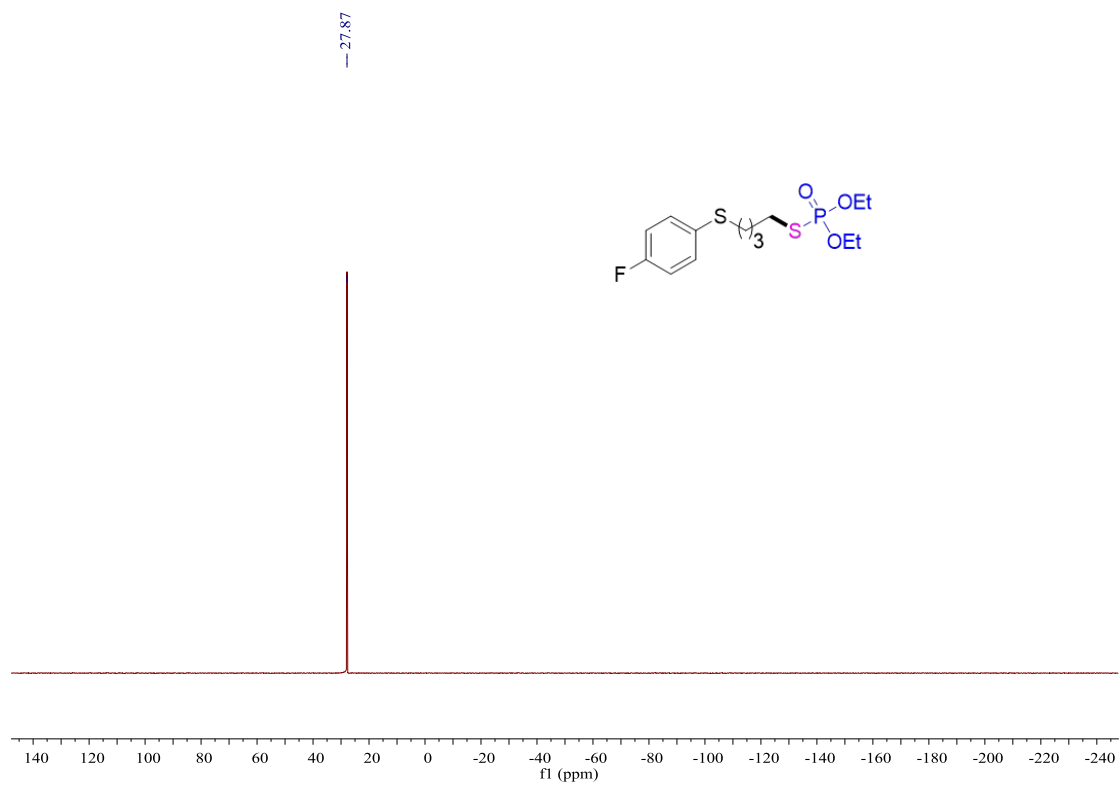

$^{31}\text{P}$  NMR (162 MHz,  $\text{CDCl}_3$ ) spectra of **5da**

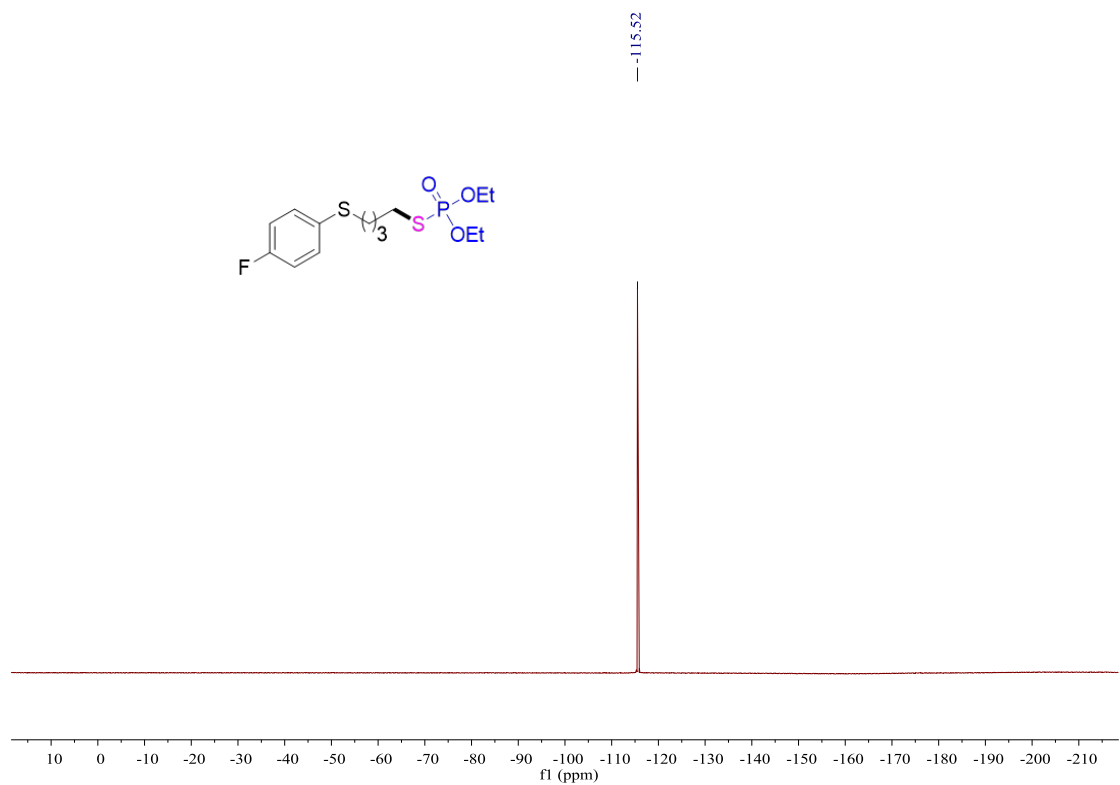

$^{19}\text{F}$  NMR (376 MHz,  $\text{CDCl}_3$ ) spectra of **5da**

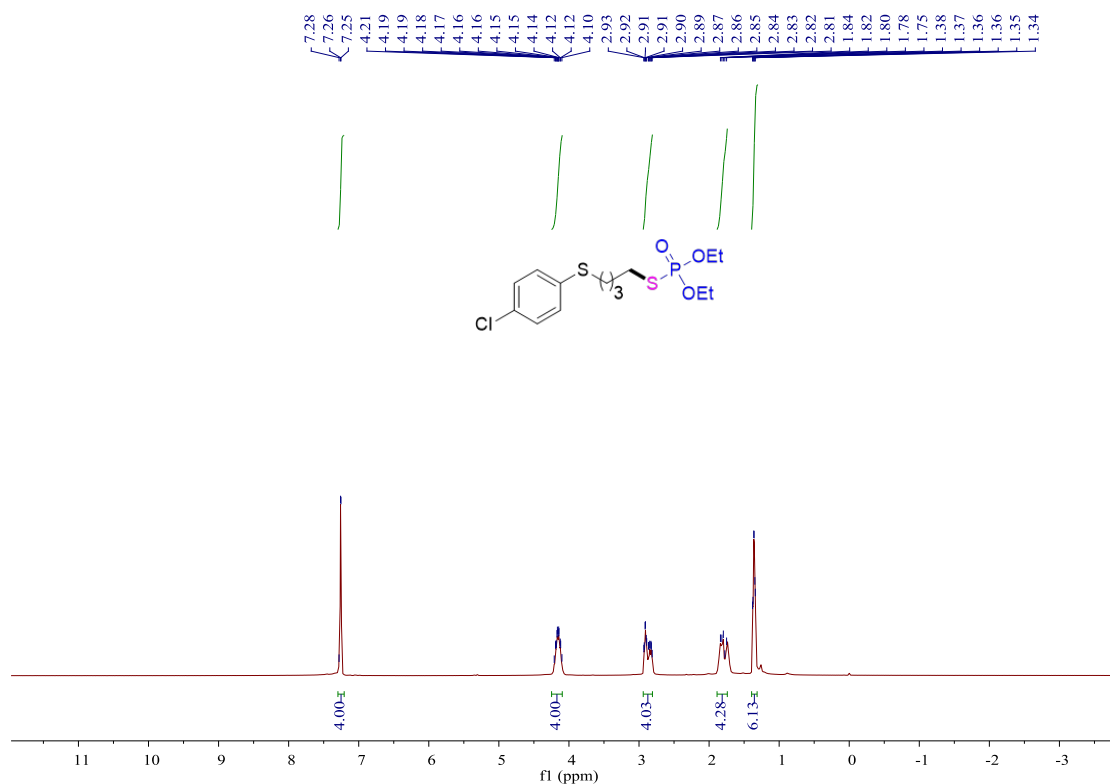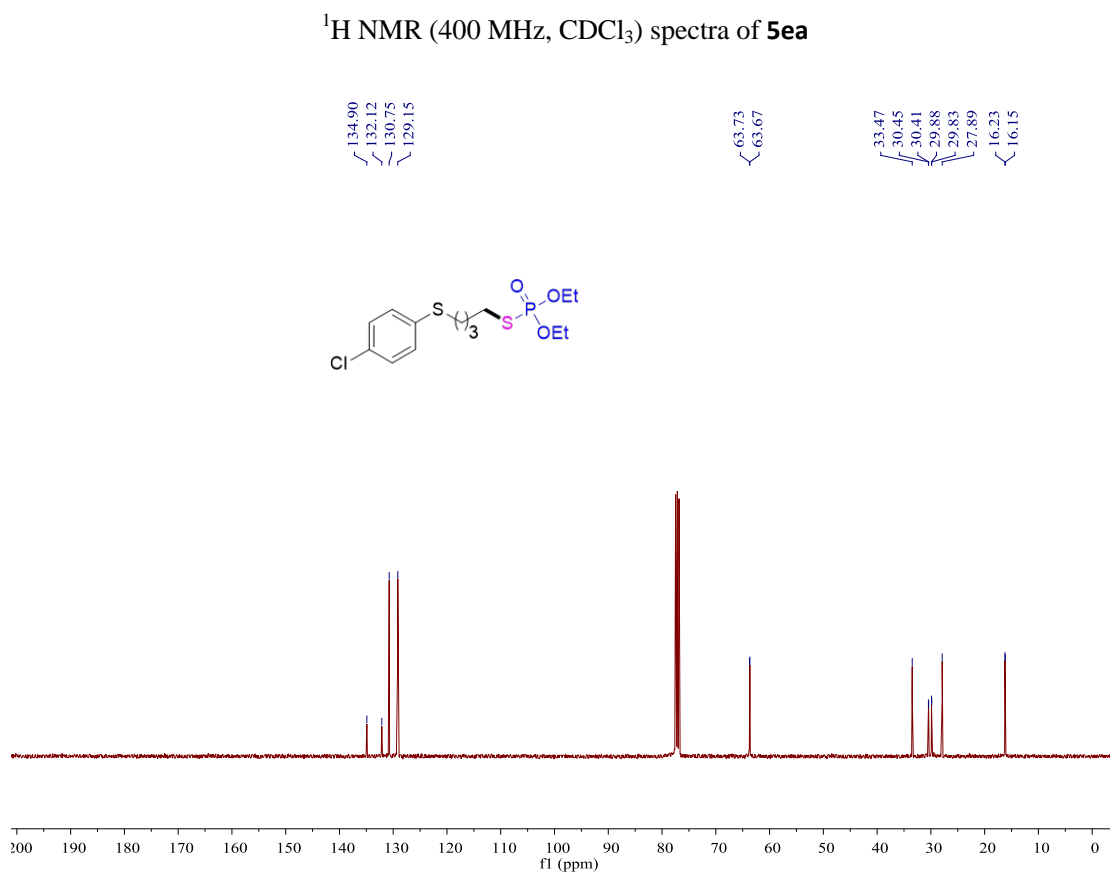

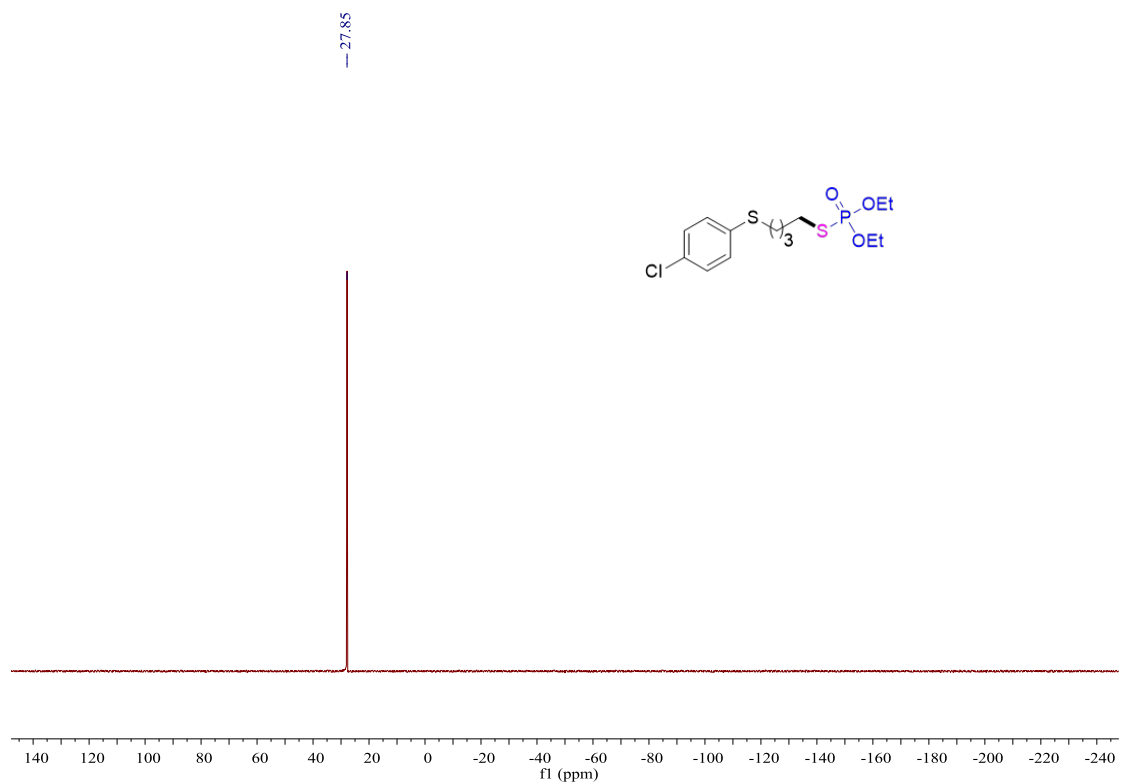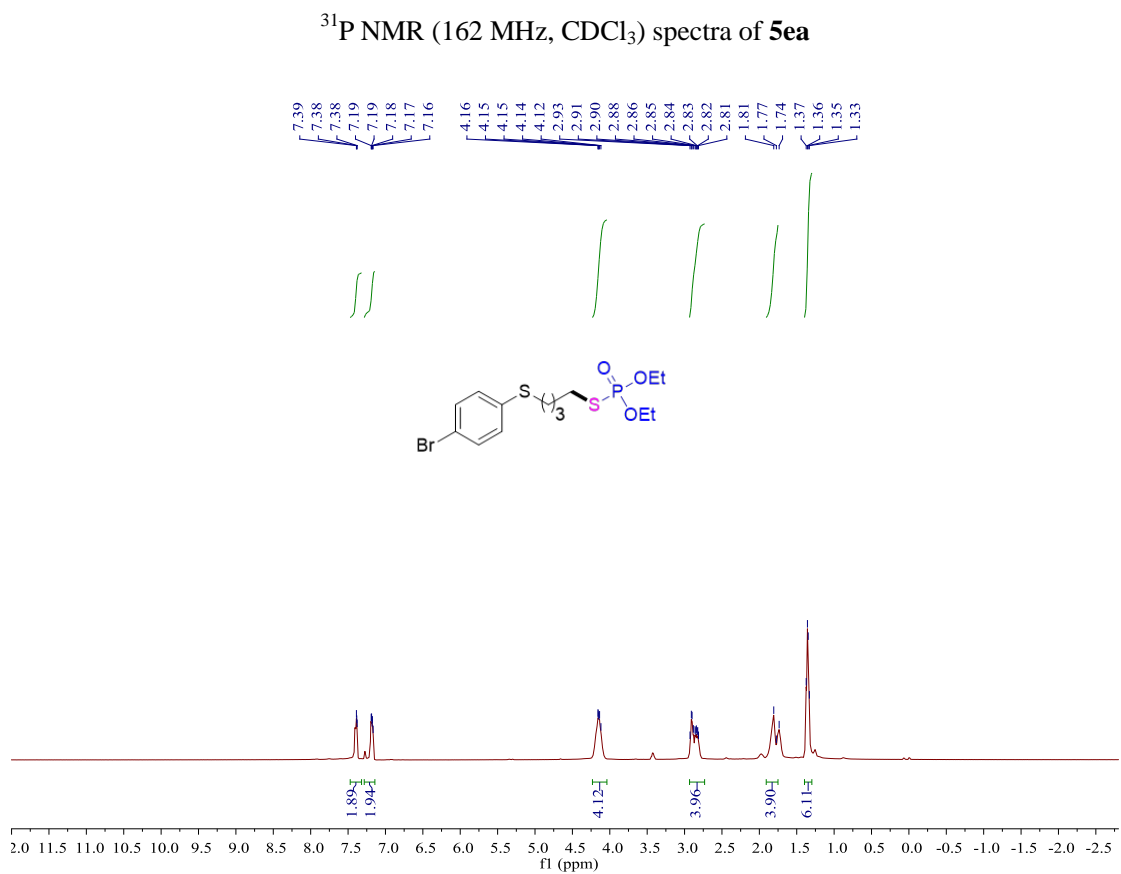

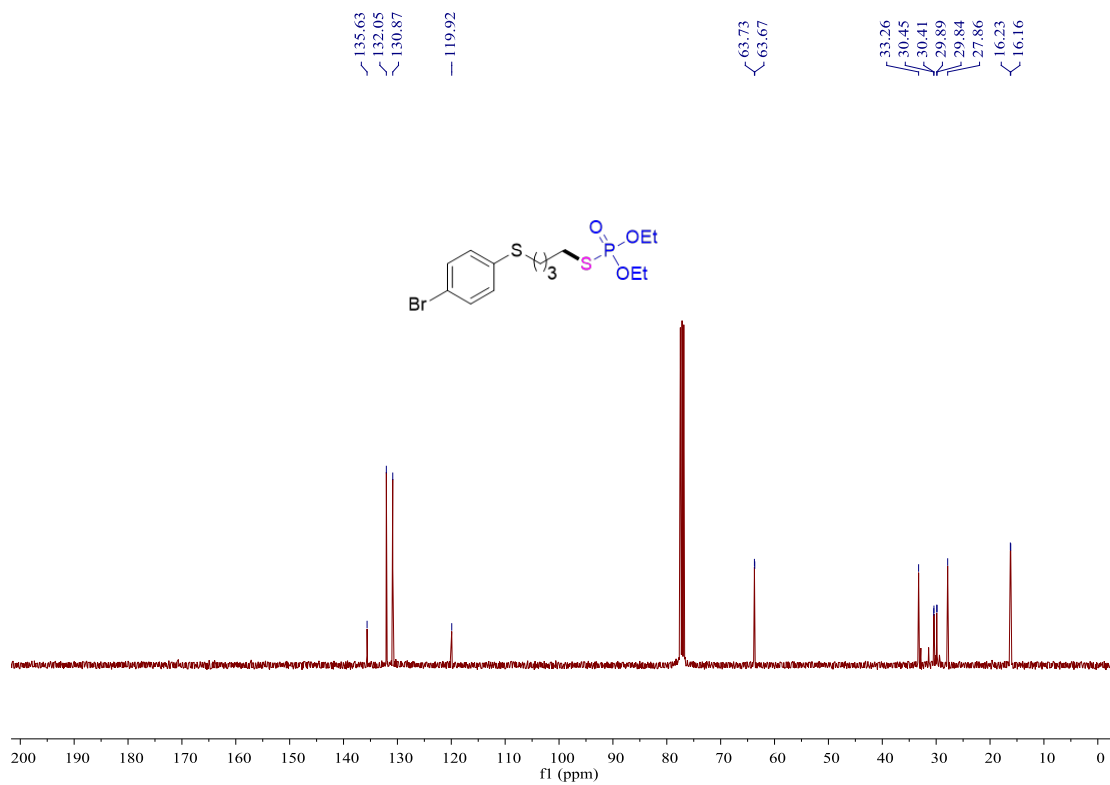

$^{13}\text{C}$  NMR (101 MHz,  $\text{CDCl}_3$ ) spectra of **5fa**

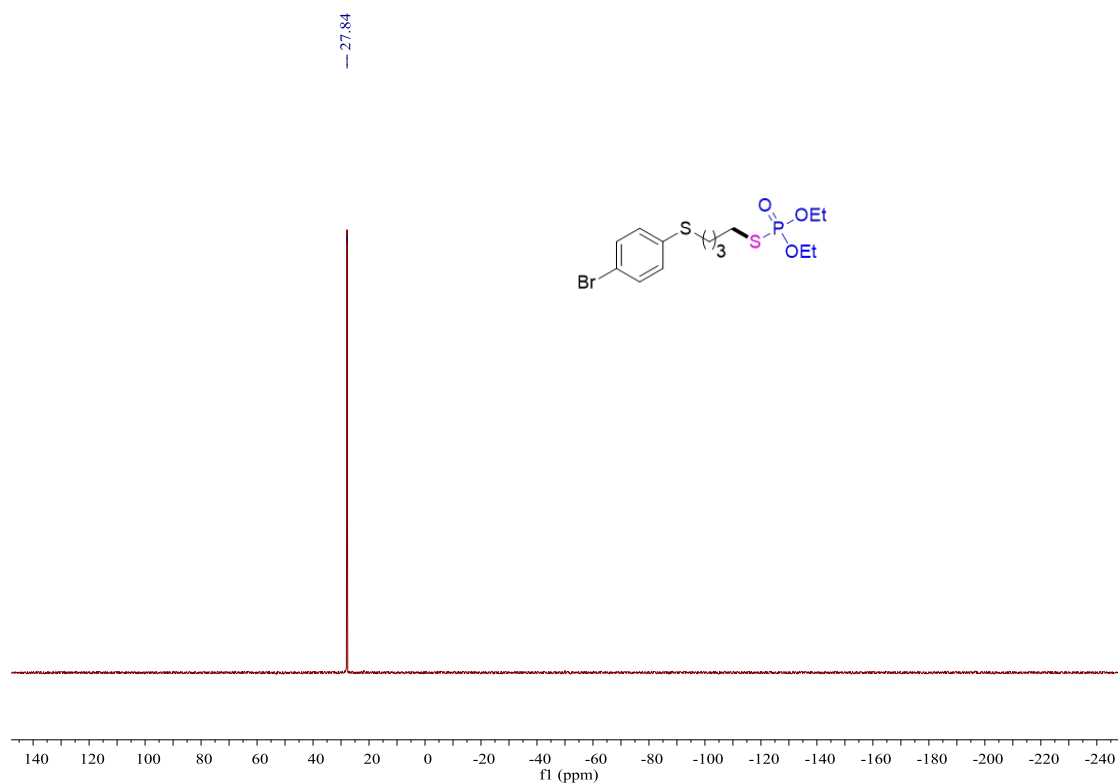

$^{31}\text{P}$  NMR (162 MHz,  $\text{CDCl}_3$ ) spectra of **5fa**

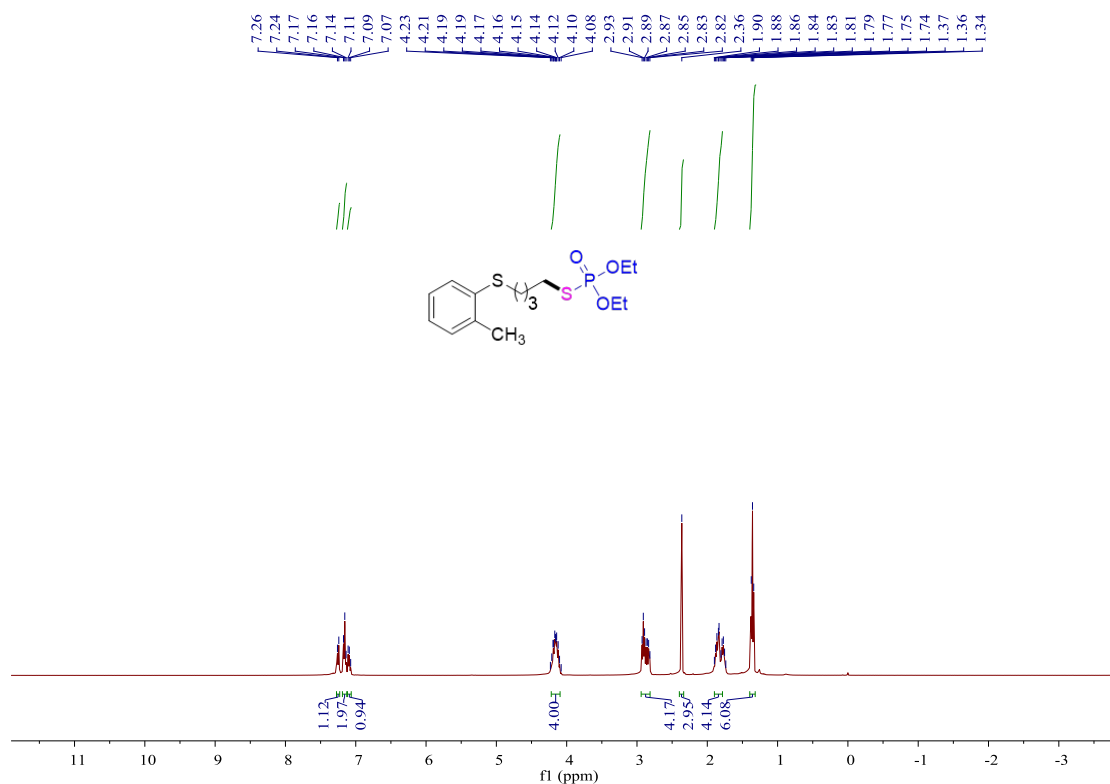

<sup>1</sup>H NMR (400 MHz, CDCl<sub>3</sub>) spectra of **5ga**

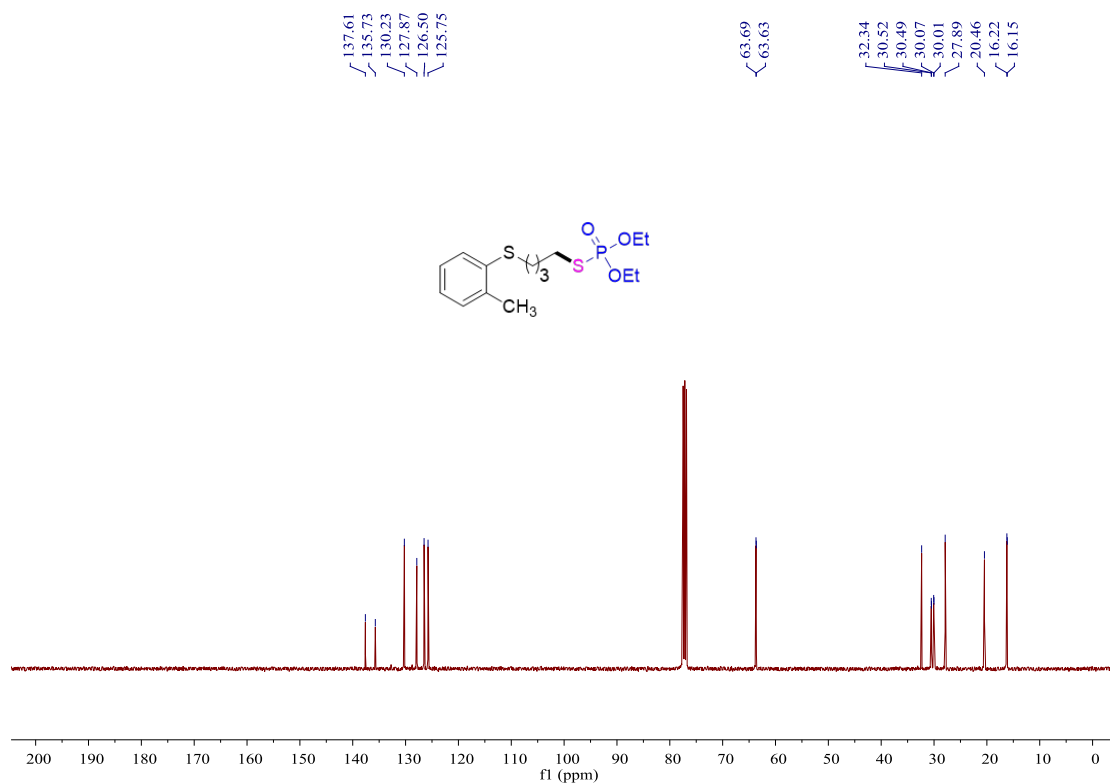

<sup>13</sup>C NMR (101 MHz, CDCl<sub>3</sub>) spectra of **5ga**

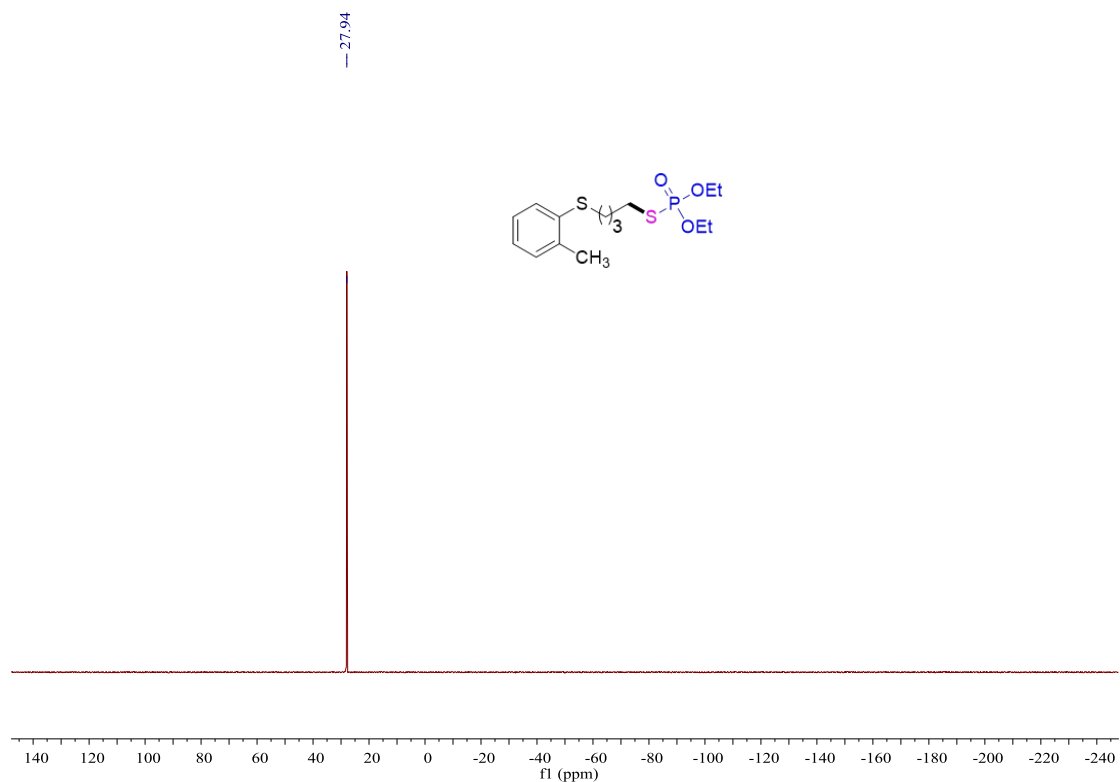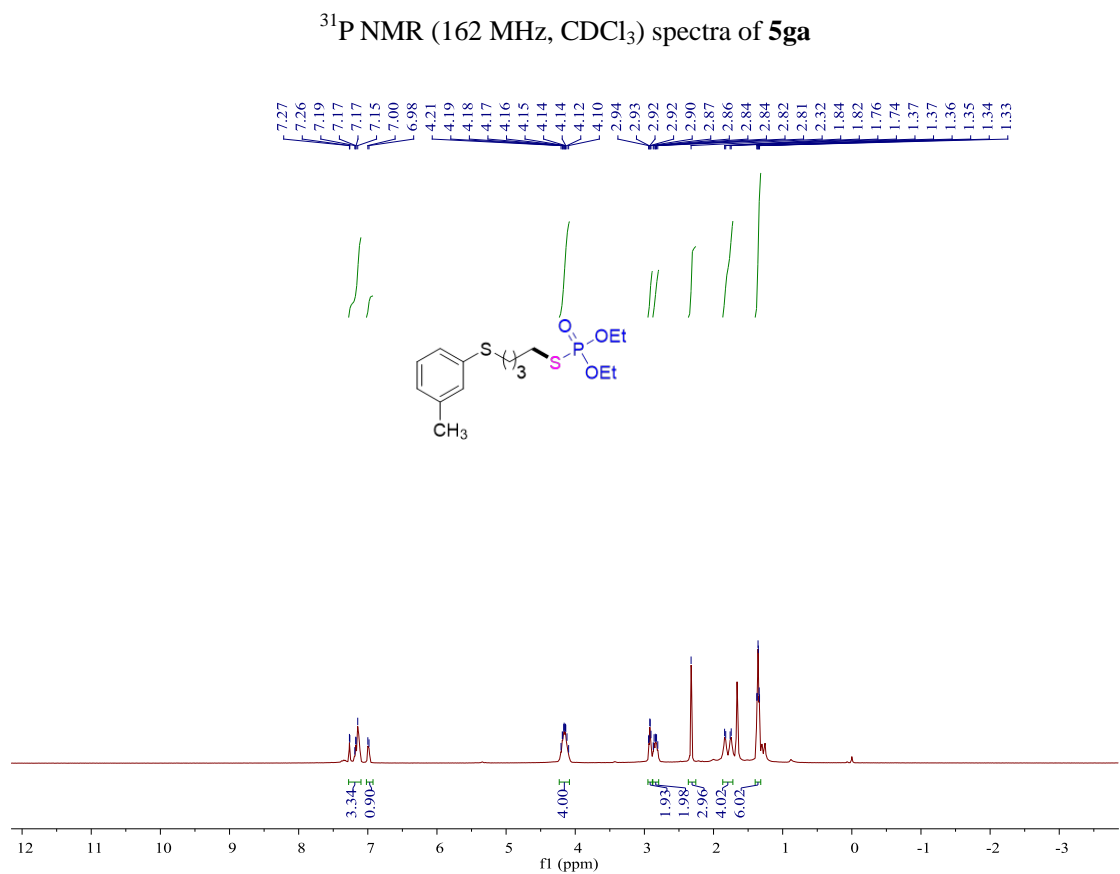

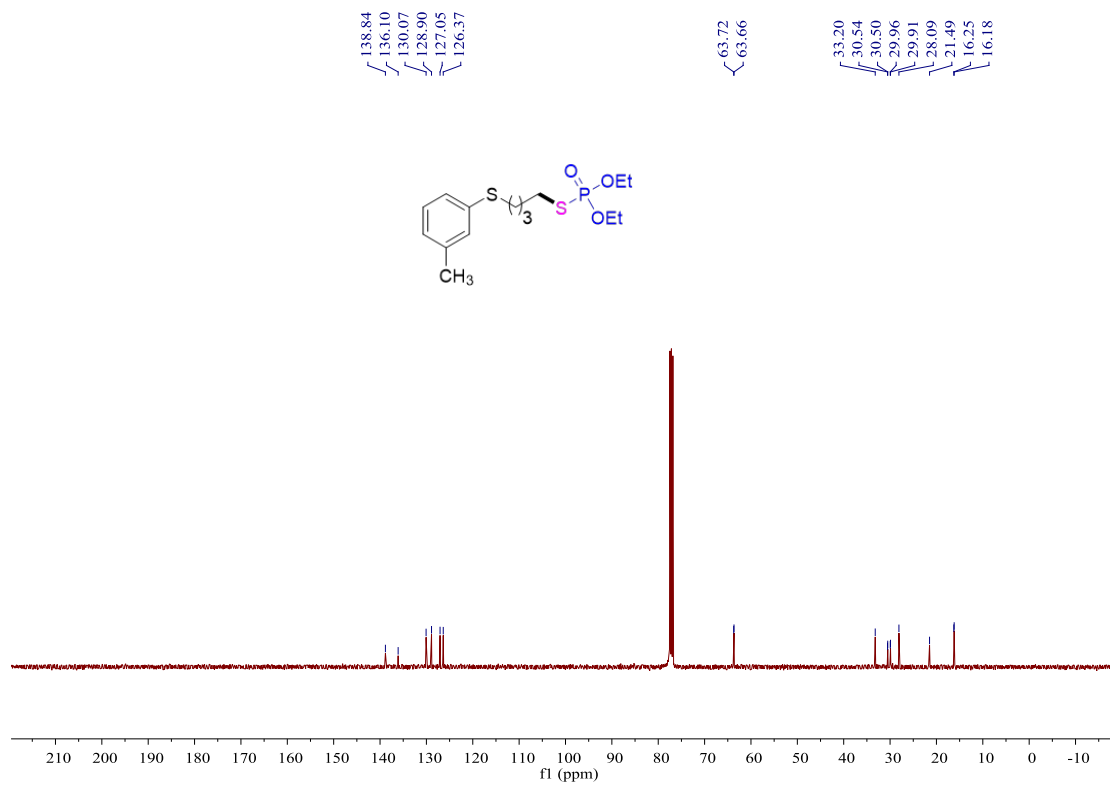

<sup>13</sup>C NMR (101 MHz, CDCl<sub>3</sub>) spectra of **5ha**

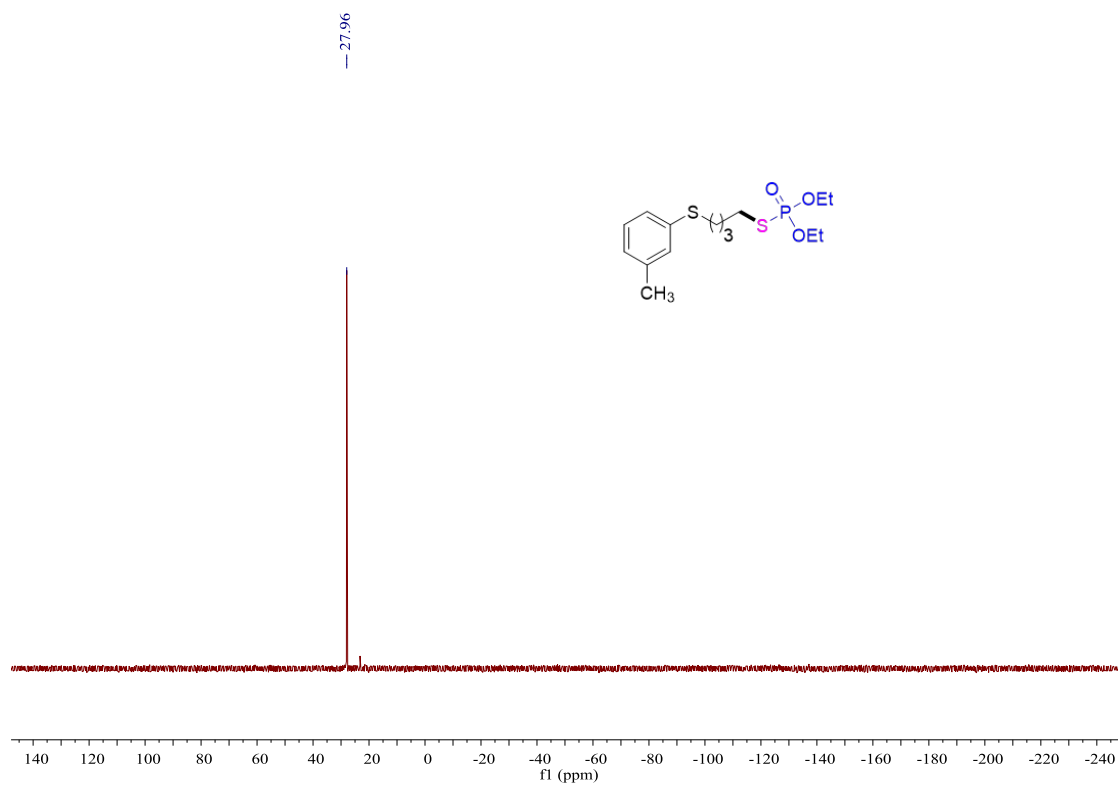

<sup>31</sup>P NMR (162 MHz, CDCl<sub>3</sub>) spectra of **5ha**



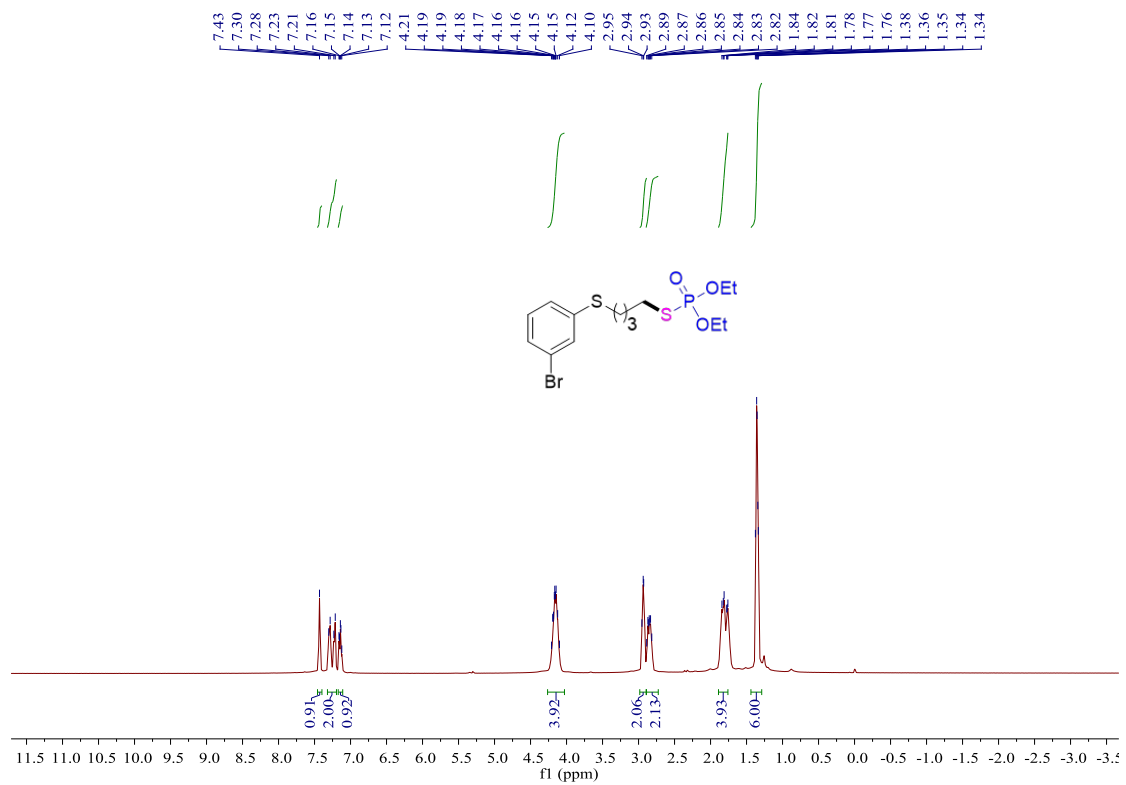

<sup>1</sup>H NMR (400 MHz, CDCl<sub>3</sub>) spectra of **5ia**

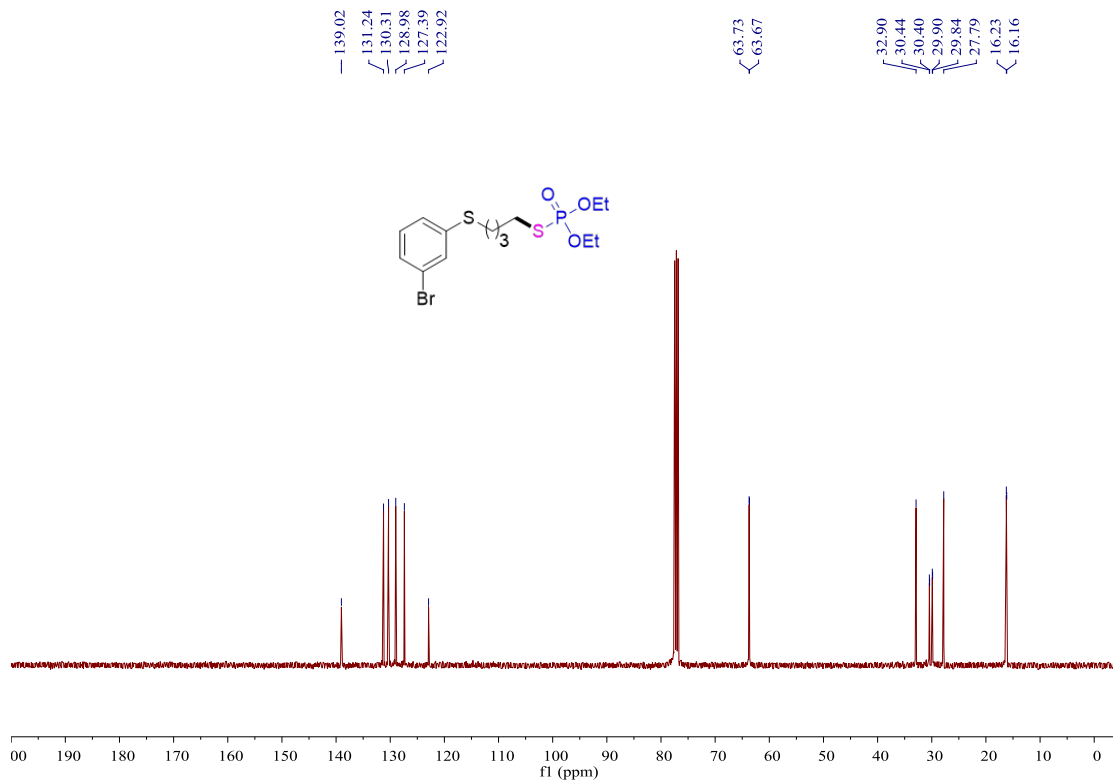

<sup>13</sup>C NMR (101 MHz, CDCl<sub>3</sub>) spectra of **5ia**

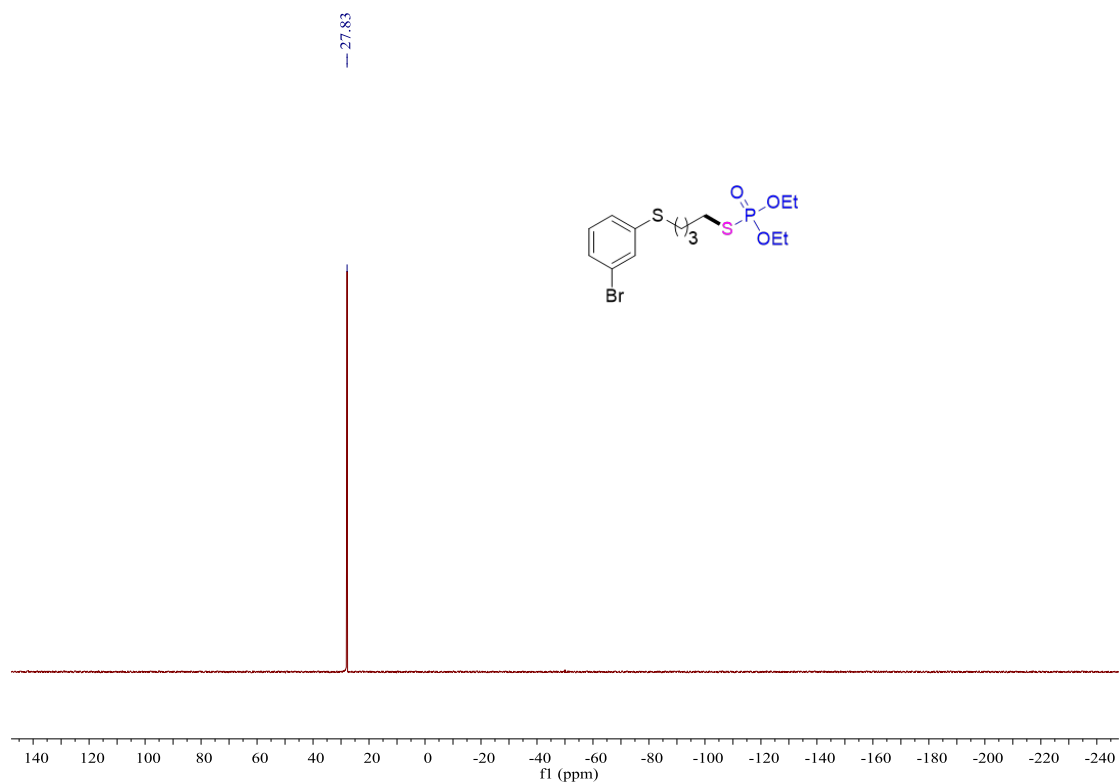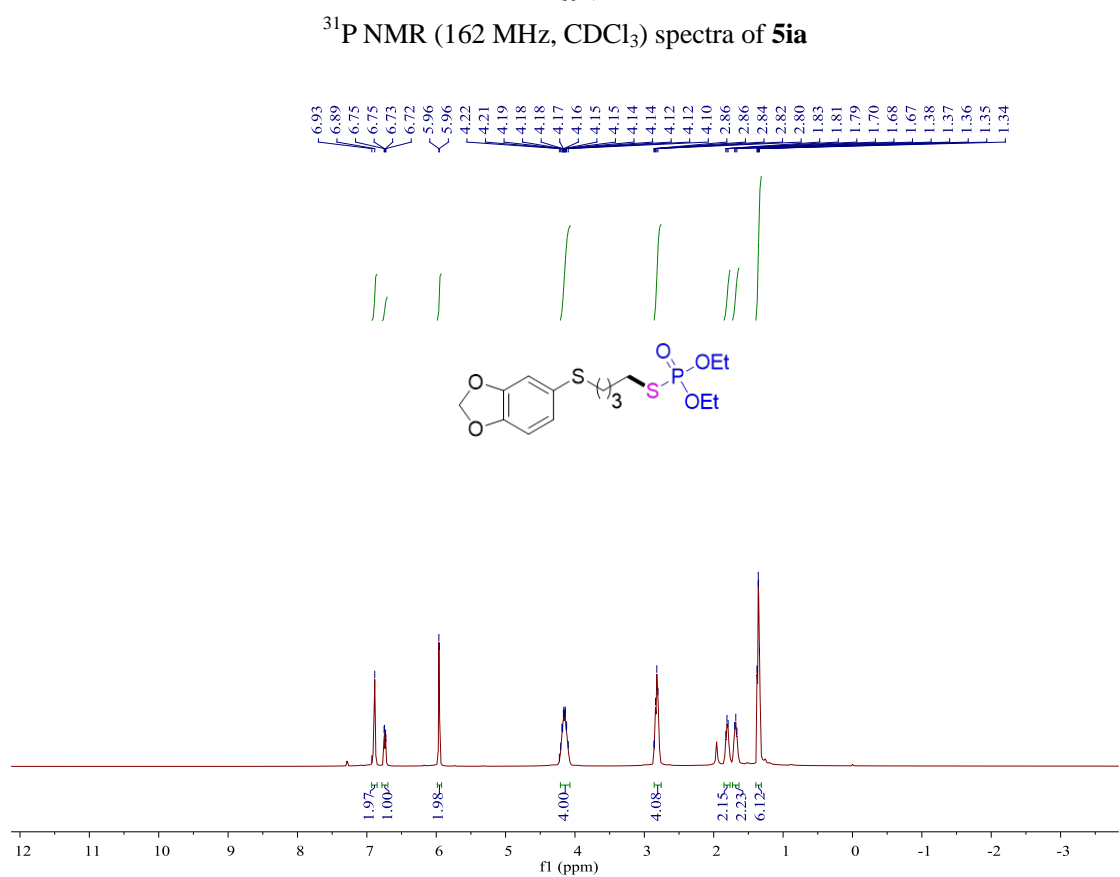

148.05  
 147.14  
 127.81  
 125.51  
 112.12  
 108.77  
 101.35  
 63.64  
 63.58  
 35.29  
 30.47  
 30.43  
 29.76  
 29.70  
 28.08  
 16.18  
 16.11

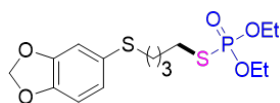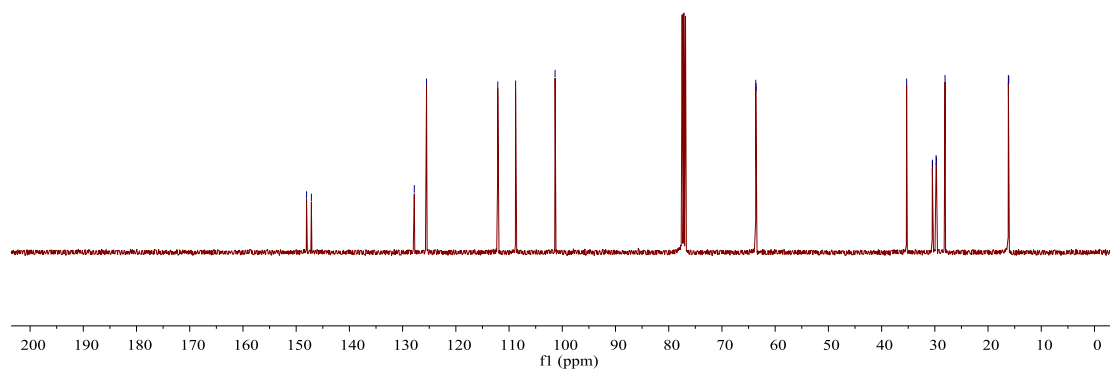

$^{13}\text{C}$  NMR (101 MHz,  $\text{CDCl}_3$ ) spectra of **5ja**

27.95

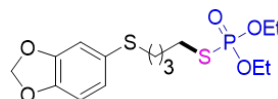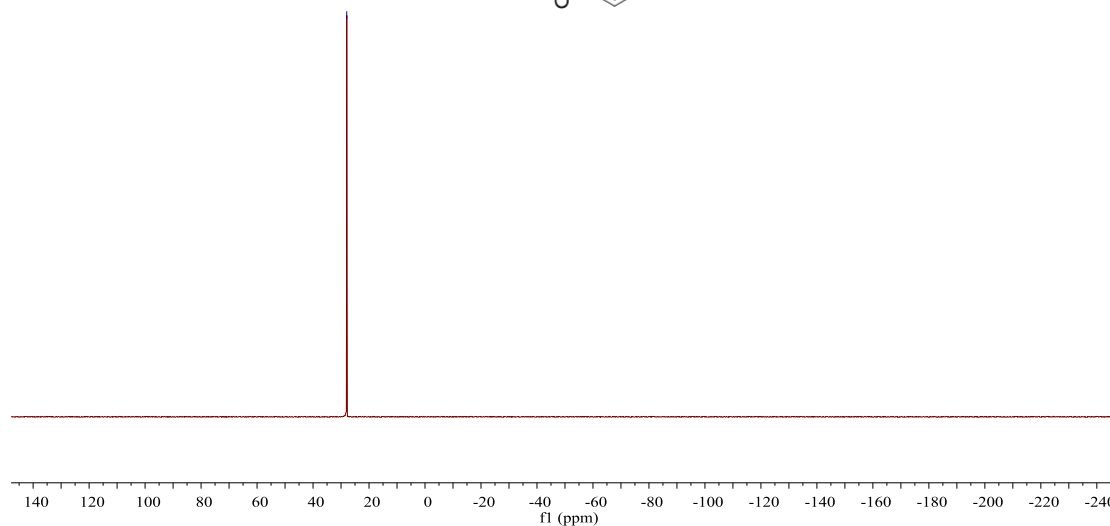

$^{31}\text{P}$  NMR (162 MHz,  $\text{CDCl}_3$ ) spectra of **5ja**

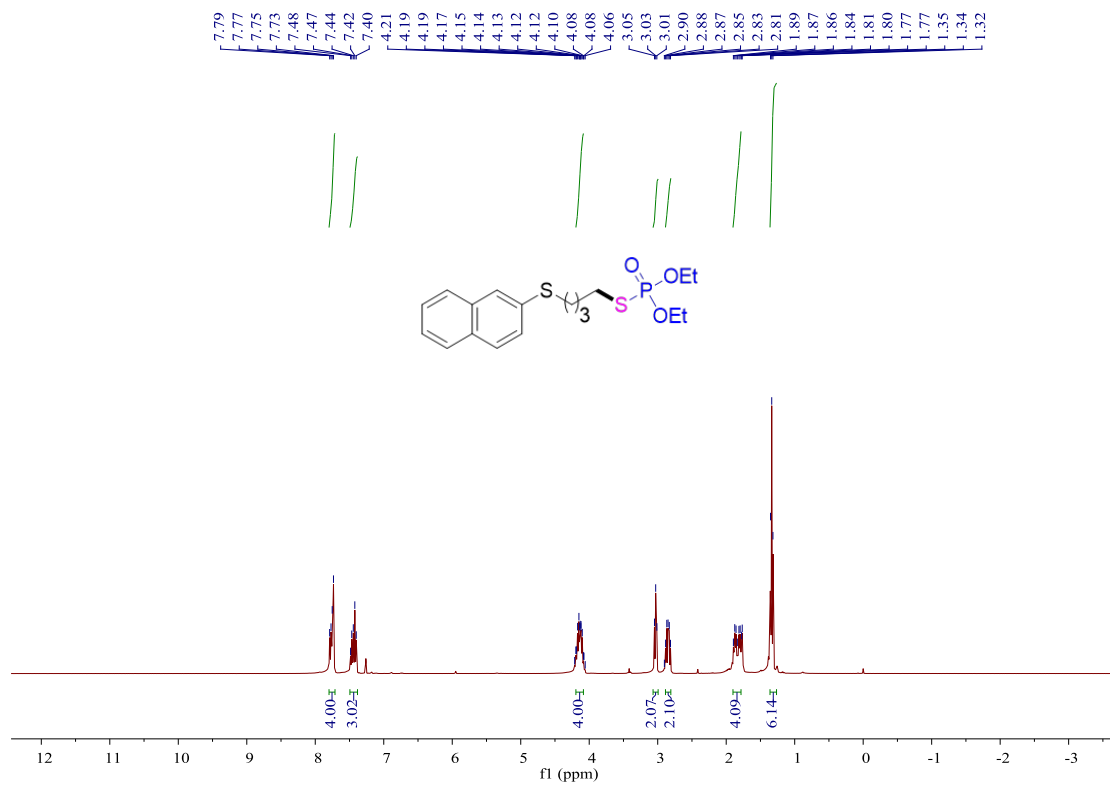

<sup>1</sup>H NMR (400 MHz, CDCl<sub>3</sub>) spectra of **5ka**

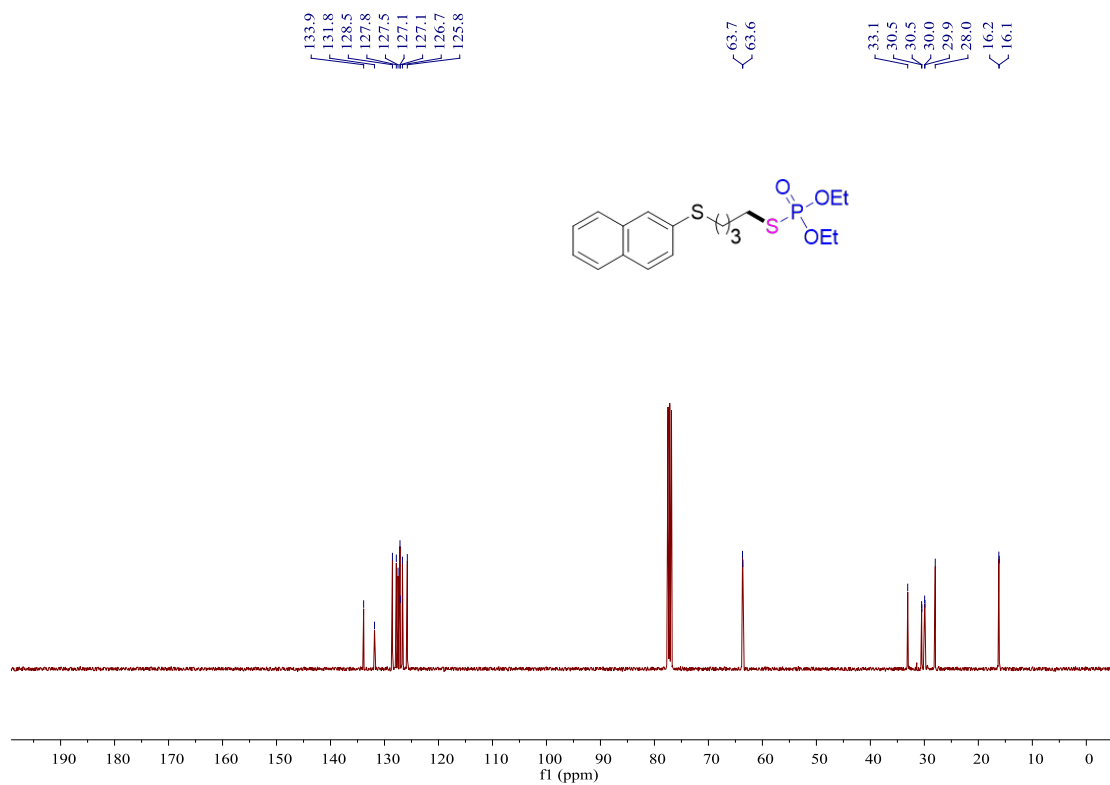

<sup>13</sup>C NMR (101 MHz, CDCl<sub>3</sub>) spectra of **5ka**

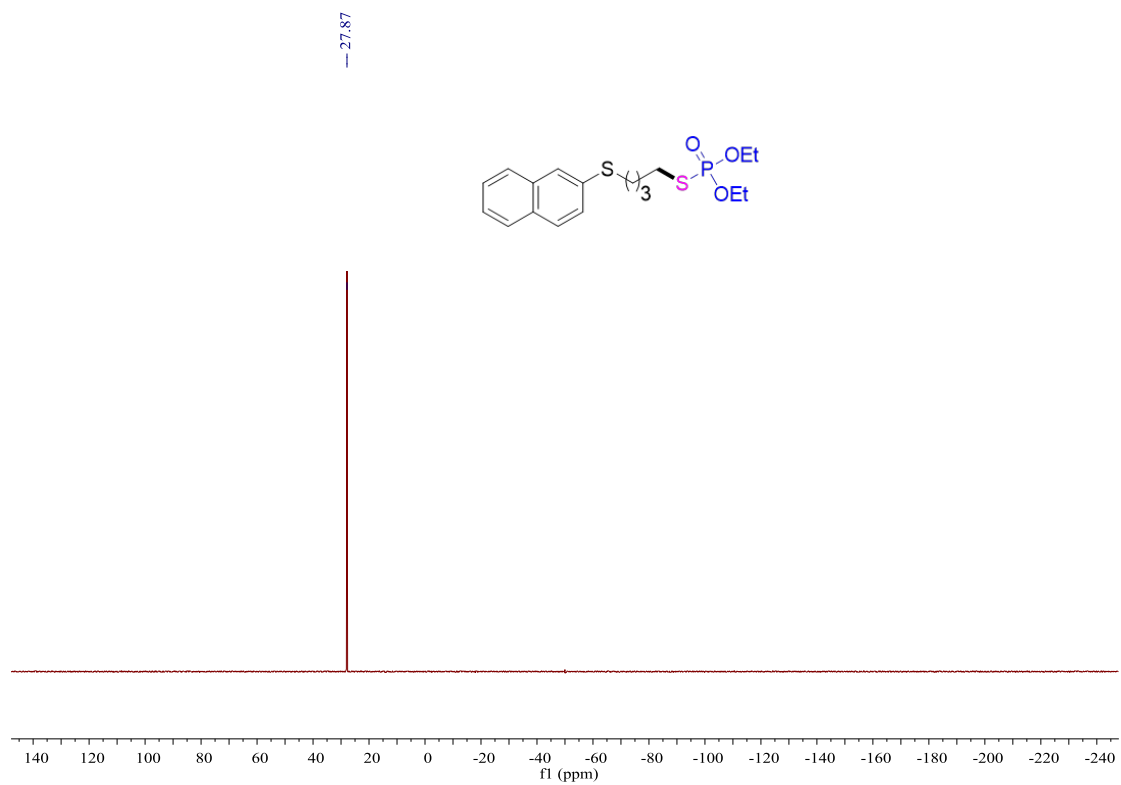

<sup>31</sup>P NMR (162 MHz, CDCl<sub>3</sub>) spectra of **5ka**

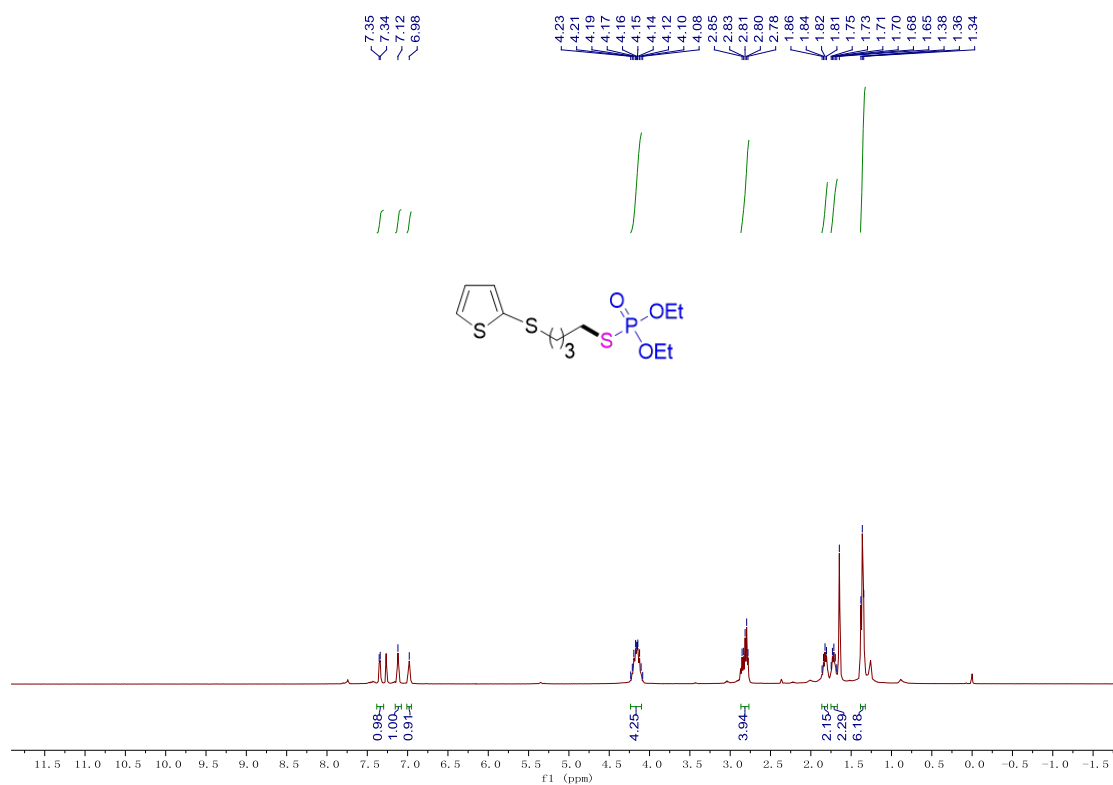

<sup>1</sup>H NMR (400 MHz, CDCl<sub>3</sub>) spectra of **5la**

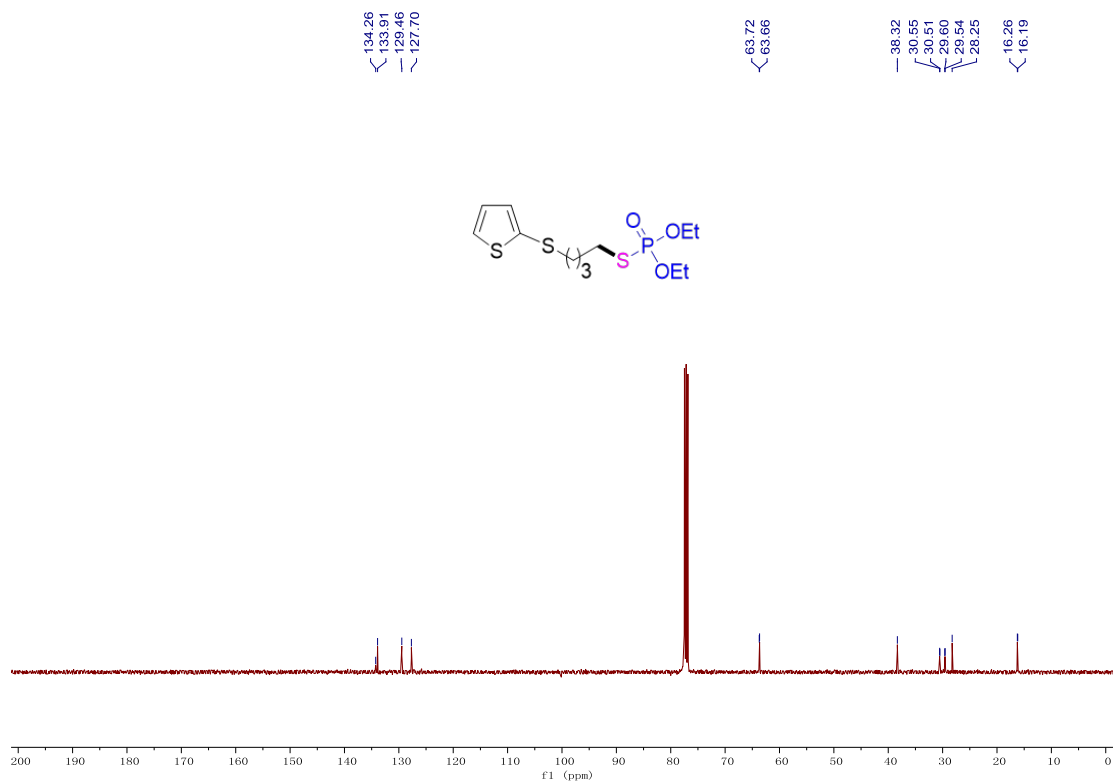

$^{13}\text{C}$  NMR (101 MHz,  $\text{CDCl}_3$ ) spectra of **5a**

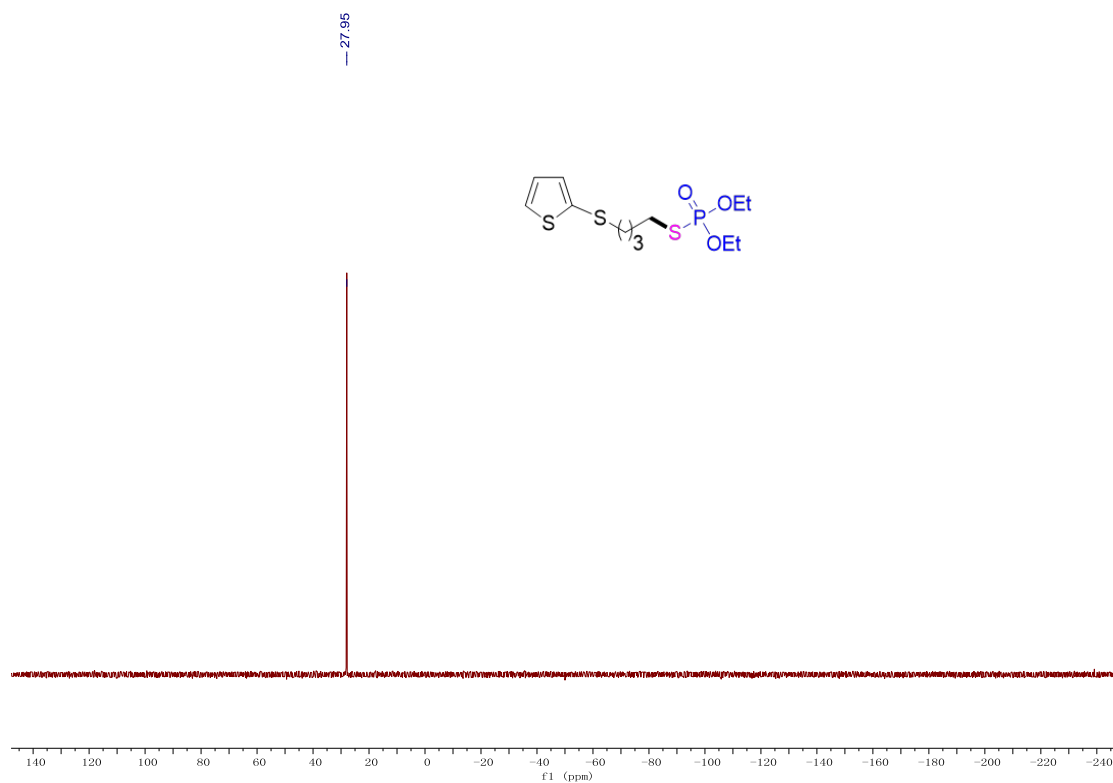

$^{31}\text{P}$  NMR (162 MHz,  $\text{CDCl}_3$ ) spectra of **5a**

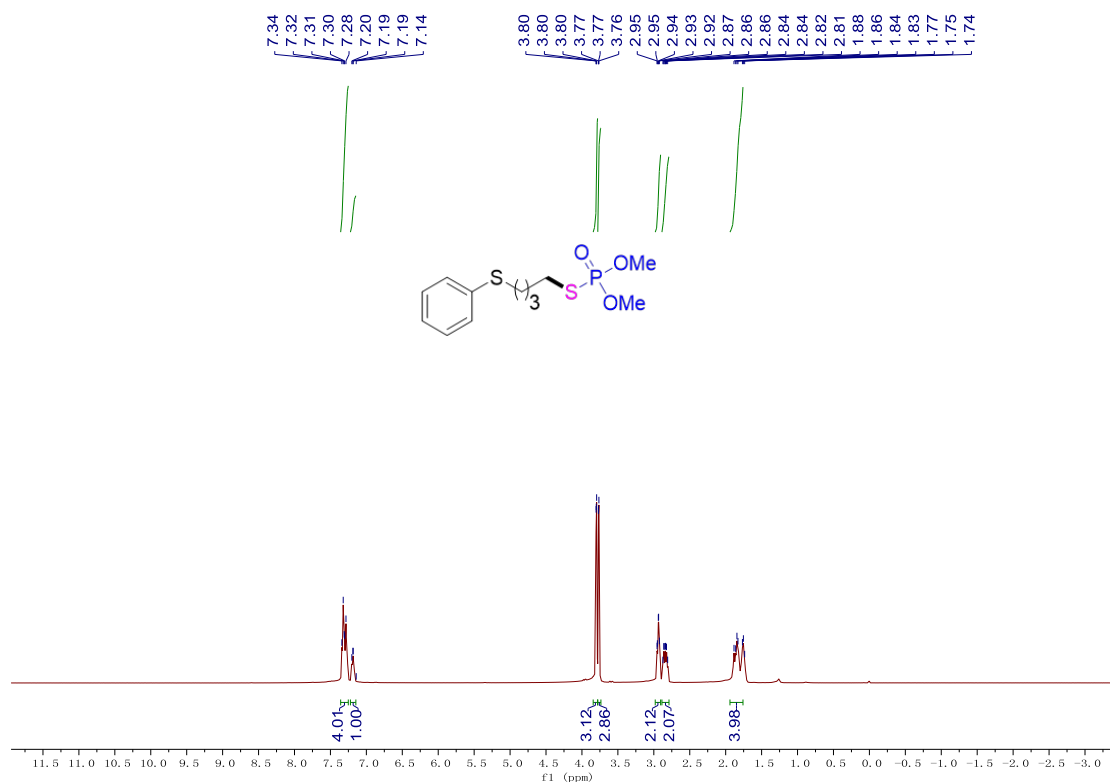

<sup>1</sup>H NMR (400 MHz, CDCl<sub>3</sub>) spectra of **5ab**

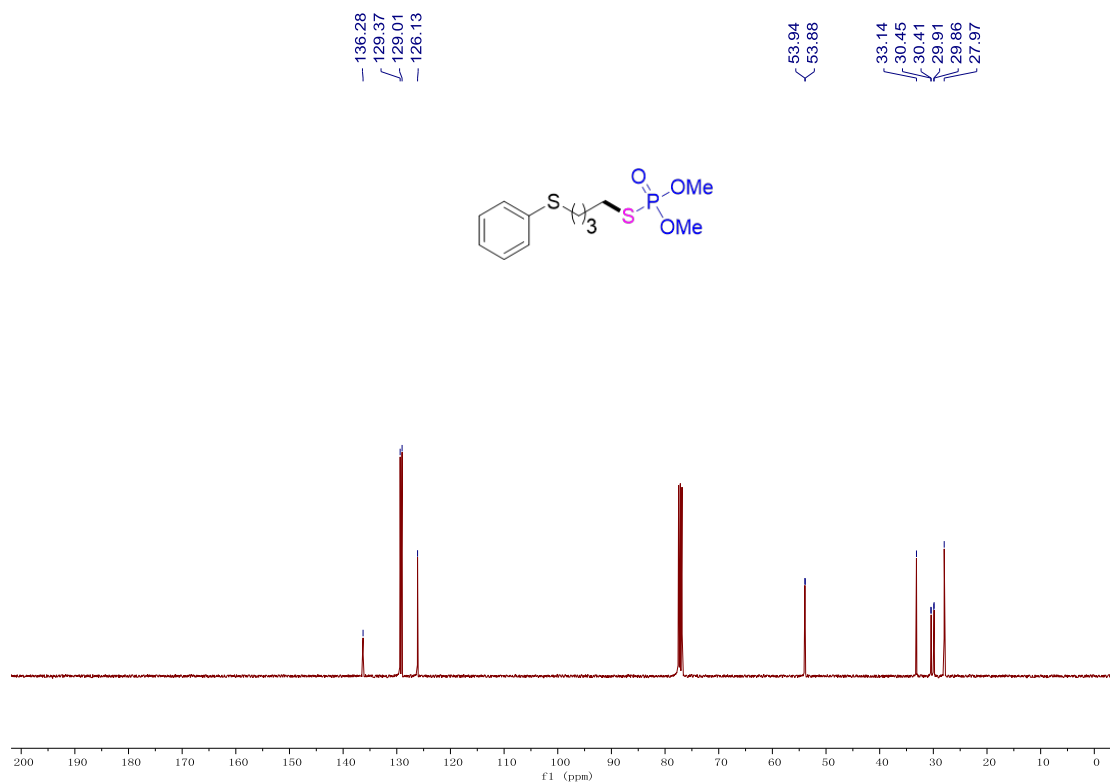

<sup>13</sup>C NMR (101 MHz, CDCl<sub>3</sub>) spectra of **5ab**

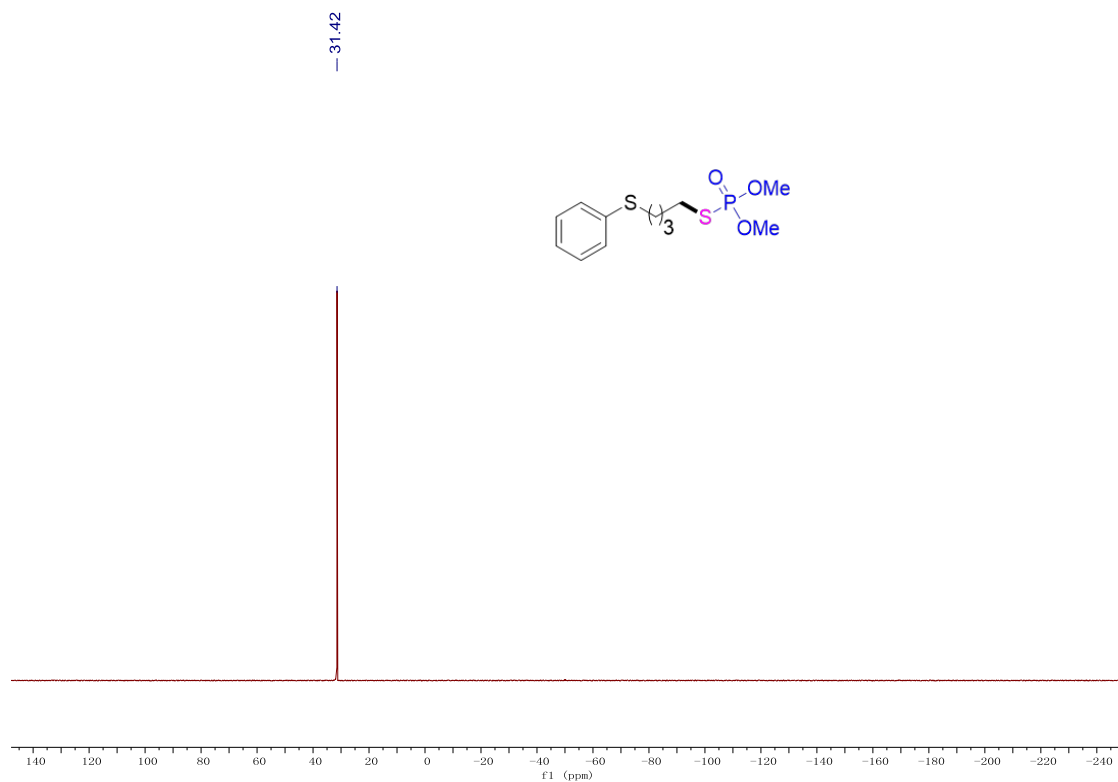

<sup>31</sup>P NMR (162 MHz, CDCl<sub>3</sub>) spectra of **5ab**

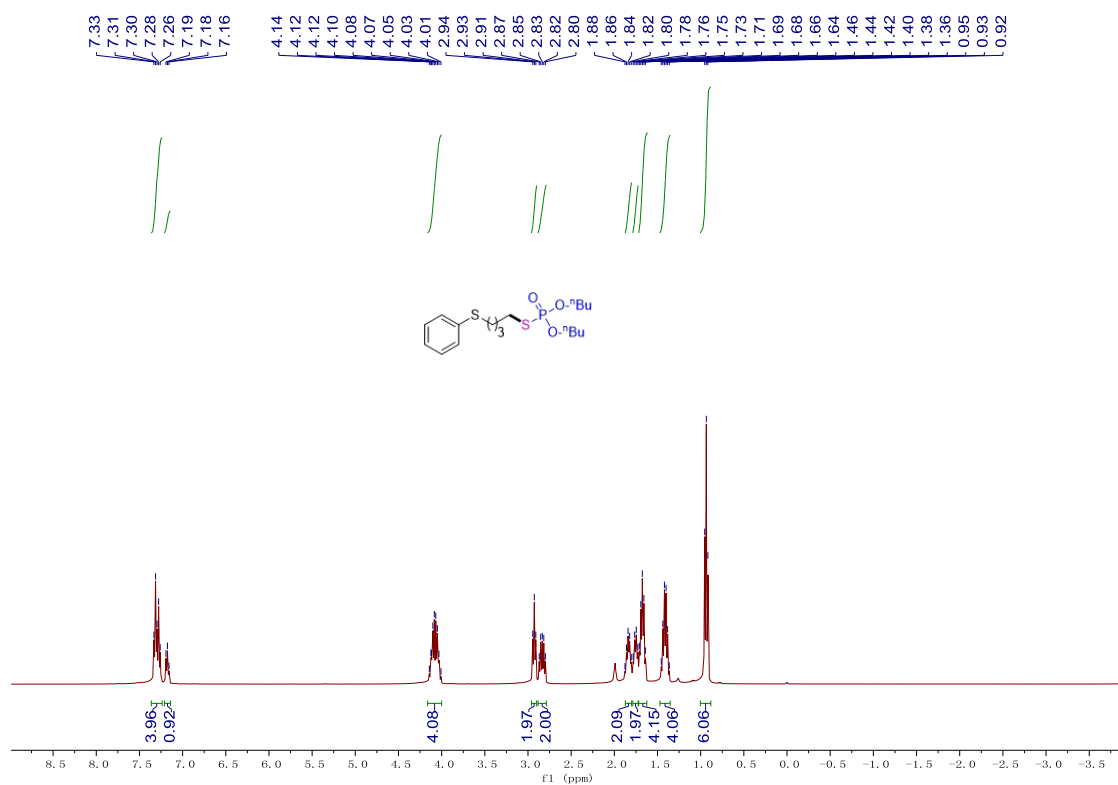

<sup>1</sup>H NMR (400 MHz, CDCl<sub>3</sub>) spectra of **5ac**



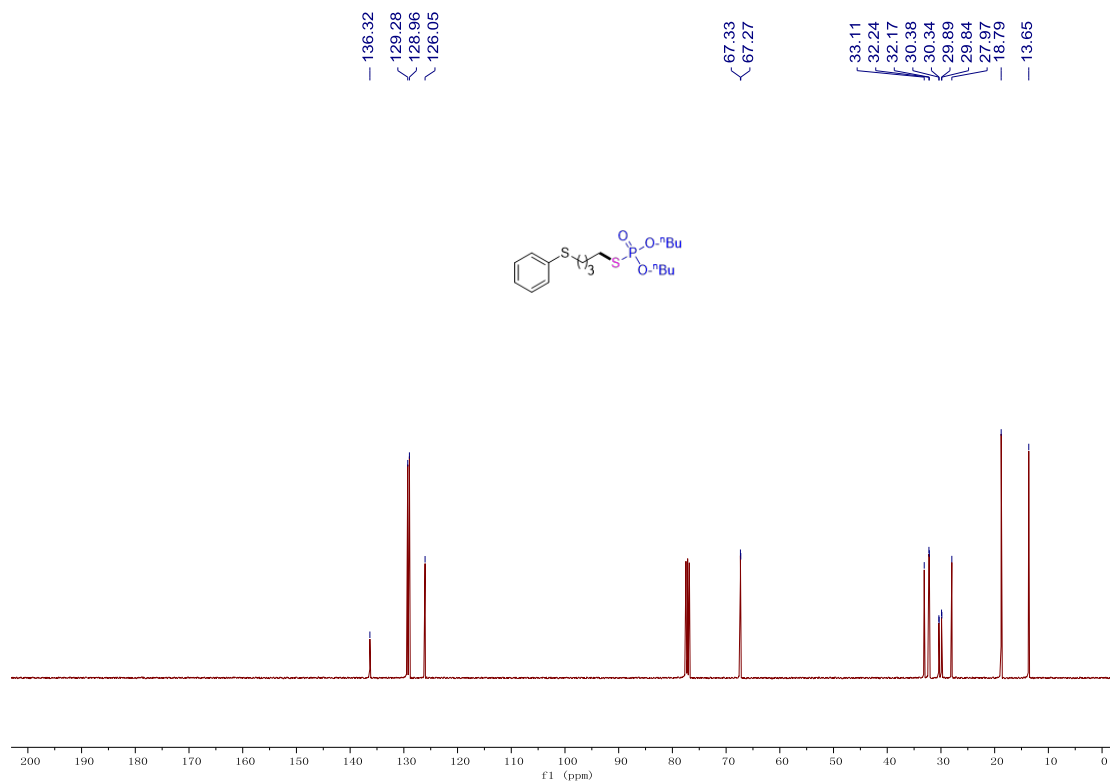

$^{13}\text{C}$  NMR (101 MHz,  $\text{CDCl}_3$ ) spectra of **5ac**

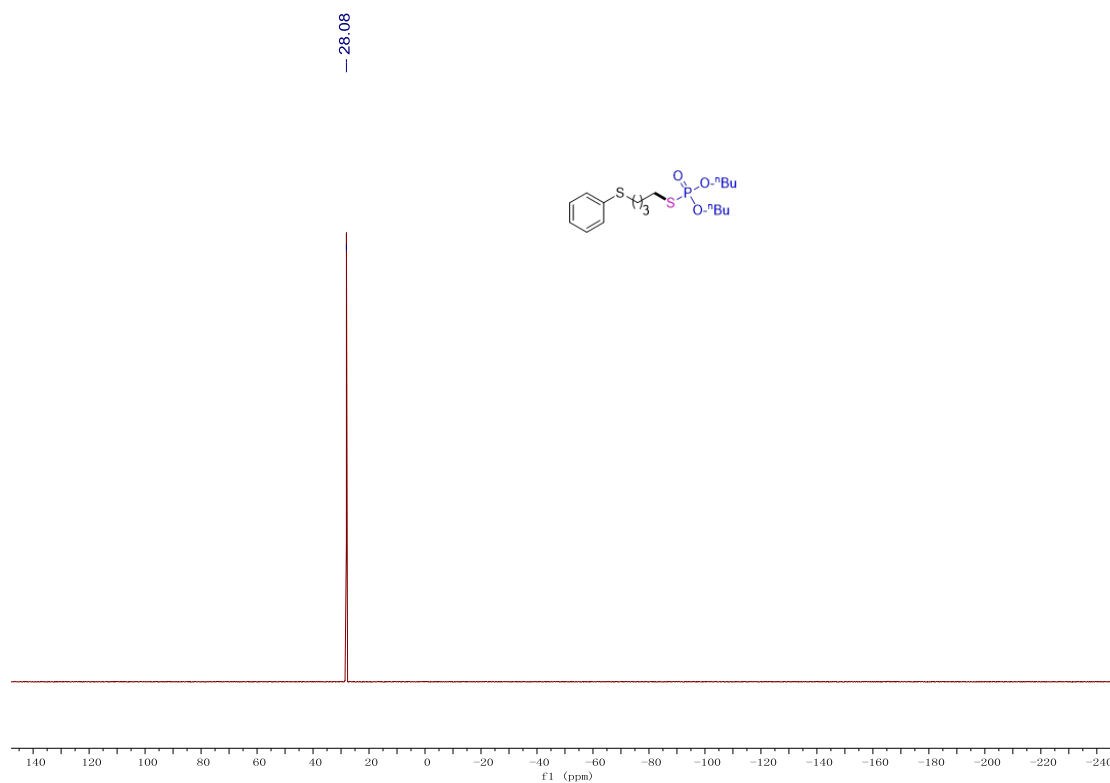

$^{31}\text{P}$  NMR (162 MHz,  $\text{CDCl}_3$ ) spectra of **5ac**

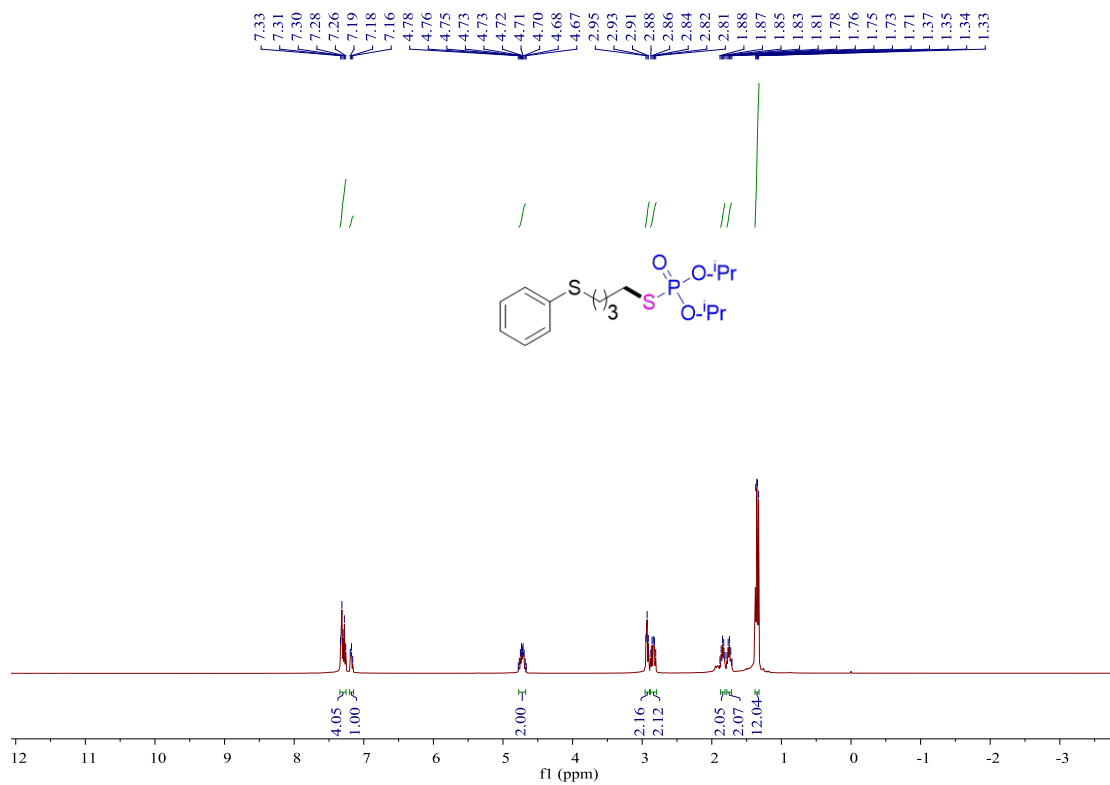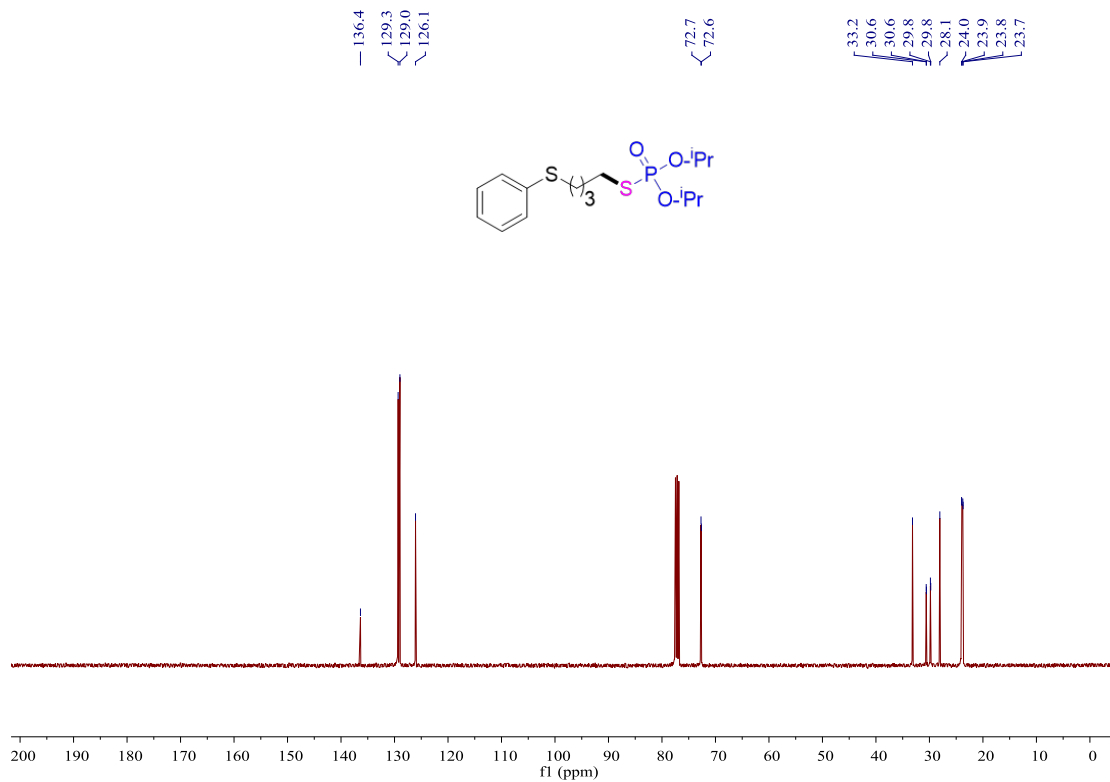

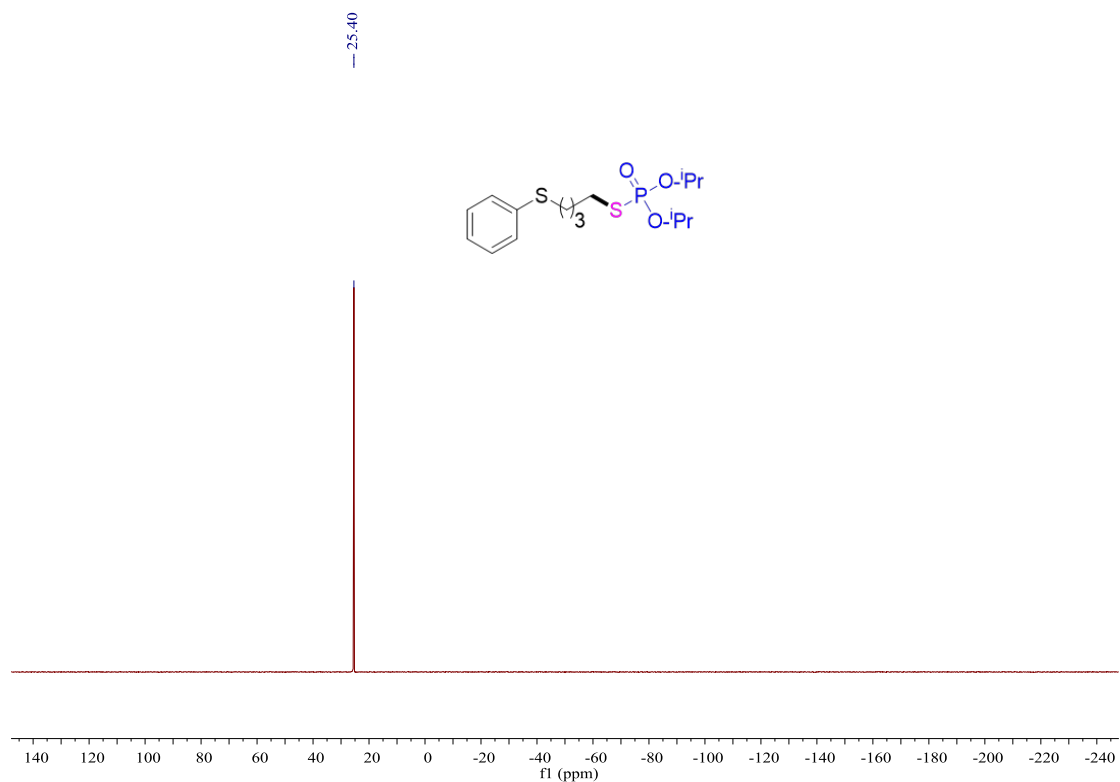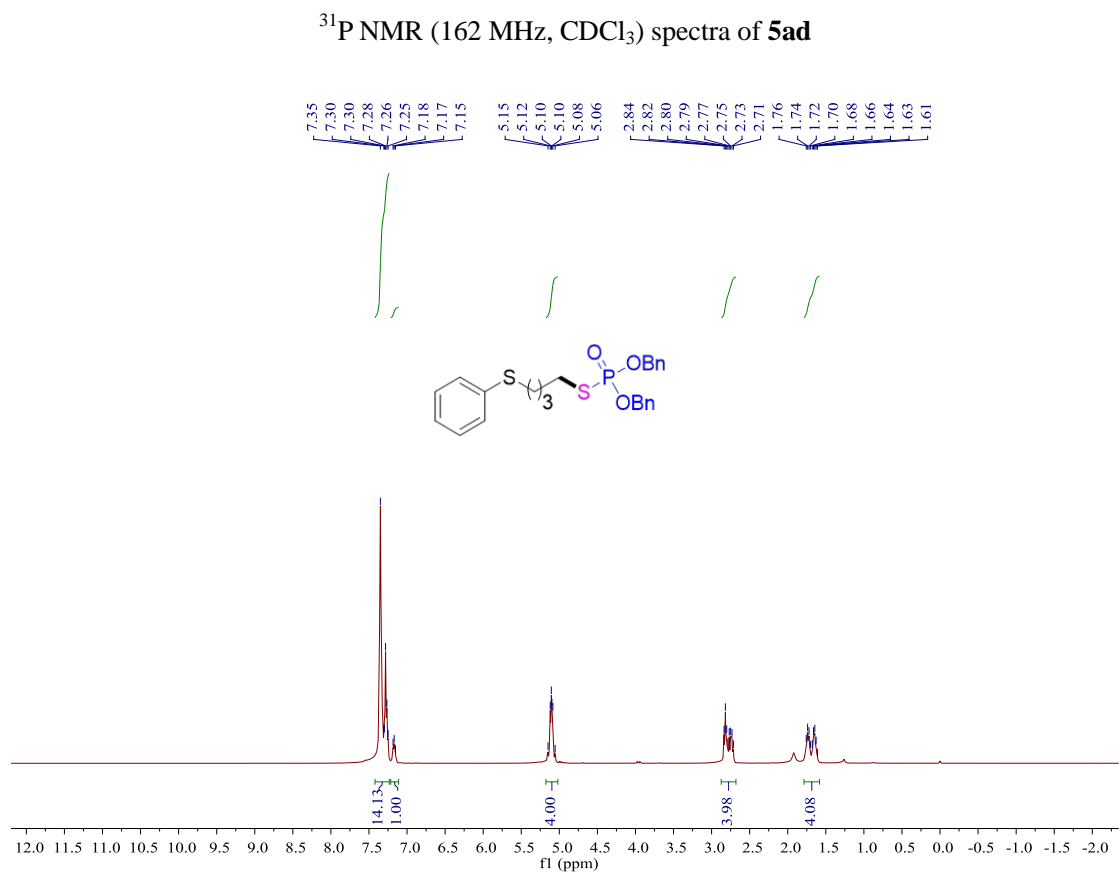

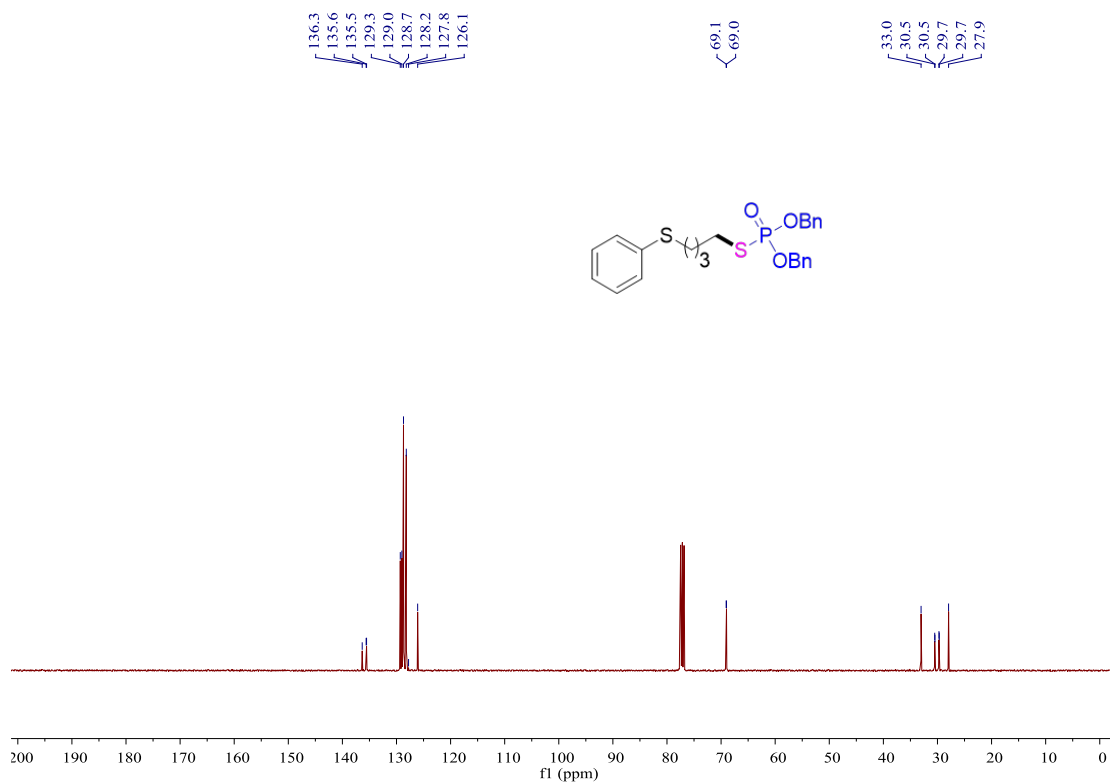

$^{13}\text{C}$  NMR (101 MHz,  $\text{CDCl}_3$ ) spectra of **5ae**

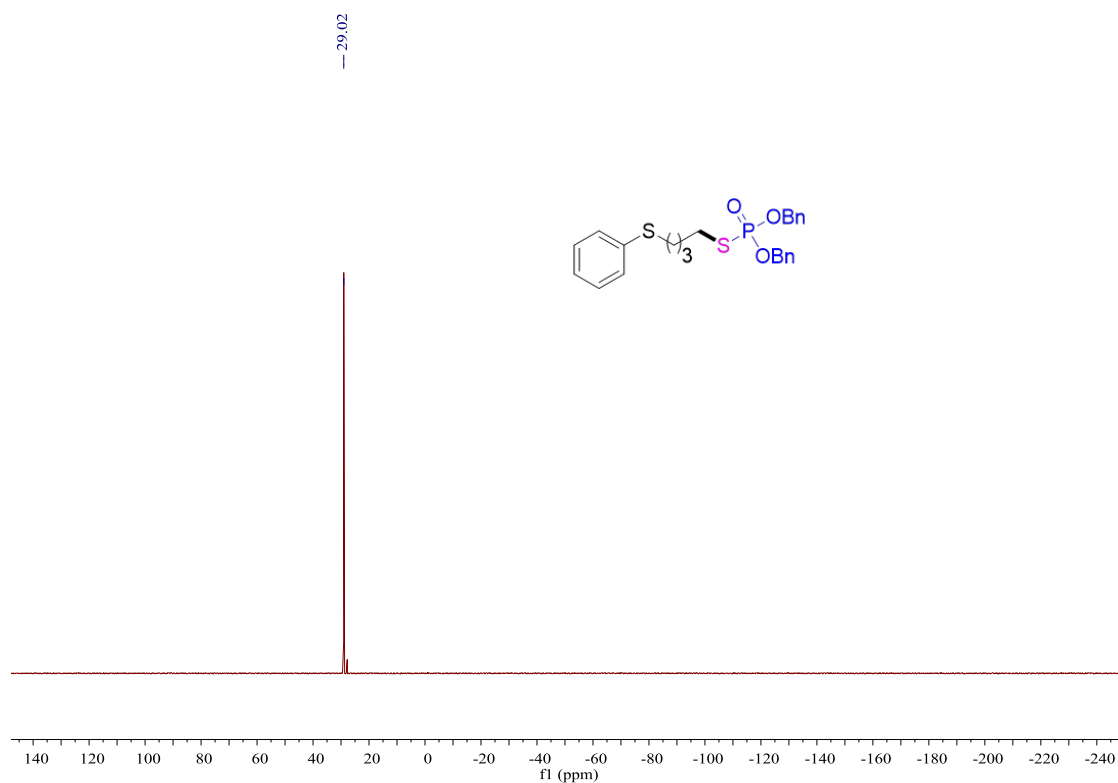

$^{31}\text{P}$  NMR (162 MHz,  $\text{CDCl}_3$ ) spectra of **5ae**

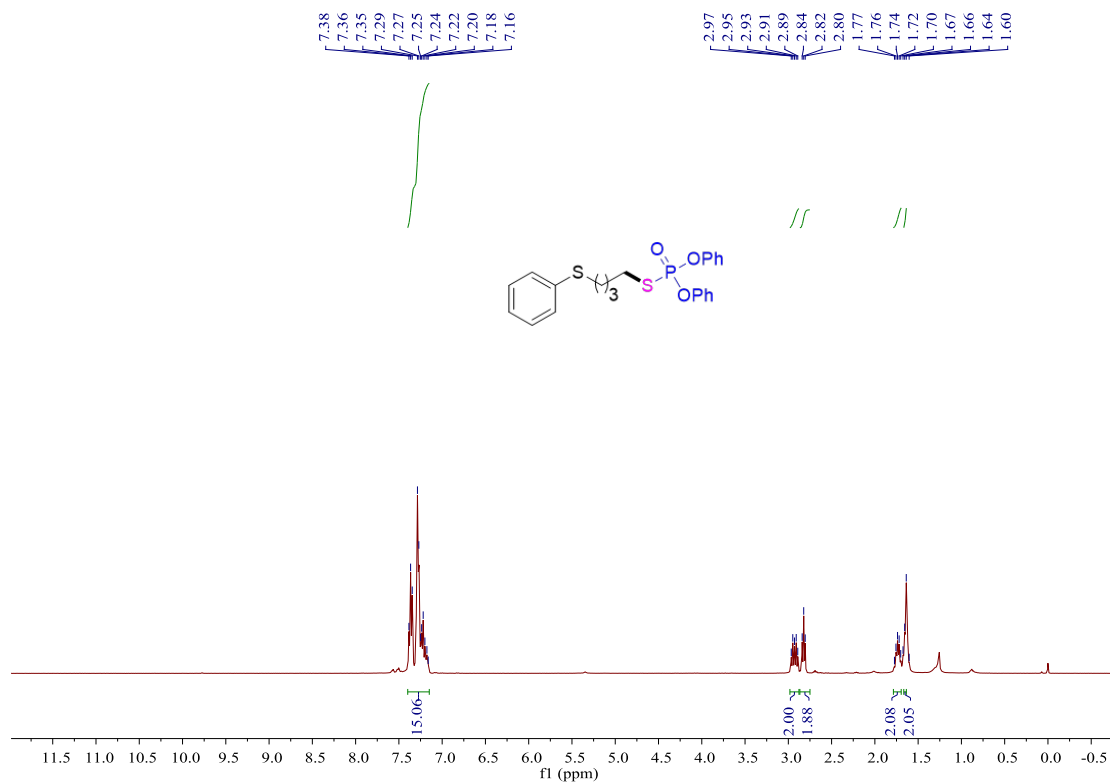

<sup>1</sup>H NMR (400 MHz, CDCl<sub>3</sub>) spectra of **5af**

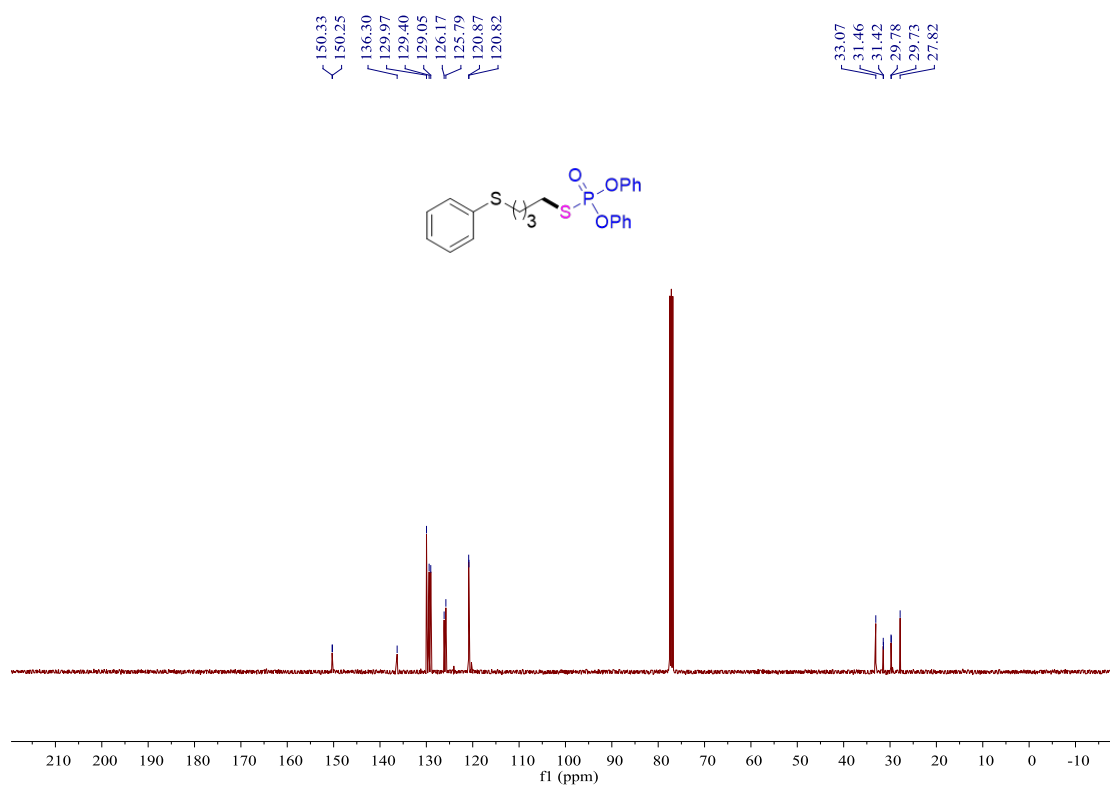

<sup>13</sup>C NMR (101 MHz, CDCl<sub>3</sub>) spectra of **5af**

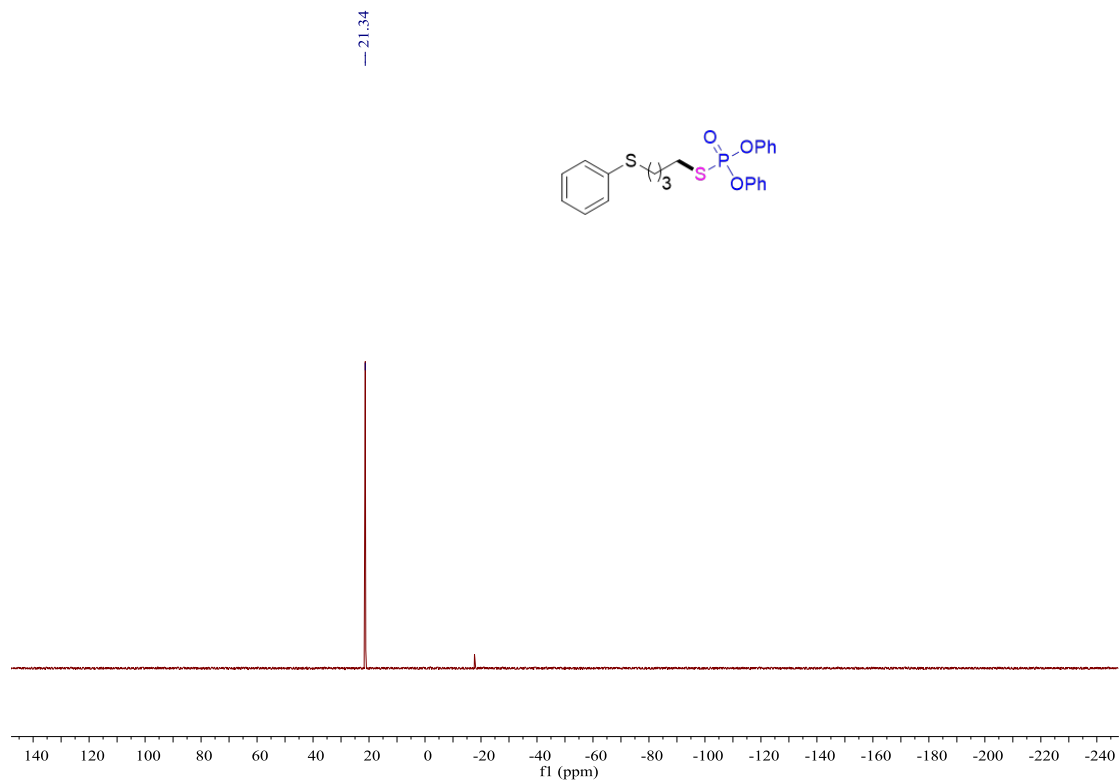

<sup>31</sup>P NMR (162 MHz, CDCl<sub>3</sub>) spectra of **5af**

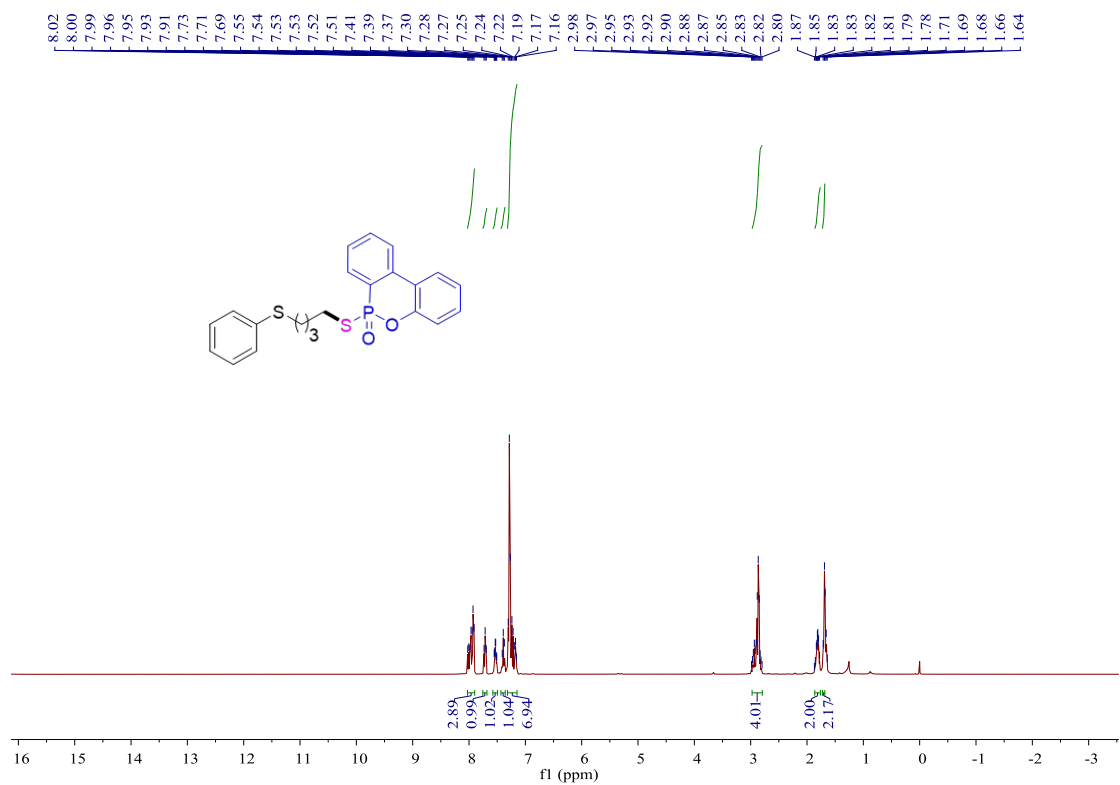

<sup>1</sup>H NMR (400 MHz, CDCl<sub>3</sub>) spectra of **5ag**

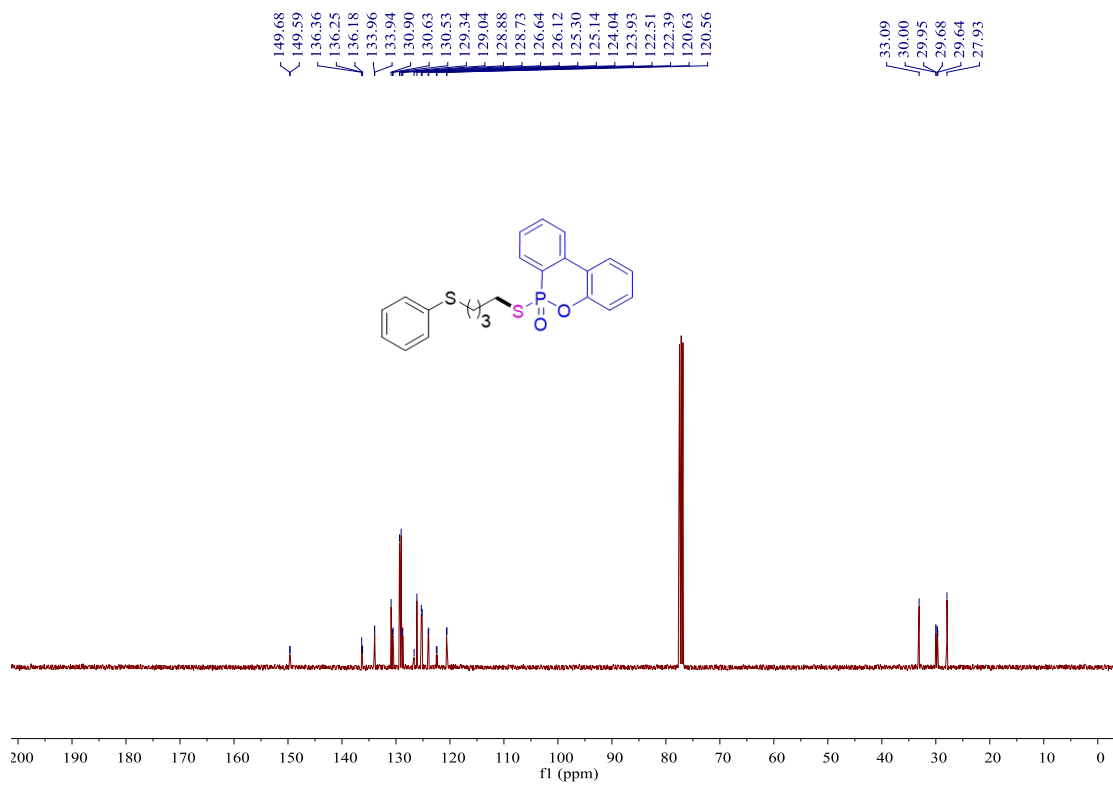

<sup>13</sup>C NMR (101 MHz, CDCl<sub>3</sub>) spectra of **5ag**

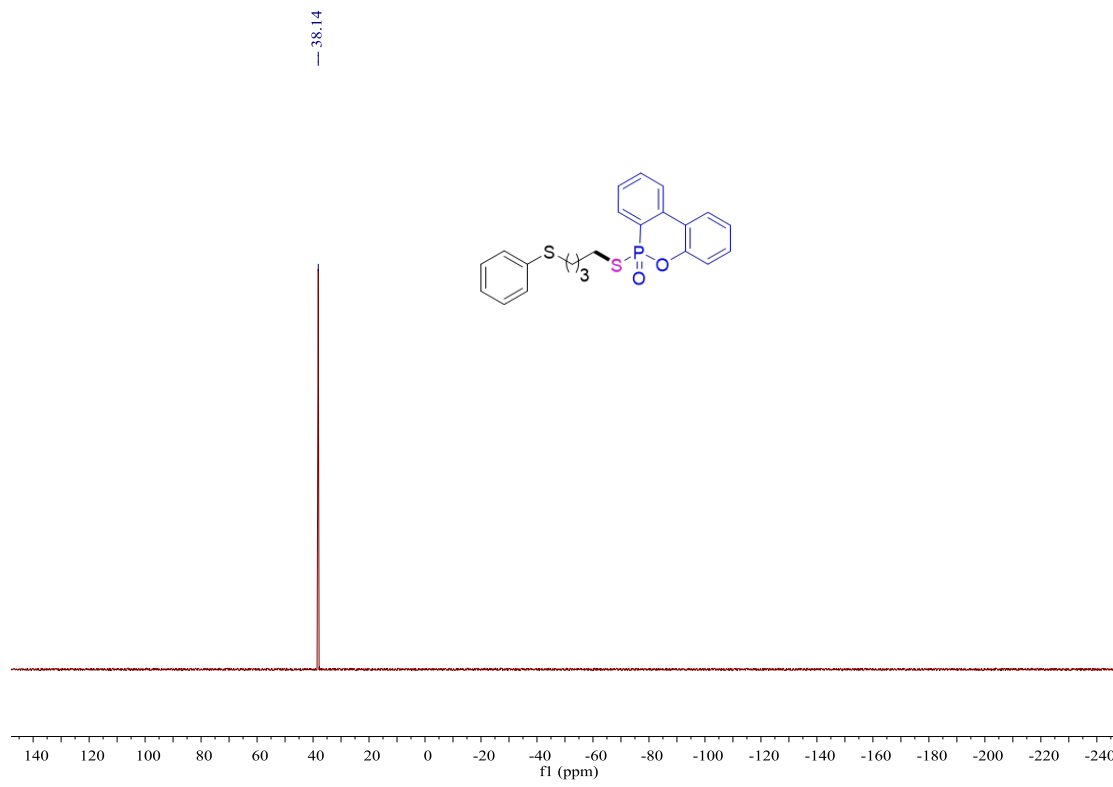

<sup>31</sup>P NMR (162 MHz, CDCl<sub>3</sub>) spectra of **5ag**

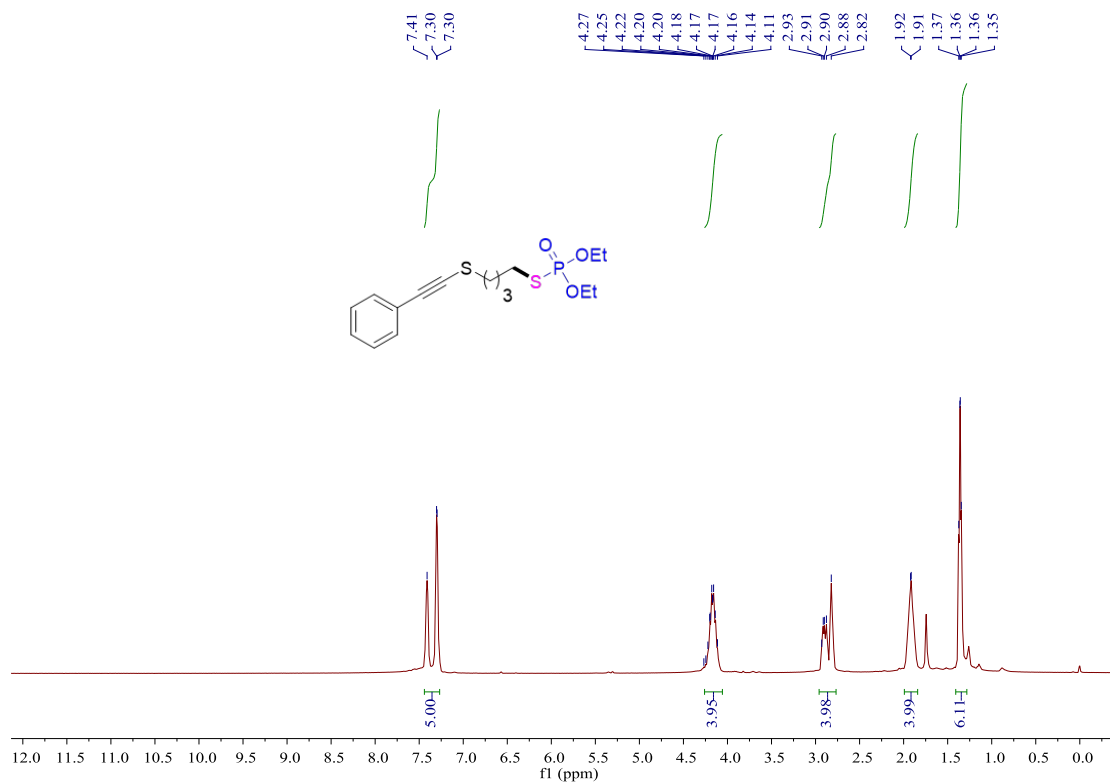

<sup>1</sup>H NMR (400 MHz, CDCl<sub>3</sub>) spectra of **7aa**

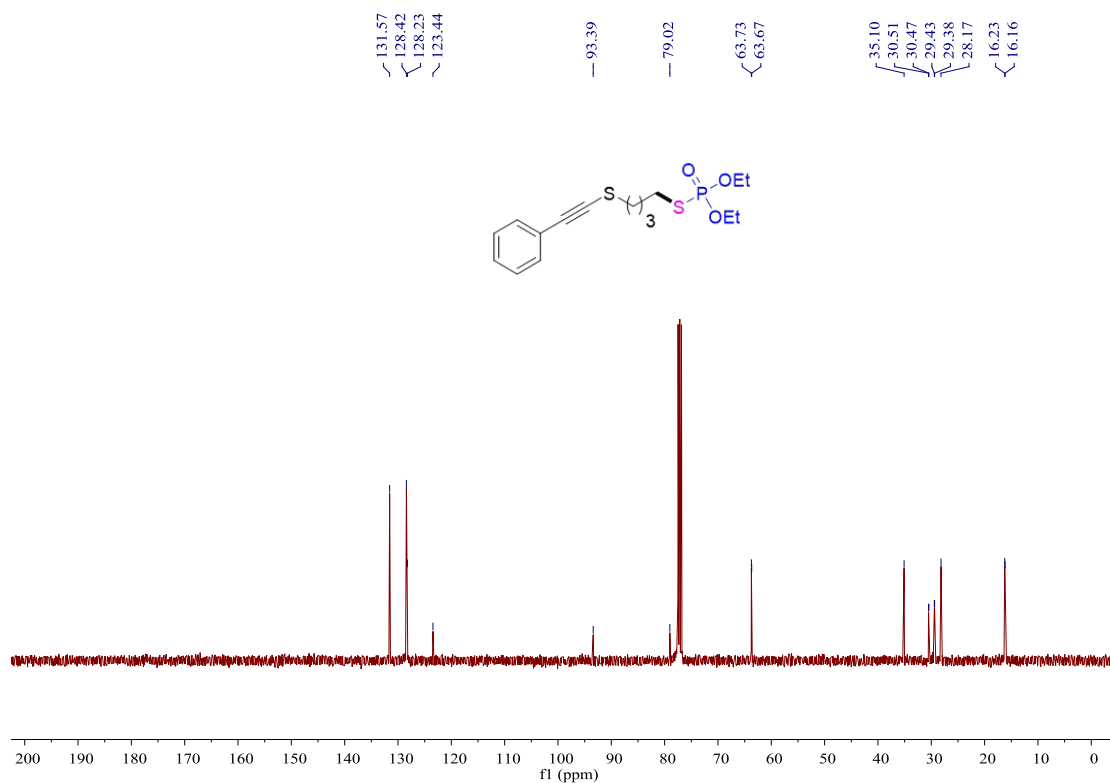

<sup>13</sup>C NMR (101 MHz, CDCl<sub>3</sub>) spectra of **7aa**



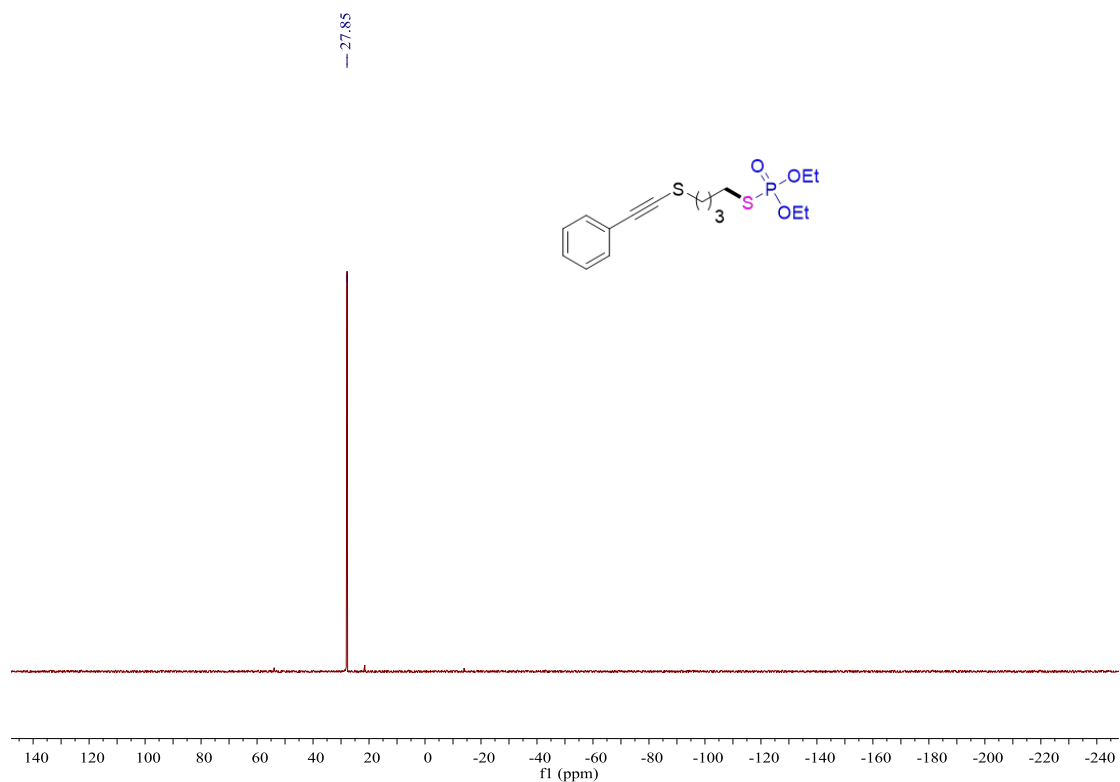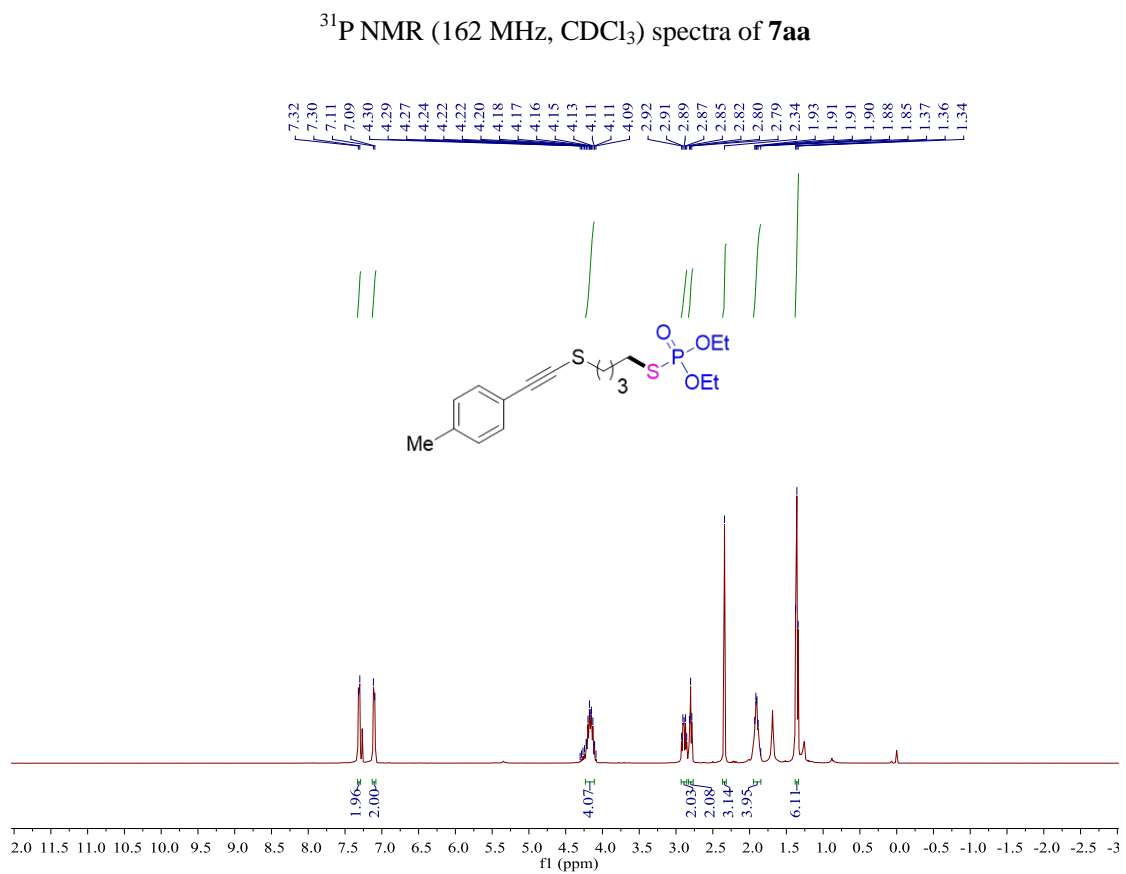

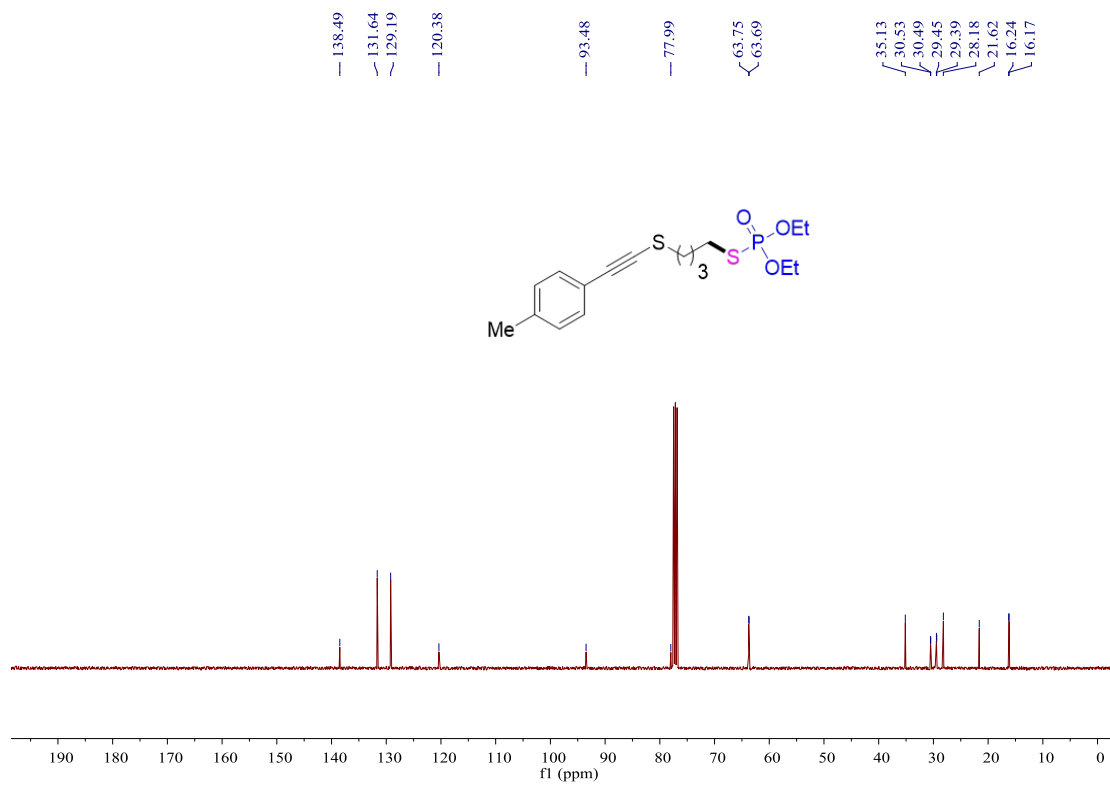

$^{13}\text{C}$  NMR (101 MHz,  $\text{CDCl}_3$ ) spectra of **7ba**

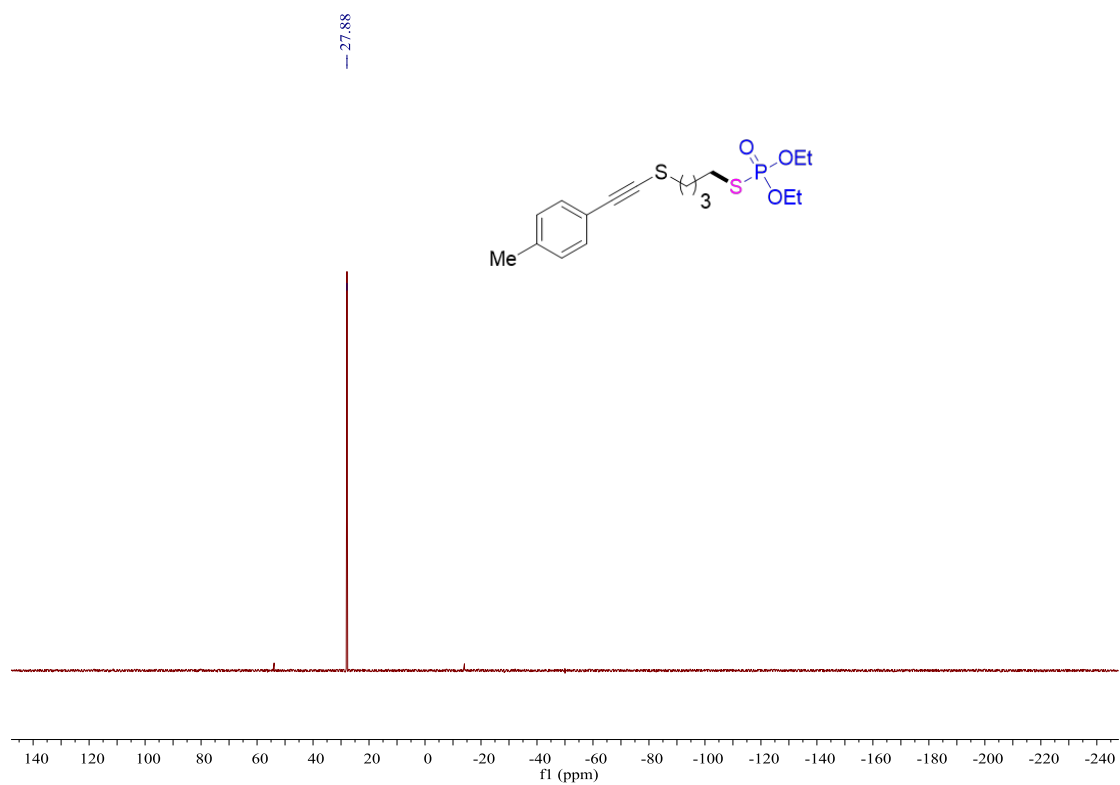

$^{31}\text{P}$  NMR (162 MHz,  $\text{CDCl}_3$ ) spectra of **7ba**

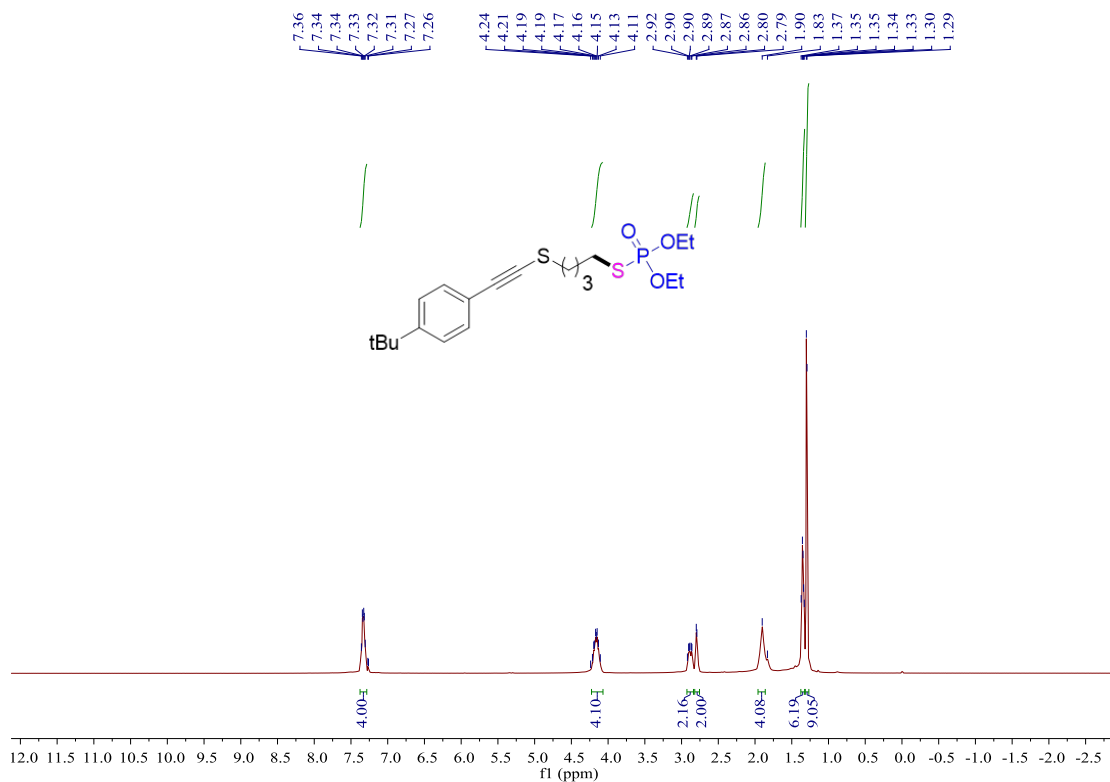

<sup>1</sup>H NMR (400 MHz, CDCl<sub>3</sub>) spectra of **7ca**

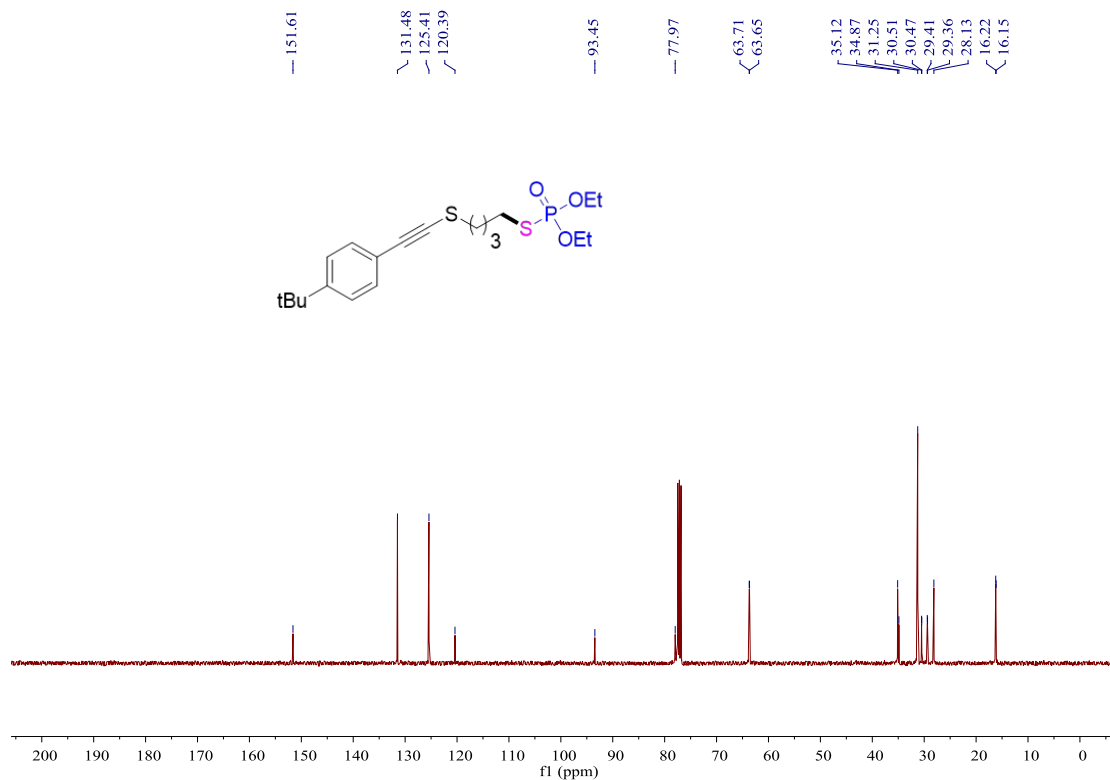

<sup>13</sup>C NMR (101 MHz, CDCl<sub>3</sub>) spectra of **7ca**

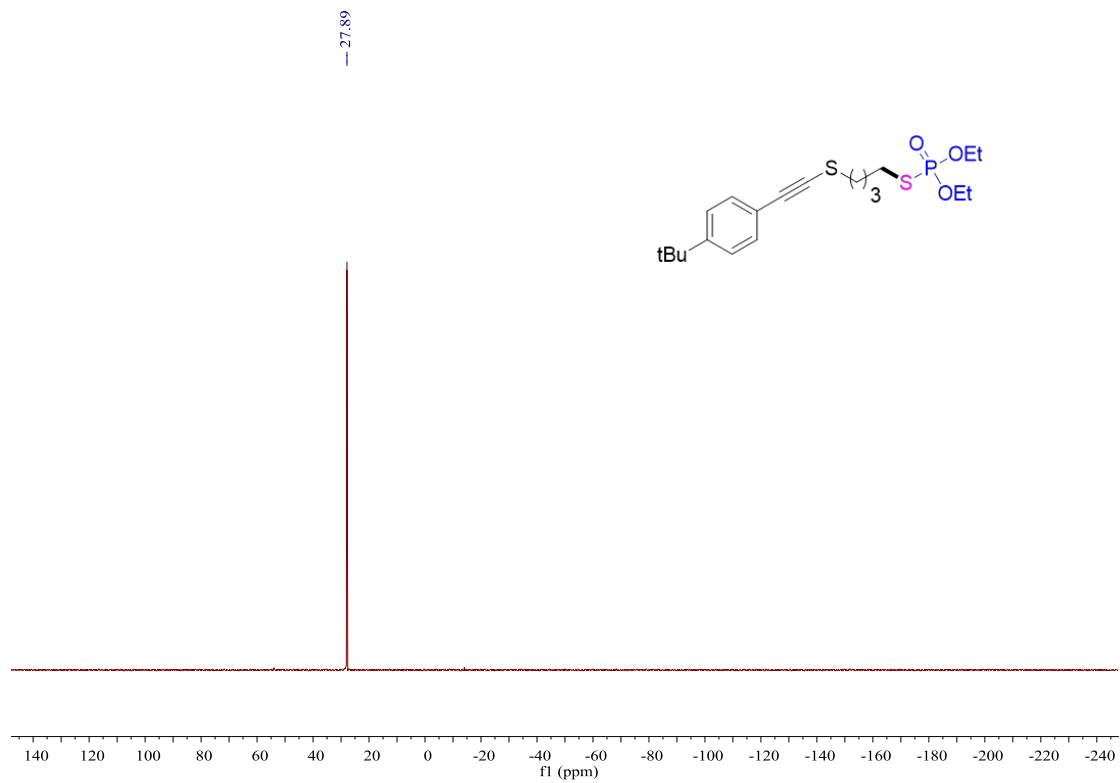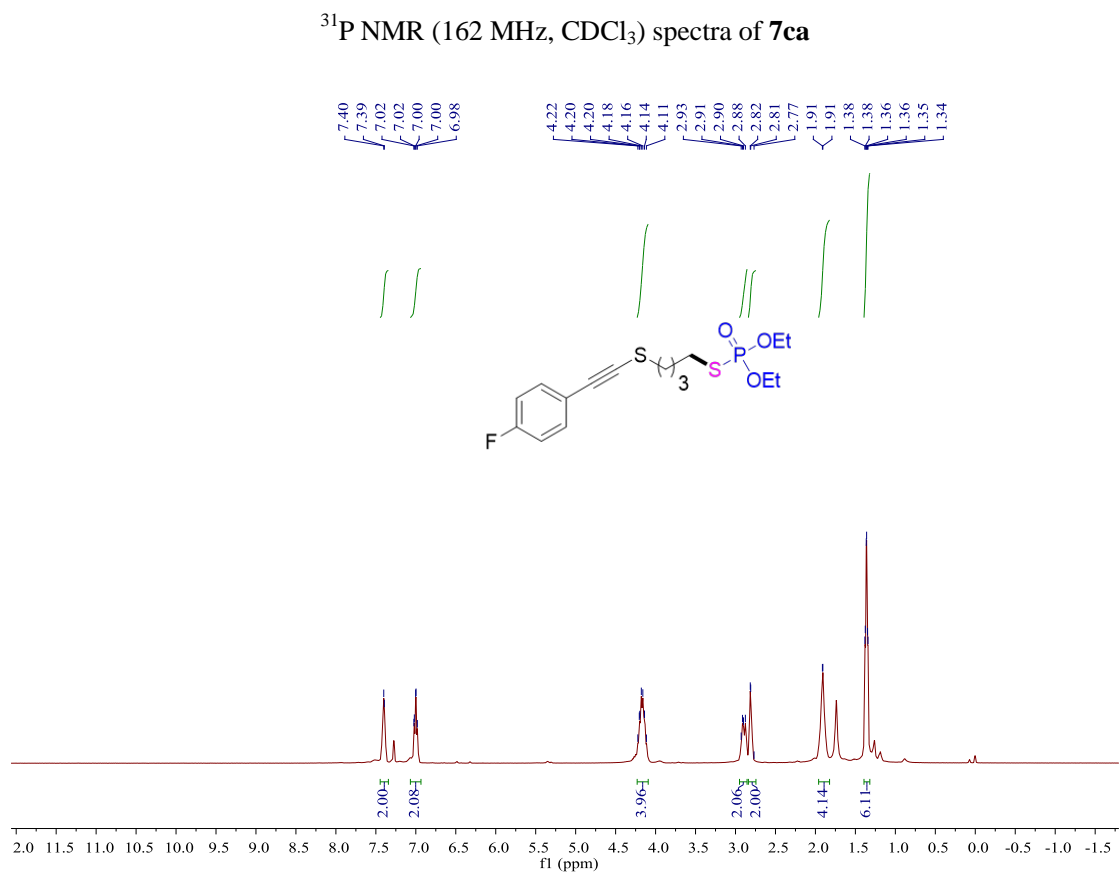

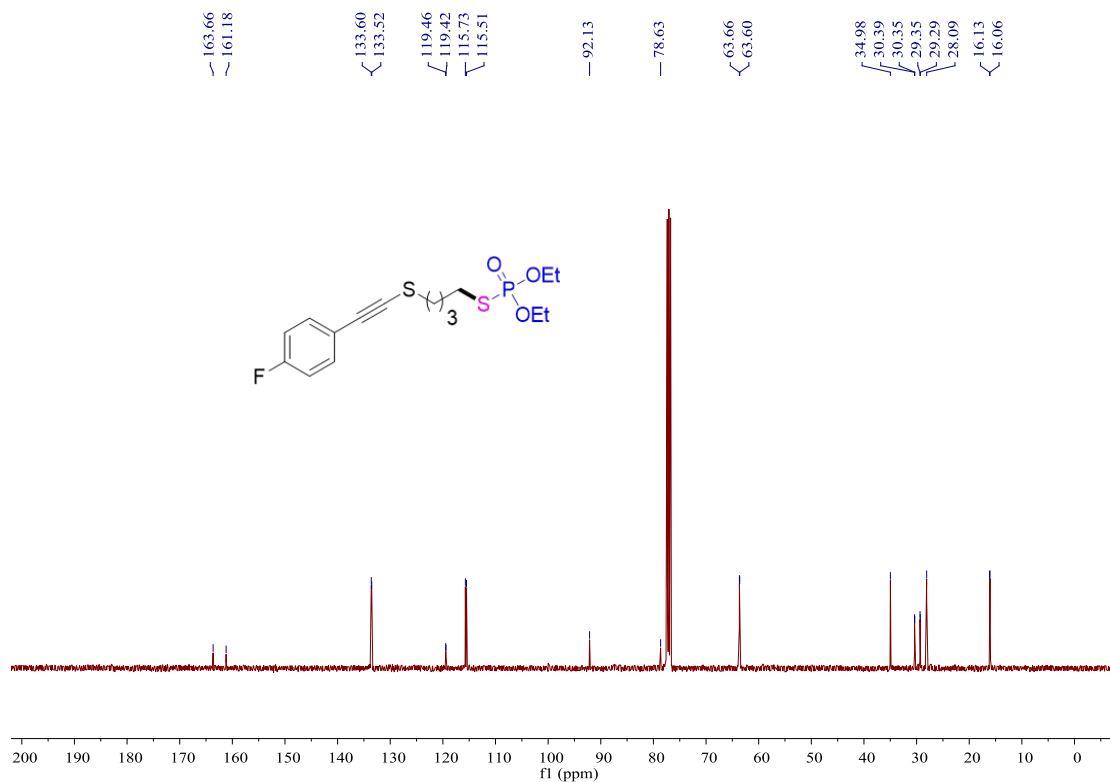

$^{13}\text{C}$  NMR (101 MHz,  $\text{CDCl}_3$ ) spectra of **7da**

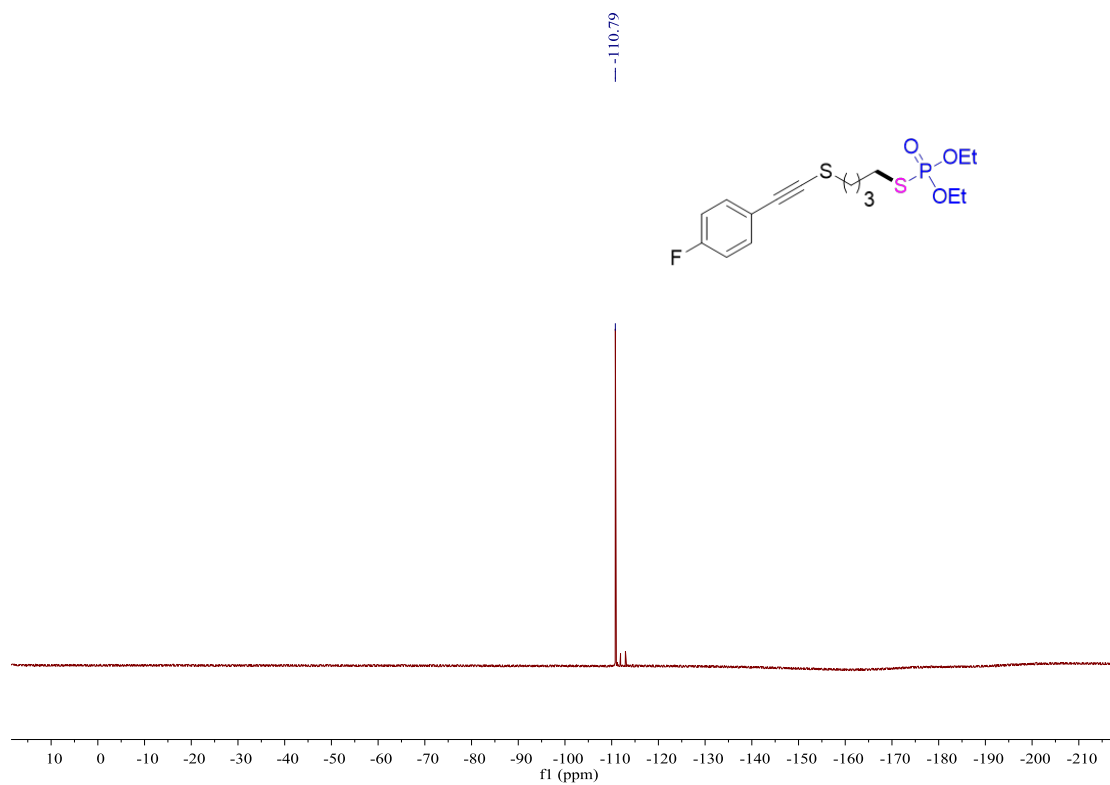

$^{31}\text{P}$  NMR (162 MHz,  $\text{CDCl}_3$ ) spectra of **7da**

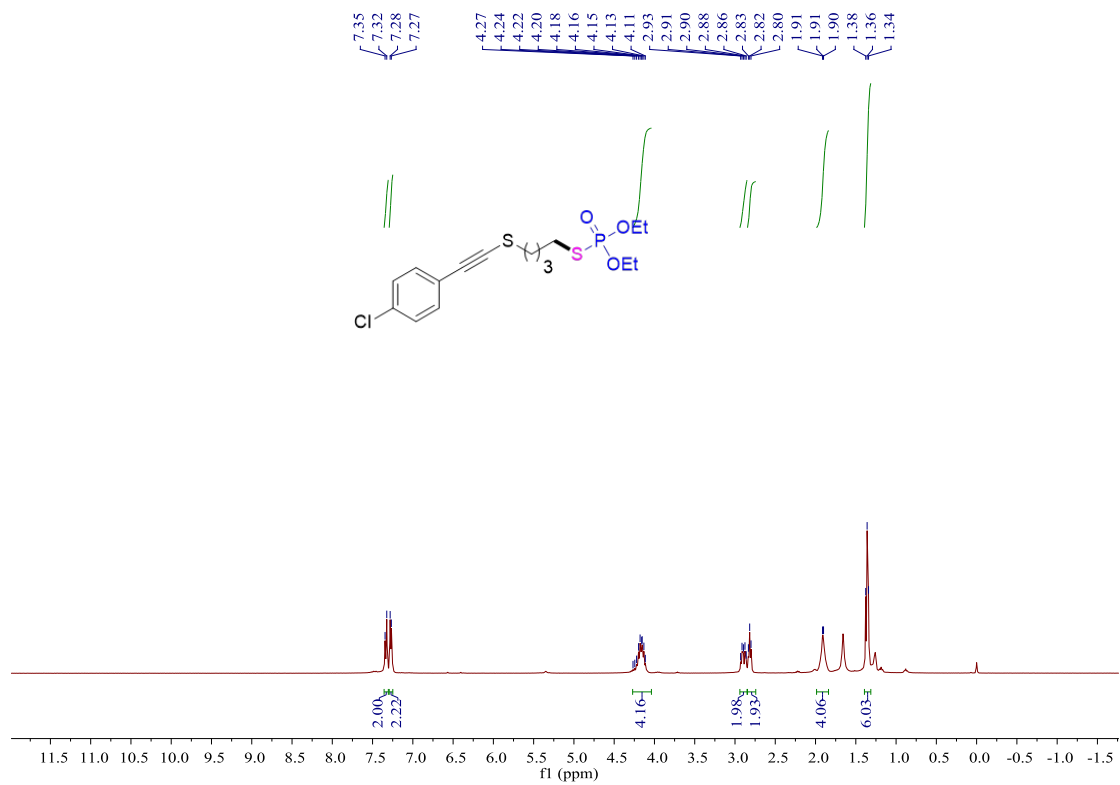

<sup>1</sup>H NMR (400 MHz, CDCl<sub>3</sub>) spectra of **7ea**

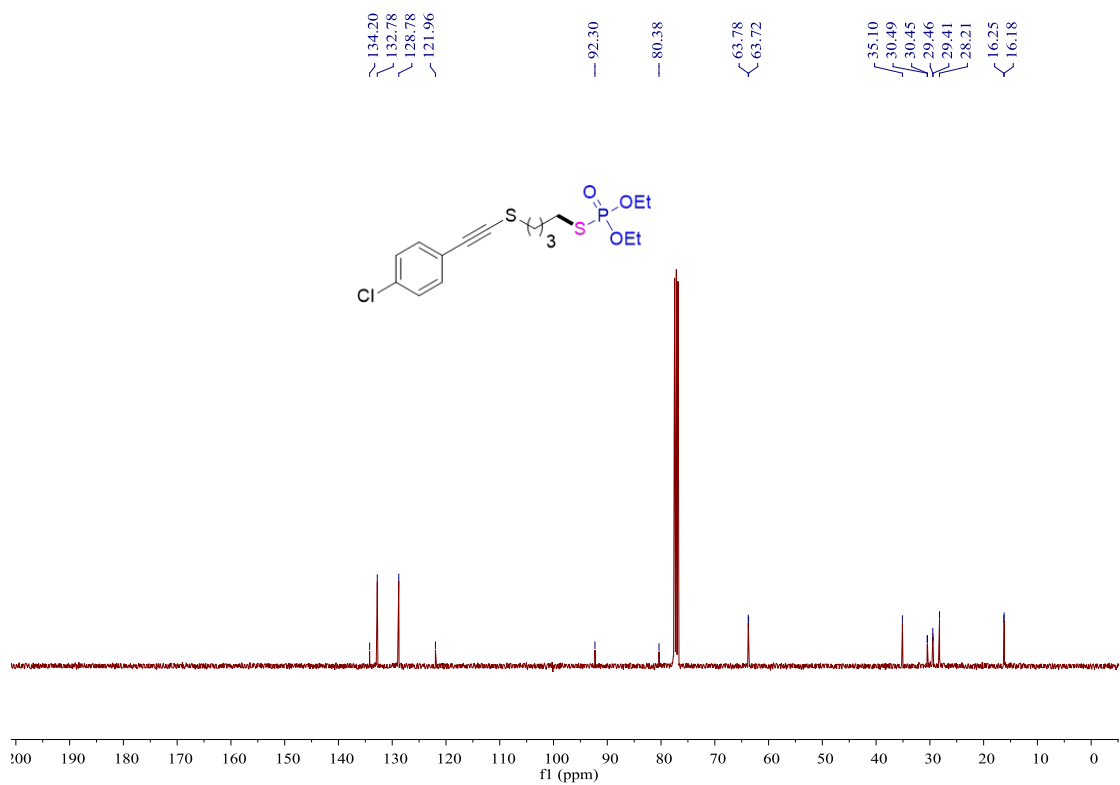

<sup>13</sup>C NMR (101 MHz, CDCl<sub>3</sub>) spectra of **7ea**

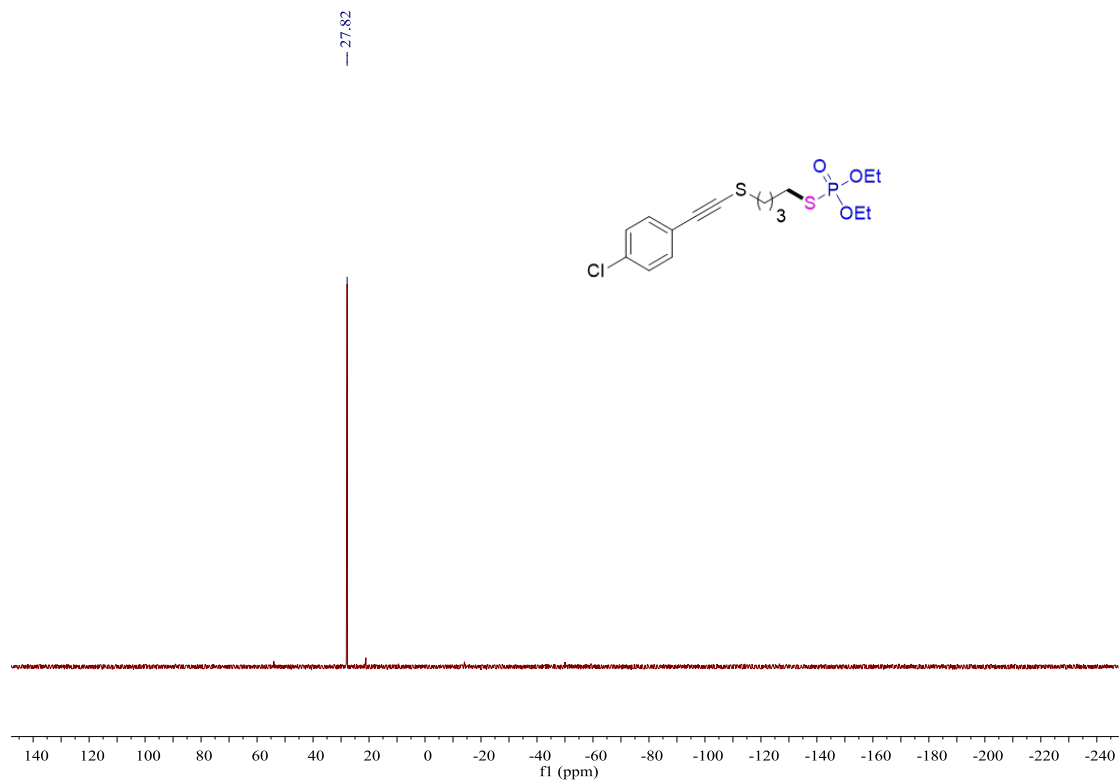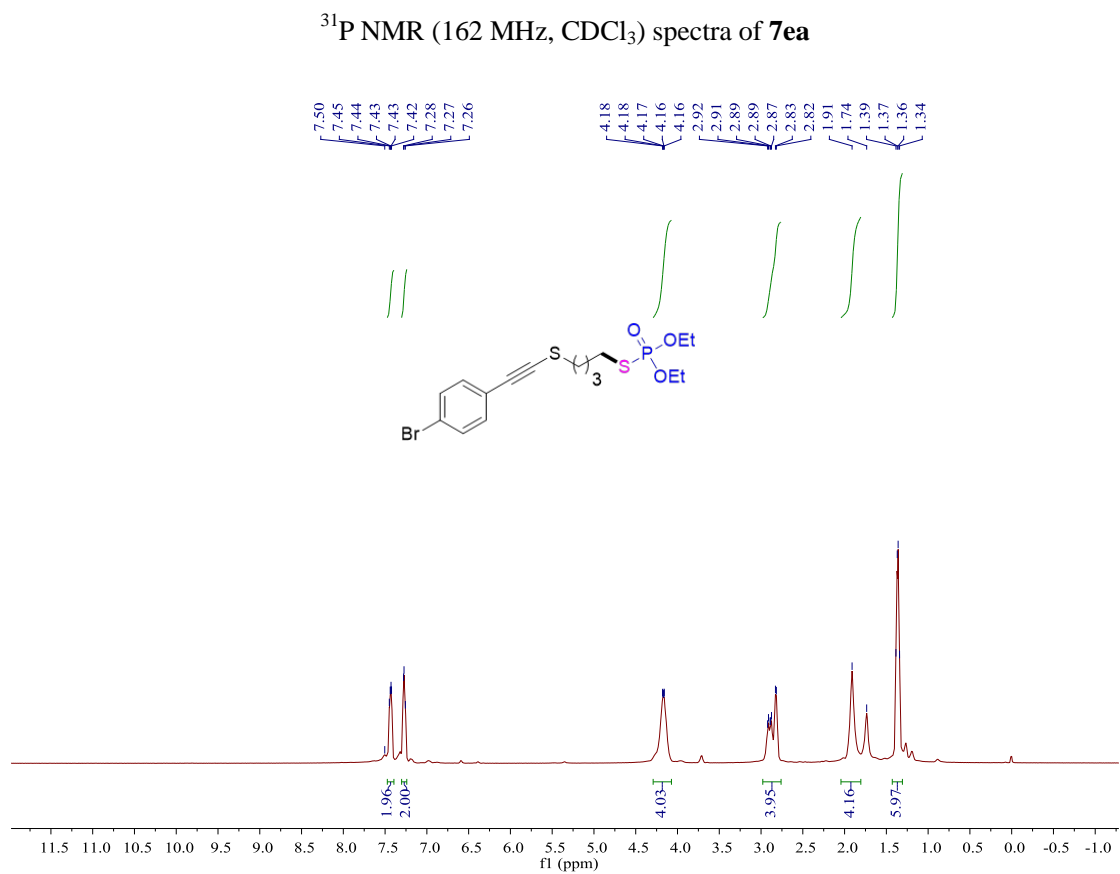

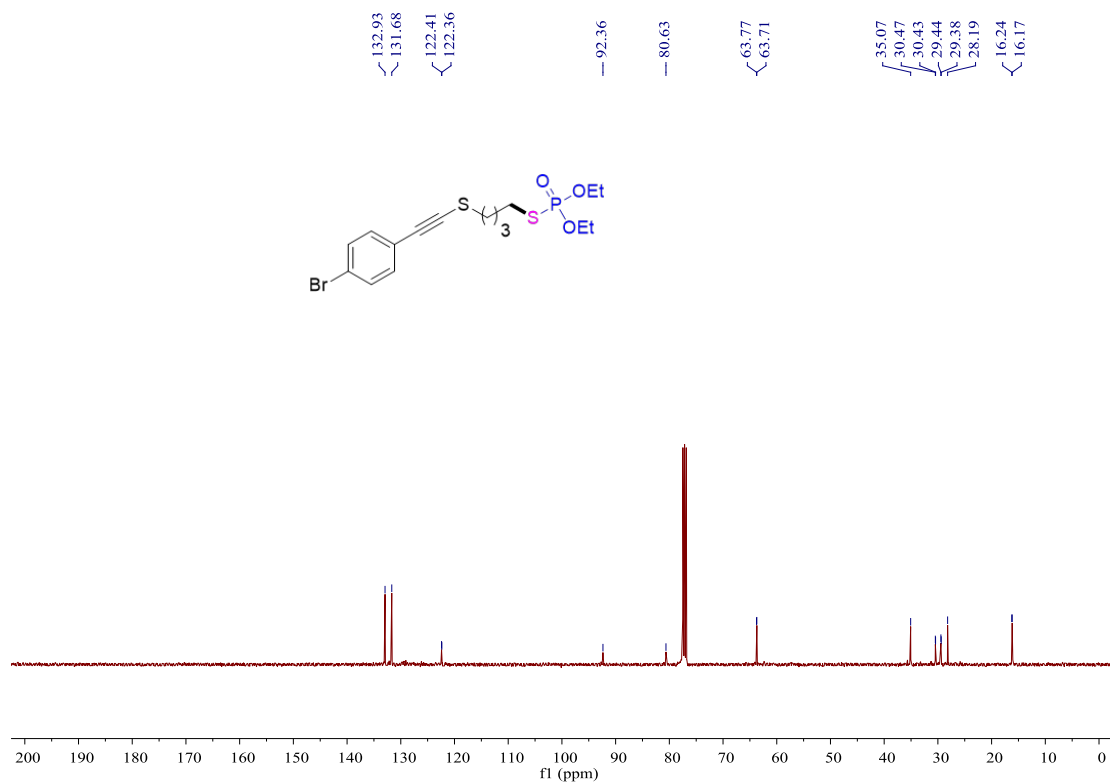

$^{13}\text{C}$  NMR (101 MHz,  $\text{CDCl}_3$ ) spectra of **7fa**

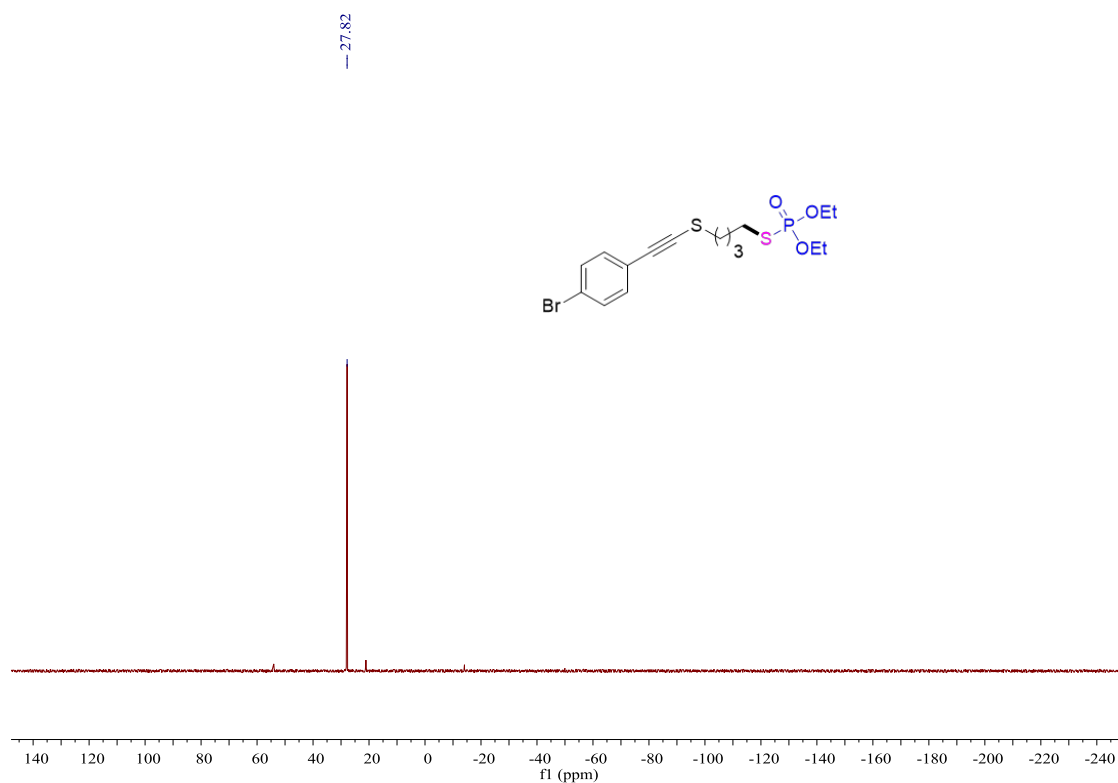

$^{31}\text{P}$  NMR (162 MHz,  $\text{CDCl}_3$ ) spectra of **7fa**



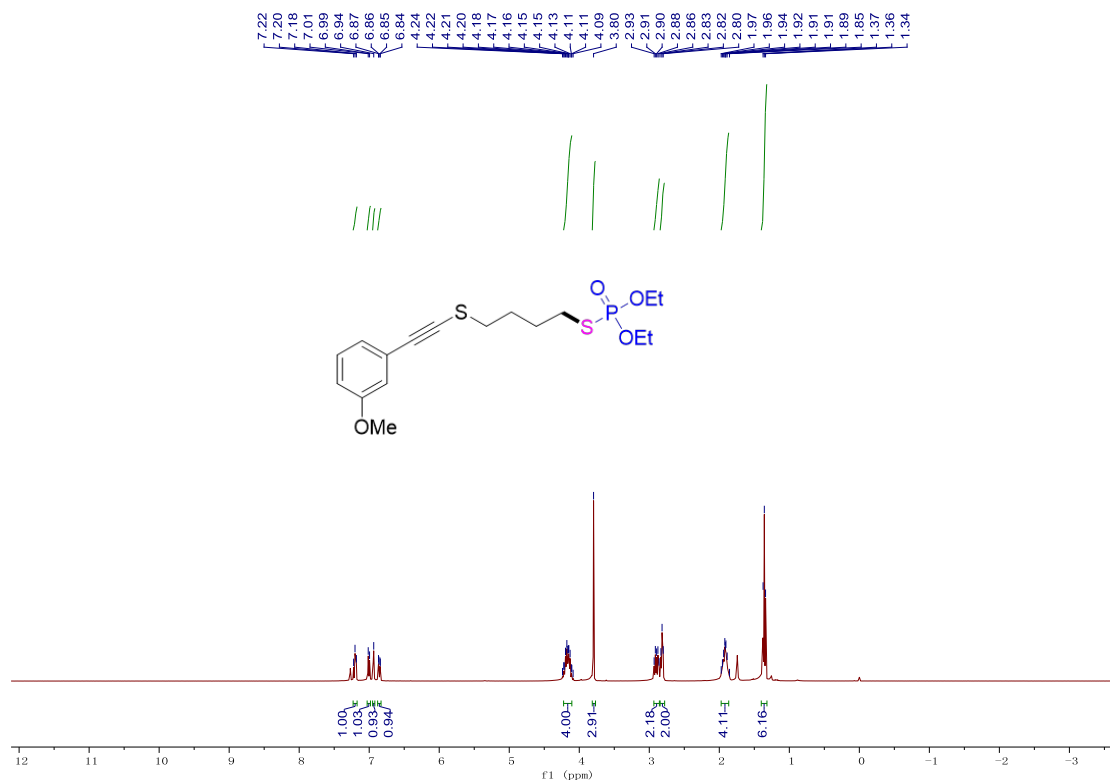

<sup>1</sup>H NMR (400 MHz, CDCl<sub>3</sub>) spectra of **7ga**

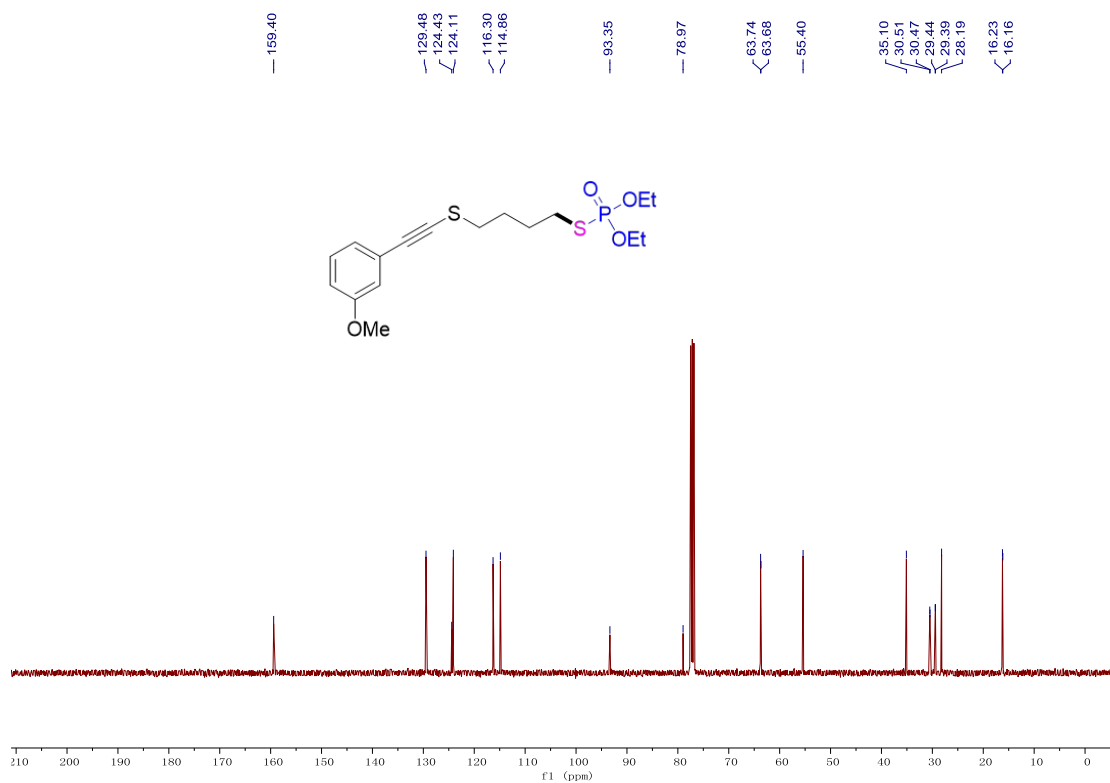

<sup>13</sup>C NMR (101 MHz, CDCl<sub>3</sub>) spectra of **7ga**

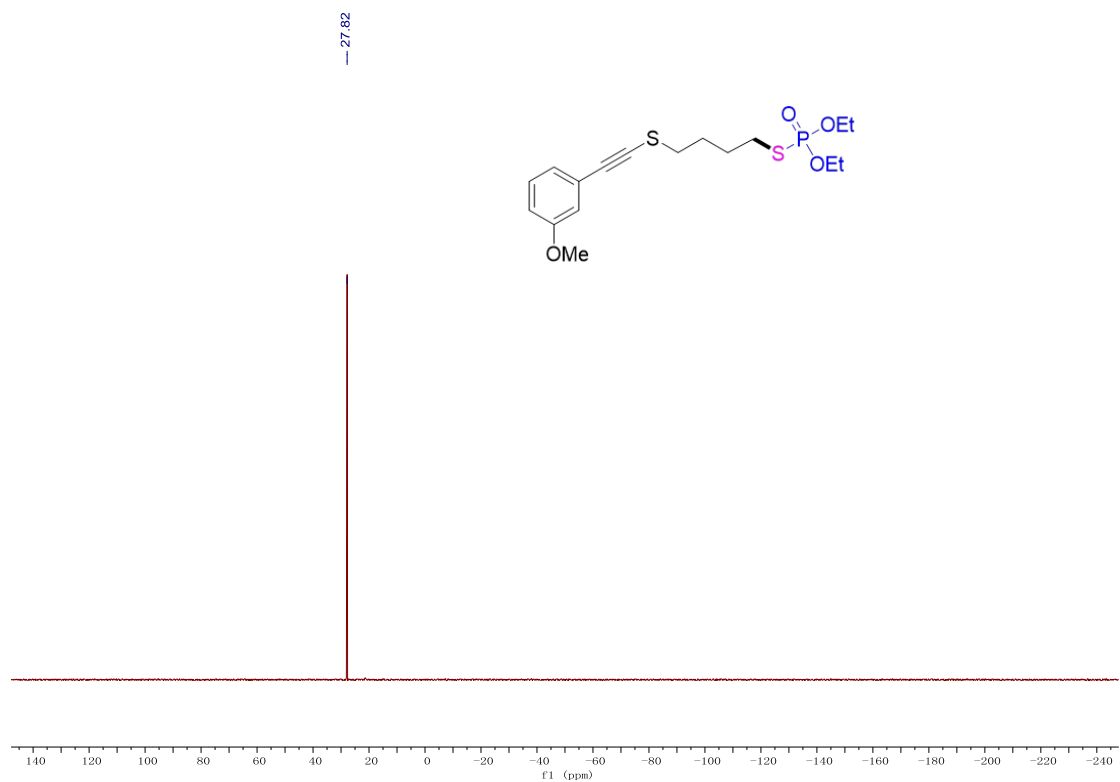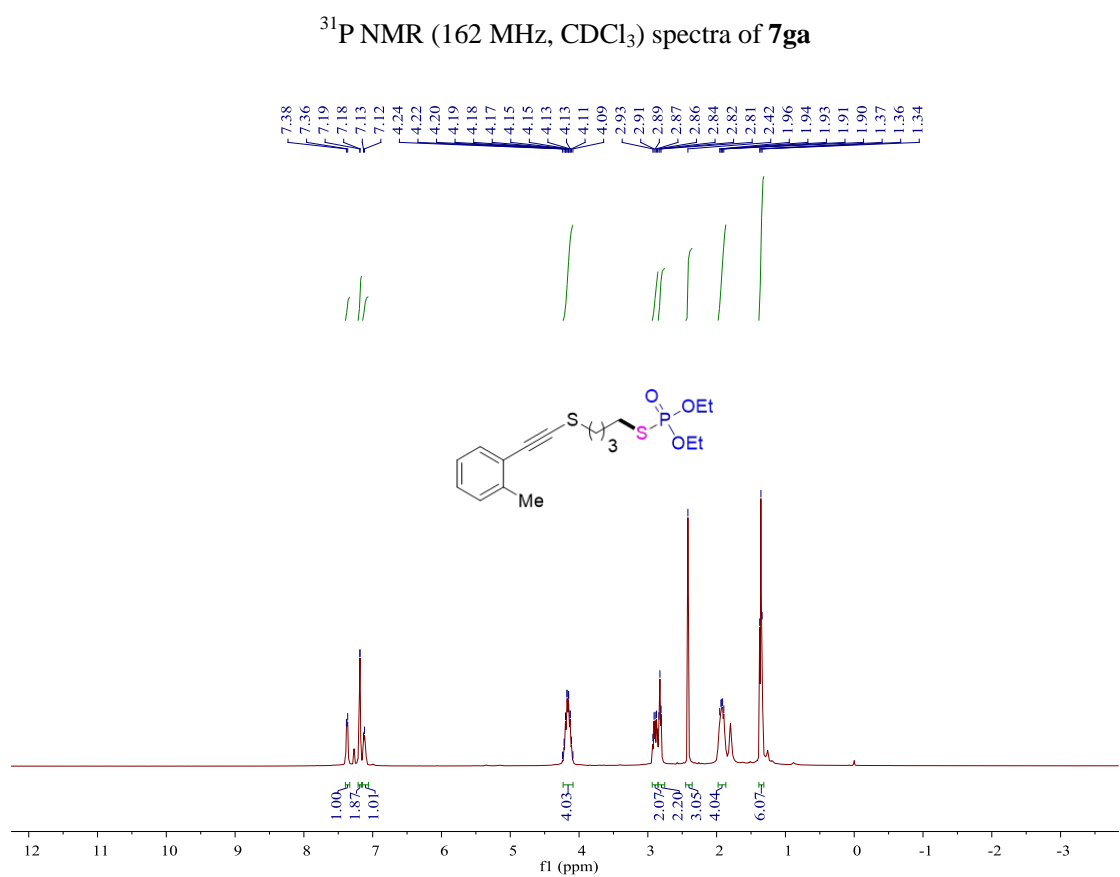

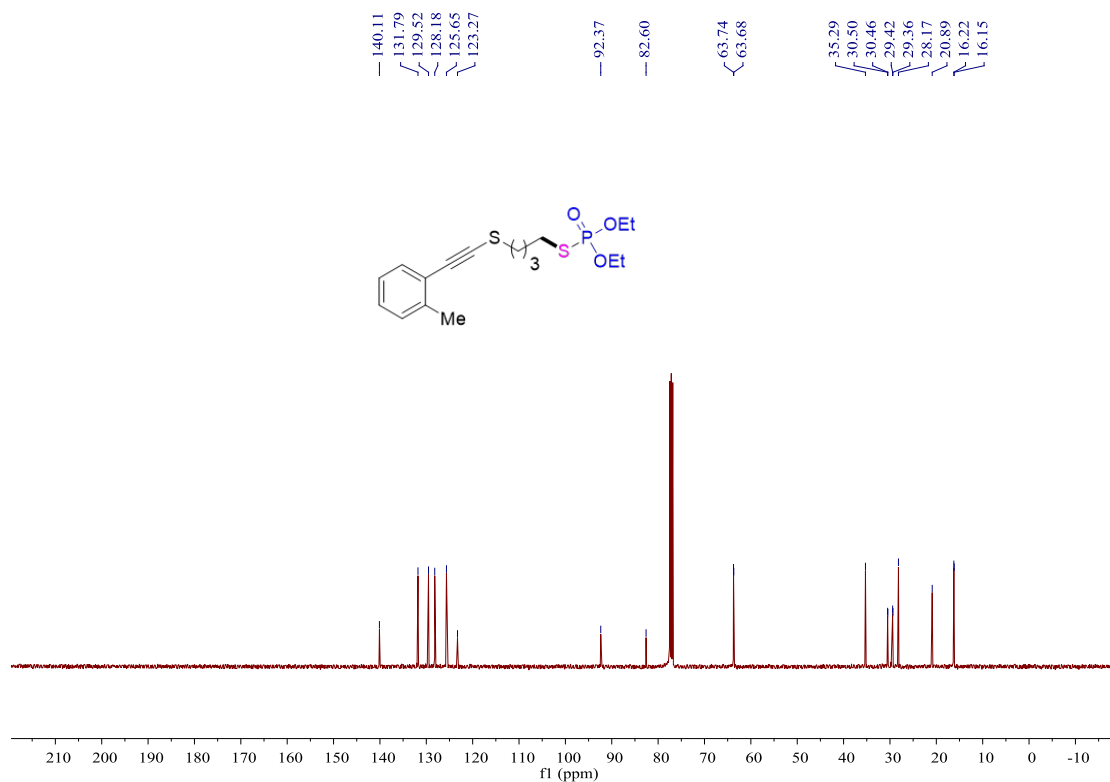

<sup>13</sup>C NMR (101 MHz, CDCl<sub>3</sub>) spectra of **7ha**

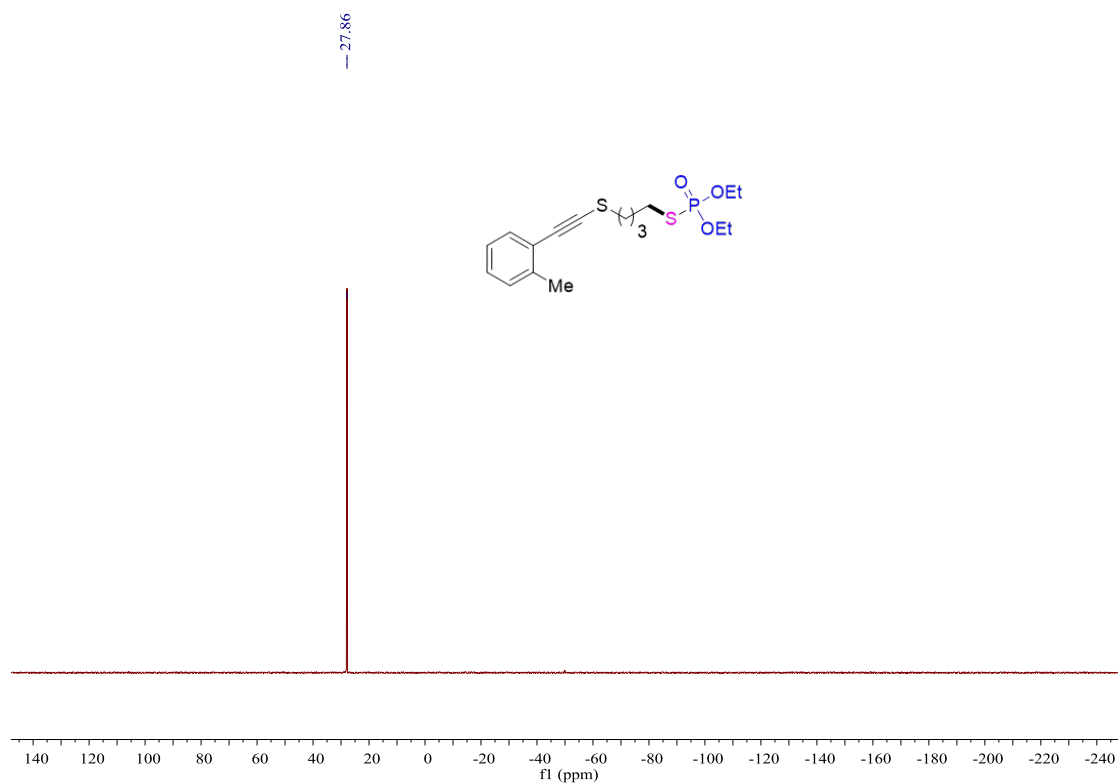

<sup>31</sup>P NMR (162 MHz, CDCl<sub>3</sub>) spectra of **7ha**

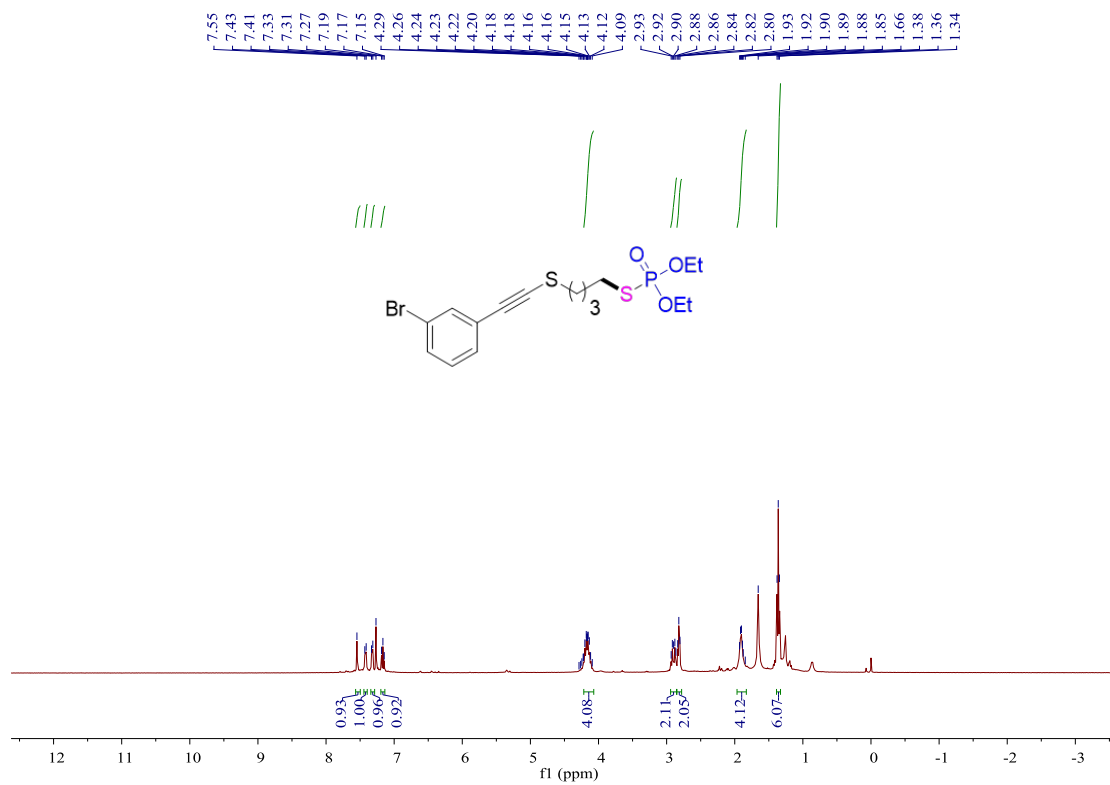

<sup>1</sup>H NMR (400 MHz, CDCl<sub>3</sub>) spectra of **7ia**

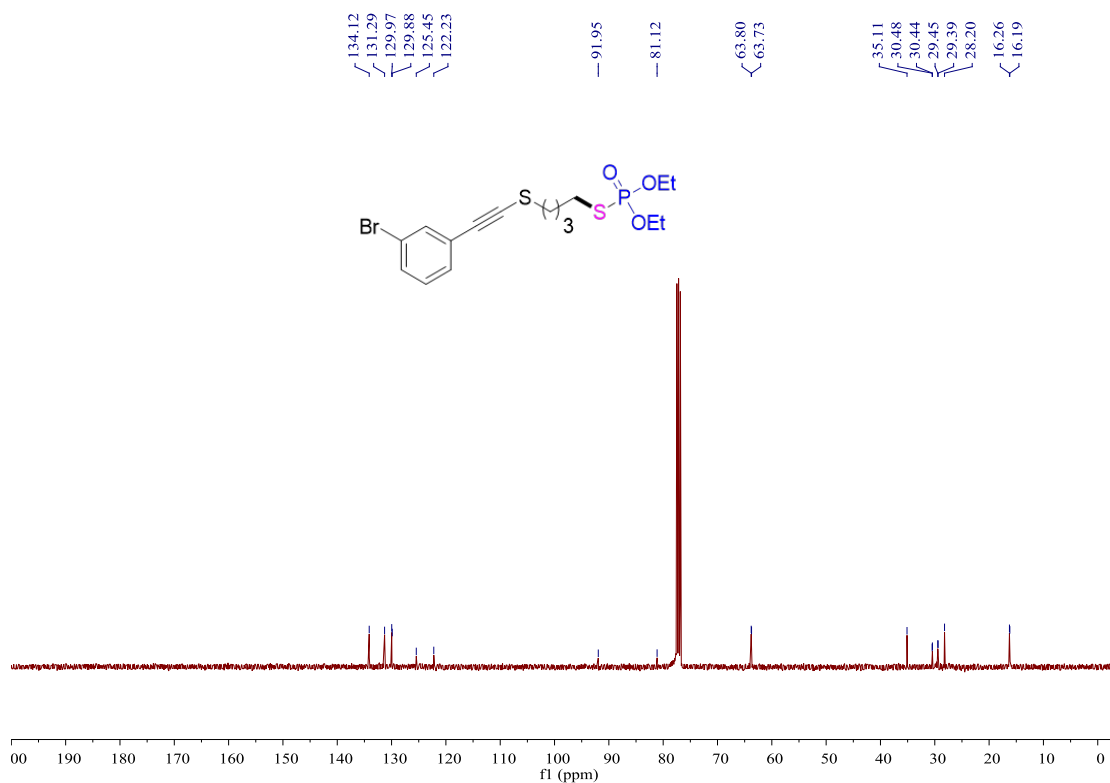

<sup>13</sup>C NMR (101 MHz, CDCl<sub>3</sub>) spectra of **7ia**

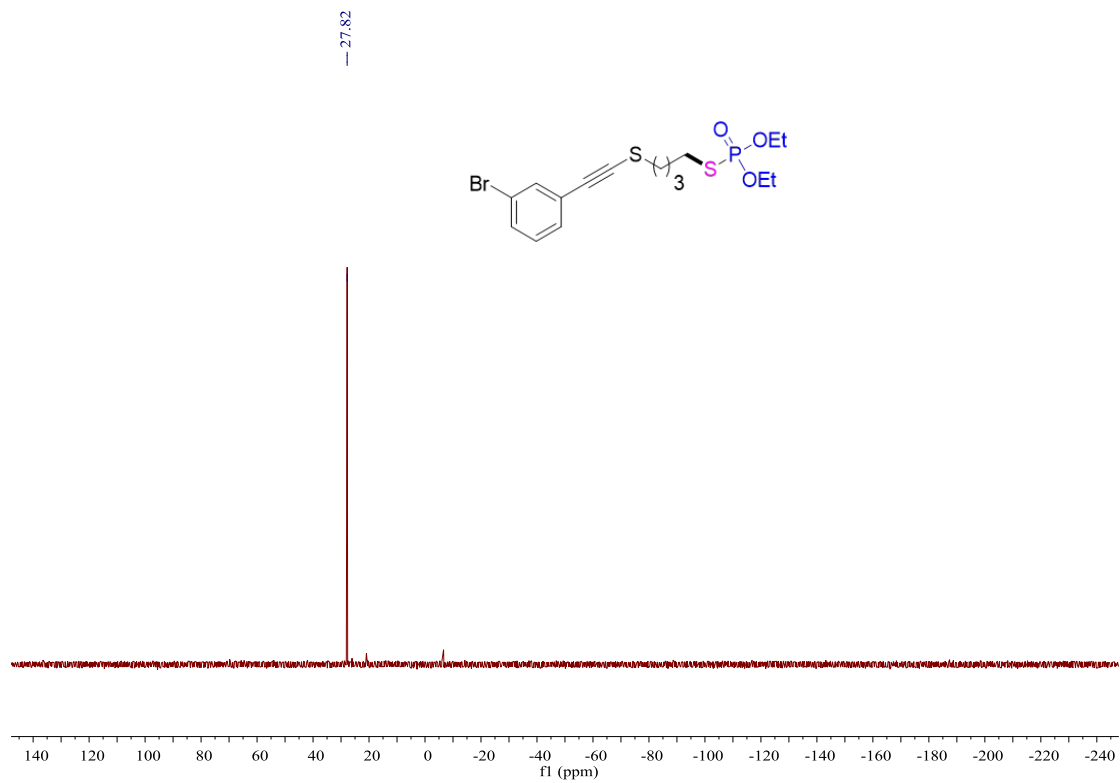

$^{31}\text{P}$  NMR (162 MHz,  $\text{CDCl}_3$ ) spectra of **7ia**

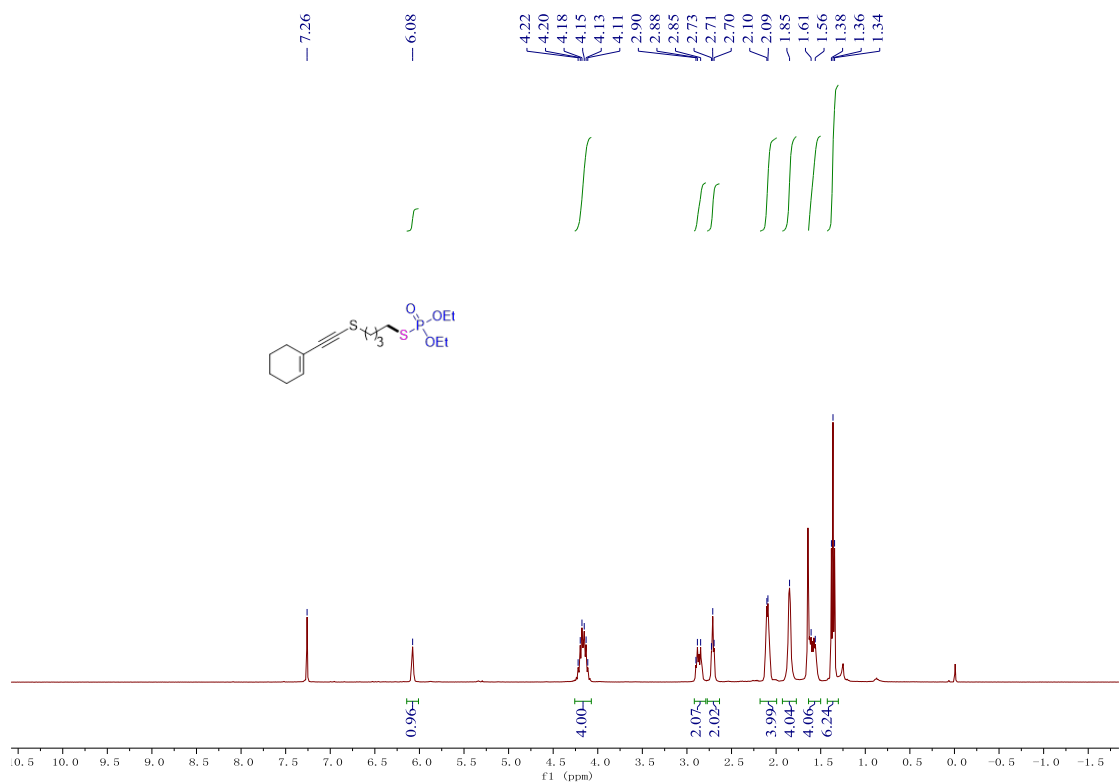

$^1\text{H}$  NMR (400 MHz,  $\text{CDCl}_3$ ) spectra of **7ja**

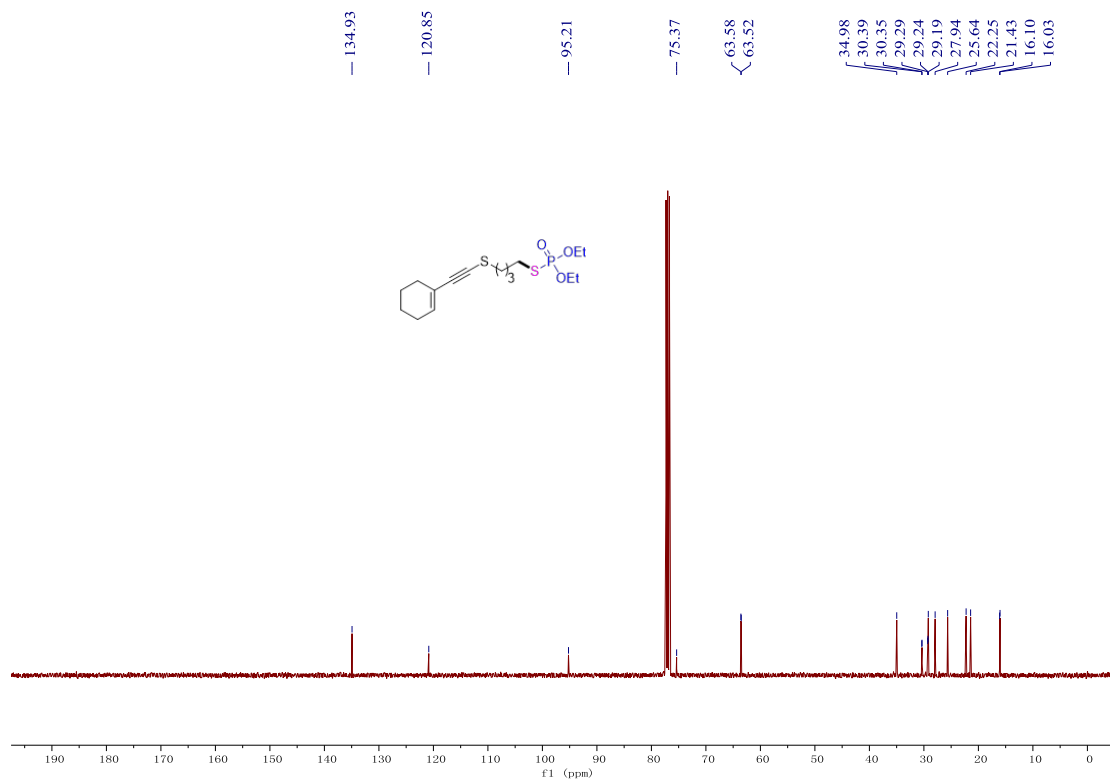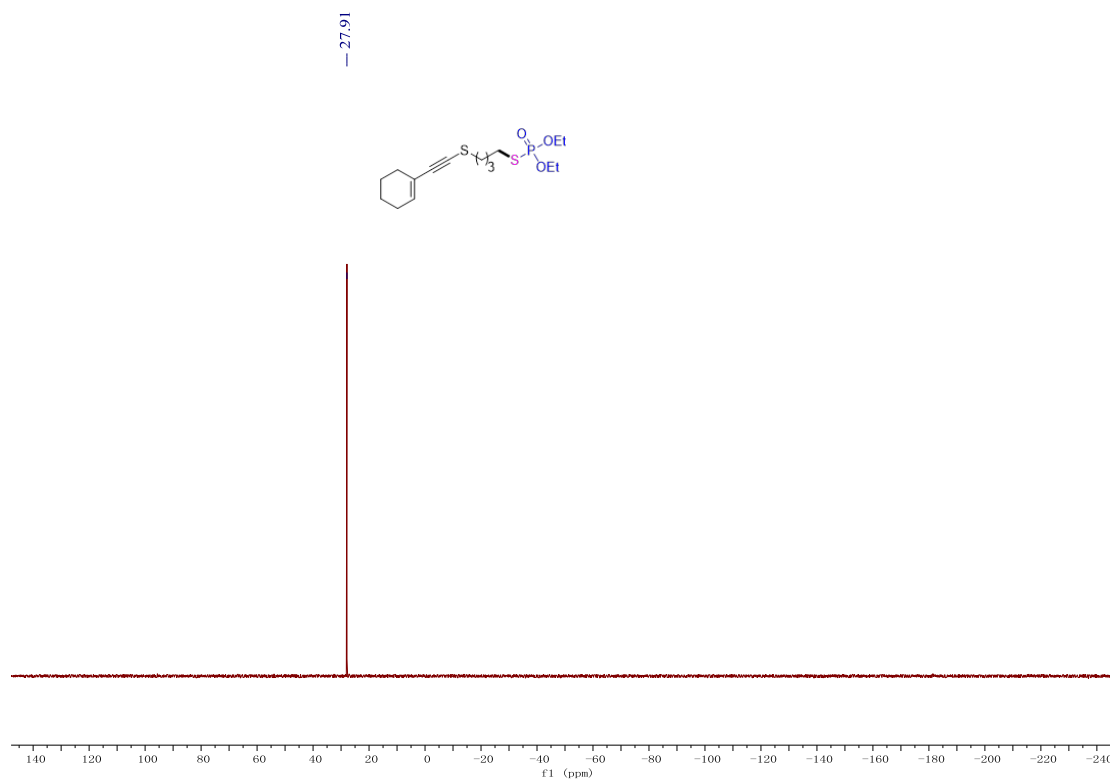

$^{31}\text{P}$  NMR (162 MHz,  $\text{CDCl}_3$ ) spectra of **7ja**

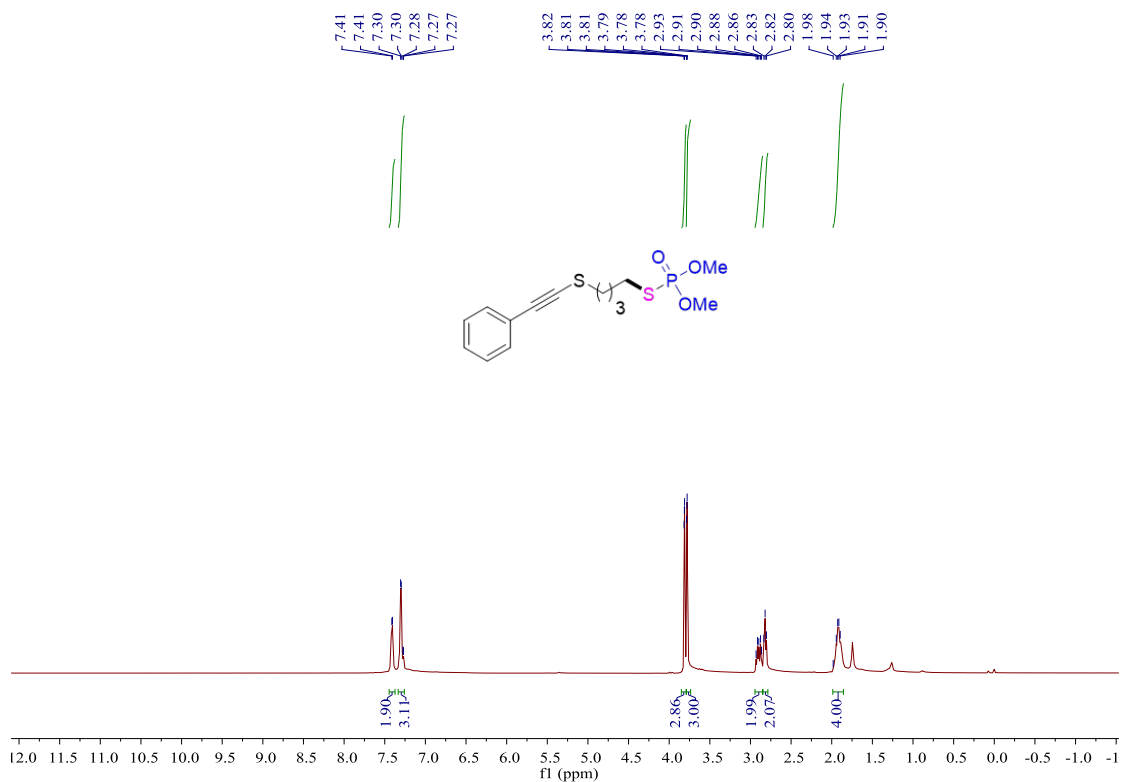

<sup>1</sup>H NMR (400 MHz, CDCl<sub>3</sub>) spectra of **7ab**

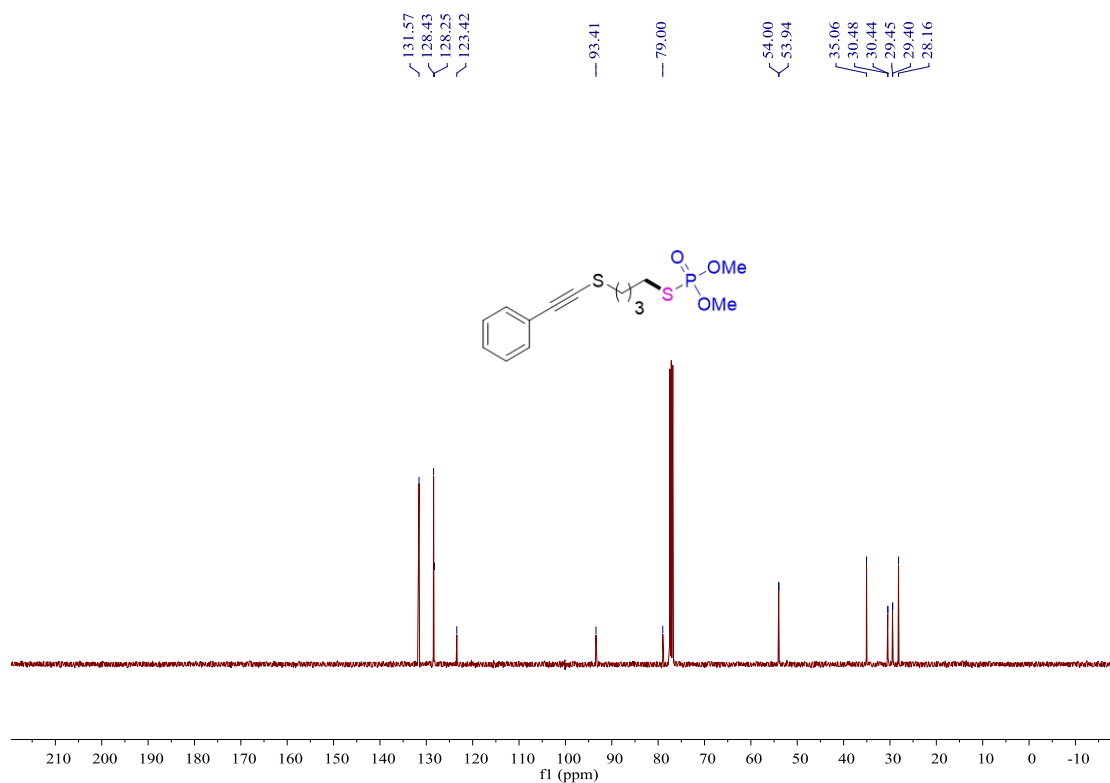

<sup>13</sup>C NMR (101 MHz, CDCl<sub>3</sub>) spectra of **7ab**

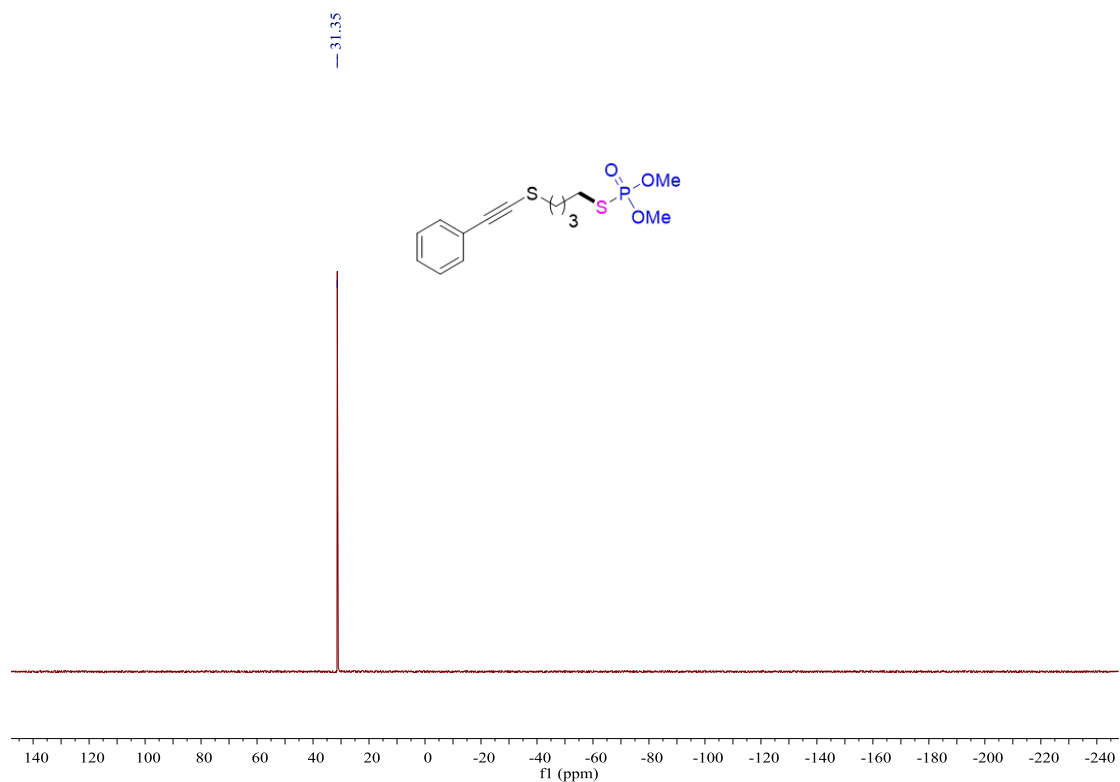

$^{31}\text{P}$  NMR (162 MHz,  $\text{CDCl}_3$ ) spectra of **7ab**

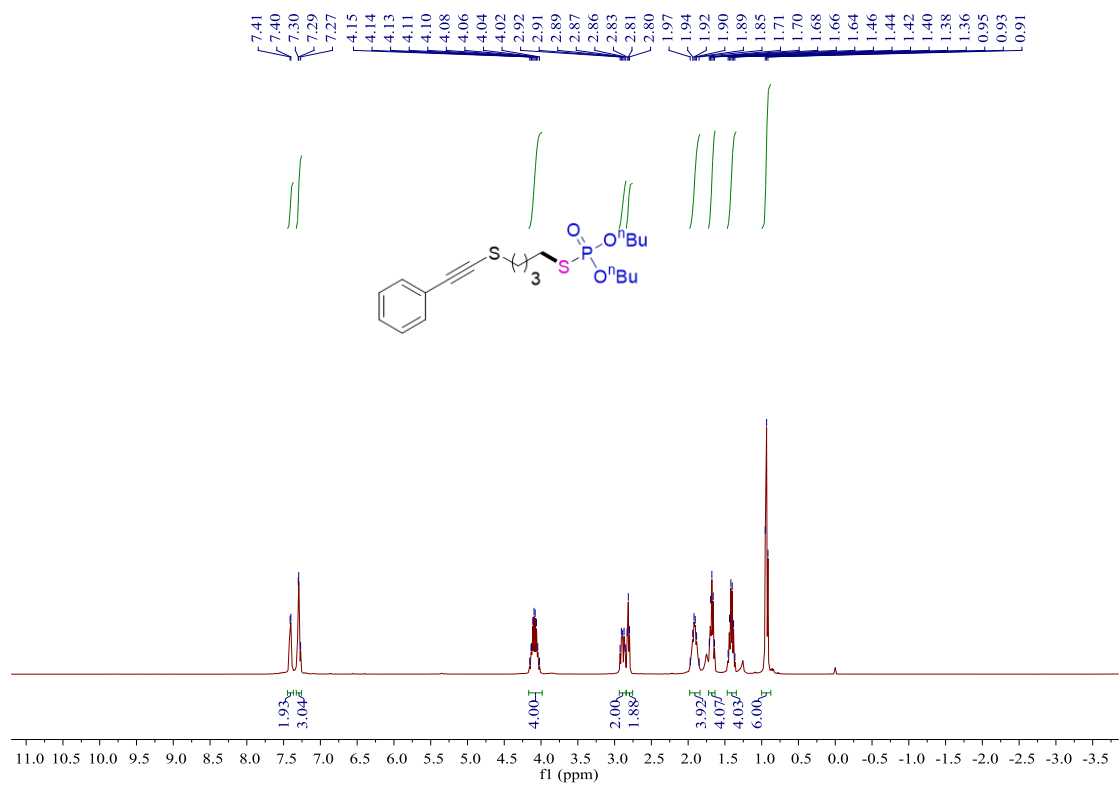

$^1\text{H}$  NMR (400 MHz,  $\text{CDCl}_3$ ) spectra of **7ac**



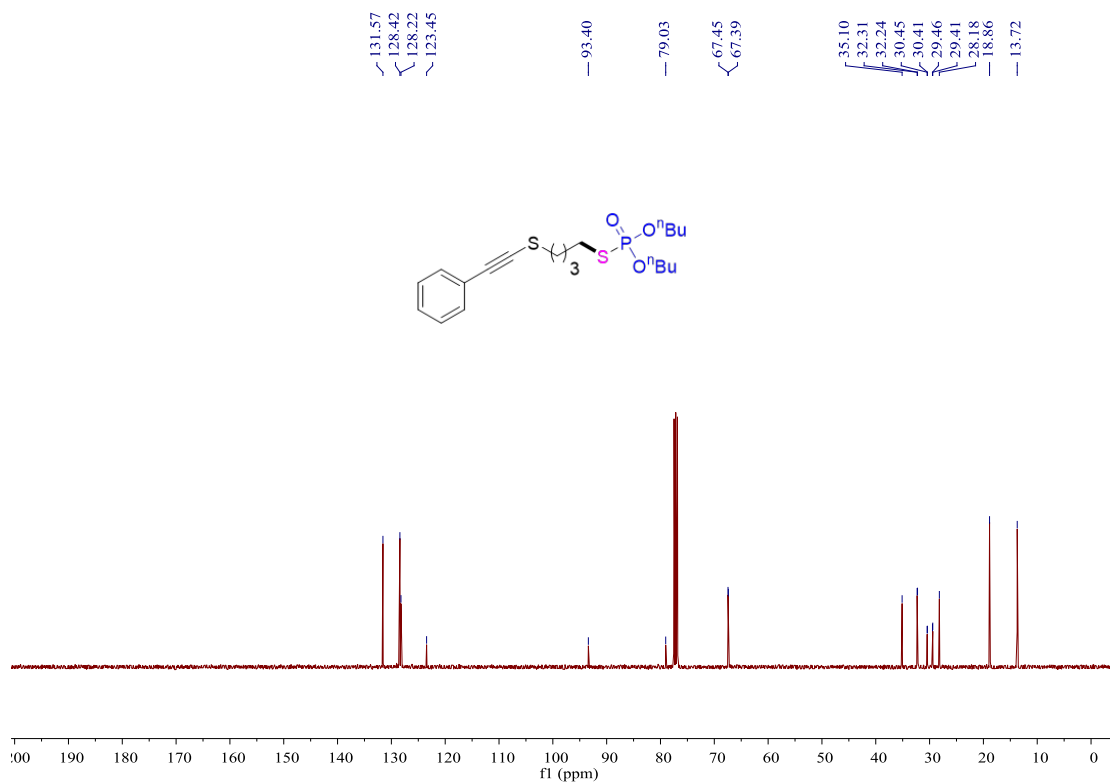

$^{13}\text{C}$  NMR (101 MHz,  $\text{CDCl}_3$ ) spectra of **7ac**

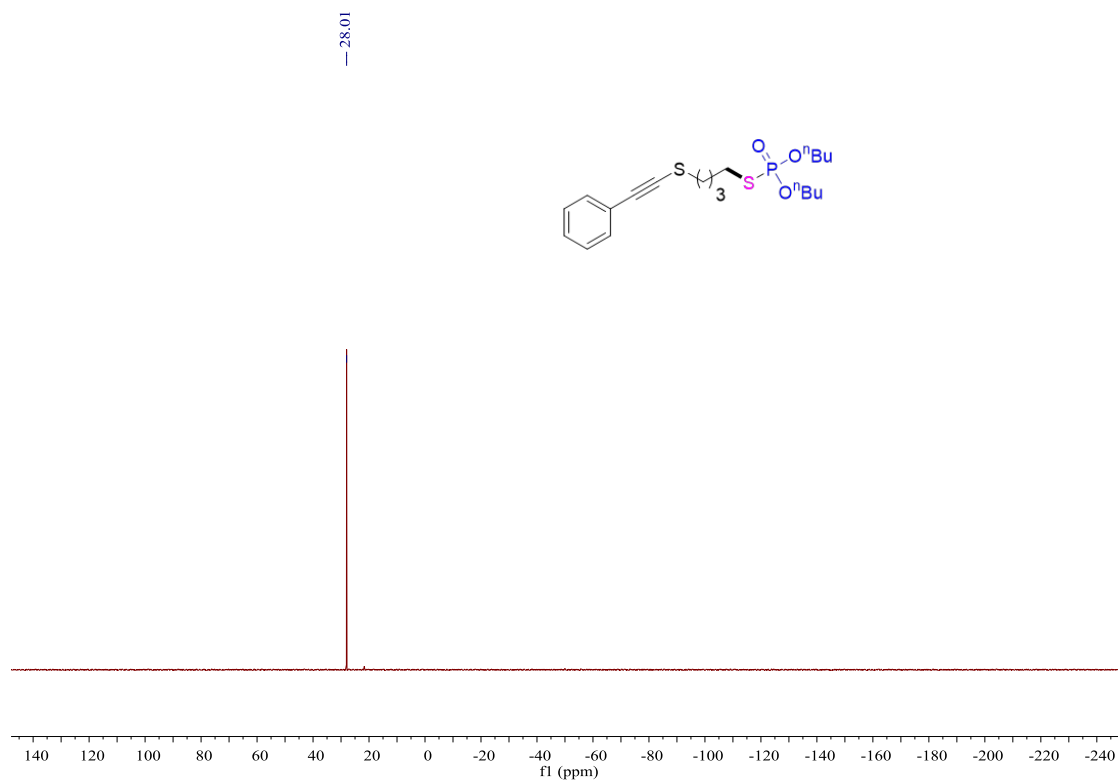

$^{31}\text{P}$  NMR (162 MHz,  $\text{CDCl}_3$ ) spectra of **7ac**

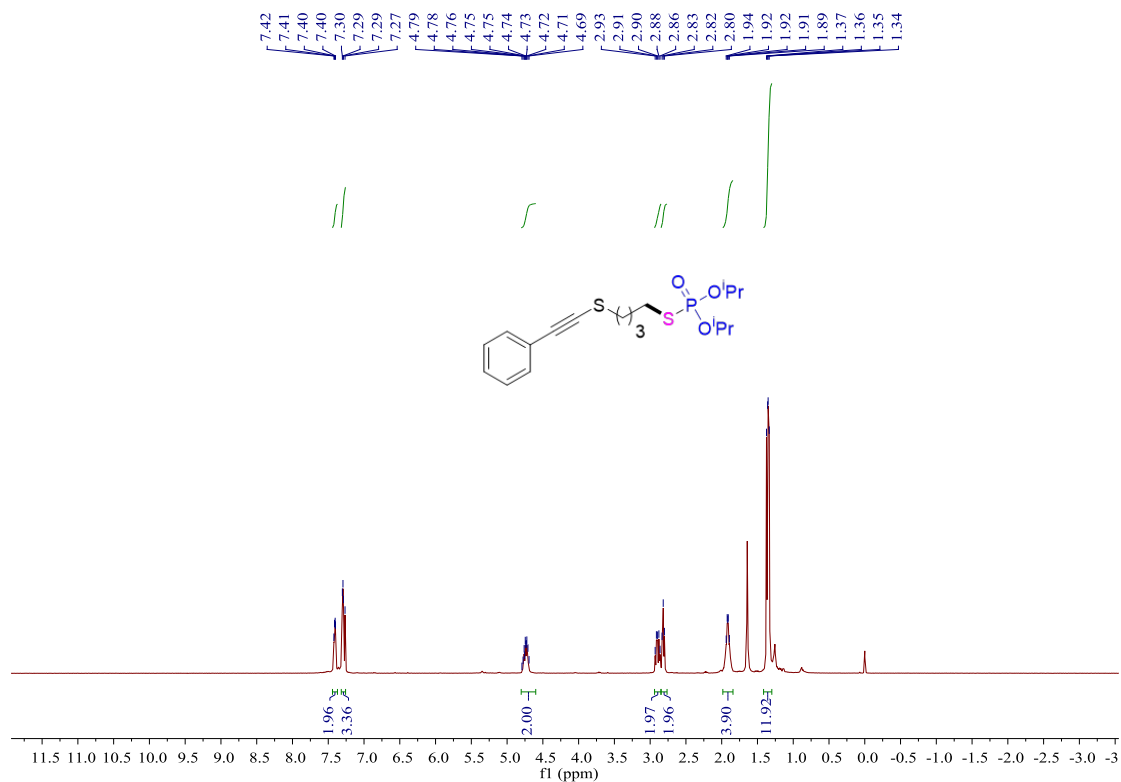

<sup>1</sup>H NMR (400 MHz, CDCl<sub>3</sub>) spectra of **7ad**

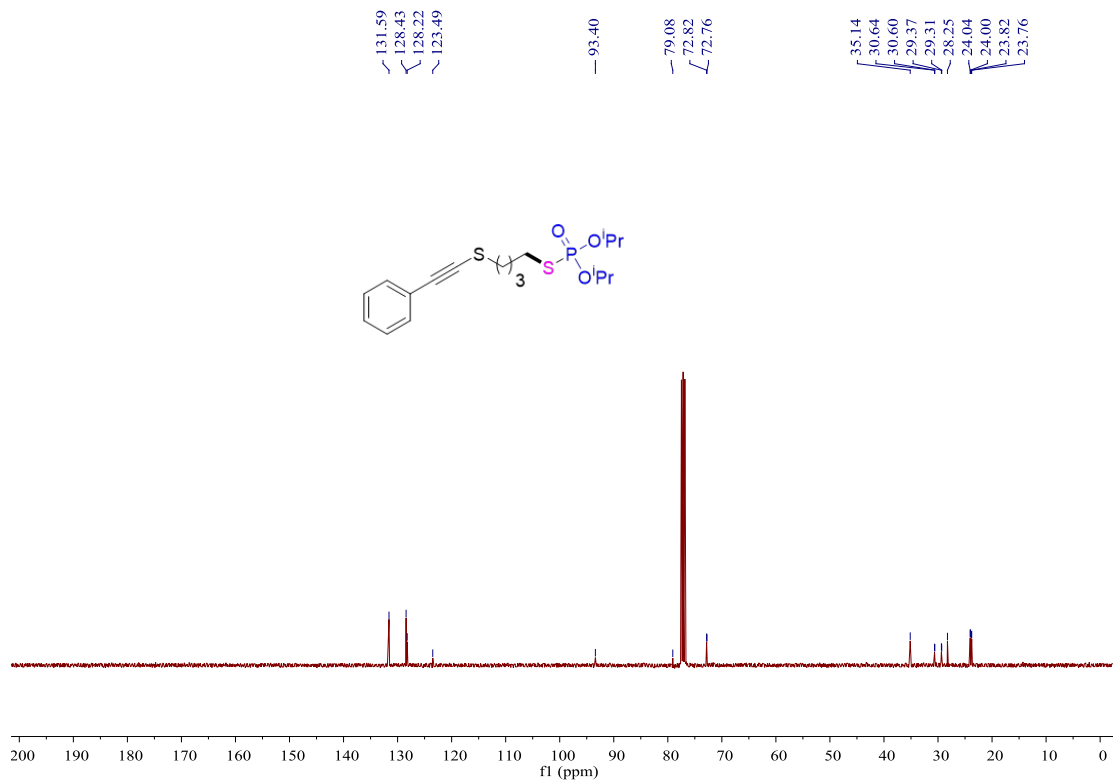

<sup>13</sup>C NMR (101 MHz, CDCl<sub>3</sub>) spectra of **7ad**

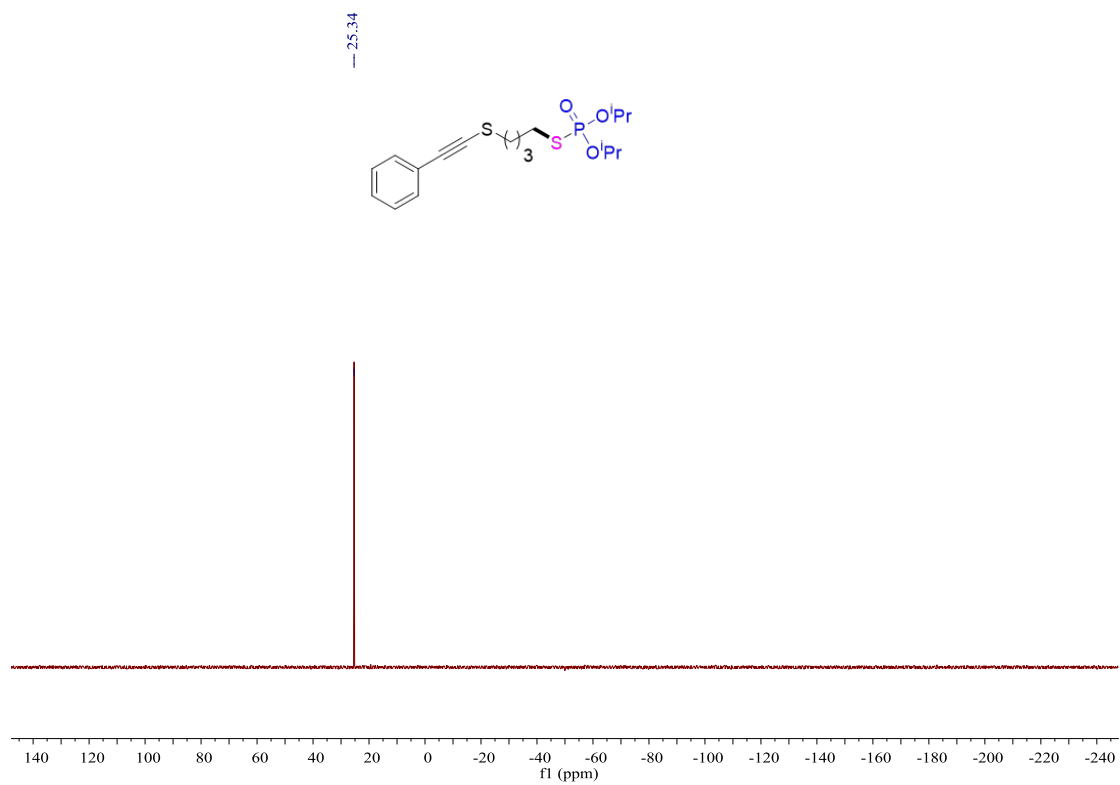

<sup>31</sup>P NMR (162 MHz, CDCl<sub>3</sub>) spectra of **7ad**

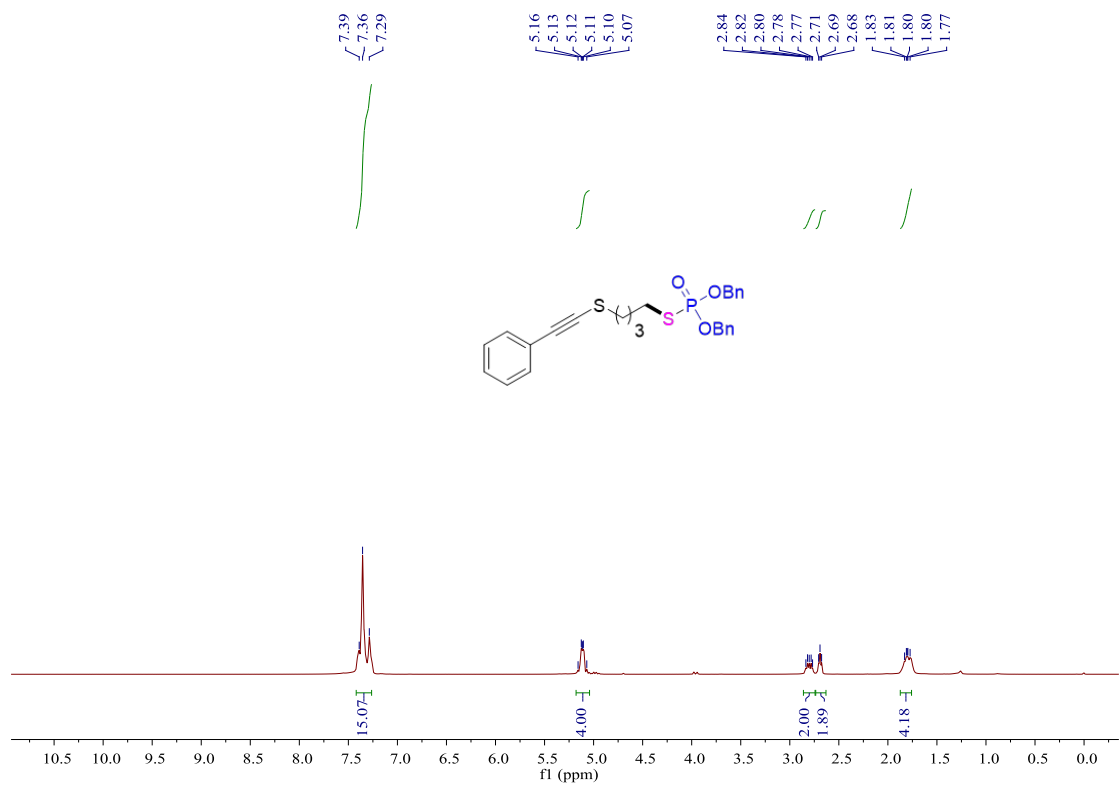

<sup>1</sup>H NMR (400 MHz, CDCl<sub>3</sub>) spectra of **7ae**

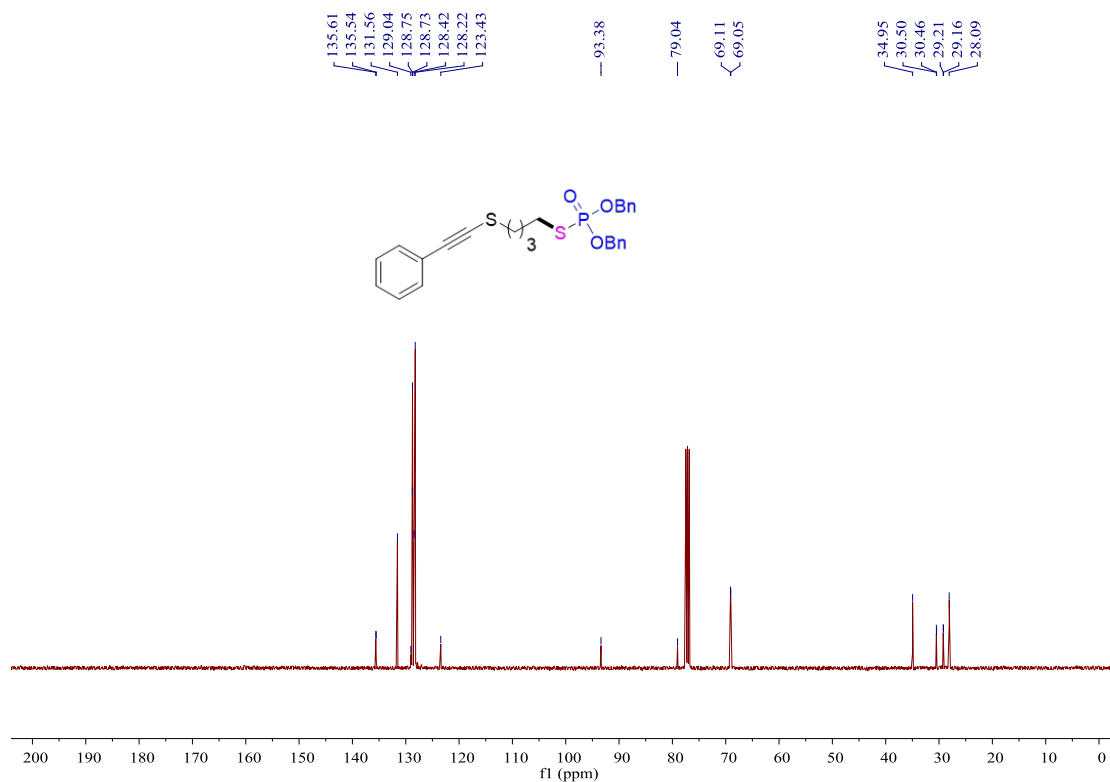

$^{13}\text{C}$  NMR (101 MHz,  $\text{CDCl}_3$ ) spectra of **7ae**

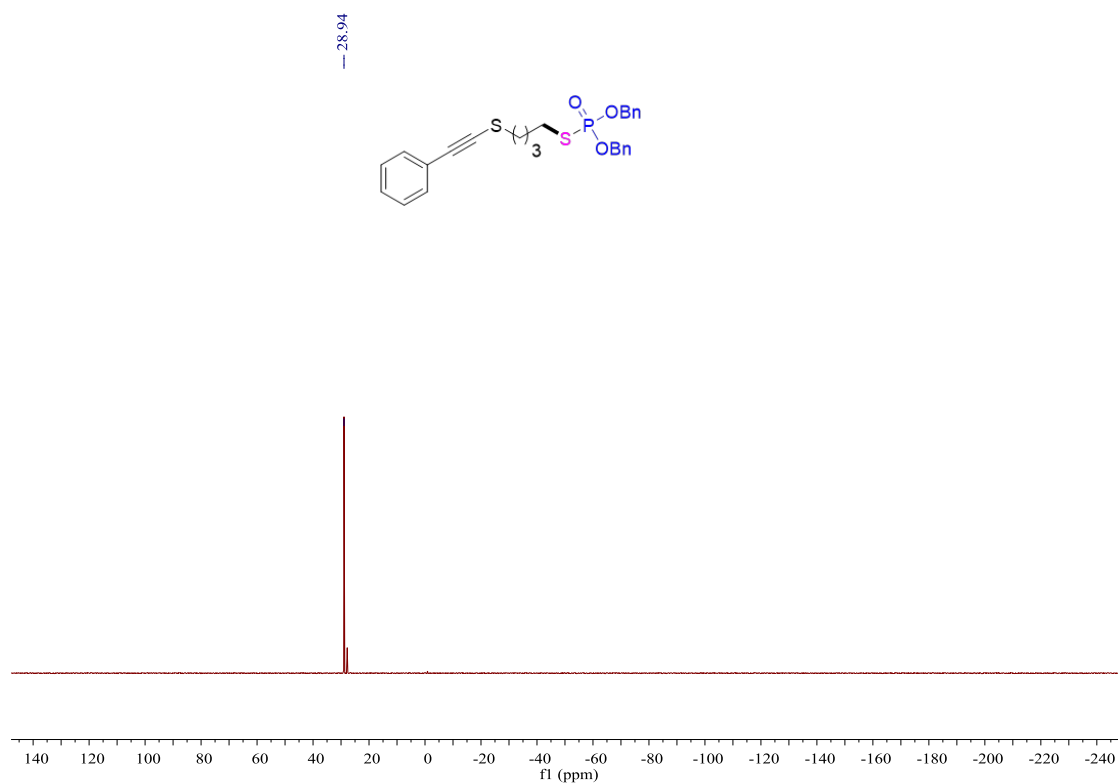

$^{31}\text{P}$  NMR (162 MHz,  $\text{CDCl}_3$ ) spectra of **7ae**

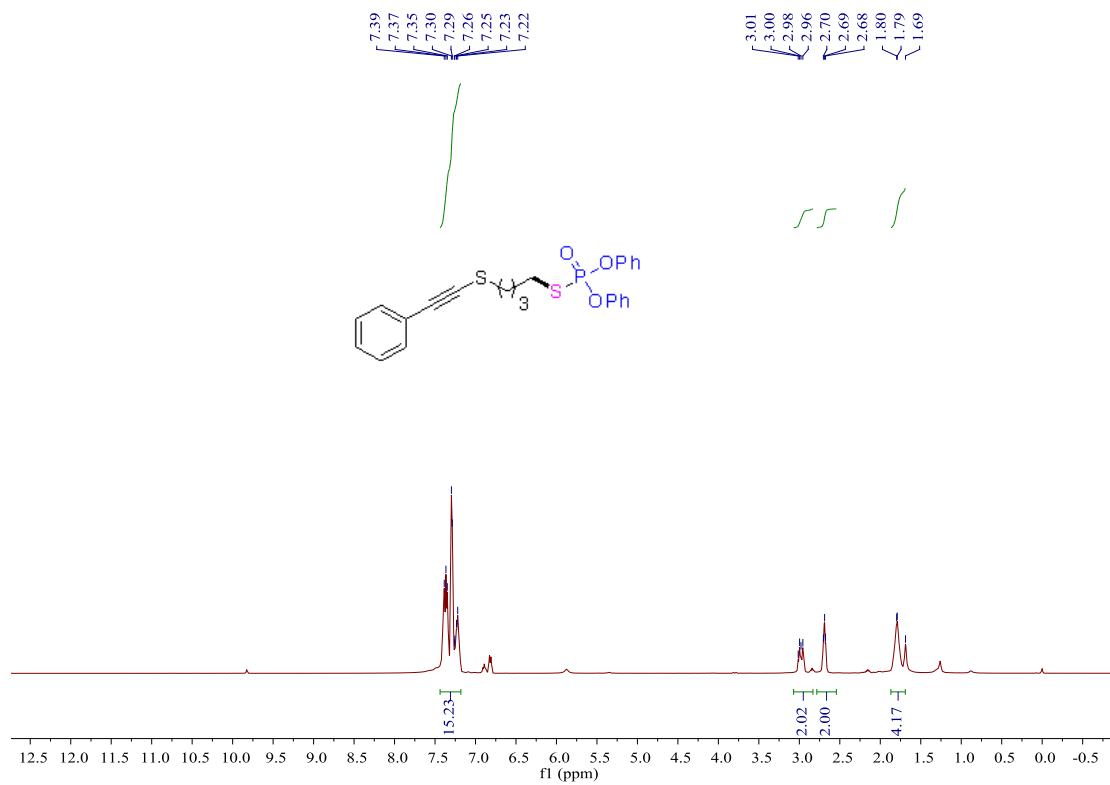

$^1\text{H}$  NMR (400 MHz,  $\text{CDCl}_3$ ) spectra of **7af**

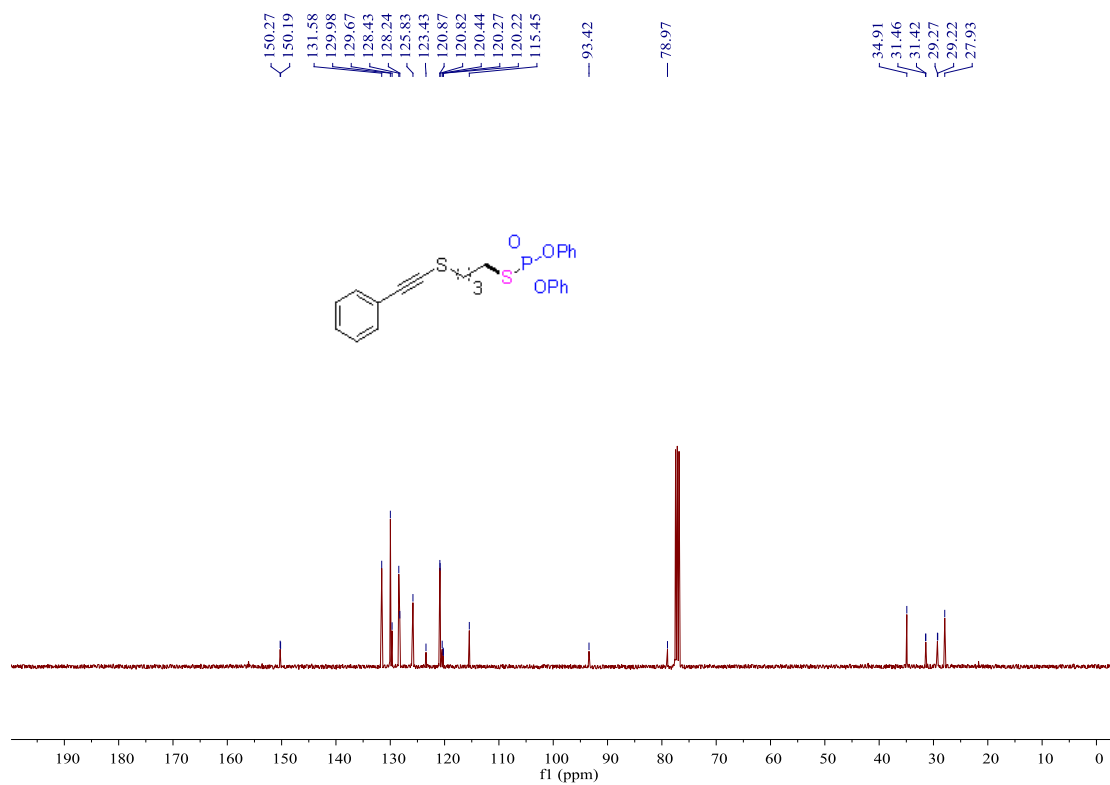

$^{13}\text{C}$  NMR (101 MHz,  $\text{CDCl}_3$ ) spectra of **7af**

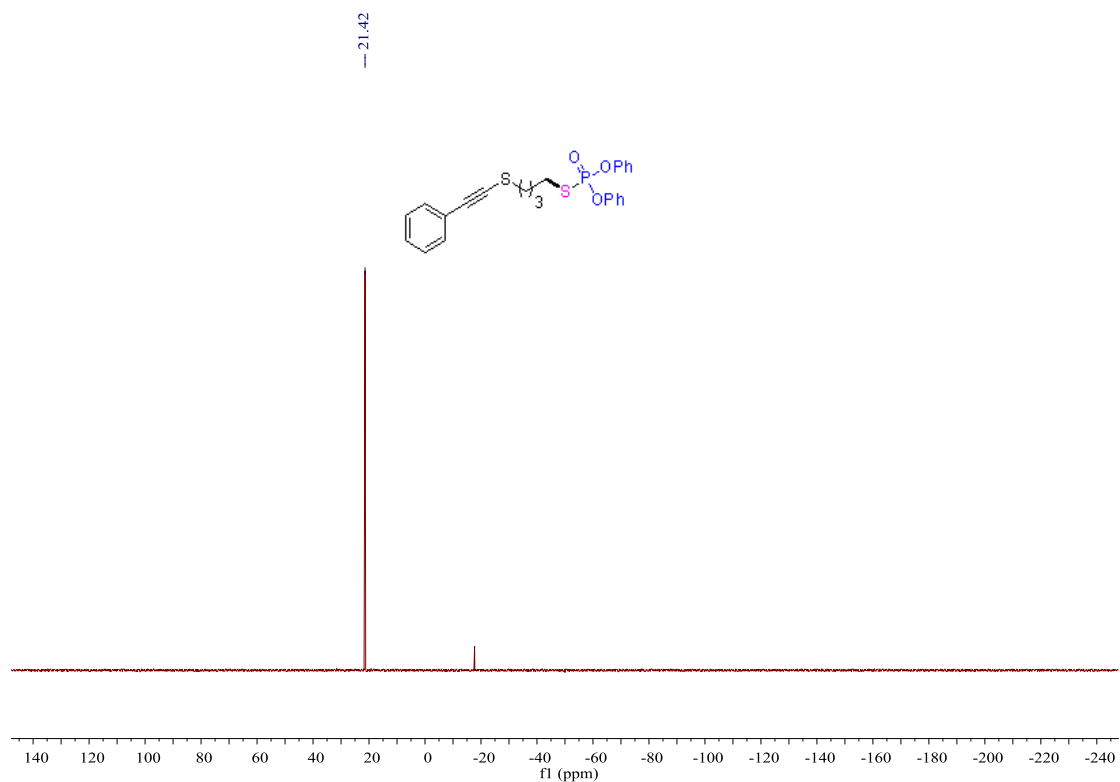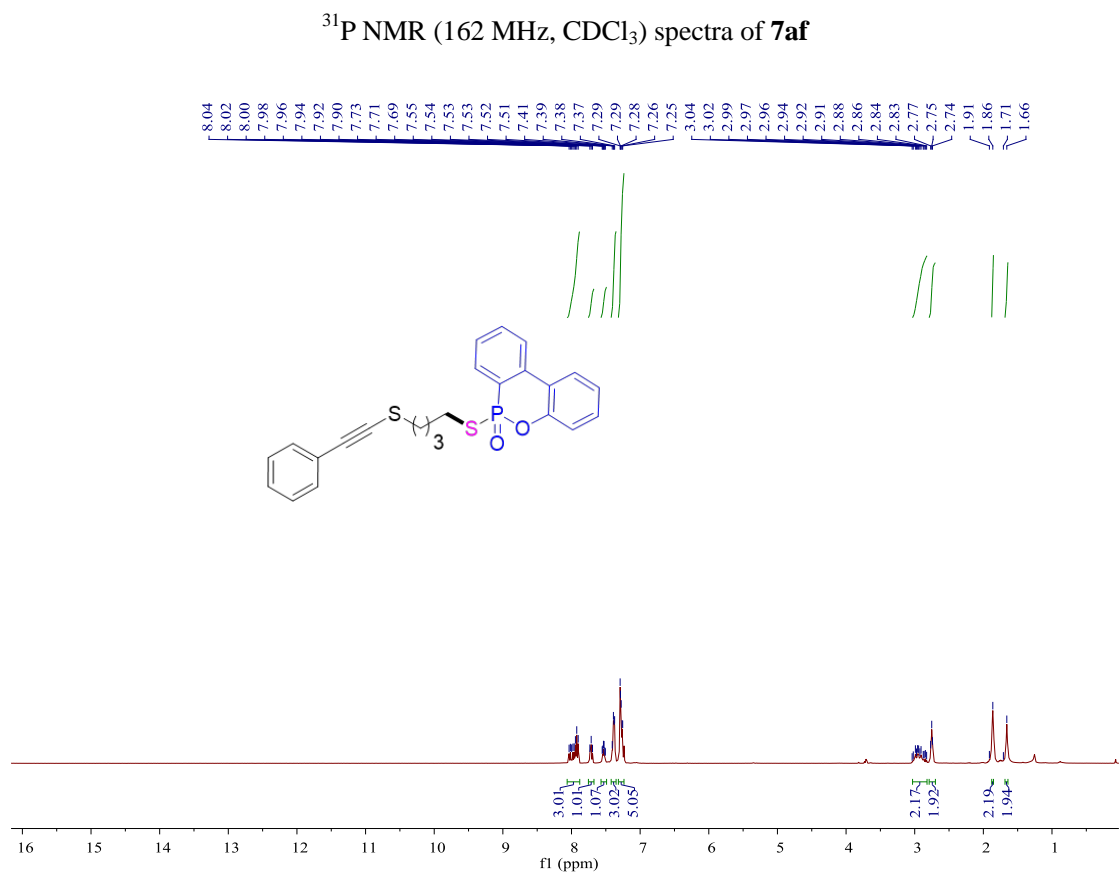

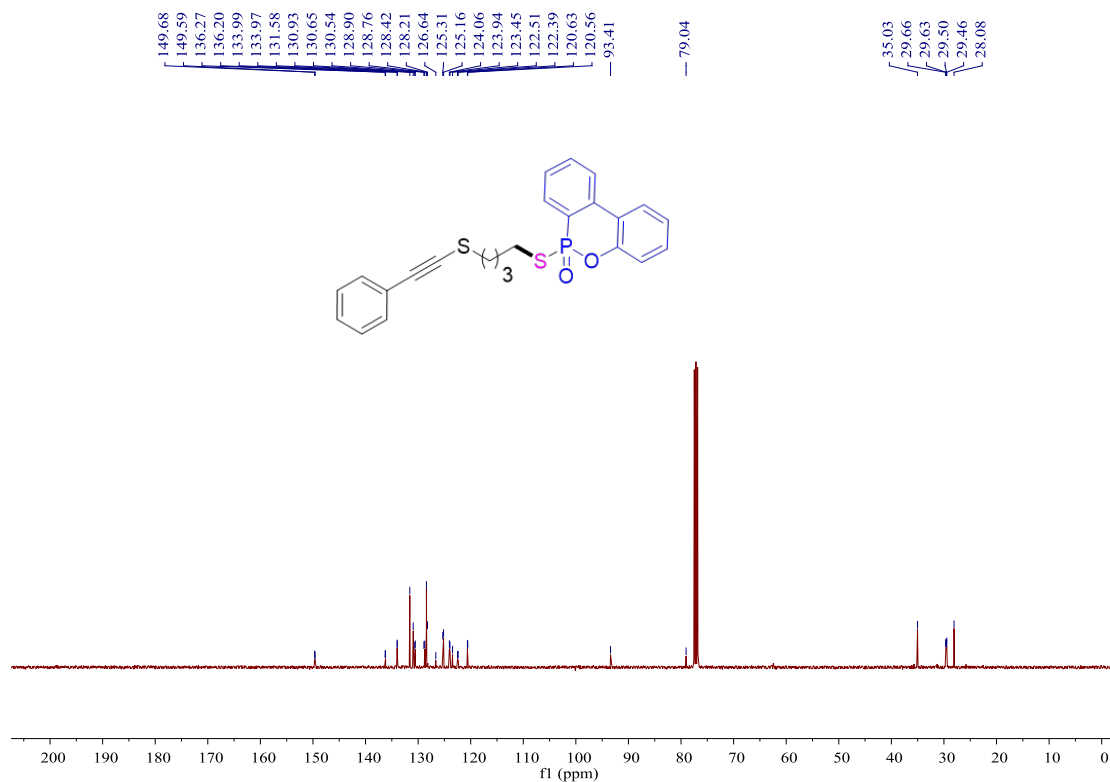

$^{13}\text{C}$  NMR (101 MHz,  $\text{CDCl}_3$ ) spectra of **7ag**

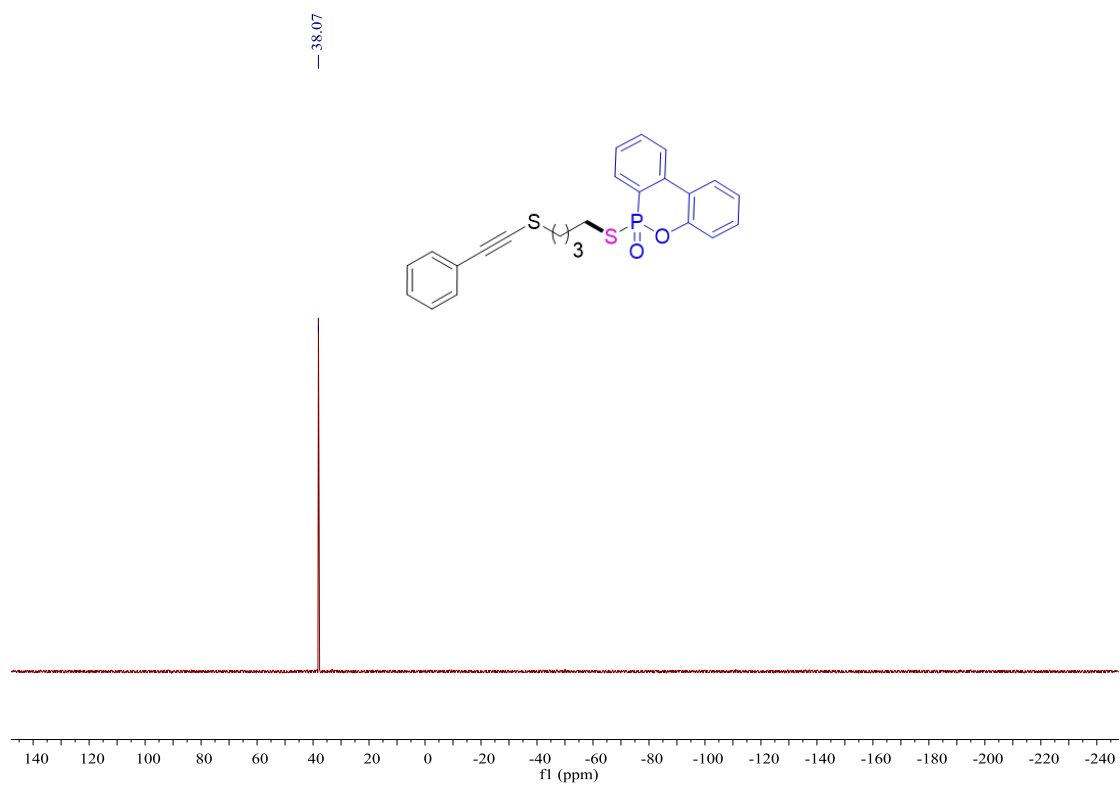

$^{31}\text{P}$  NMR (162 MHz,  $\text{CDCl}_3$ ) spectra of **7ag**

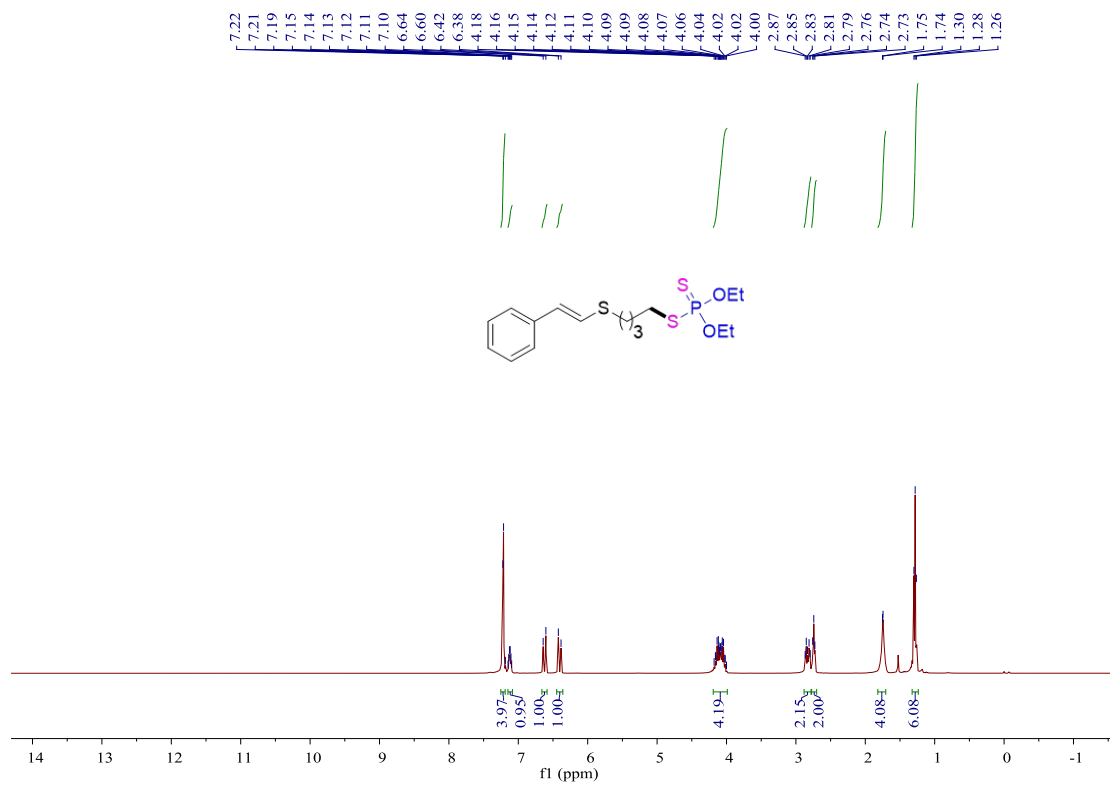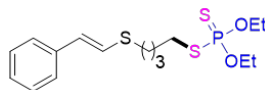

$^1\text{H}$  NMR (400 MHz,  $\text{CDCl}_3$ ) spectra of **9a**

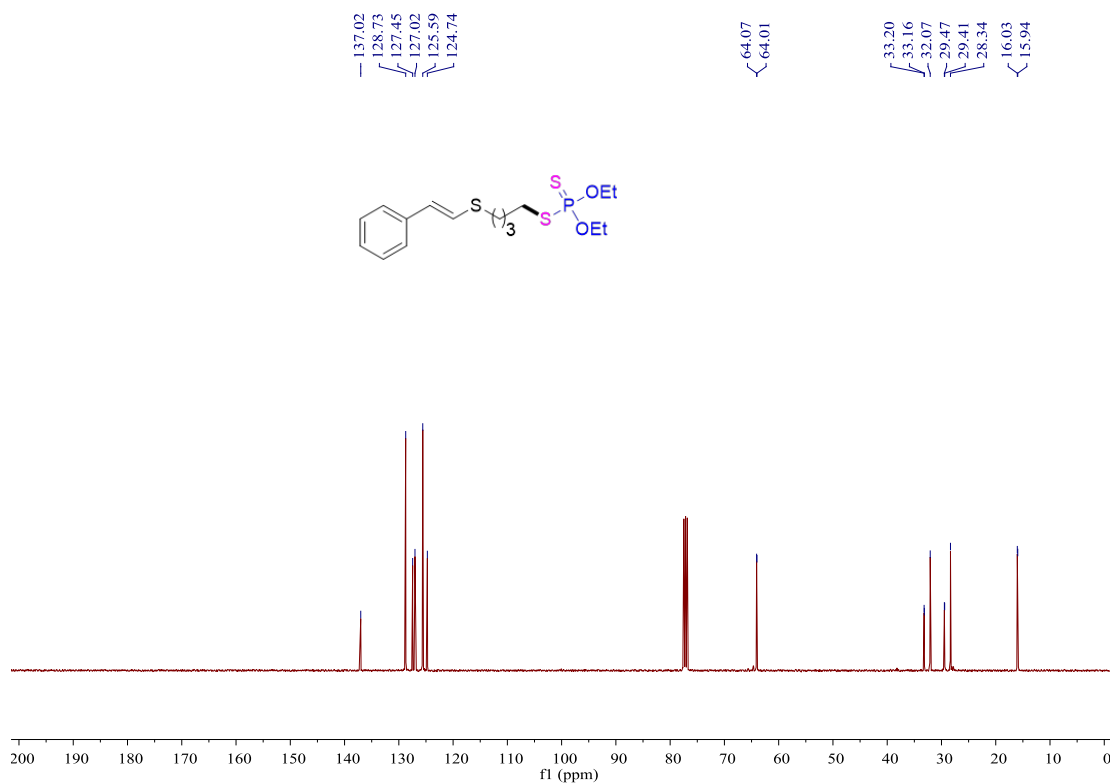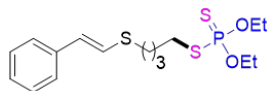

$^{13}\text{C}$  NMR (101 MHz,  $\text{CDCl}_3$ ) spectra of **9a**



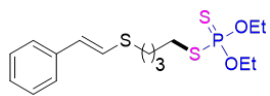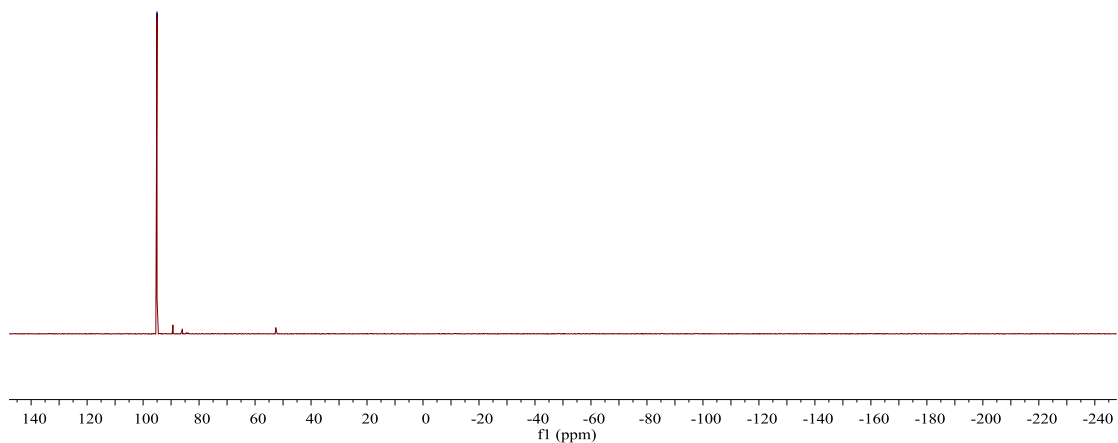

$^{31}\text{P}$  NMR (162 MHz,  $\text{CDCl}_3$ ) spectra of **9a**

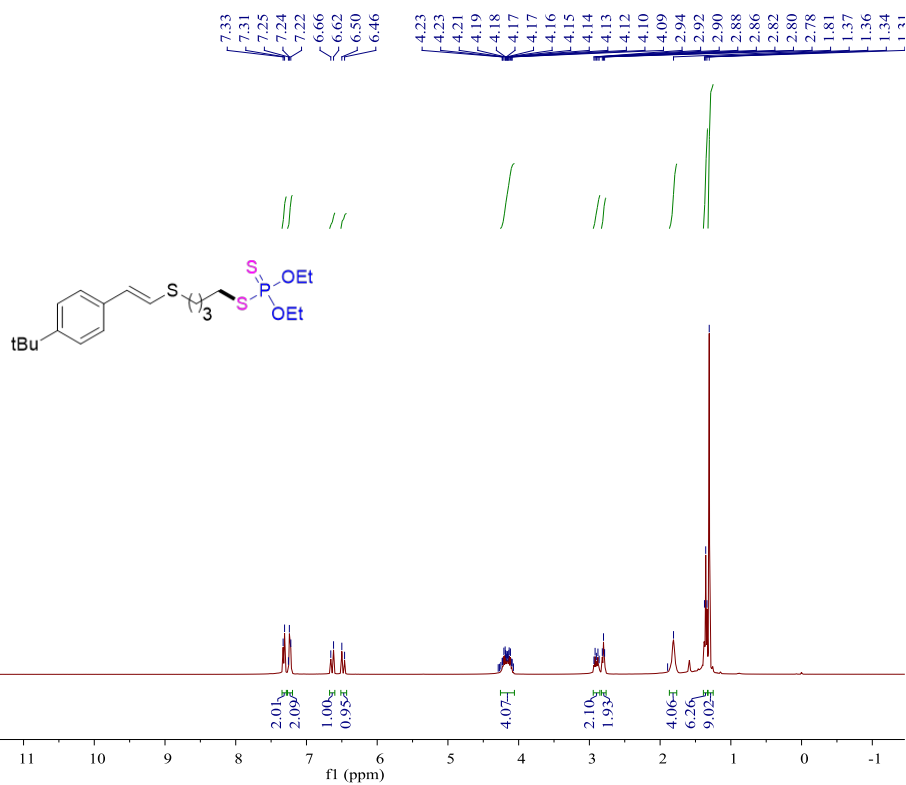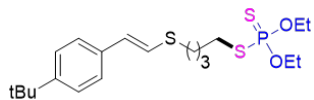

$^1\text{H}$  NMR (400 MHz,  $\text{CDCl}_3$ ) spectra of **9b**

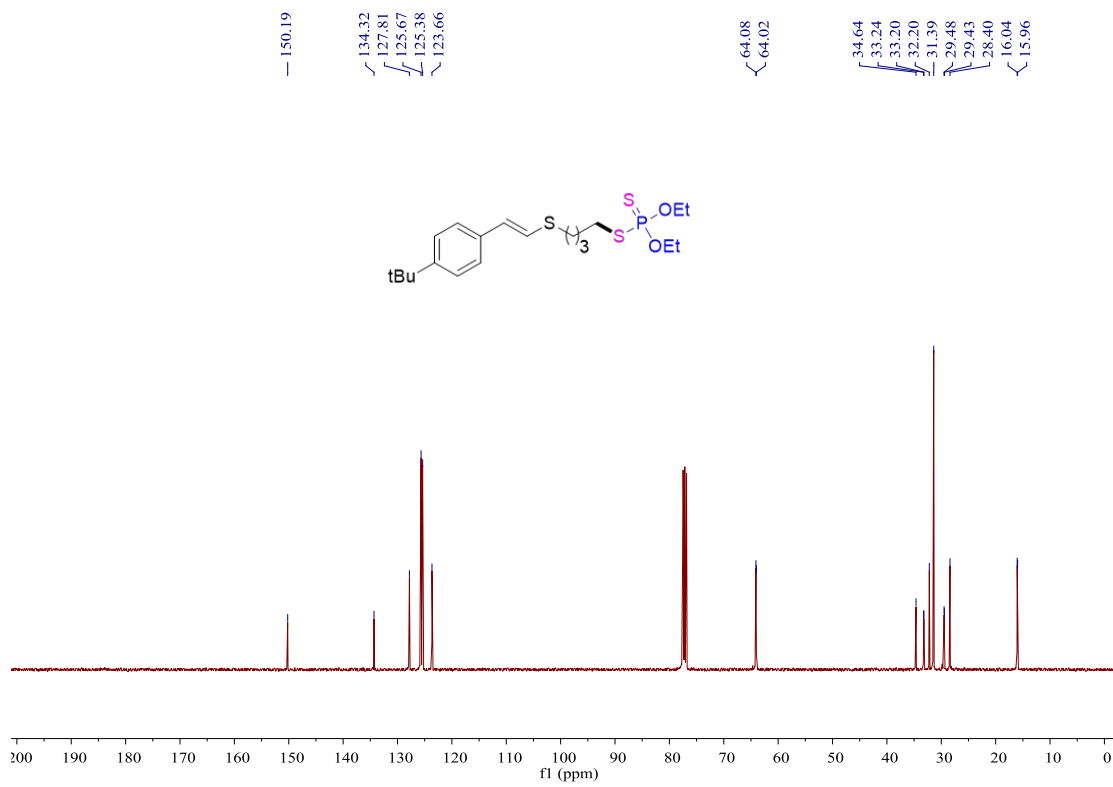

<sup>13</sup>C NMR (101 MHz, CDCl<sub>3</sub>) spectra of **9b**

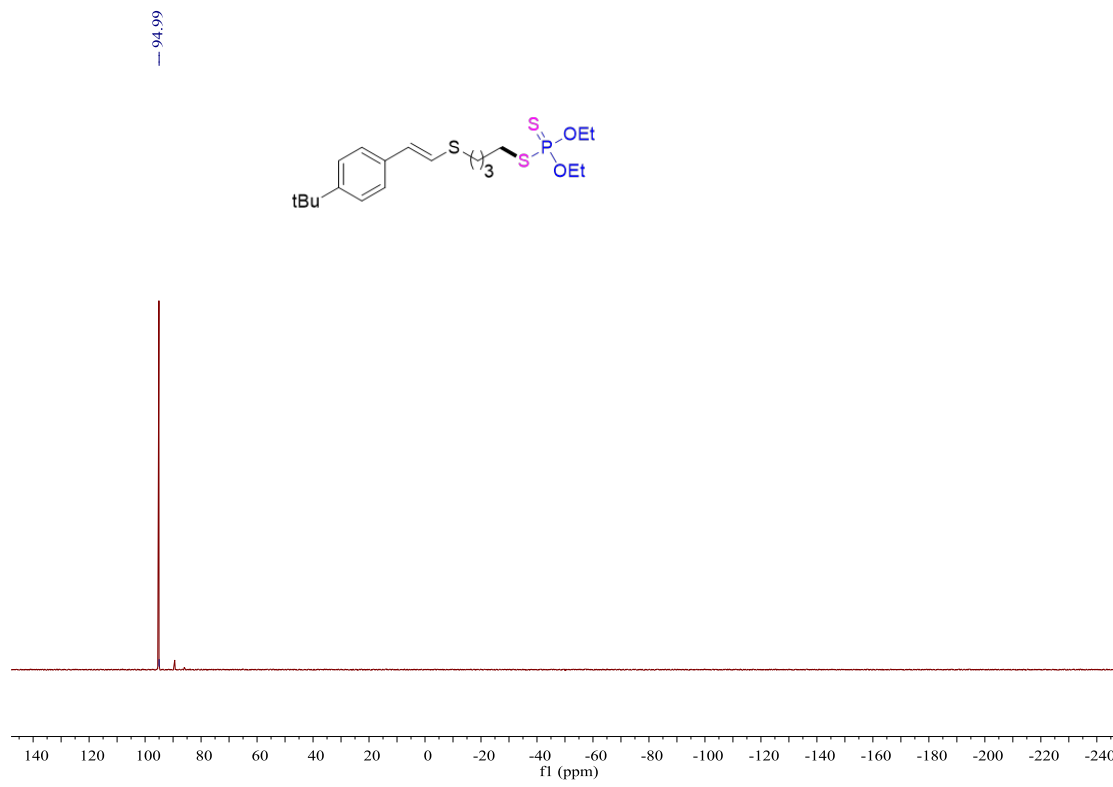

<sup>31</sup>P NMR (162 MHz, CDCl<sub>3</sub>) spectra of **9b**

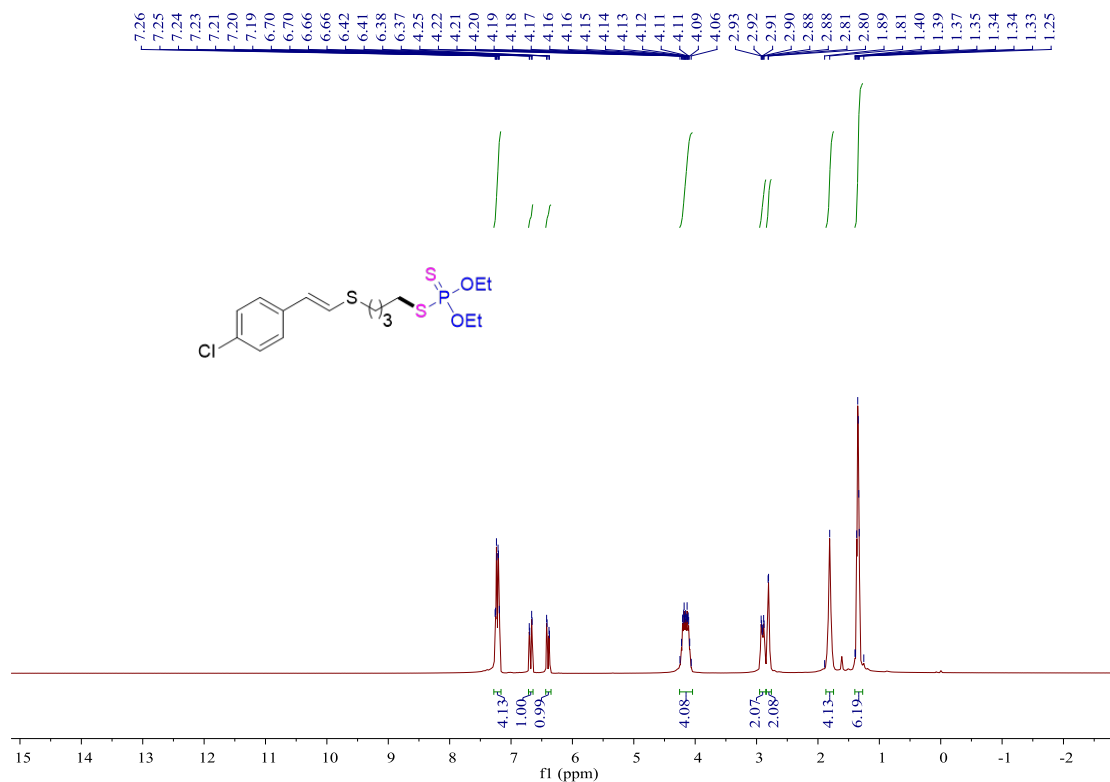

<sup>1</sup>H NMR (400 MHz, CDCl<sub>3</sub>) spectra of **9c**

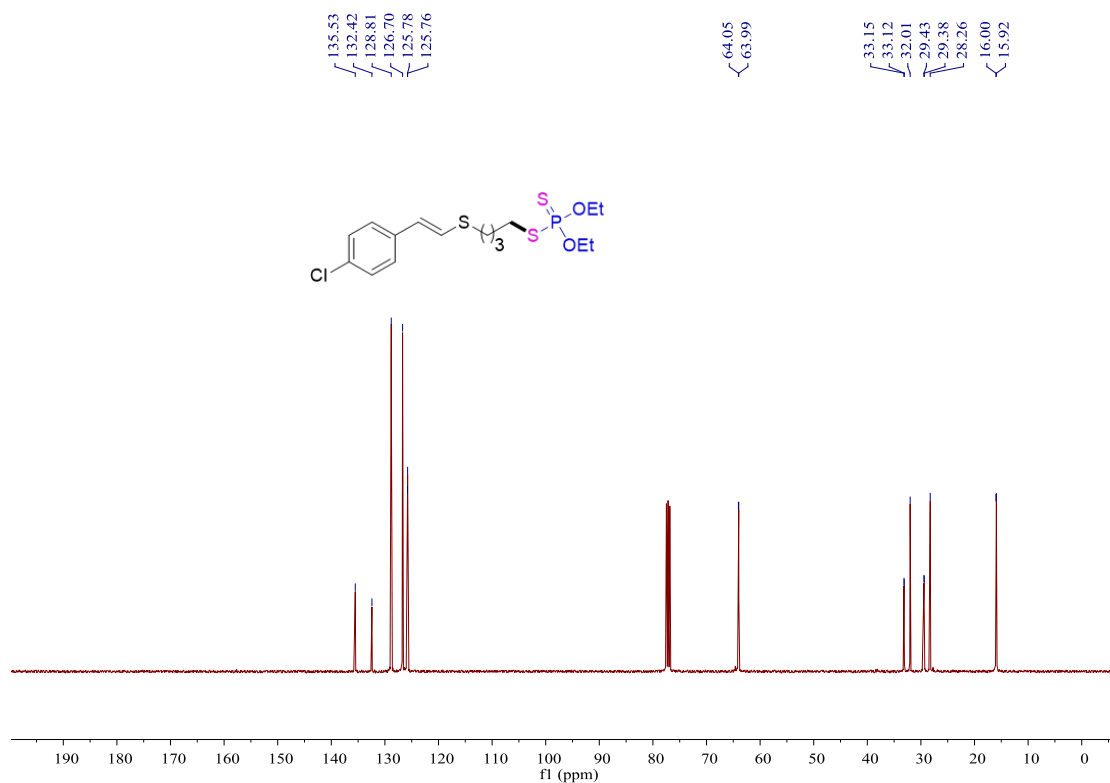

<sup>13</sup>C NMR (101 MHz, CDCl<sub>3</sub>) spectra of **9c**

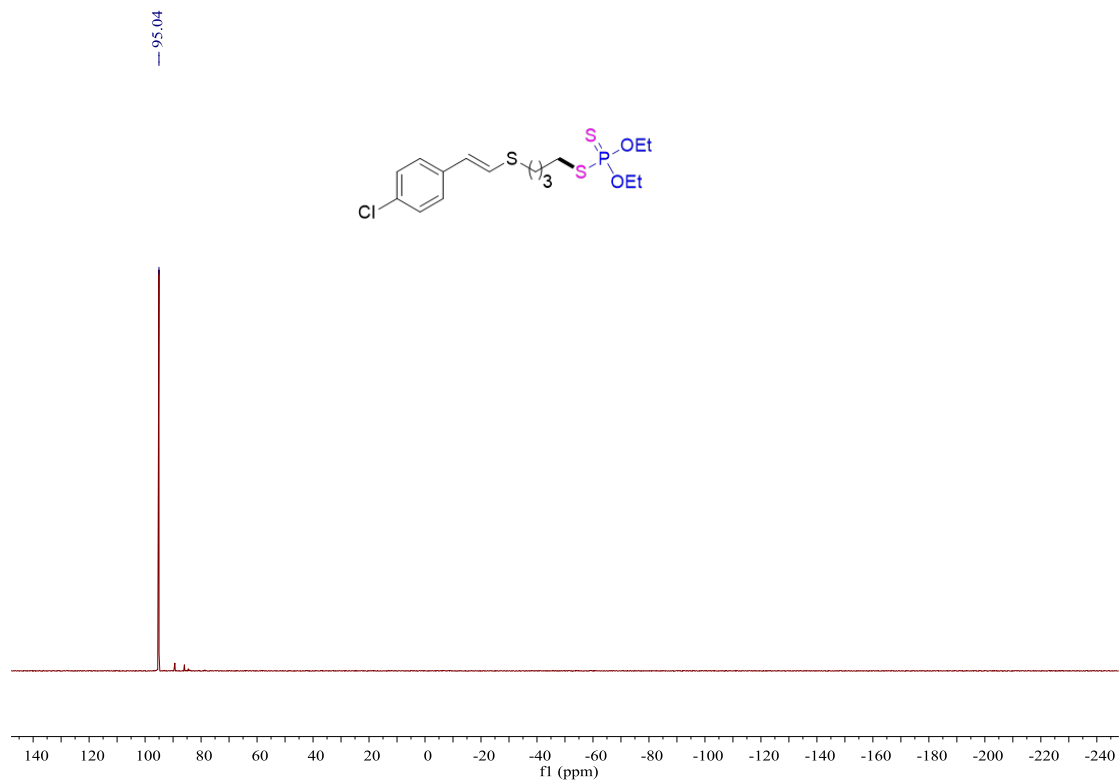

$^{31}\text{P}$  NMR (162 MHz,  $\text{CDCl}_3$ ) spectra of **9c**

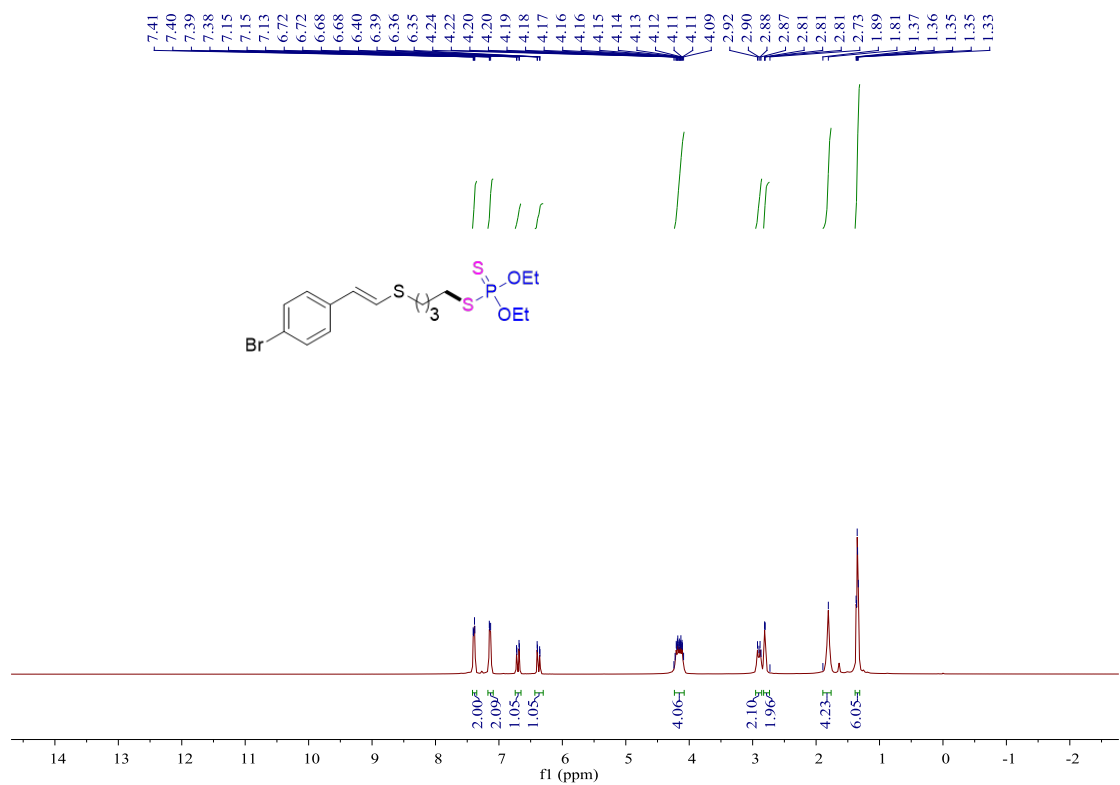

$^1\text{H}$  NMR (400 MHz,  $\text{CDCl}_3$ ) spectra of **9d**

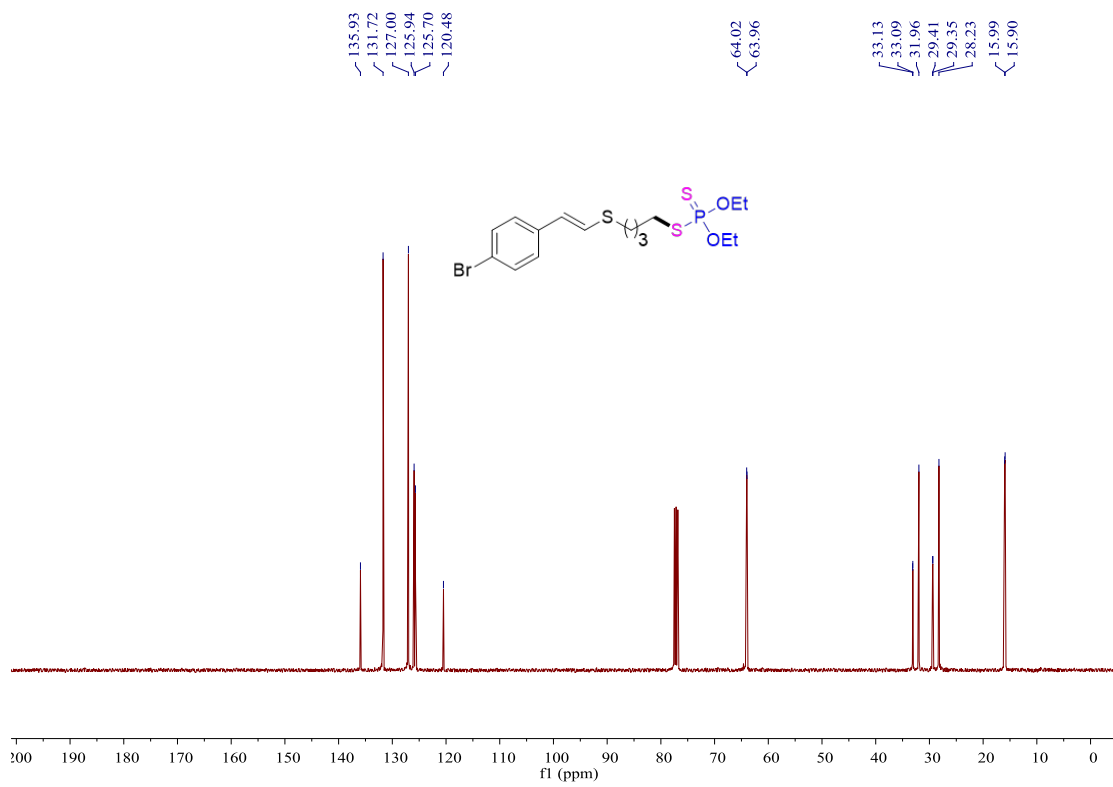

<sup>13</sup>C NMR (101 MHz, CDCl<sub>3</sub>) spectra of **9d**

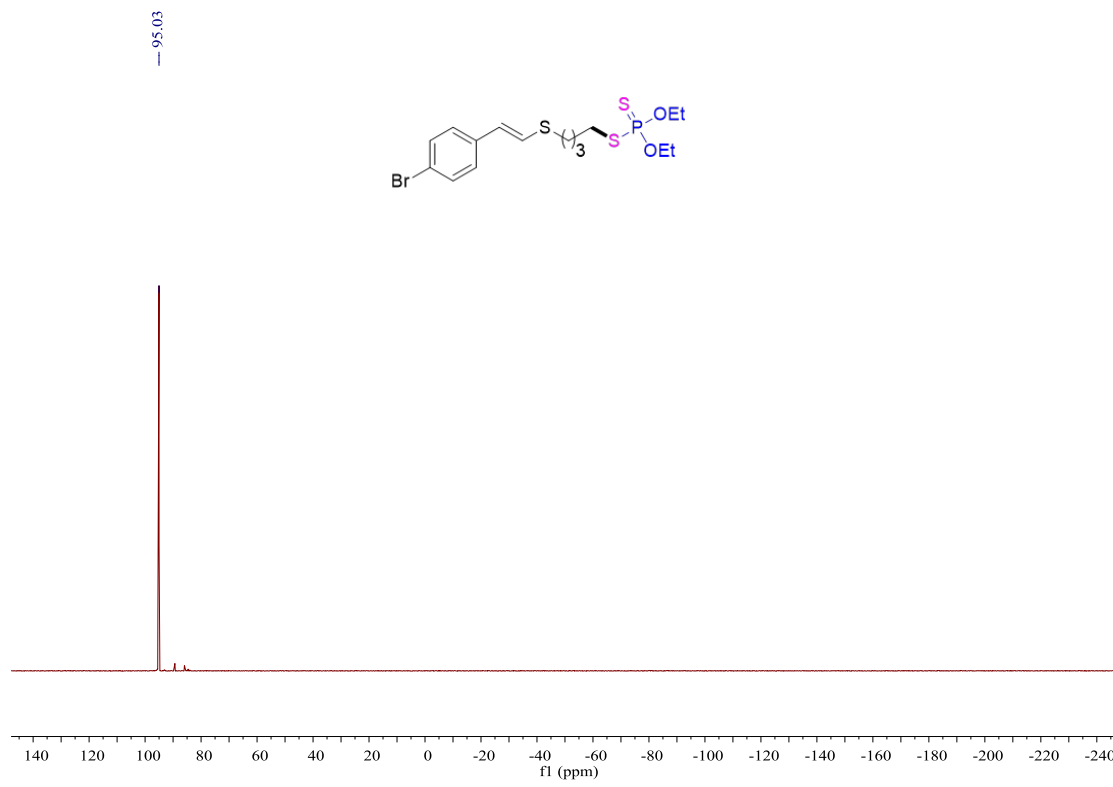

<sup>31</sup>P NMR (162 MHz, CDCl<sub>3</sub>) spectra of **9d**

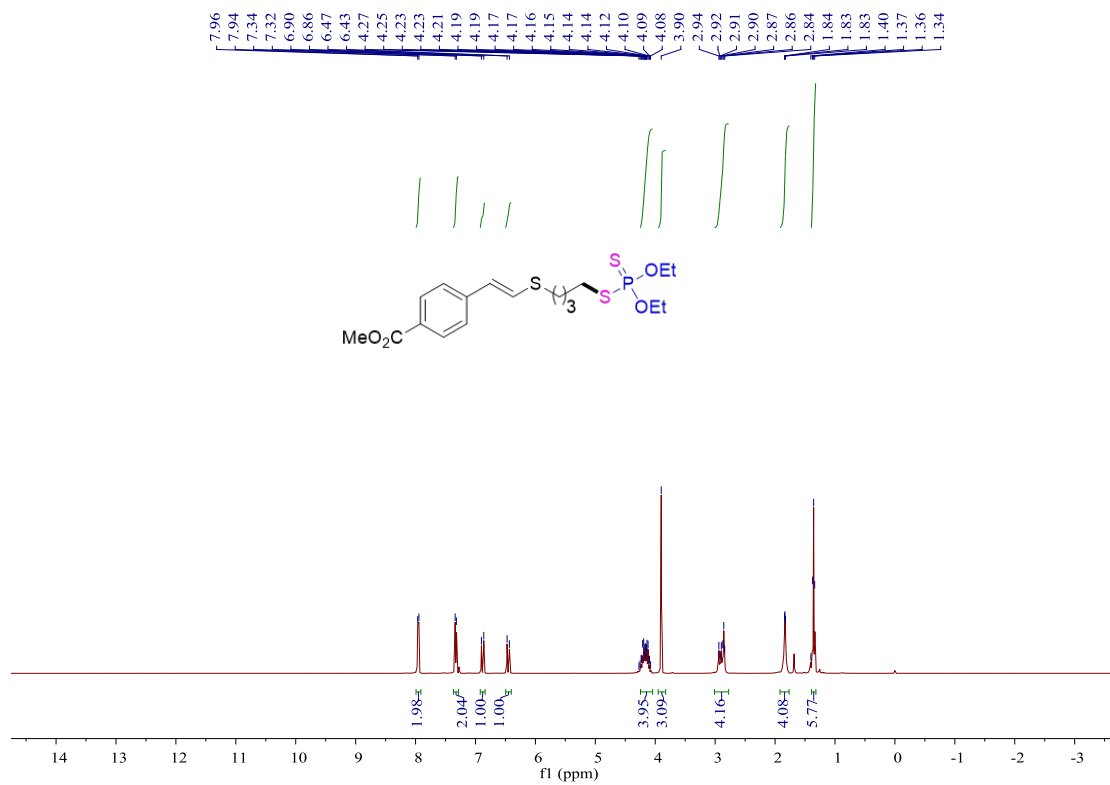

<sup>1</sup>H NMR (400 MHz, CDCl<sub>3</sub>) spectra of **9e**

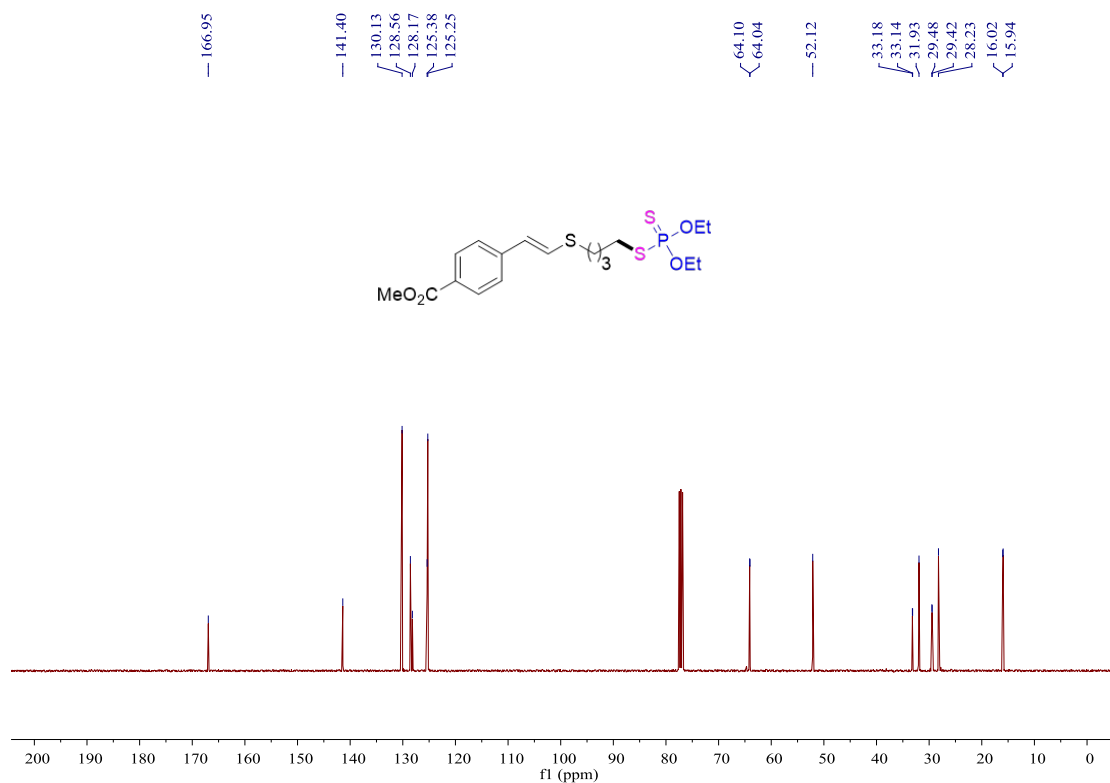

<sup>13</sup>C NMR (101 MHz, CDCl<sub>3</sub>) spectra of **9e**

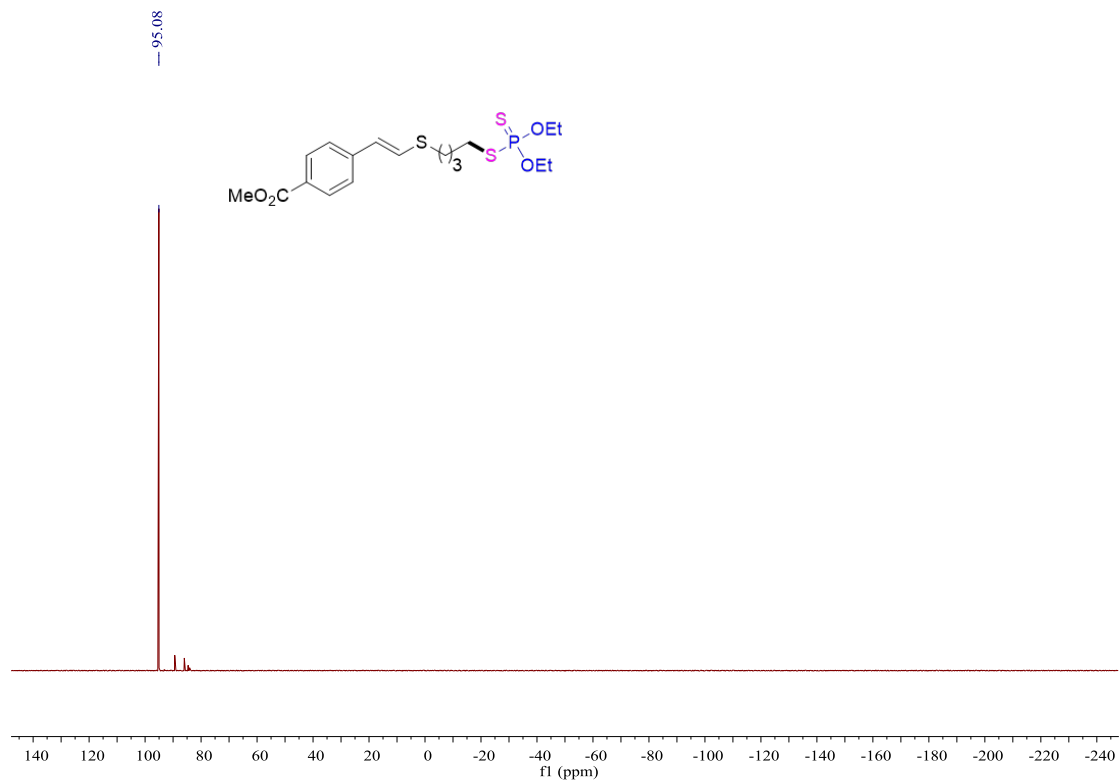

$^{31}\text{P}$  NMR (162 MHz,  $\text{CDCl}_3$ ) spectra of **9e**

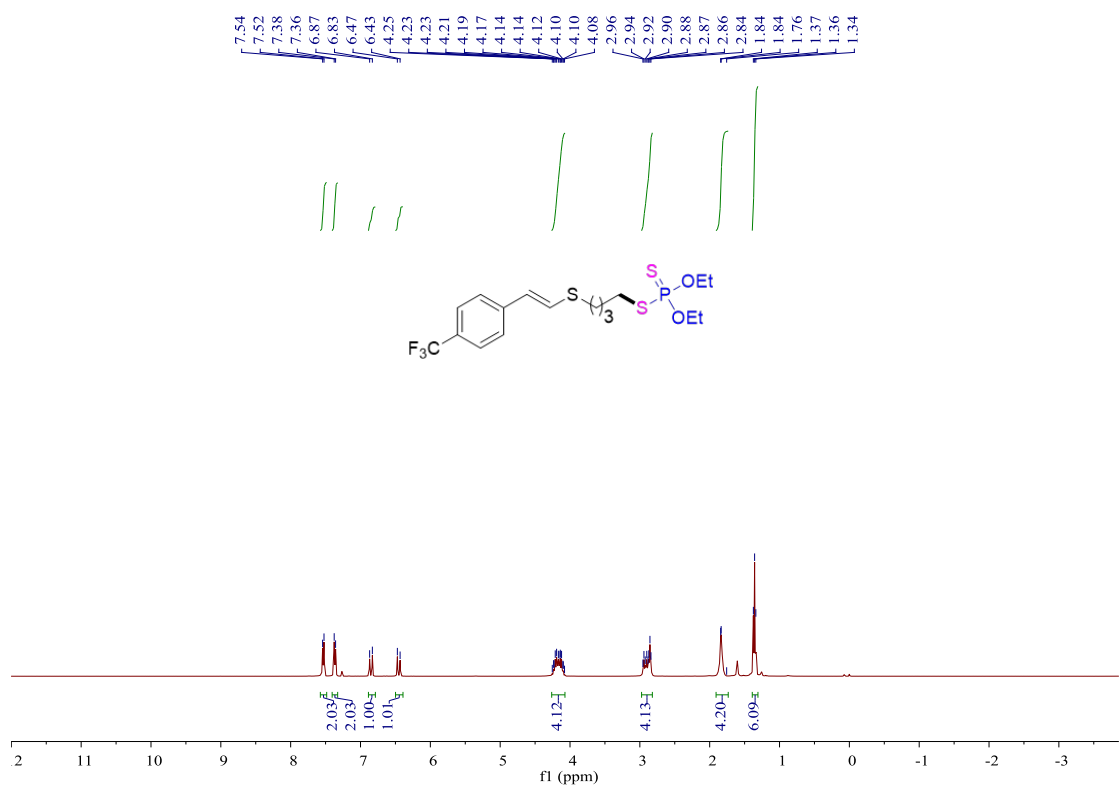

$^1\text{H}$  NMR (400 MHz,  $\text{CDCl}_3$ ) spectra of **9f**

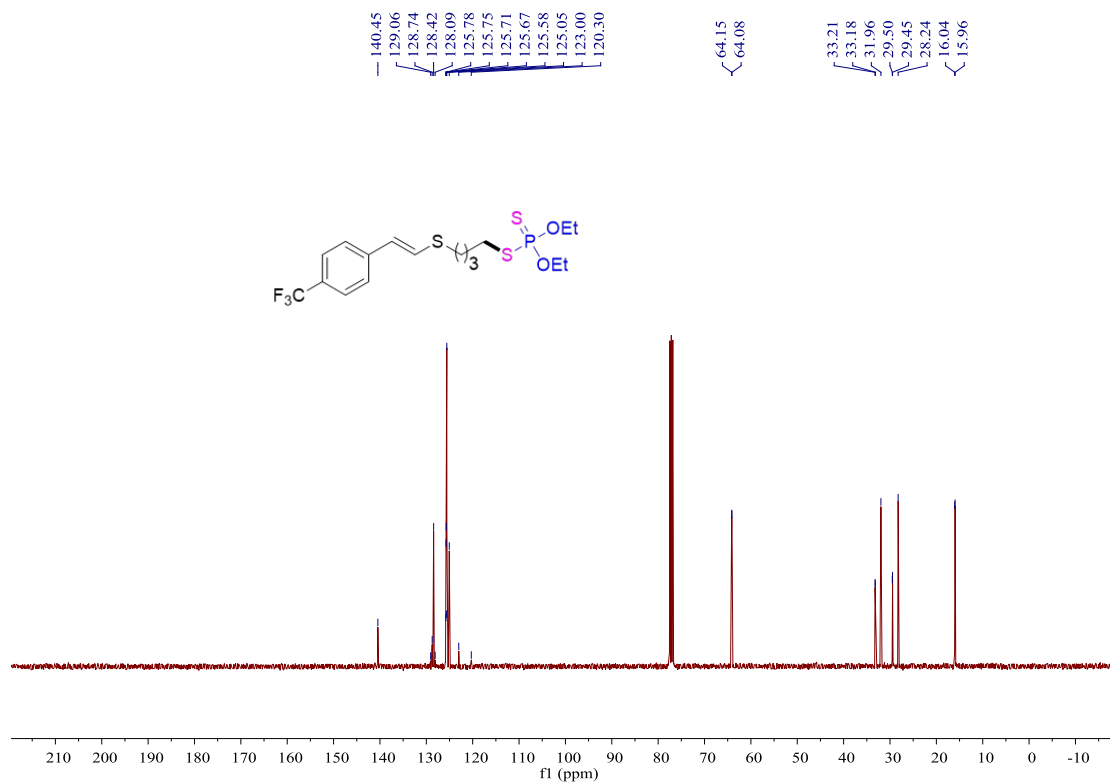

$^{13}\text{C}$  NMR (101 MHz,  $\text{CDCl}_3$ ) spectra of **9f**

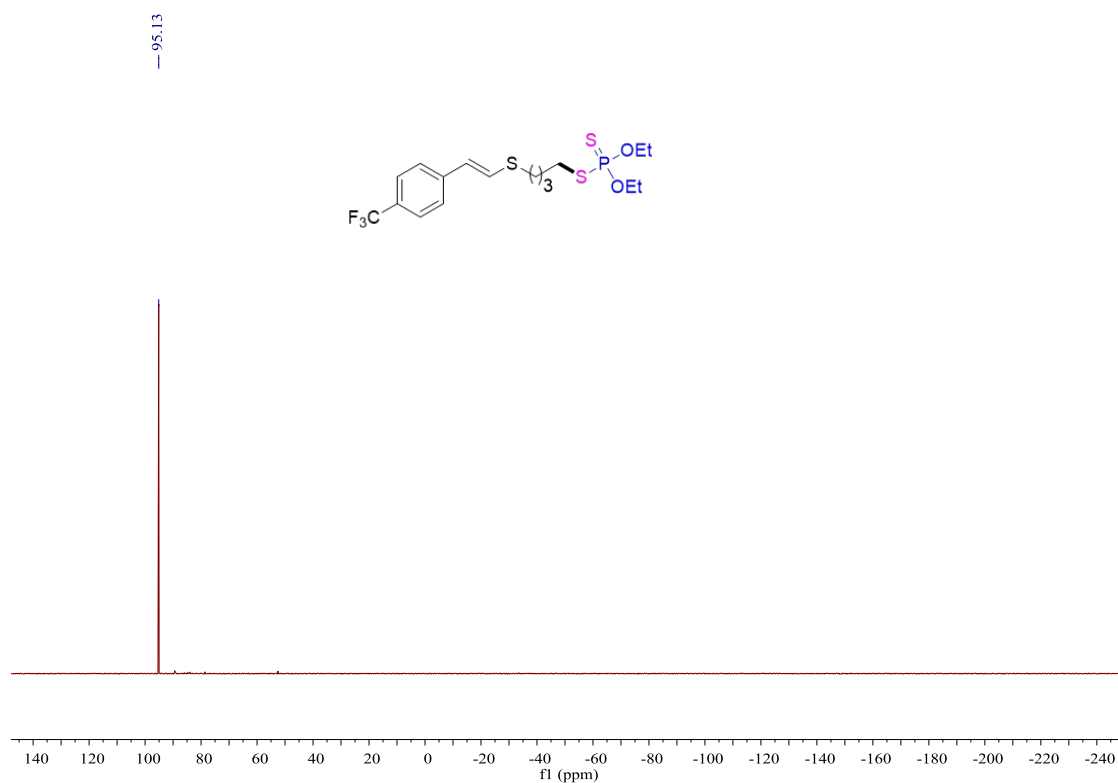

$^{31}\text{P}$  NMR (162 MHz,  $\text{CDCl}_3$ ) spectra of **9f**



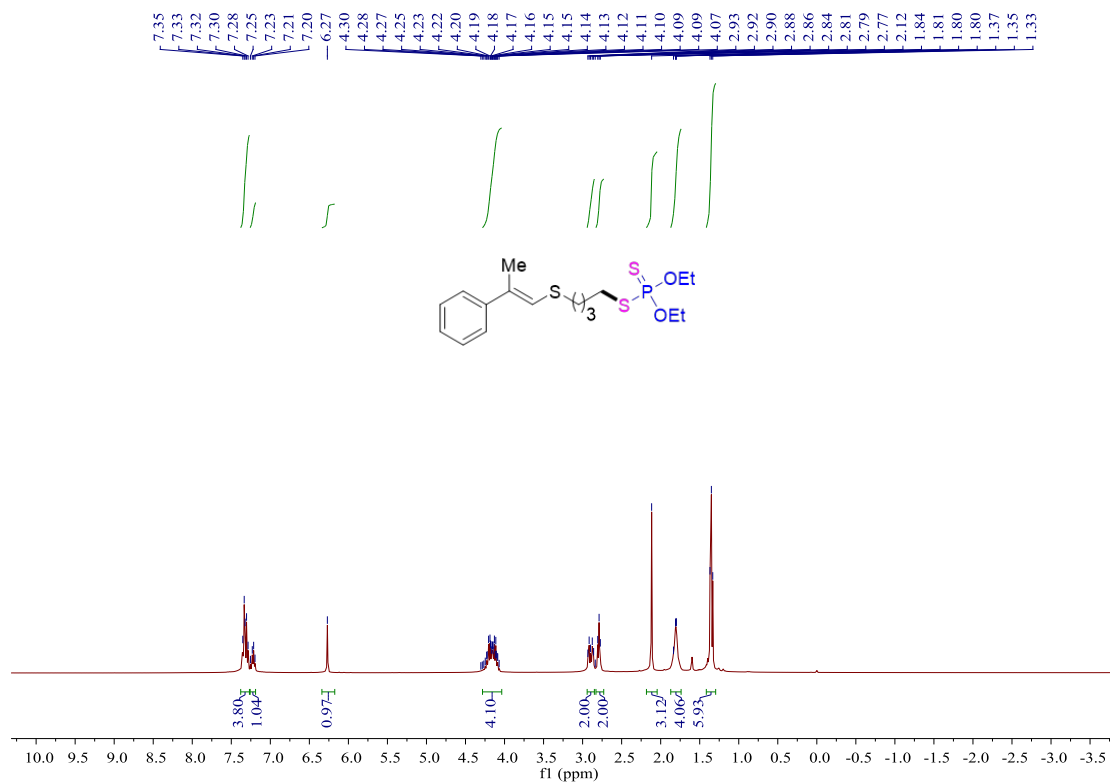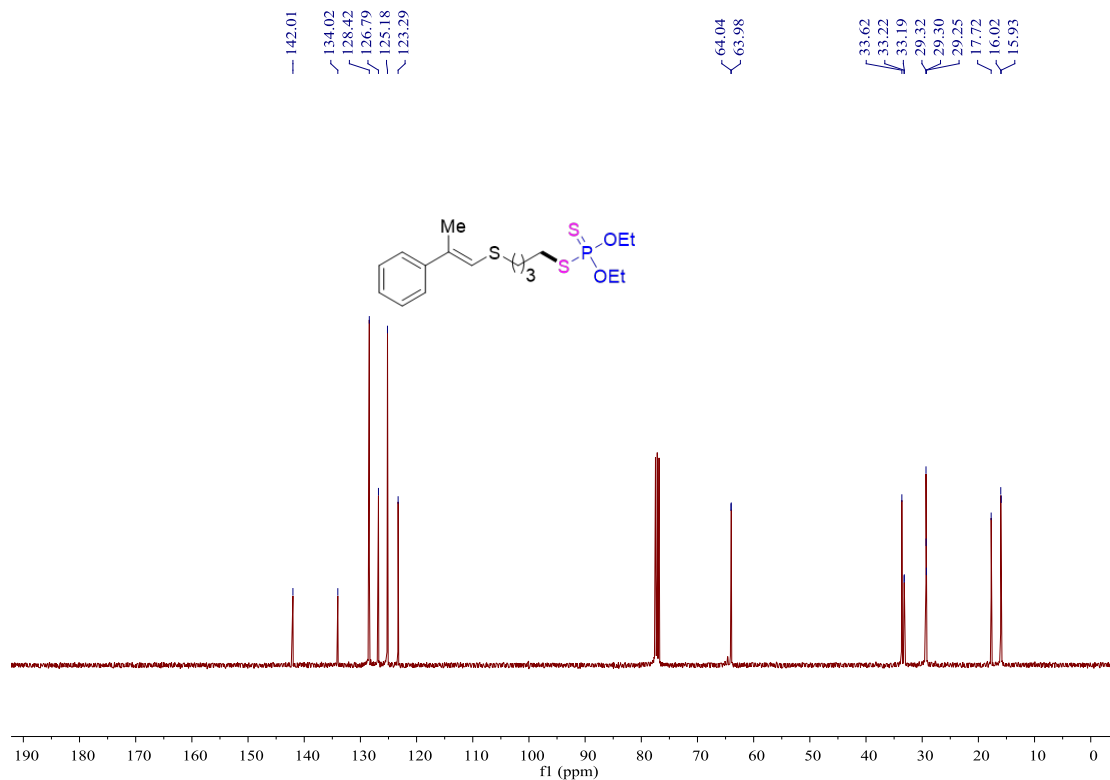

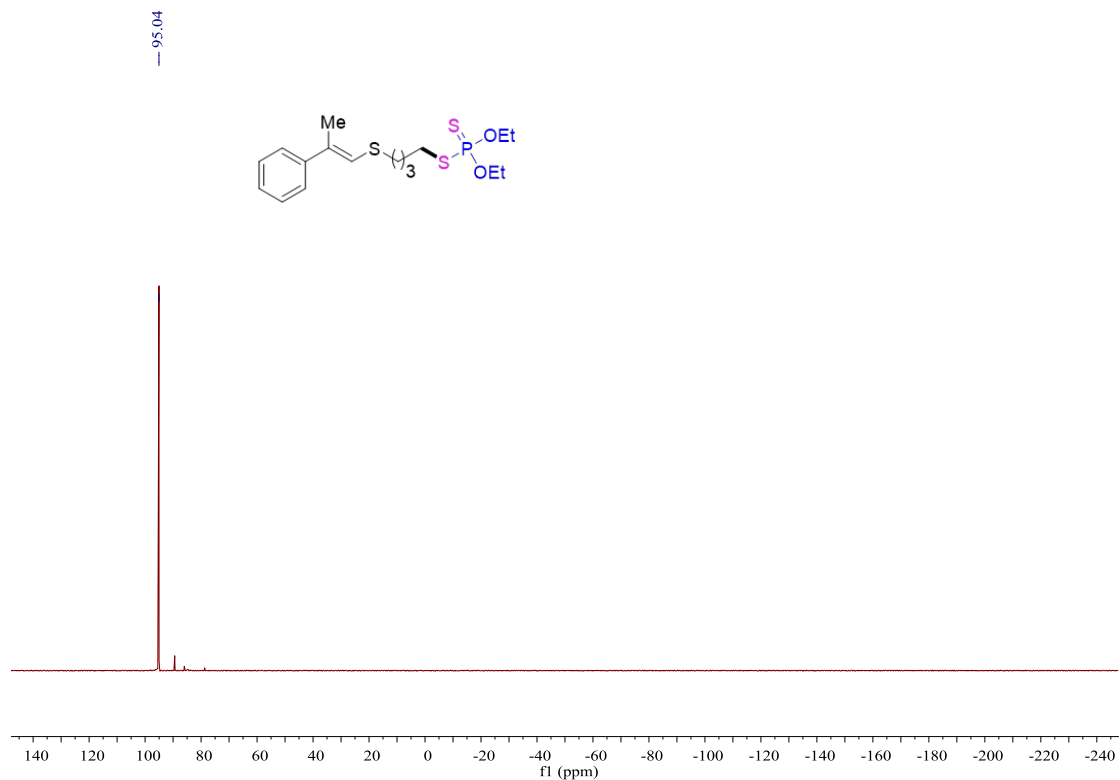

$^{31}\text{P}$  NMR (162 MHz,  $\text{CDCl}_3$ ) spectra of **9g**

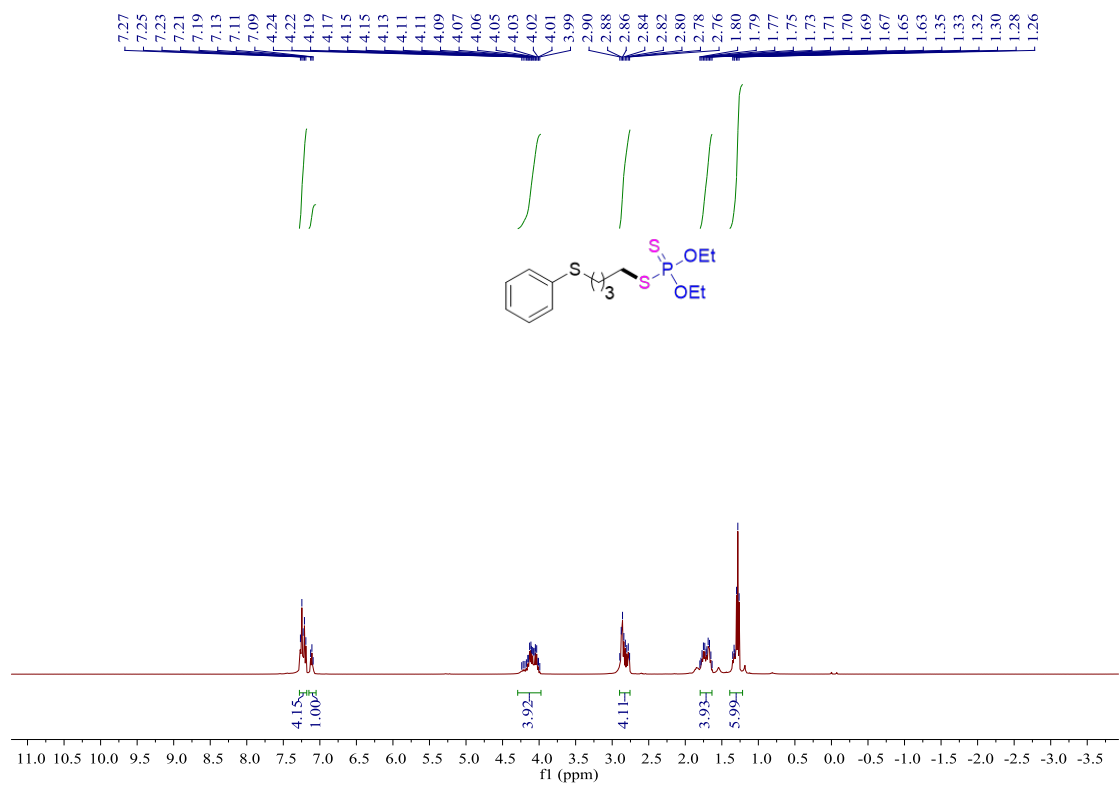

$^1\text{H}$  NMR (400 MHz,  $\text{CDCl}_3$ ) spectra of **9h**

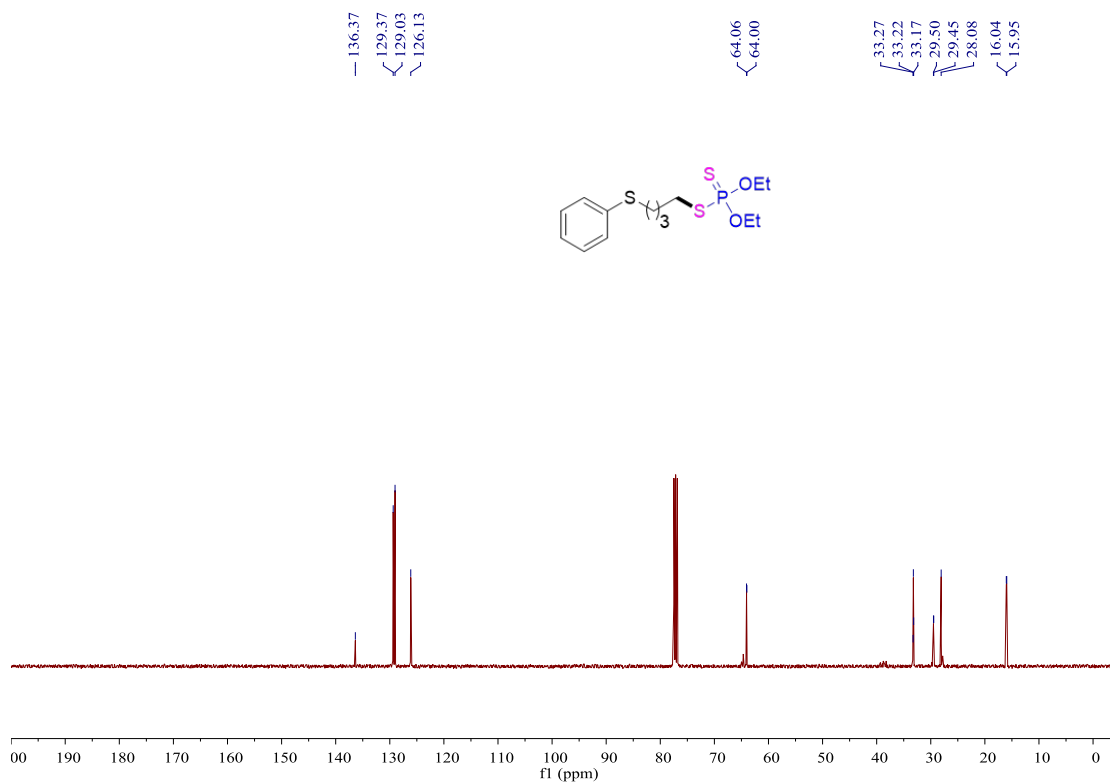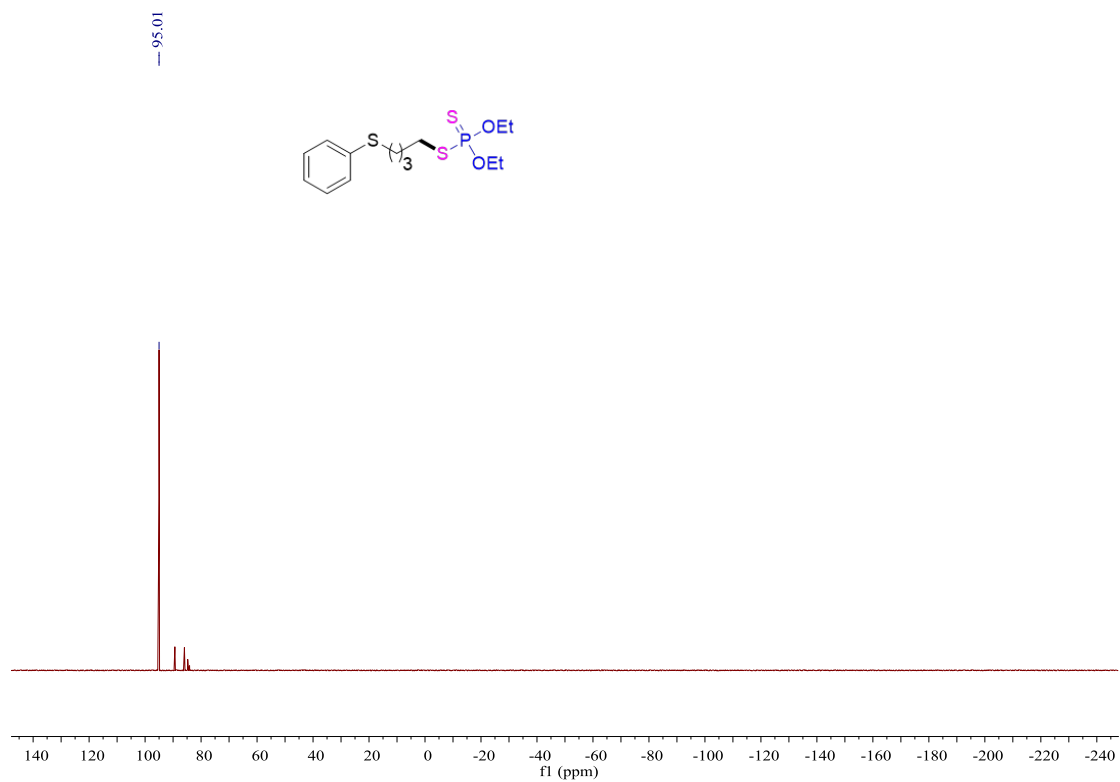

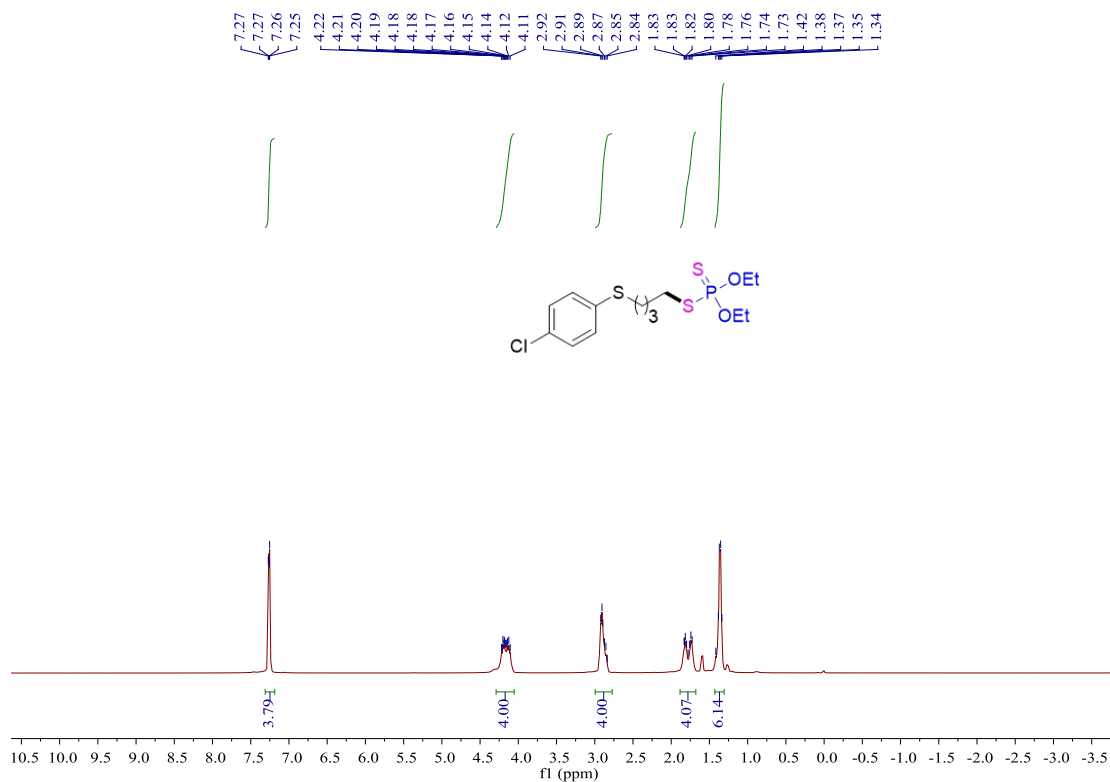

<sup>1</sup>H NMR (400 MHz, CDCl<sub>3</sub>) spectra of **9i**

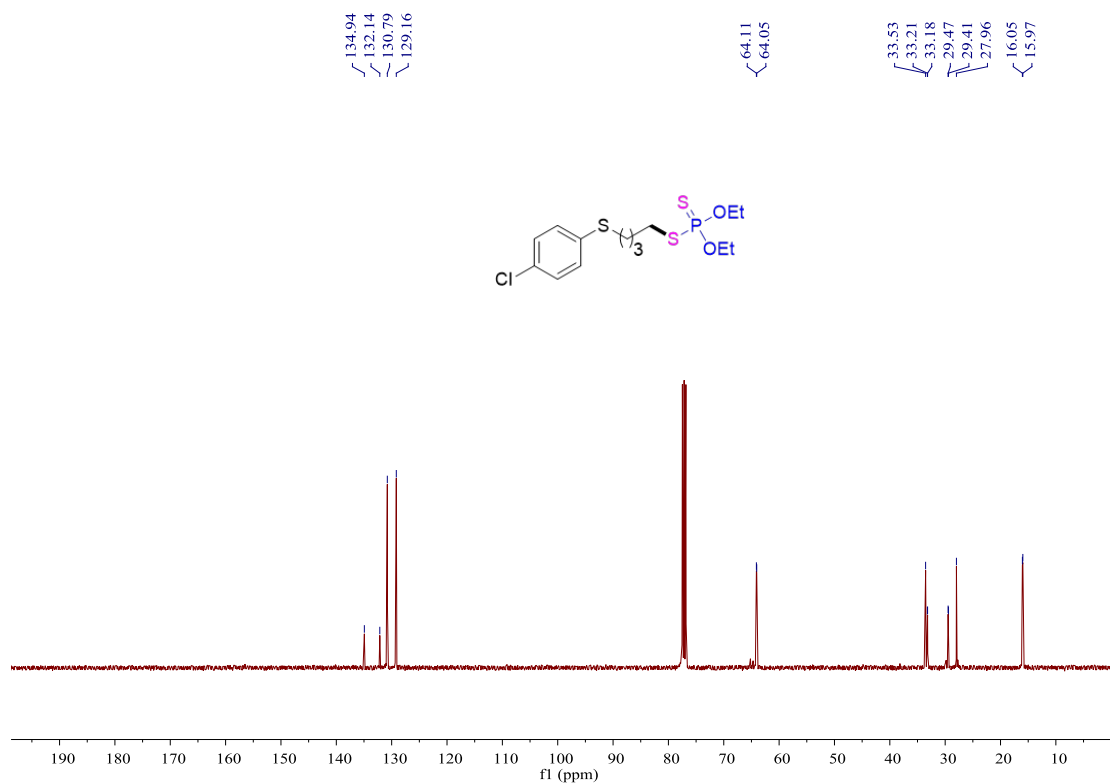

<sup>13</sup>C NMR (101 MHz, CDCl<sub>3</sub>) spectra of **9i**

— 95.10

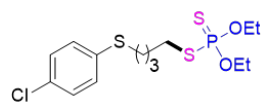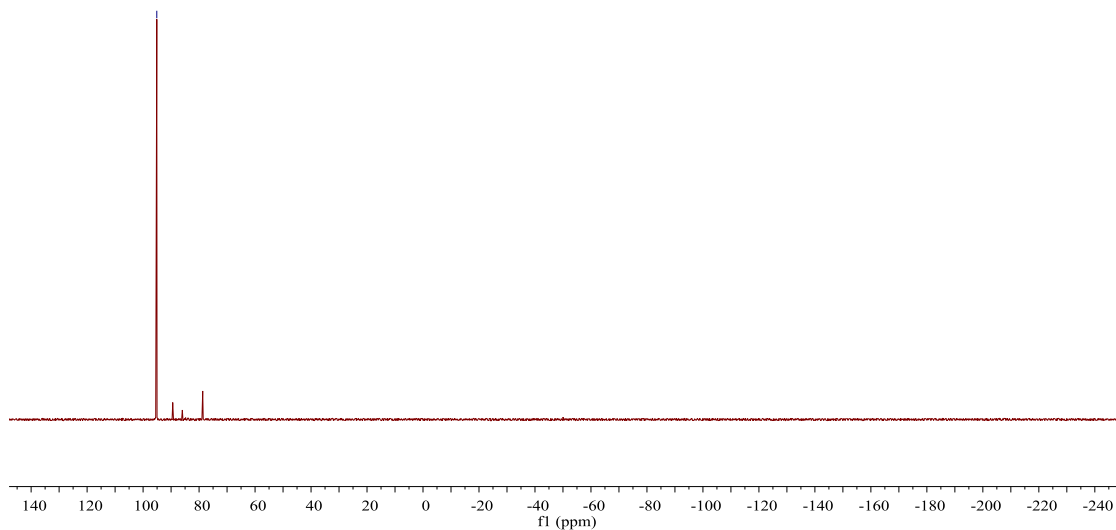

$^{31}\text{P}$  NMR (162 MHz,  $\text{CDCl}_3$ ) spectra of **9i**

7.41  
7.39  
7.19  
7.18  
7.17  
4.31  
4.29  
4.27  
4.25  
4.23  
4.22  
4.20  
4.18  
4.16  
4.16  
4.15  
4.13  
4.12  
4.11  
4.09  
4.06  
2.93  
2.91  
2.89  
2.88  
2.85  
2.84  
1.83  
1.82  
1.80  
1.78  
1.76  
1.75  
1.73  
1.71  
1.69  
1.40  
1.37  
1.36  
1.34

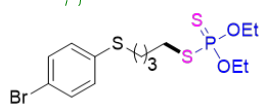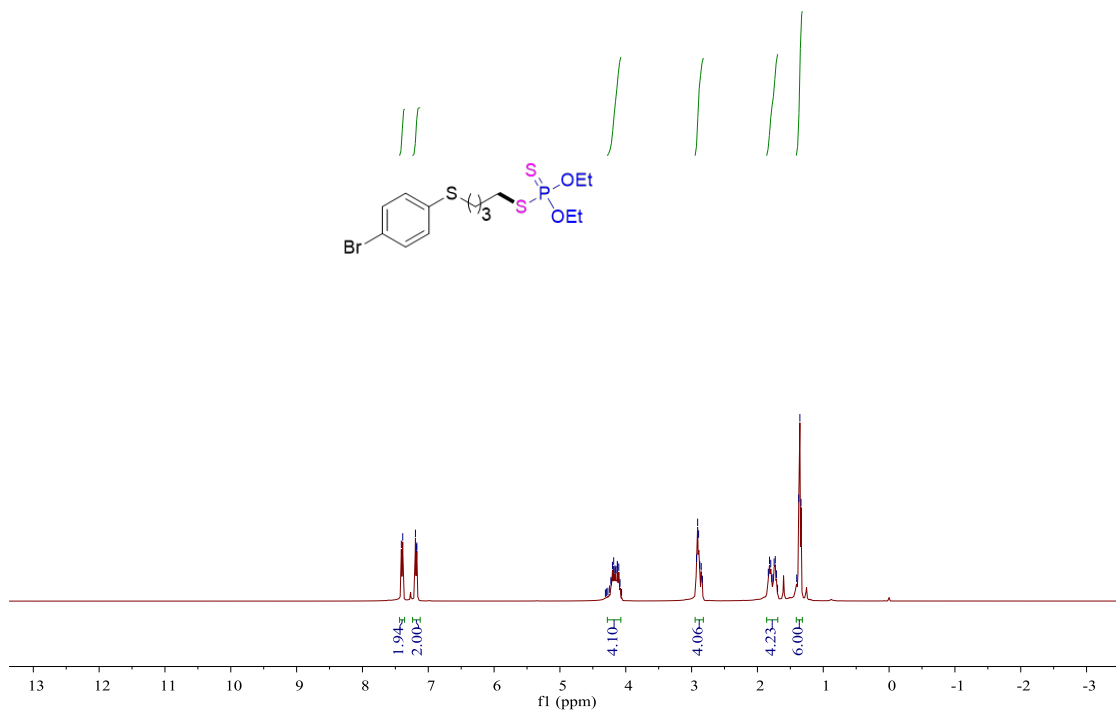

$^1\text{H}$  NMR (400 MHz,  $\text{CDCl}_3$ ) spectra of **9j**

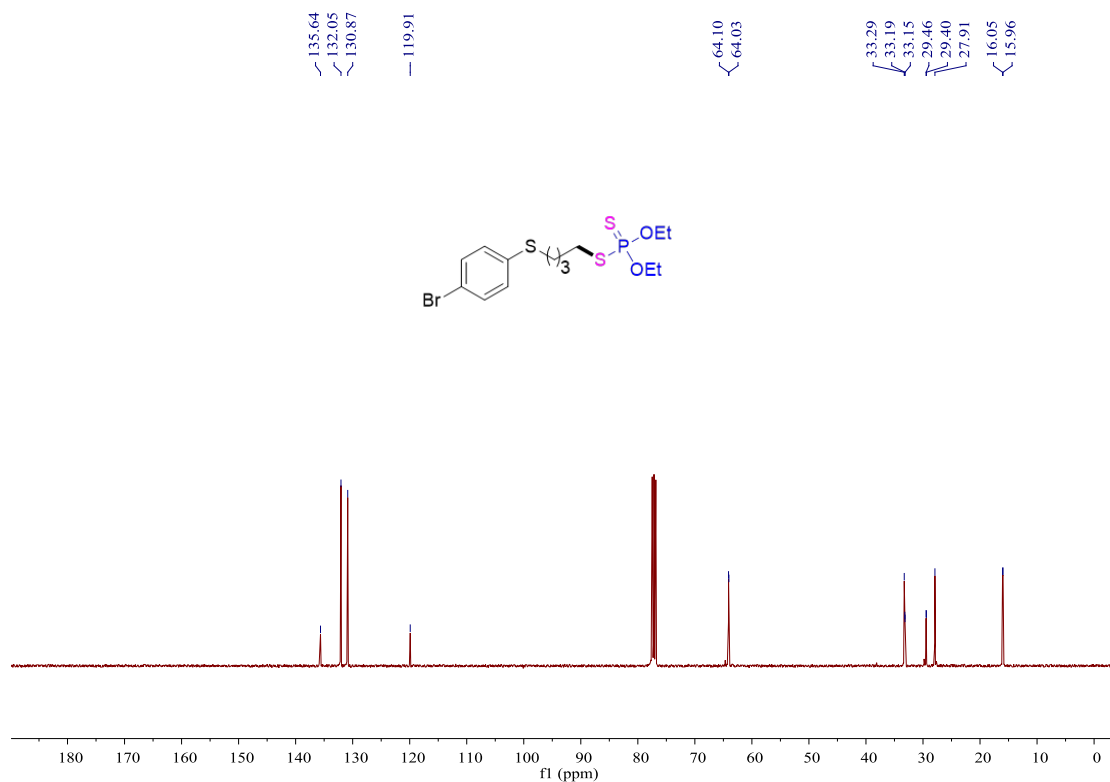

$^{13}\text{C}$  NMR (101 MHz,  $\text{CDCl}_3$ ) spectra of **9j**

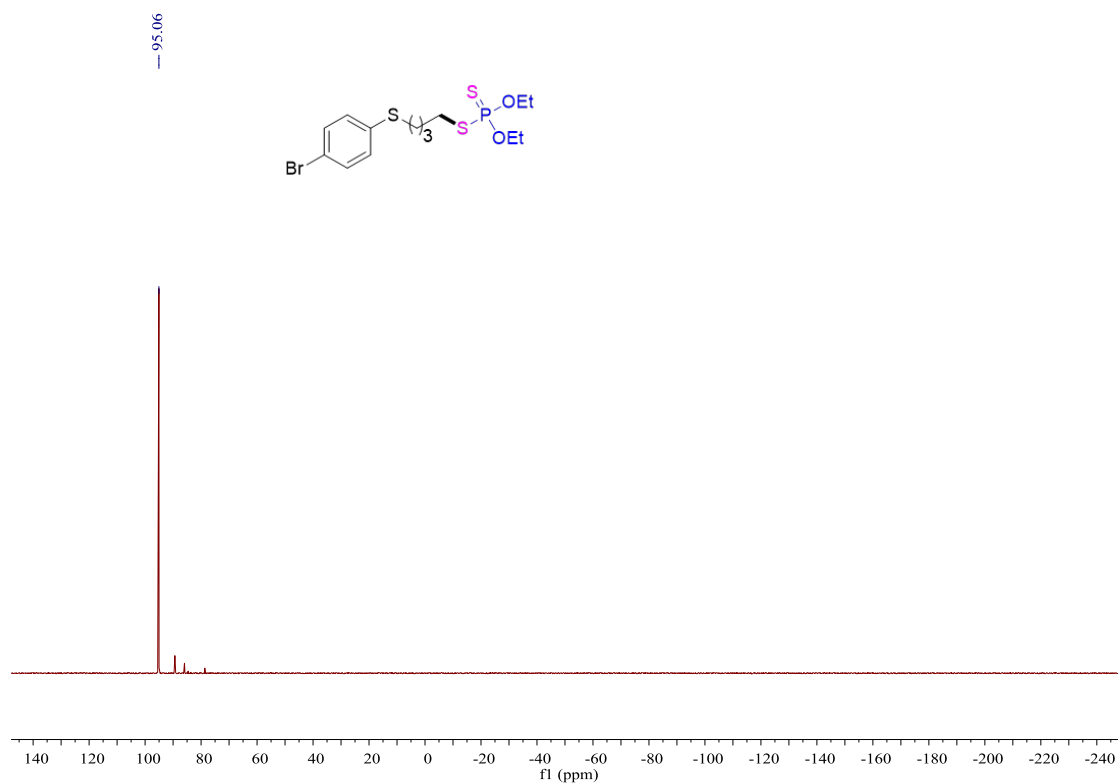

$^{31}\text{P}$  NMR (162 MHz,  $\text{CDCl}_3$ ) spectra of **9j**

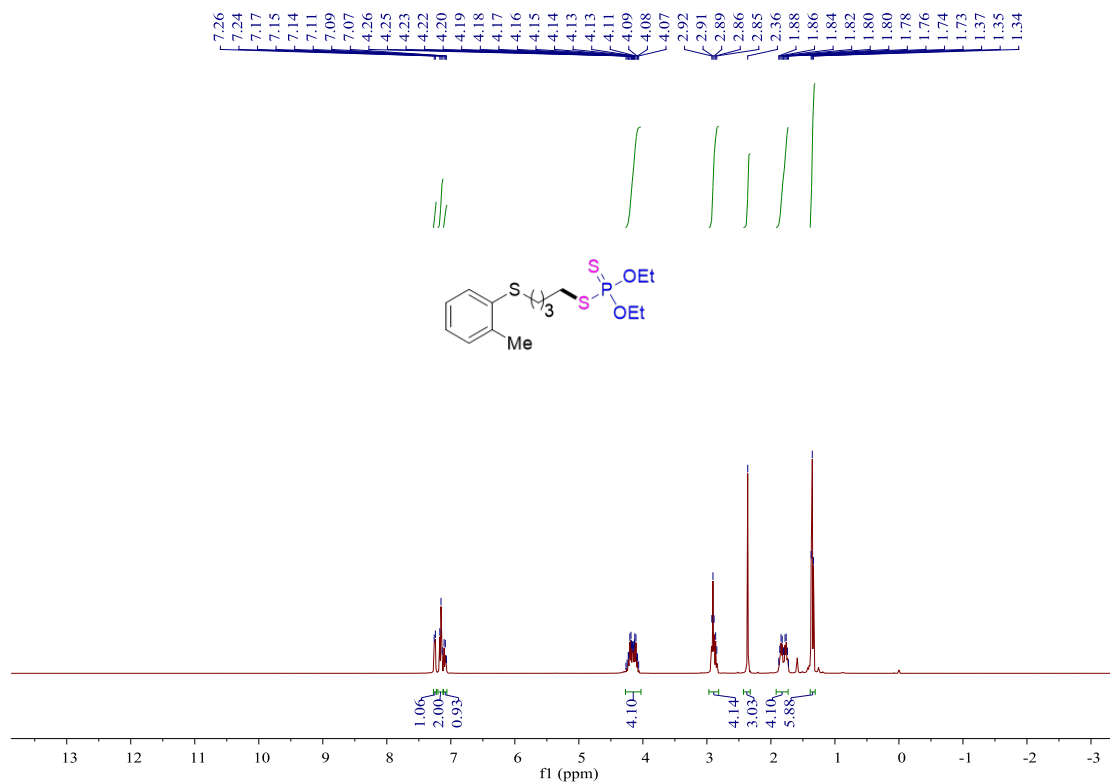

<sup>1</sup>H NMR (400 MHz, CDCl<sub>3</sub>) spectra of **9k**

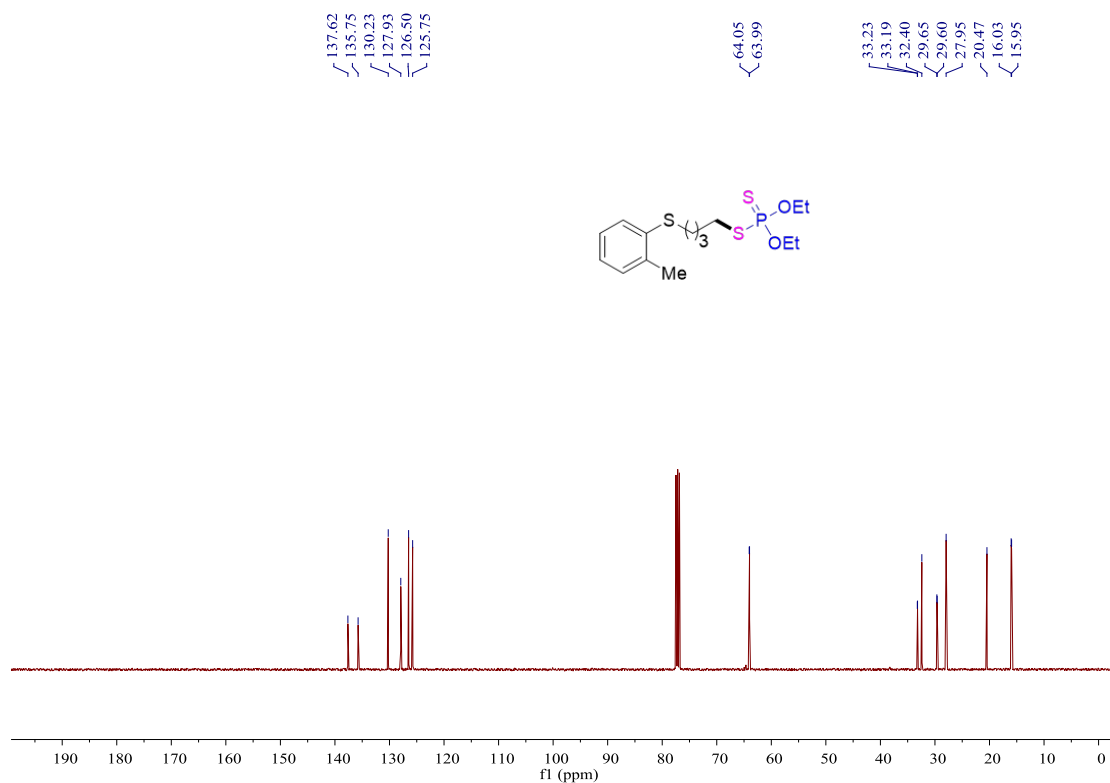

<sup>13</sup>C NMR (101 MHz, CDCl<sub>3</sub>) spectra of **9k**

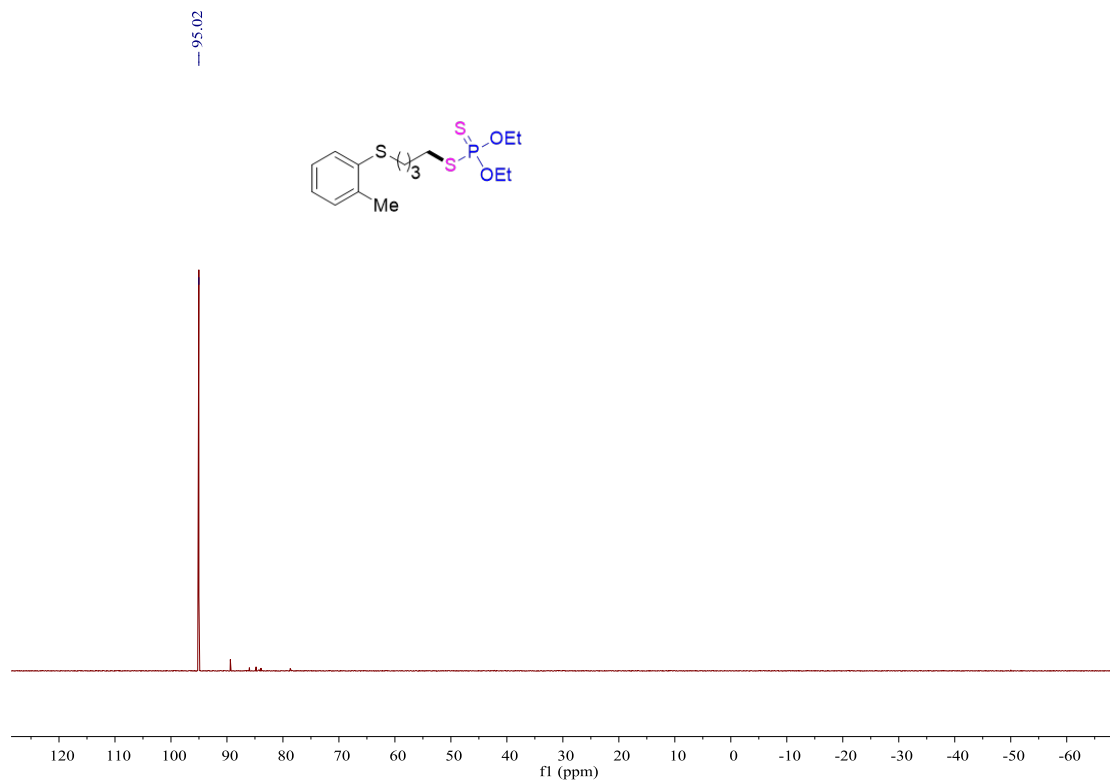

<sup>31</sup>P NMR (162 MHz, CDCl<sub>3</sub>) spectra of **9k**

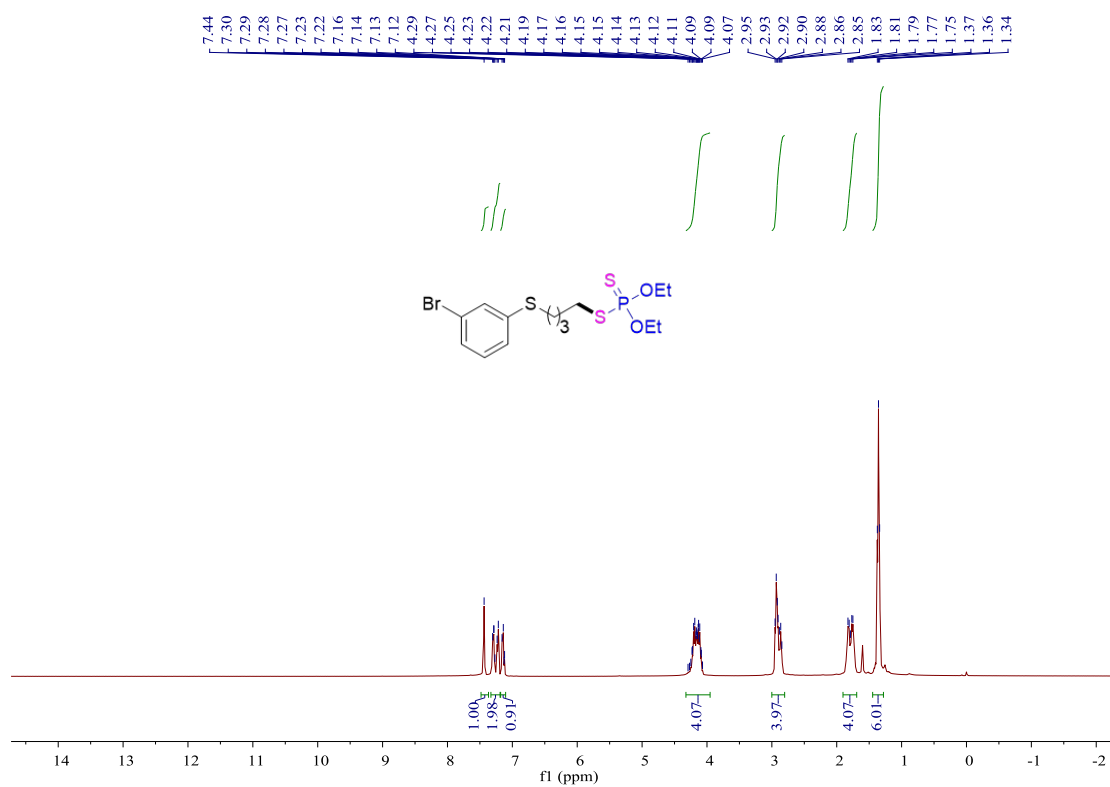

<sup>1</sup>H NMR (400 MHz, CDCl<sub>3</sub>) spectra of **9l**



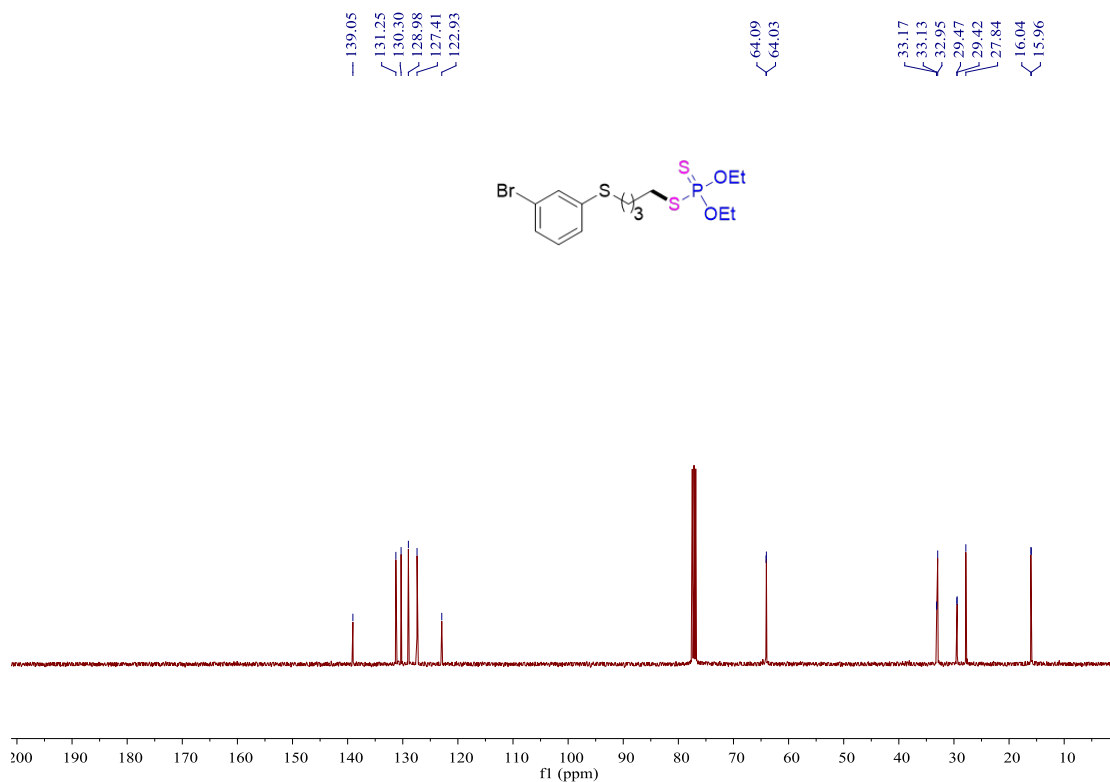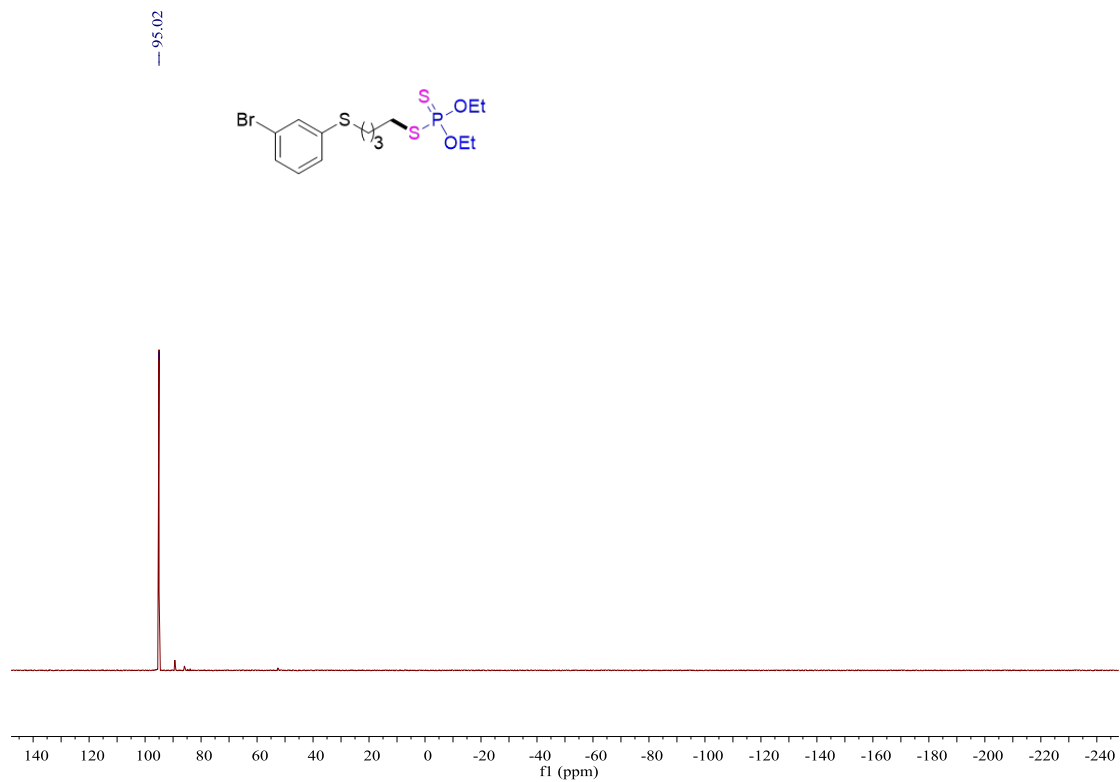

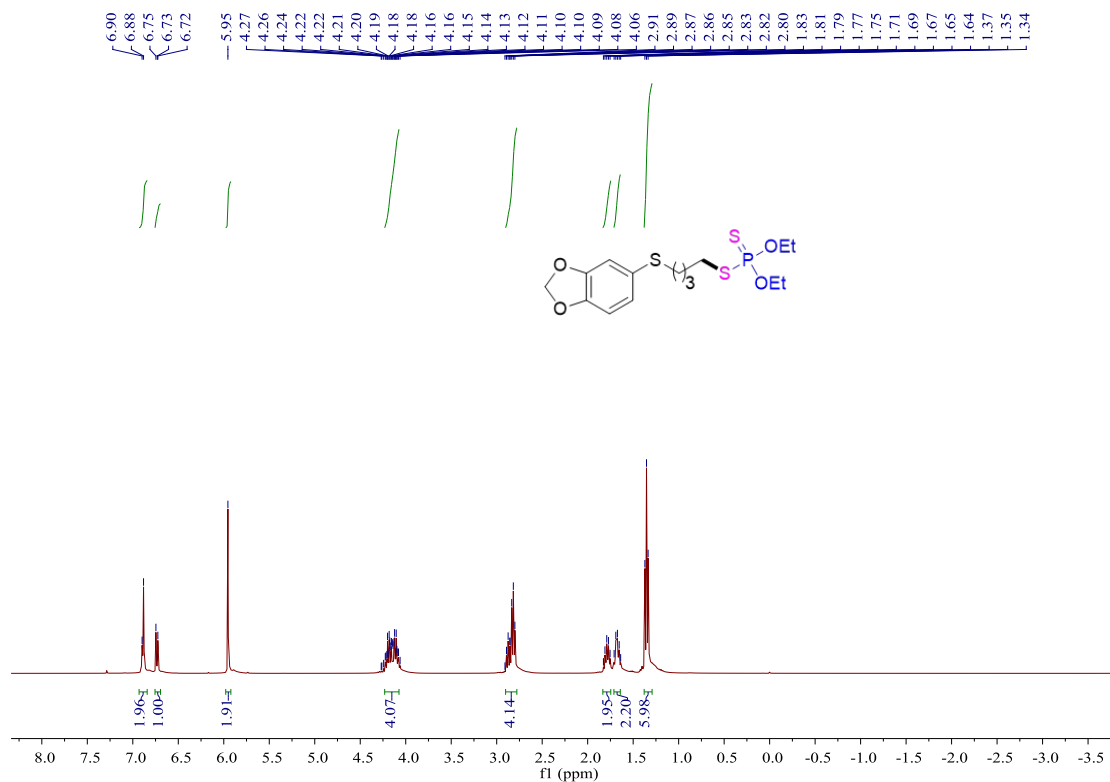

<sup>1</sup>H NMR (400 MHz, CDCl<sub>3</sub>) spectra of **9m**

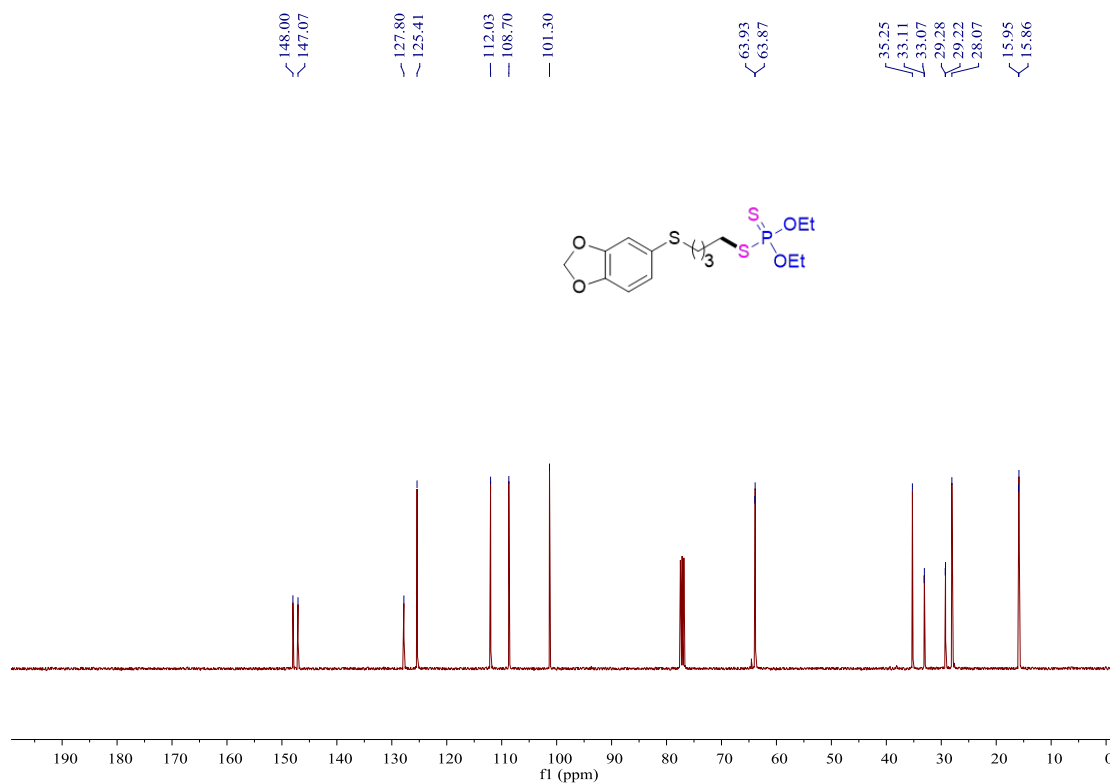

<sup>13</sup>C NMR (101 MHz, CDCl<sub>3</sub>) spectra of **9m**

— 94.98

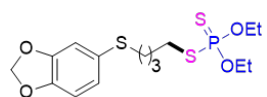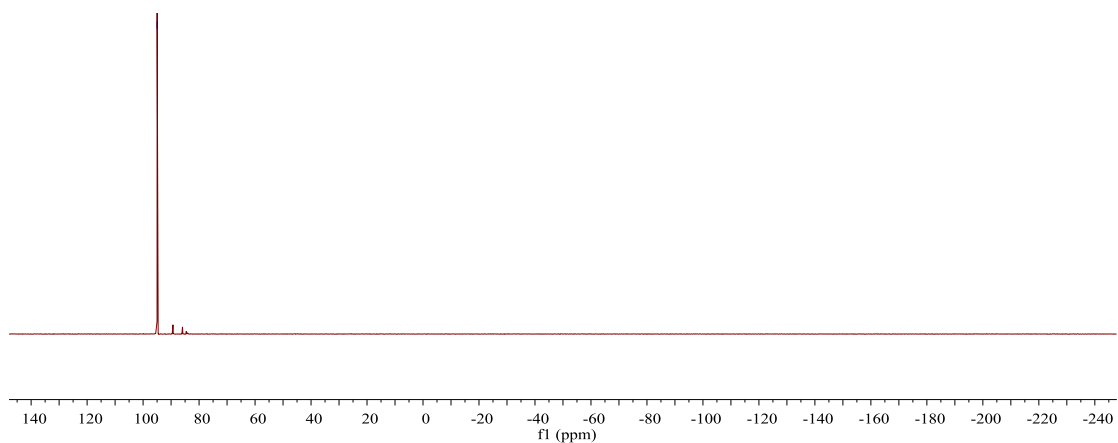

$^{31}\text{P}$  NMR (162 MHz,  $\text{CDCl}_3$ ) spectra of **9m**

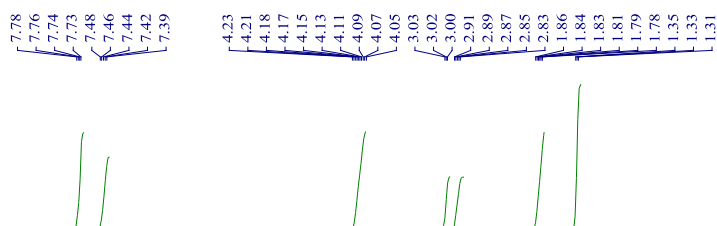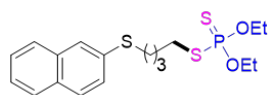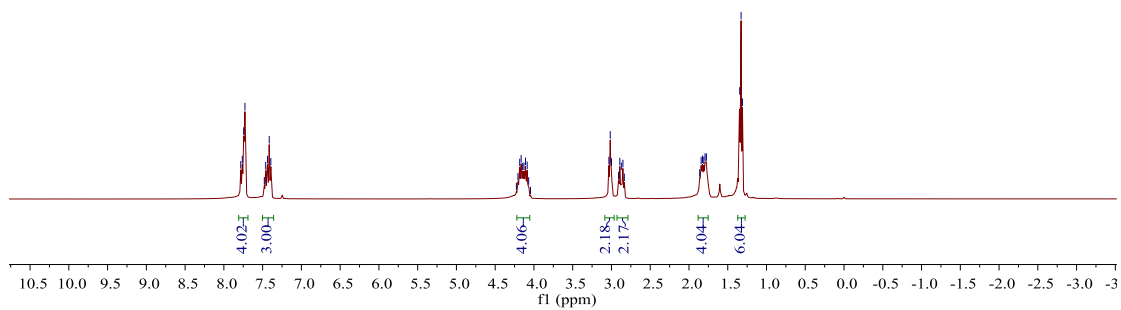

$^1\text{H}$  NMR (400 MHz,  $\text{CDCl}_3$ ) spectra of **9n**

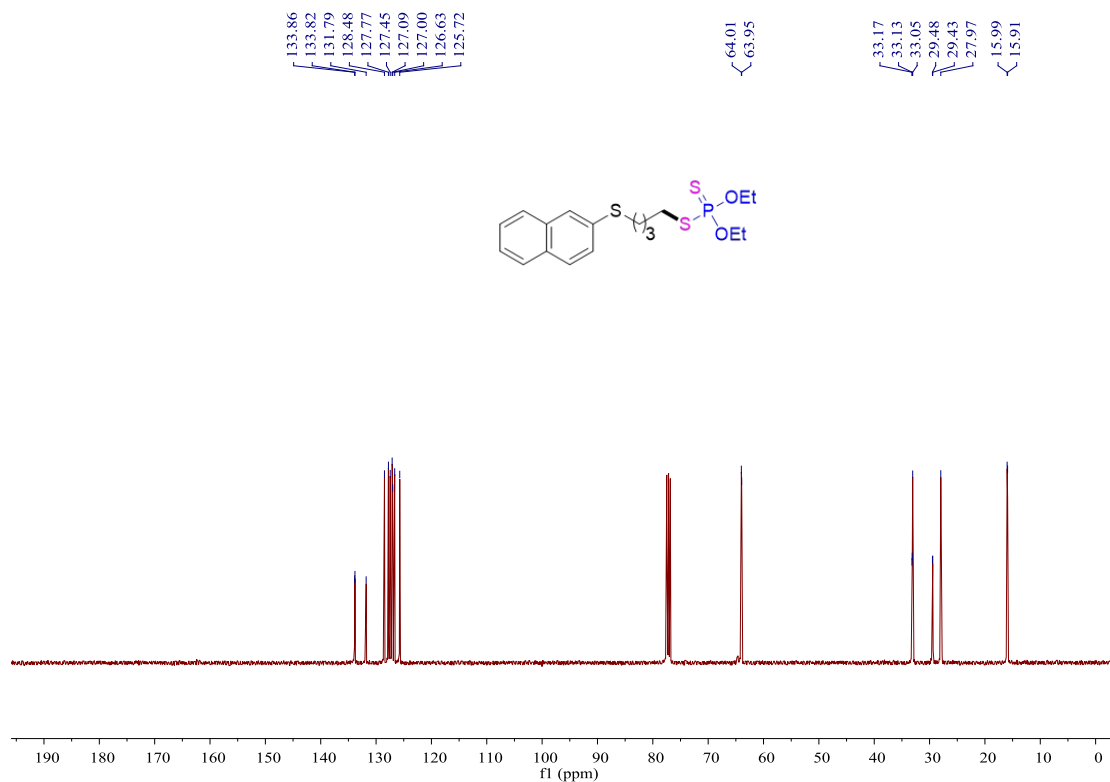

<sup>13</sup>C NMR (101 MHz, CDCl<sub>3</sub>) spectra of **9n**

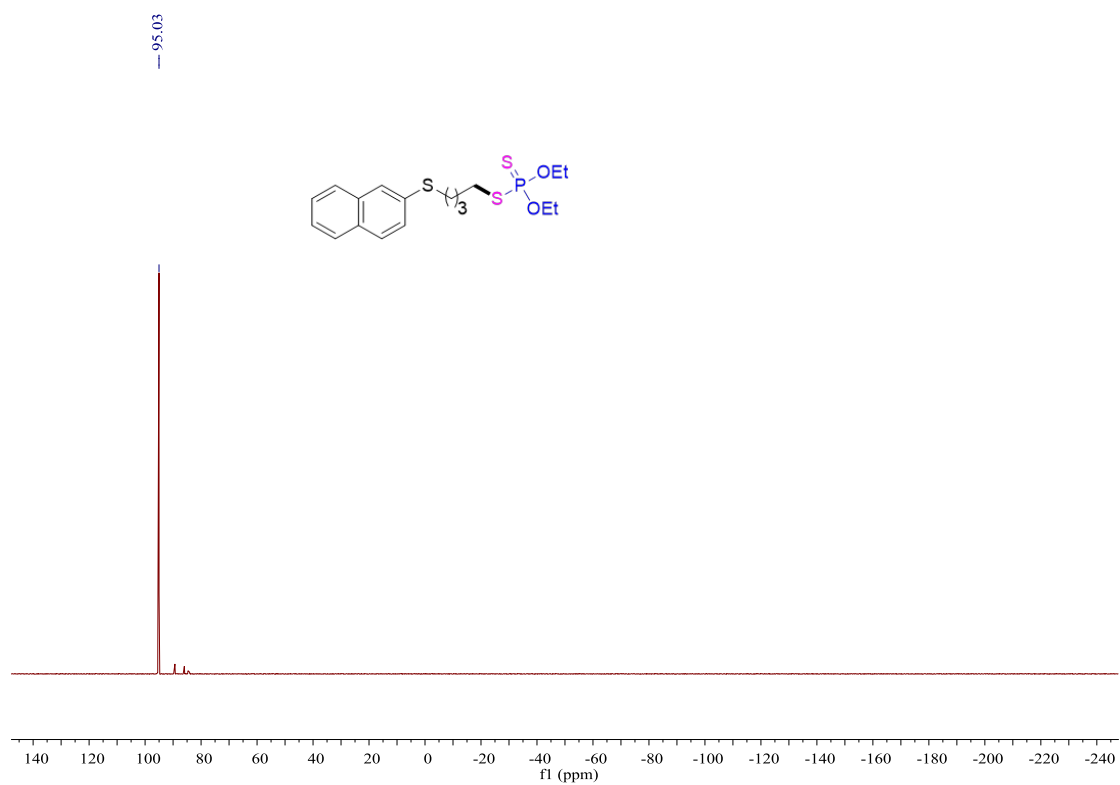

<sup>31</sup>P NMR (162 MHz, CDCl<sub>3</sub>) spectra of **9n**

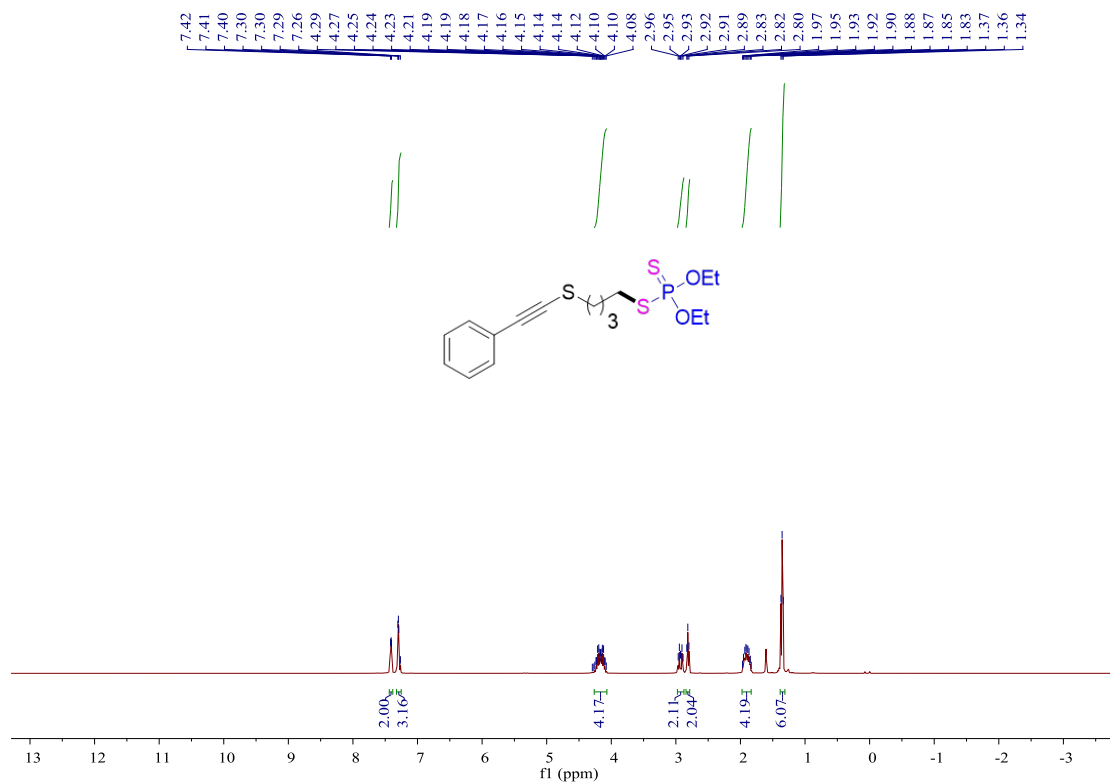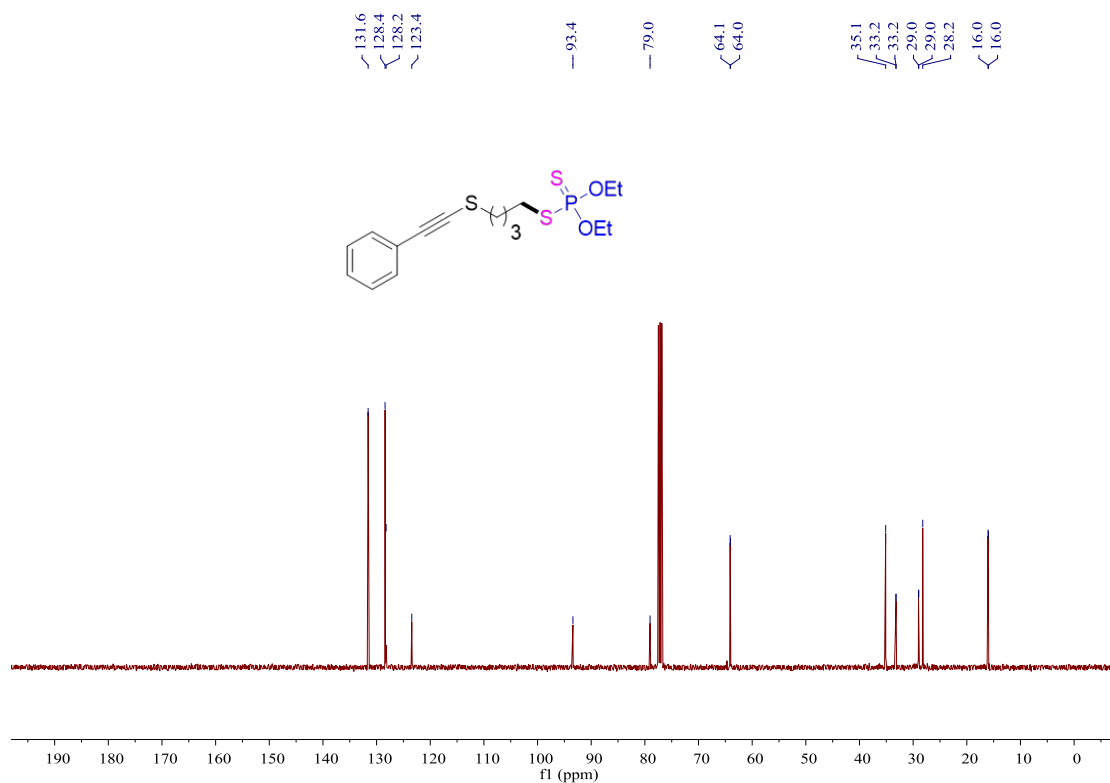

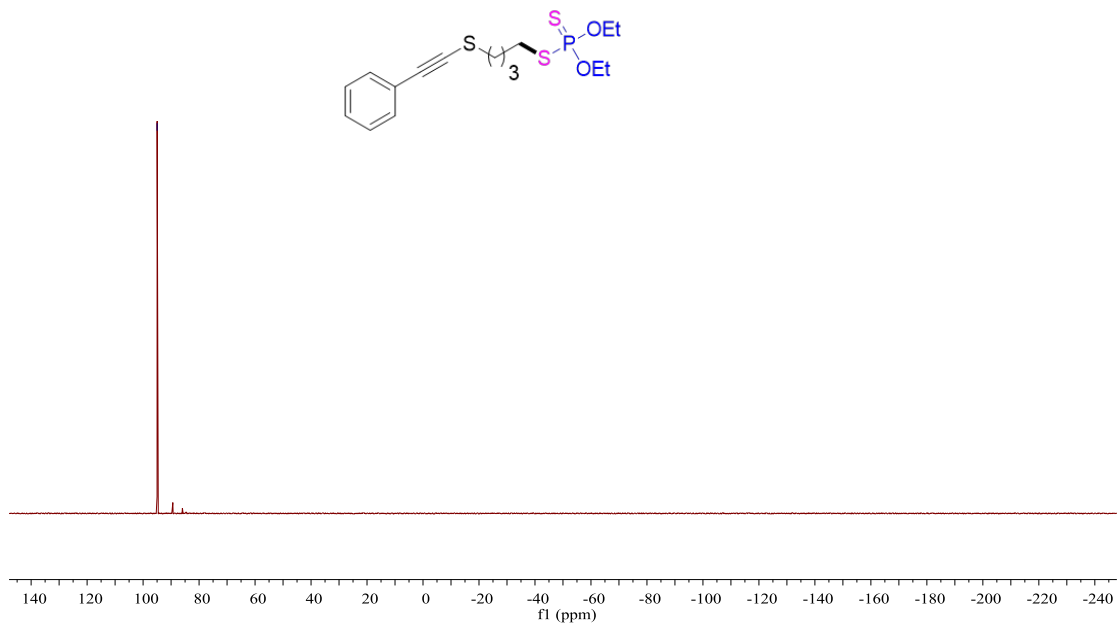

<sup>31</sup>P NMR (162 MHz, CDCl<sub>3</sub>) spectra of **9o**

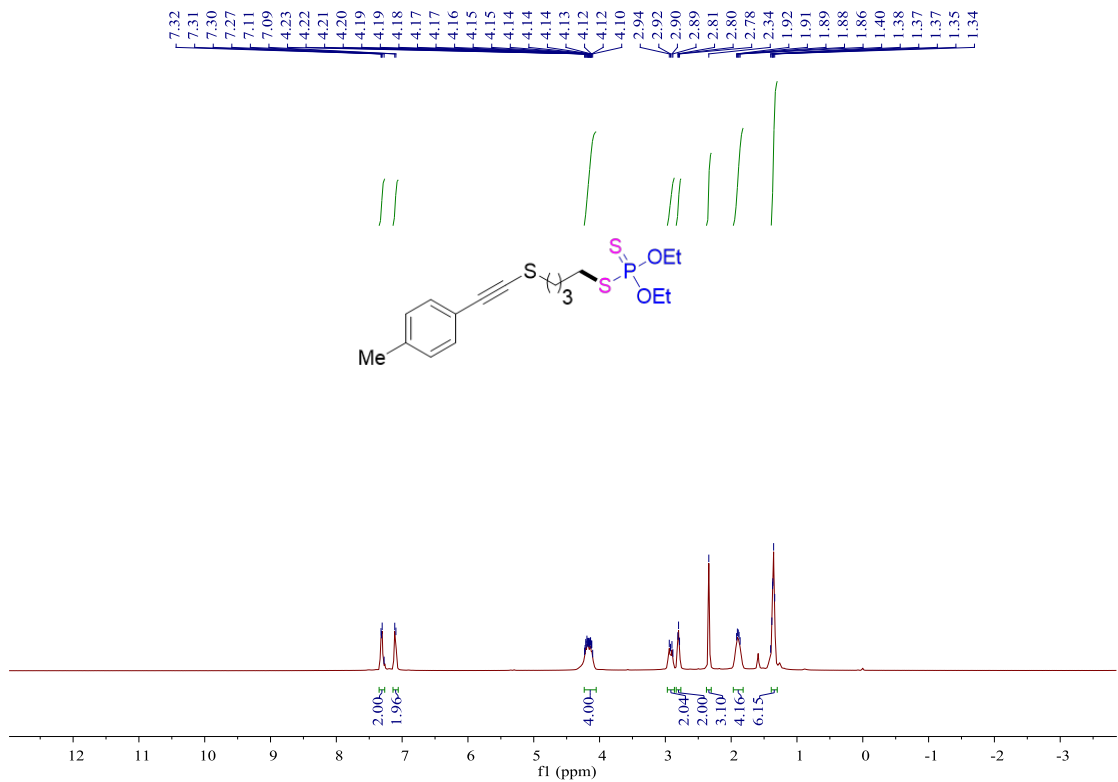

<sup>1</sup>H NMR (400 MHz, CDCl<sub>3</sub>) spectra of **9p**

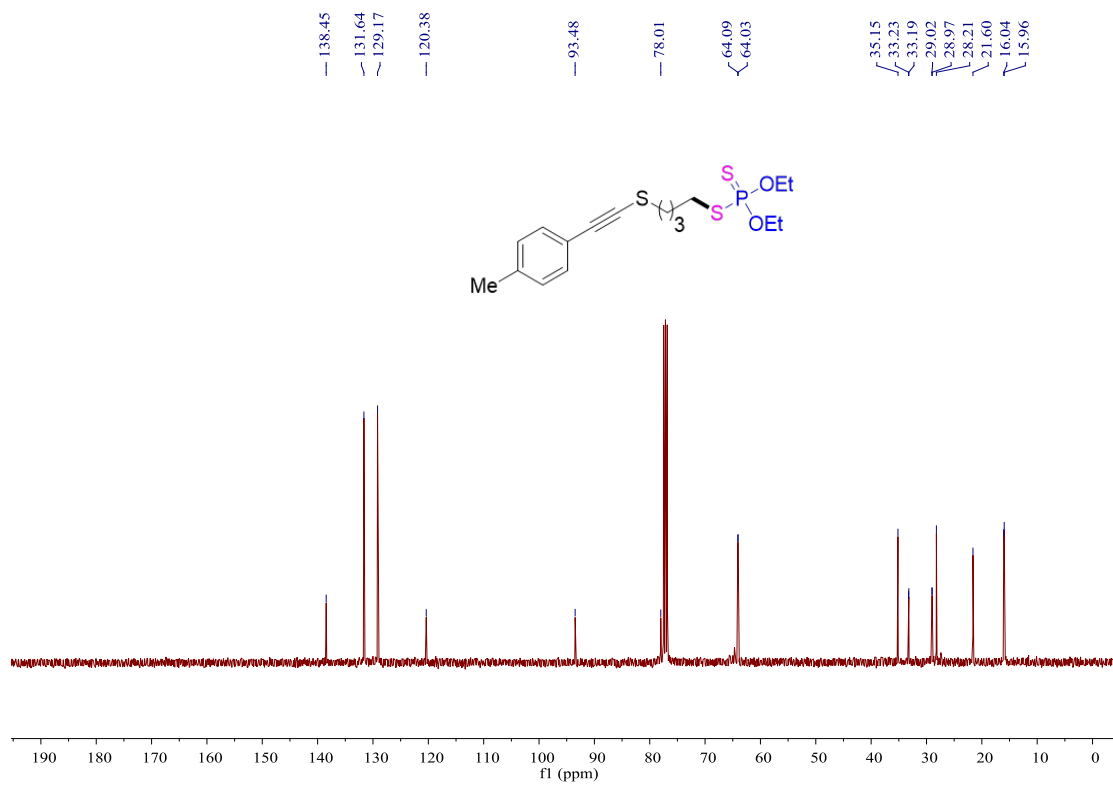

$^{13}\text{C}$  NMR (101 MHz,  $\text{CDCl}_3$ ) spectra of **9p**

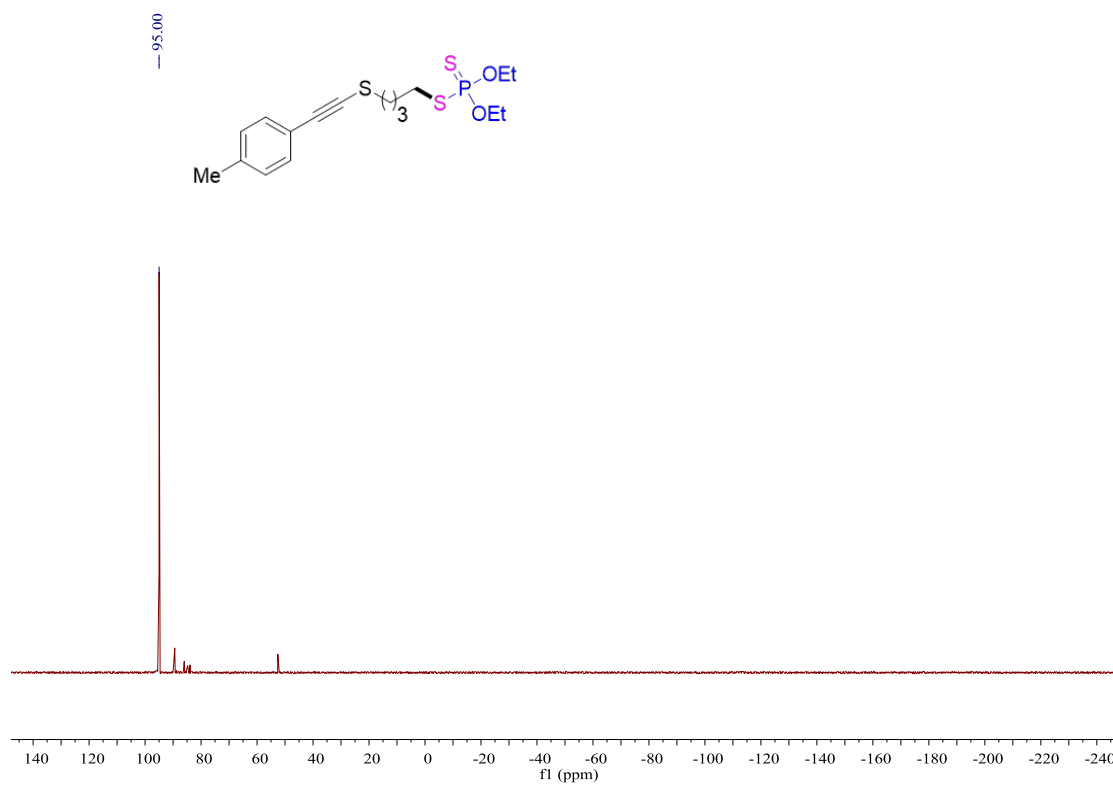

$^{31}\text{P}$  NMR (162 MHz,  $\text{CDCl}_3$ ) spectra of **9p**

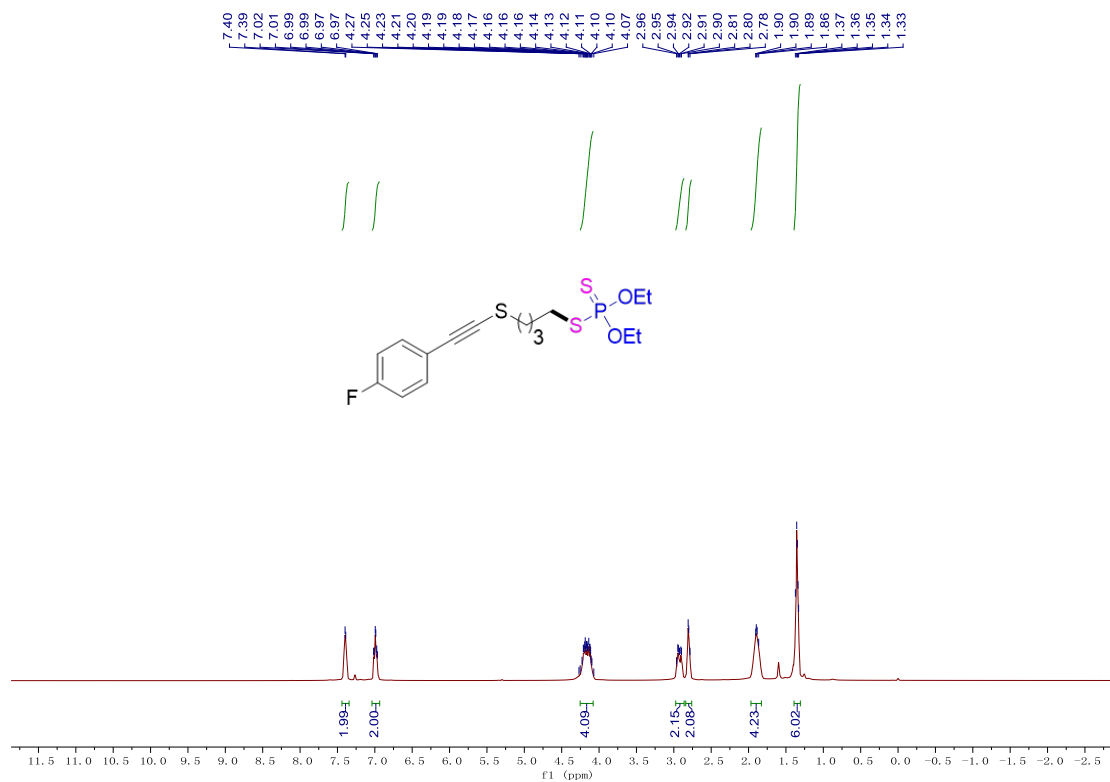

<sup>1</sup>H NMR (400 MHz, CDCl<sub>3</sub>) spectra of **9q**

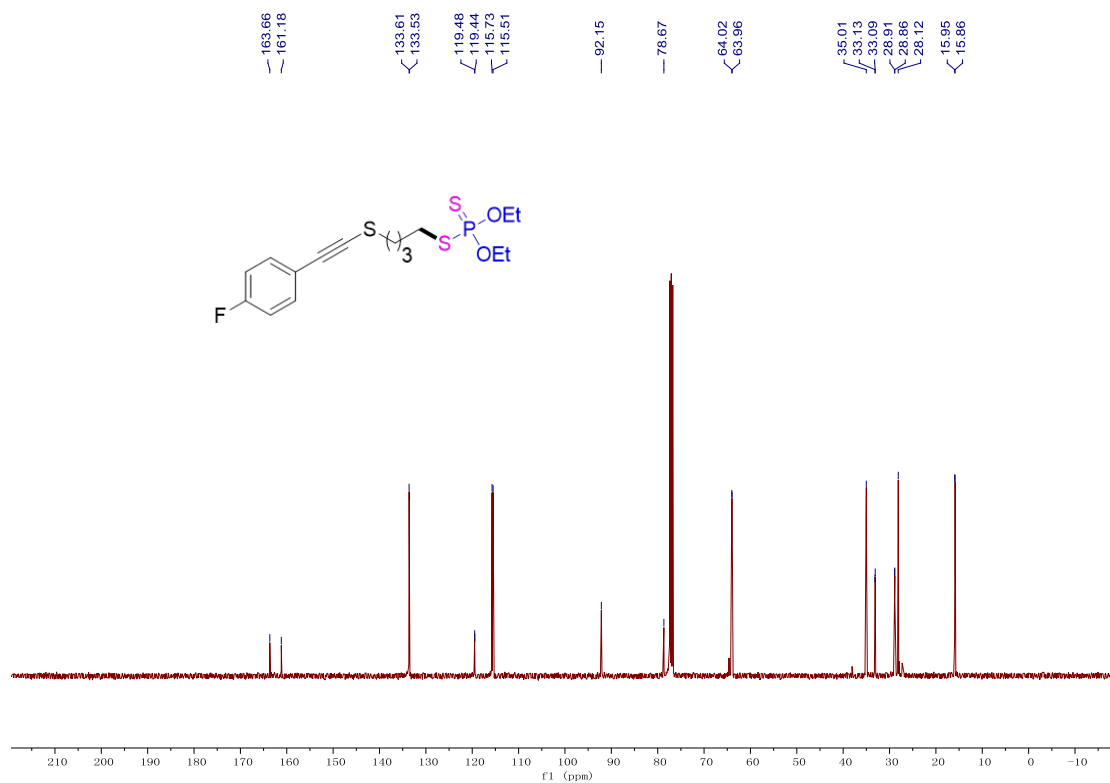

<sup>13</sup>C NMR (101 MHz, CDCl<sub>3</sub>) spectra of **9q**



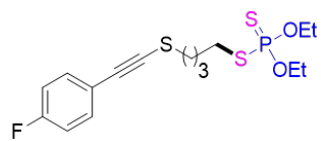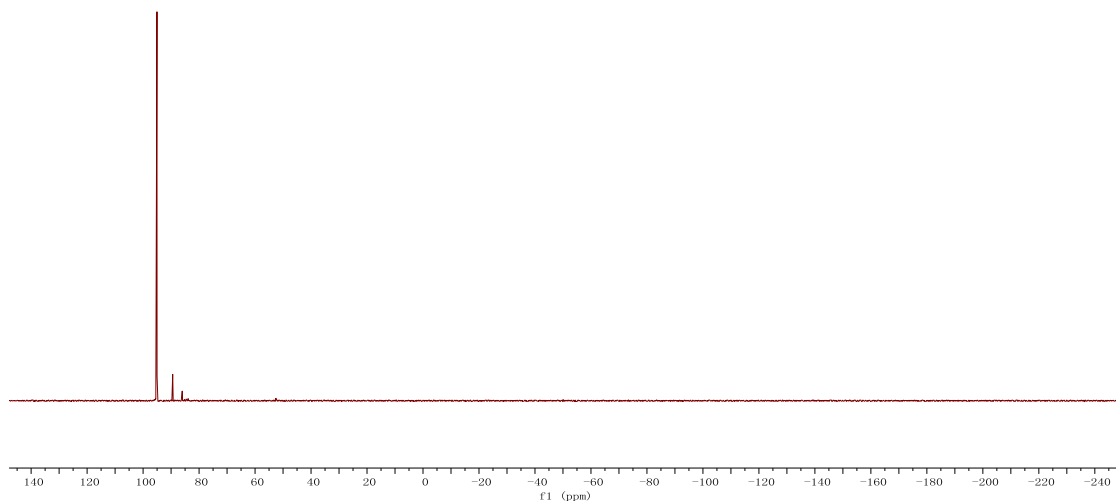

$^{31}\text{P}$  NMR (162 MHz,  $\text{CDCl}_3$ ) spectra of **9q**

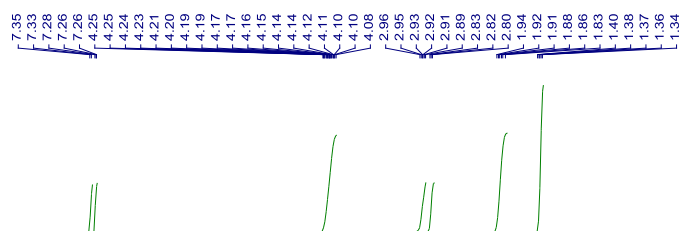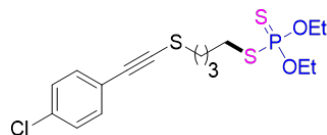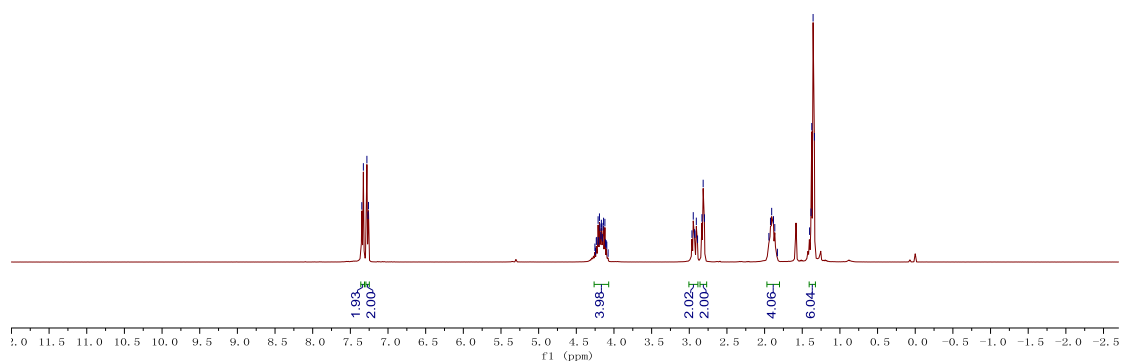

$^1\text{H}$  NMR (400 MHz,  $\text{CDCl}_3$ ) spectra of **9r**

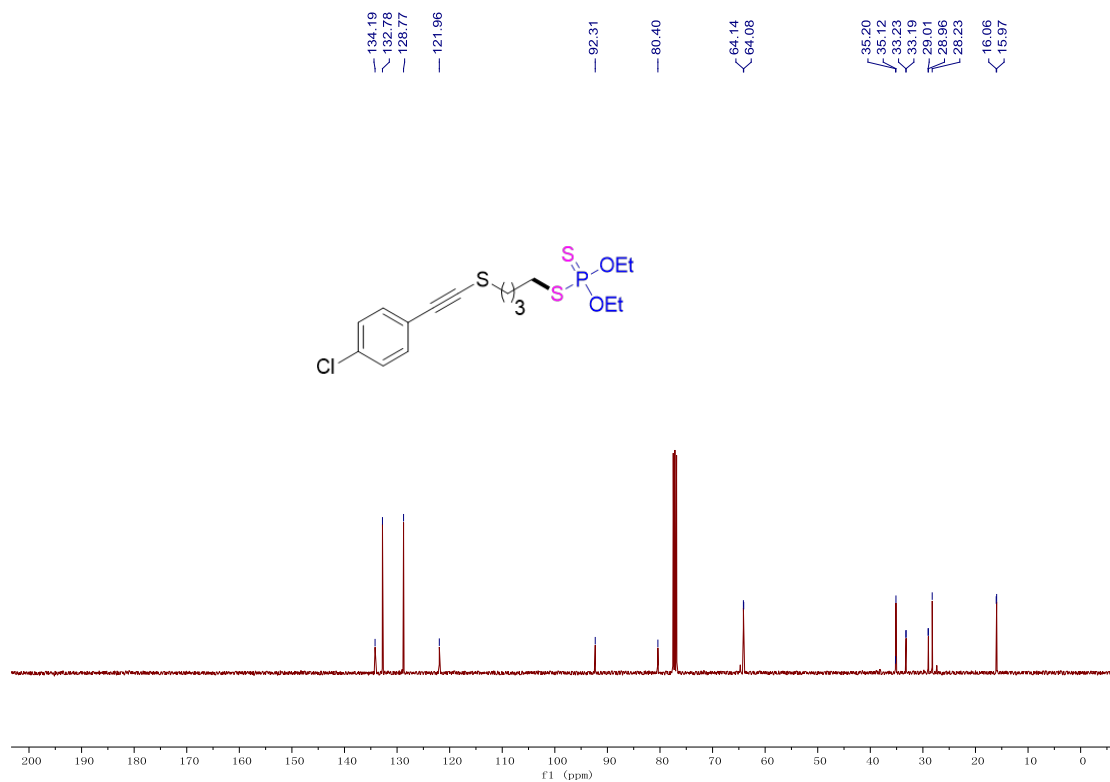

$^{13}\text{C}$  NMR (101 MHz,  $\text{CDCl}_3$ ) spectra of **9r**

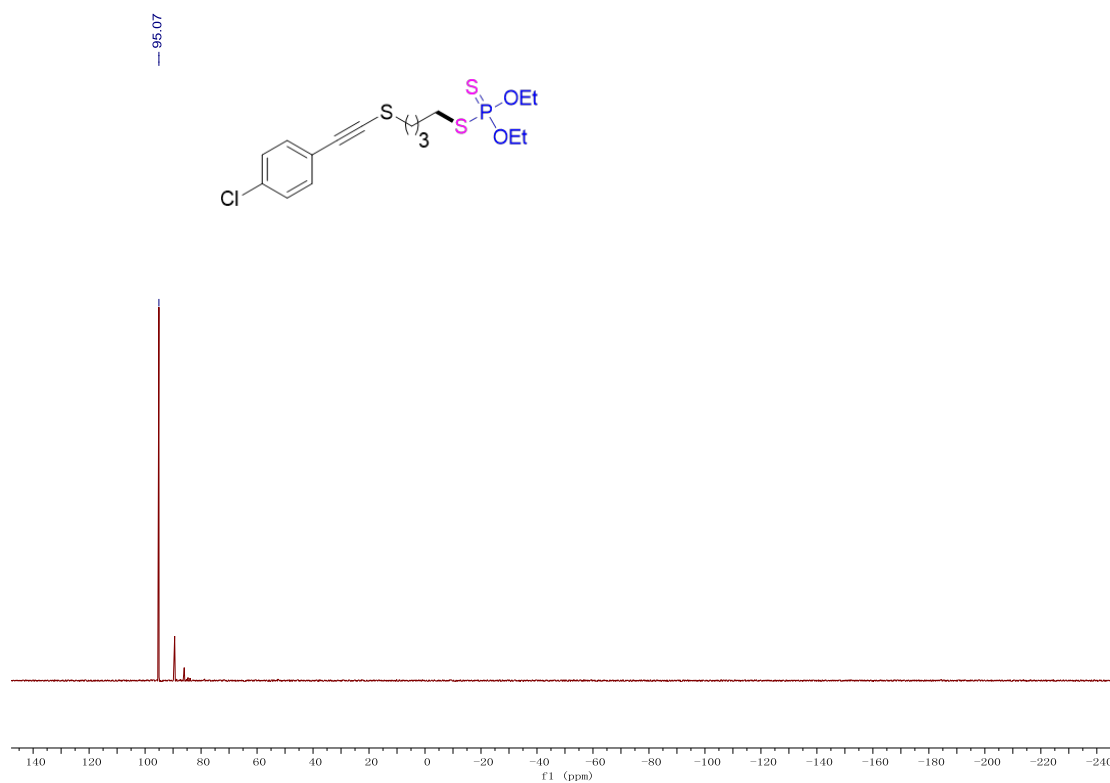

$^{31}\text{P}$  NMR (162 MHz,  $\text{CDCl}_3$ ) spectra of **9r**

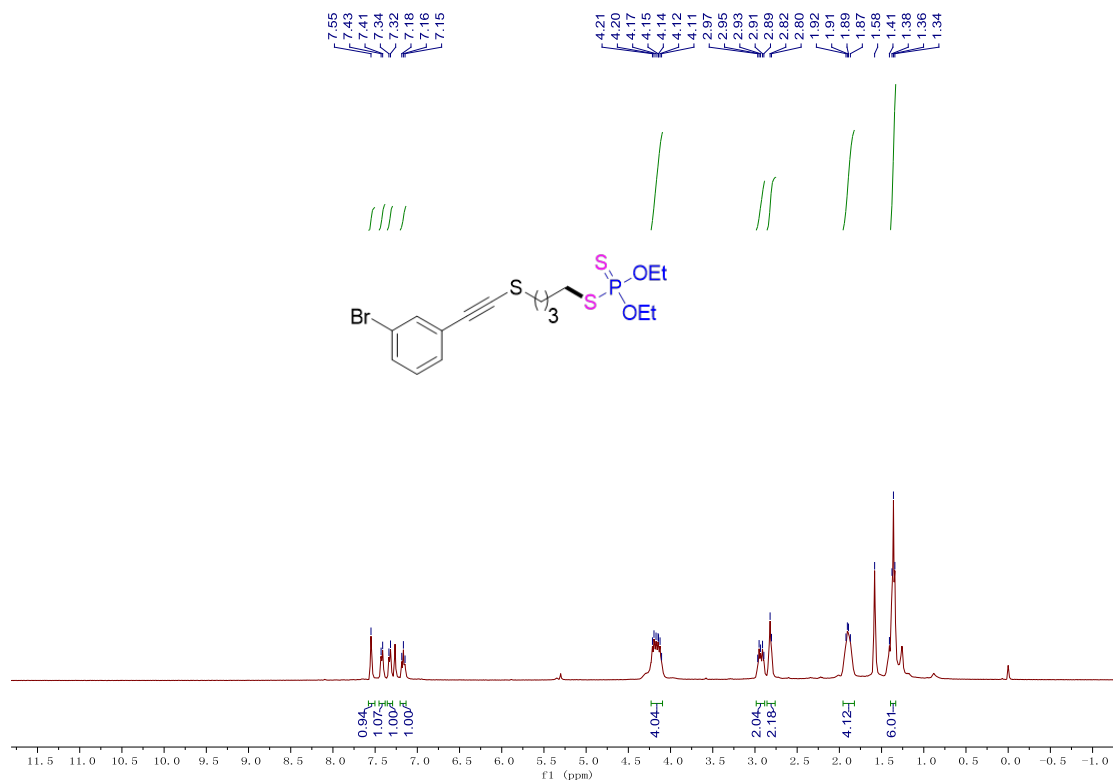

<sup>1</sup>H NMR (400 MHz, CDCl<sub>3</sub>) spectra of **9s**

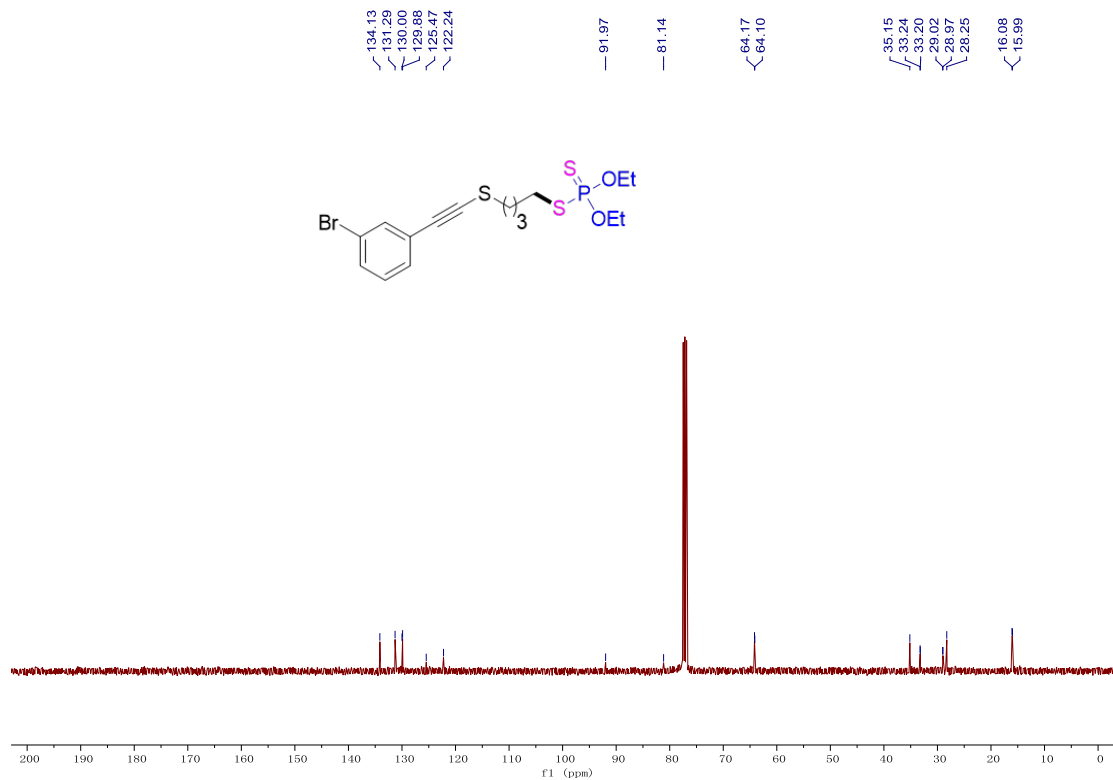

<sup>13</sup>C NMR (101 MHz, CDCl<sub>3</sub>) spectra of **9s**

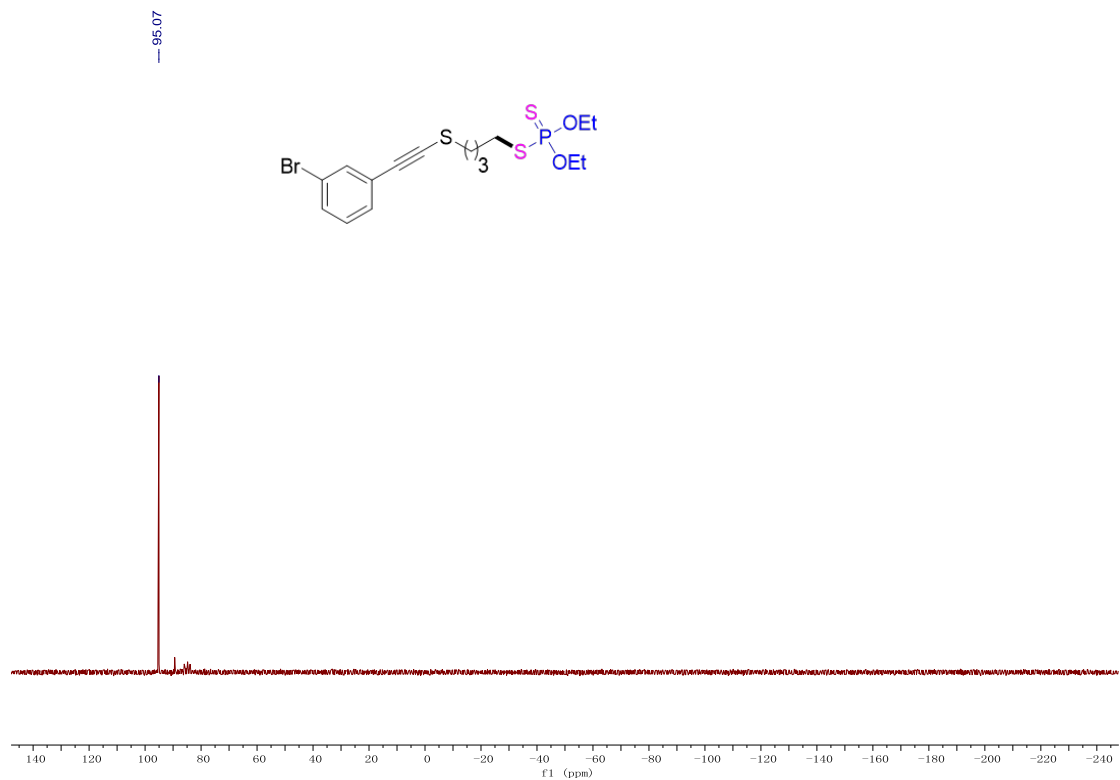

$^{31}\text{P}$  NMR (162 MHz,  $\text{CDCl}_3$ ) spectra of **9s**

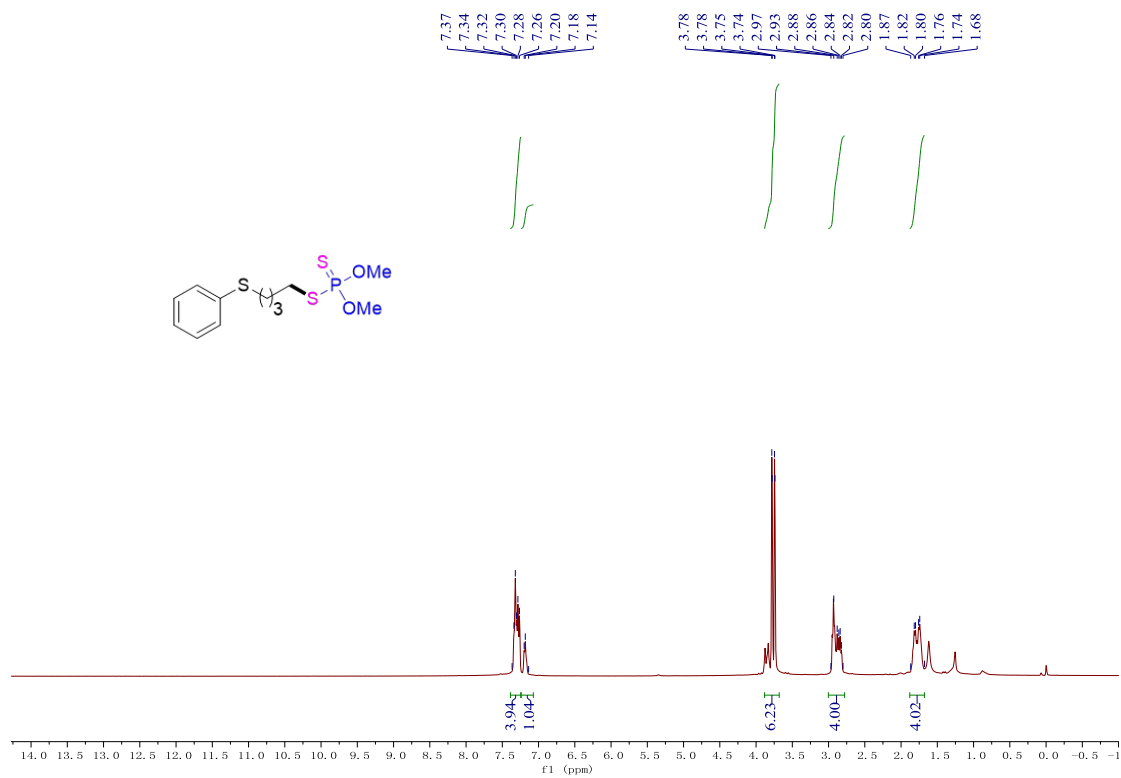

$^1\text{H}$  NMR (400 MHz,  $\text{CDCl}_3$ ) spectra of **9t**

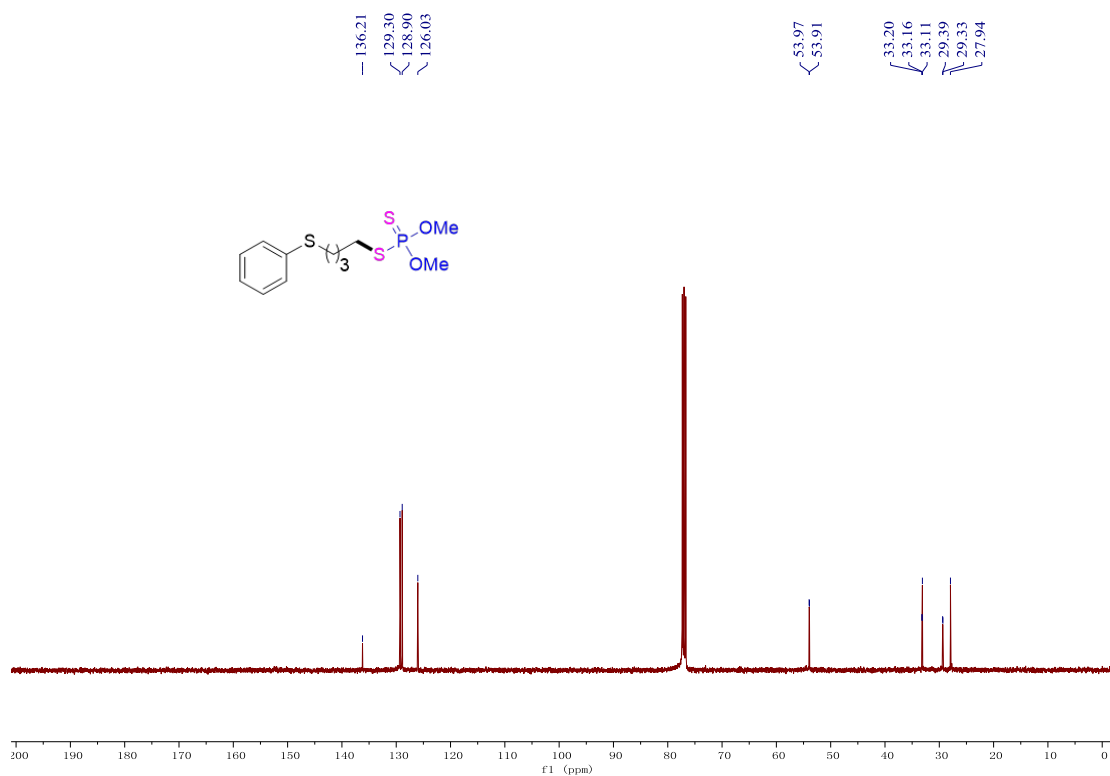

$^{13}\text{C}$  NMR (101 MHz,  $\text{CDCl}_3$ ) spectra of **9t**

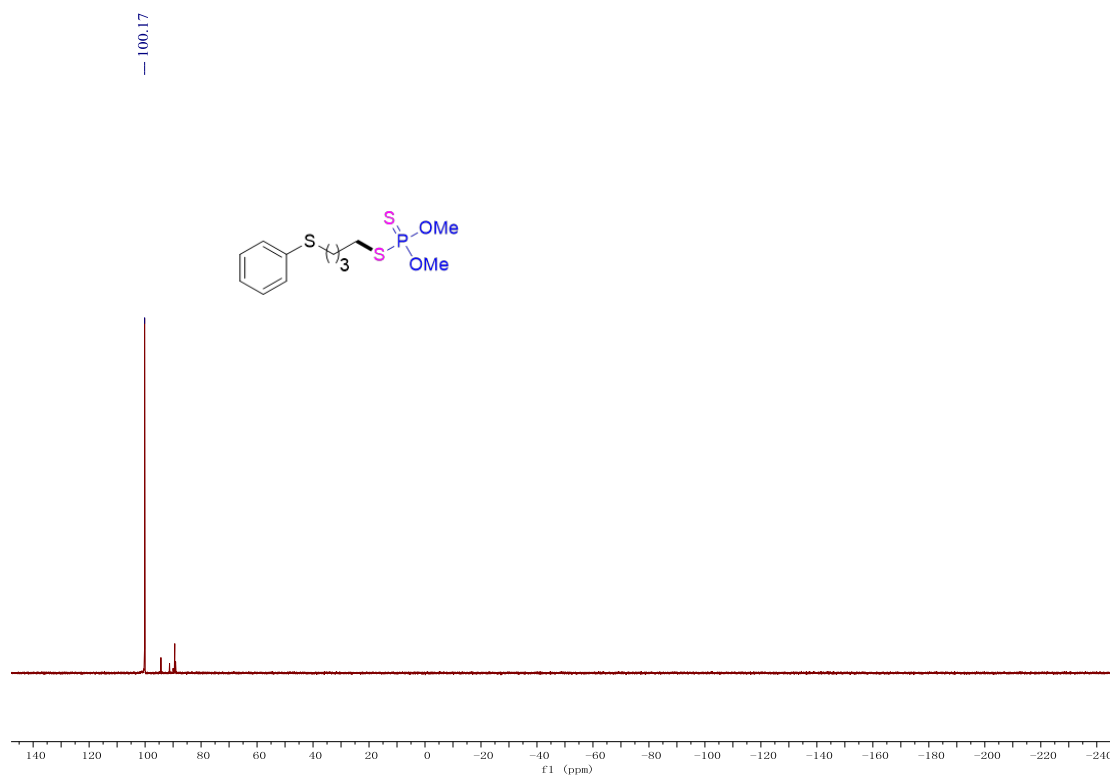

$^{31}\text{P}$  NMR (162 MHz,  $\text{CDCl}_3$ ) spectra of **9t**

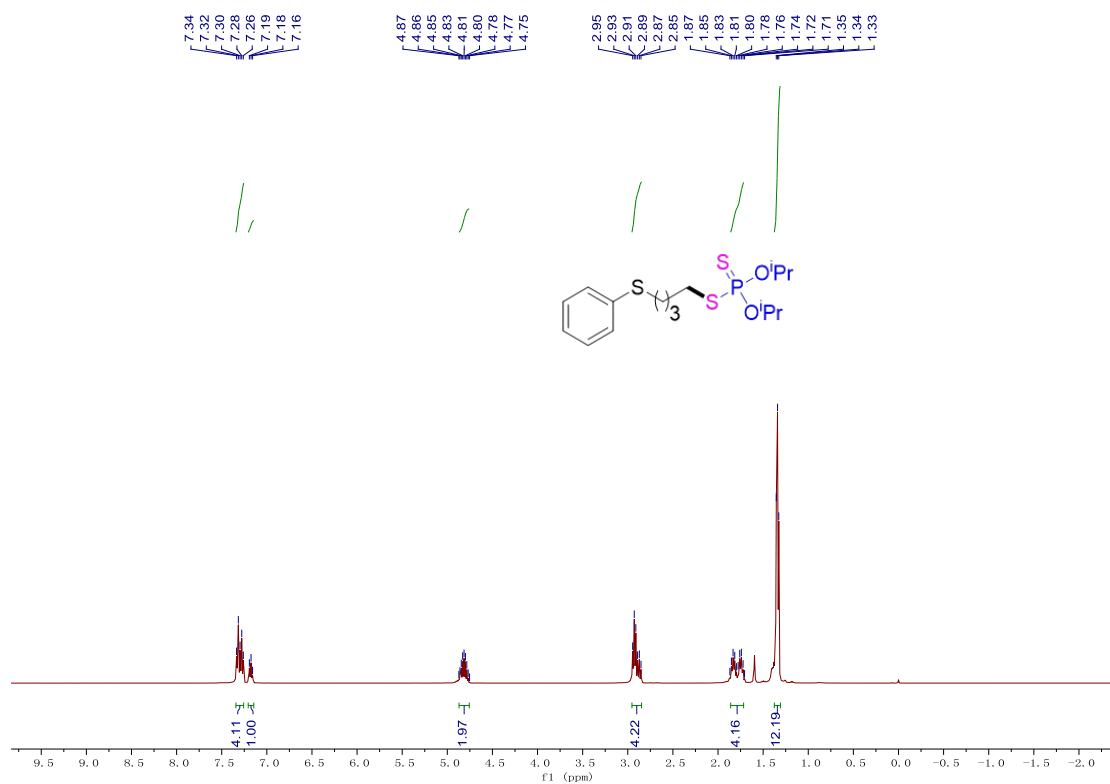

<sup>1</sup>H NMR (400 MHz, CDCl<sub>3</sub>) spectra of **9u**

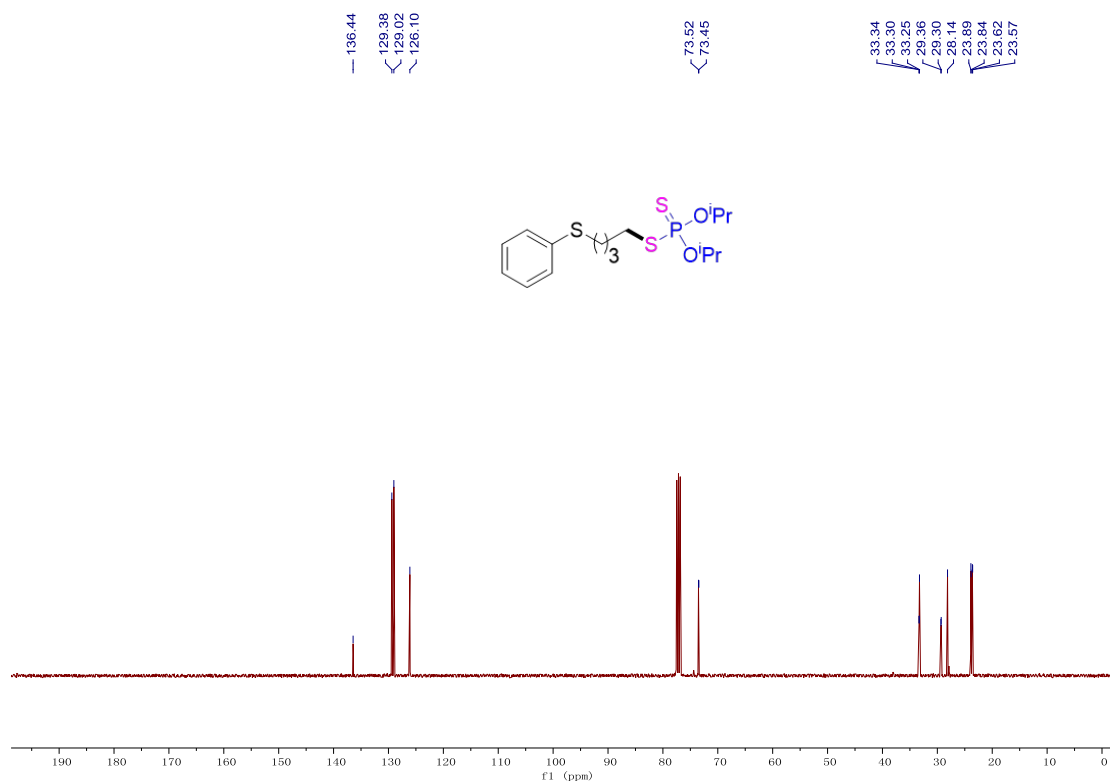

<sup>13</sup>C NMR (101 MHz, CDCl<sub>3</sub>) spectra of **9u**

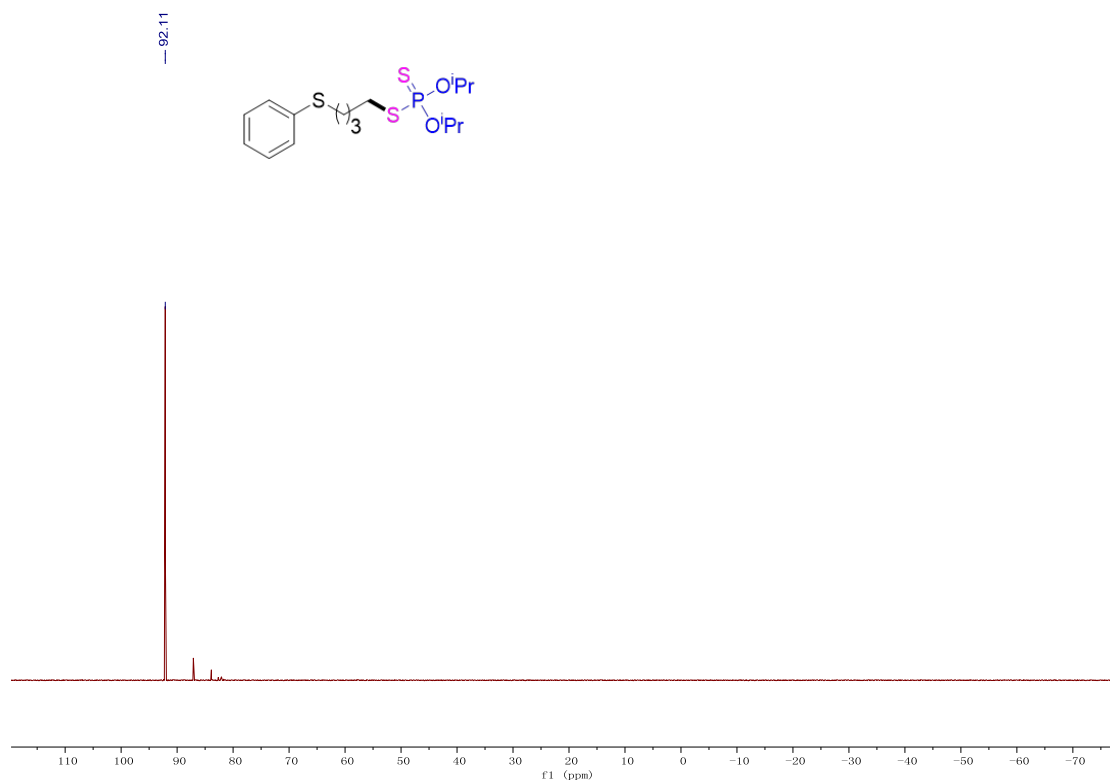

<sup>31</sup>P NMR (162 MHz, CDCl<sub>3</sub>) spectra of **9u**

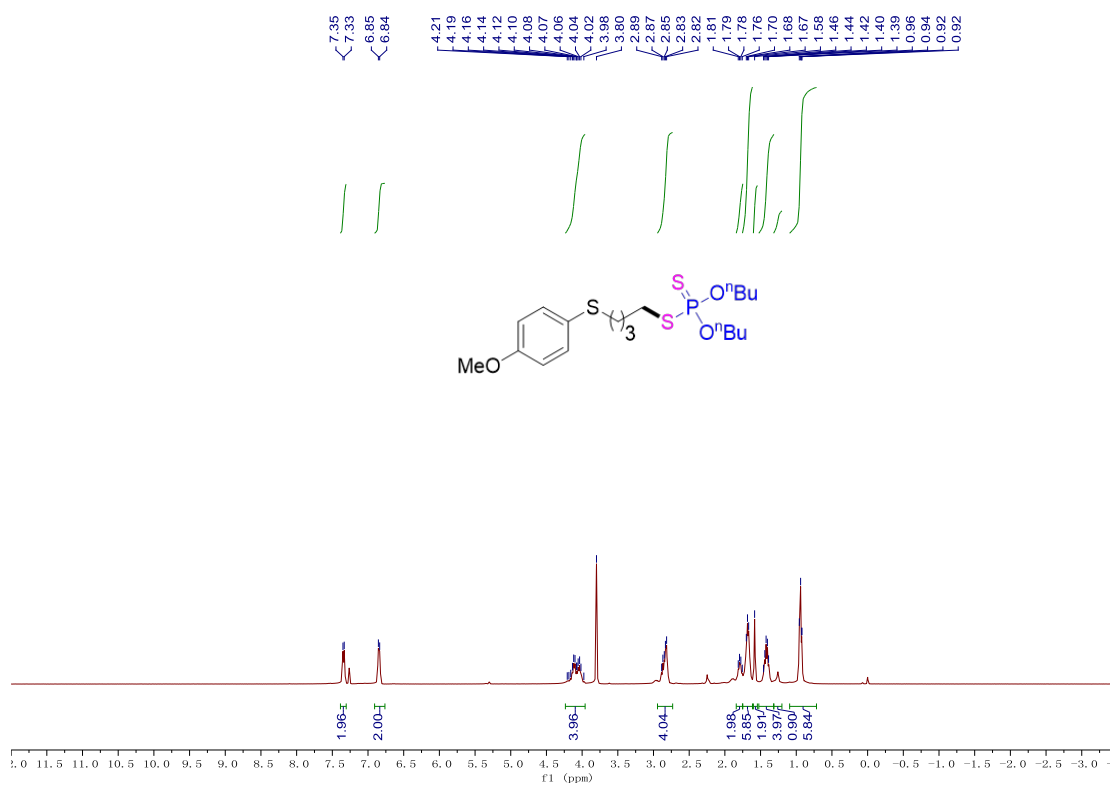

<sup>1</sup>H NMR (400 MHz, CDCl<sub>3</sub>) spectra of **9v**

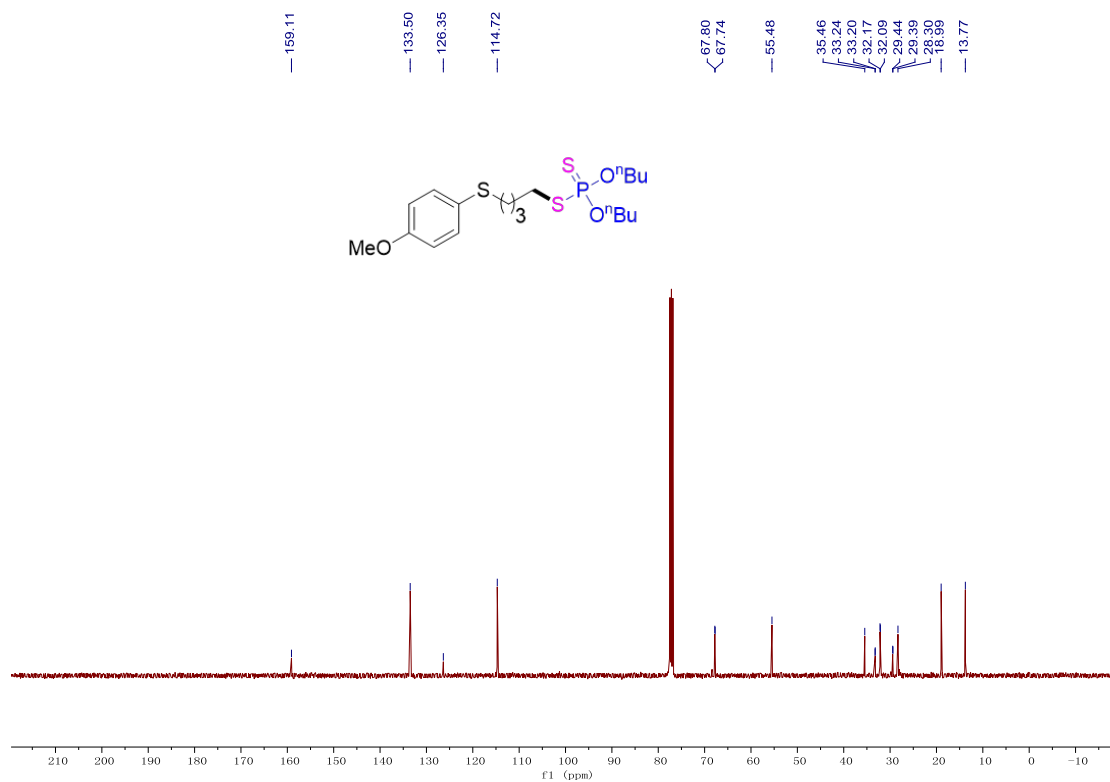

$^{13}\text{C}$  NMR (101 MHz,  $\text{CDCl}_3$ ) spectra of **9v**

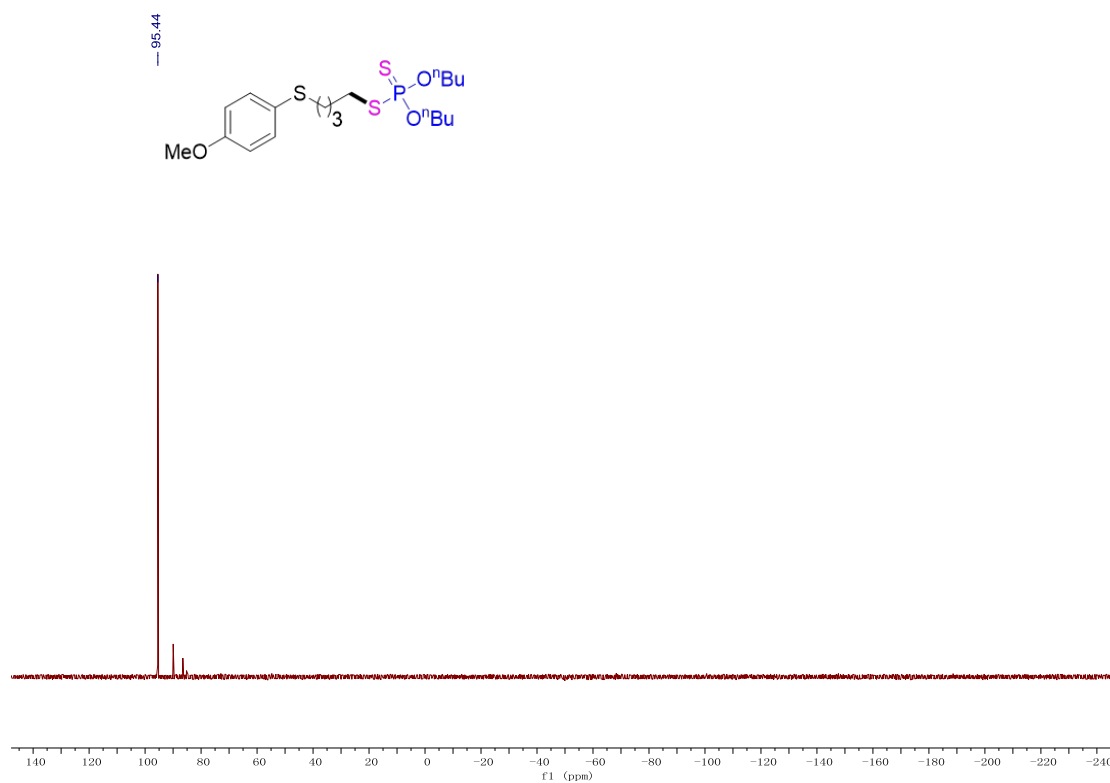

$^{31}\text{P}$  NMR (162 MHz,  $\text{CDCl}_3$ ) spectra of **9v**



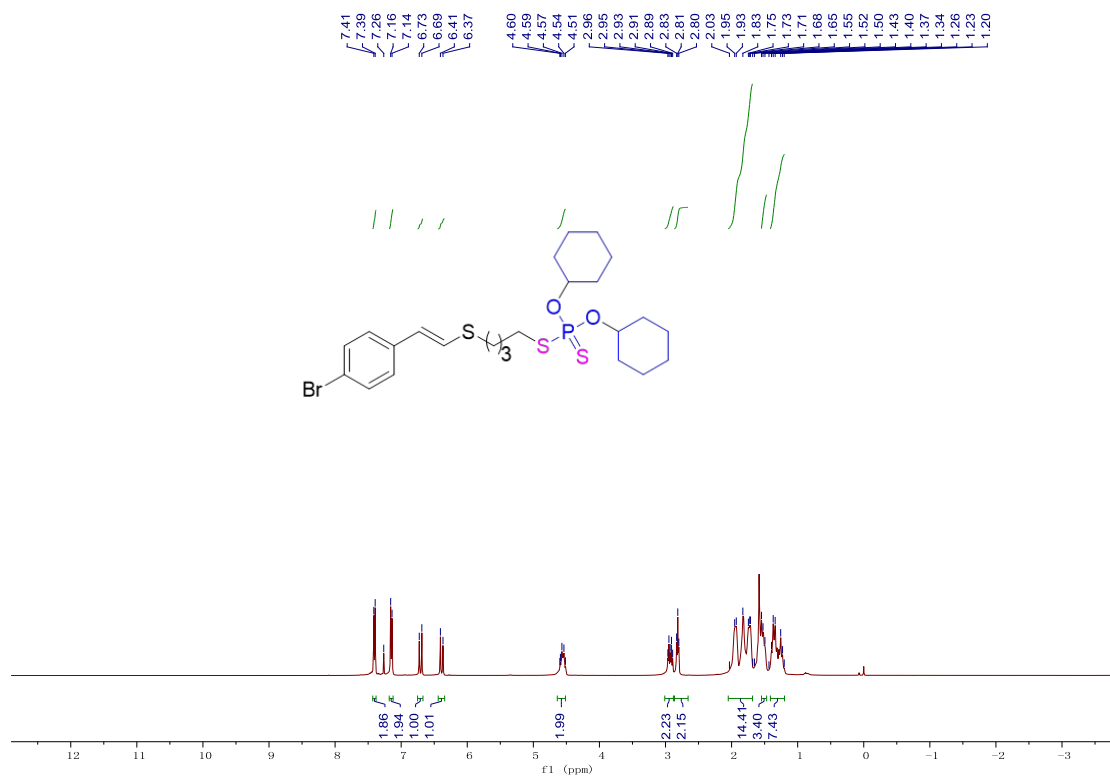

<sup>1</sup>H NMR (400 MHz, CDCl<sub>3</sub>) spectra of **9w**

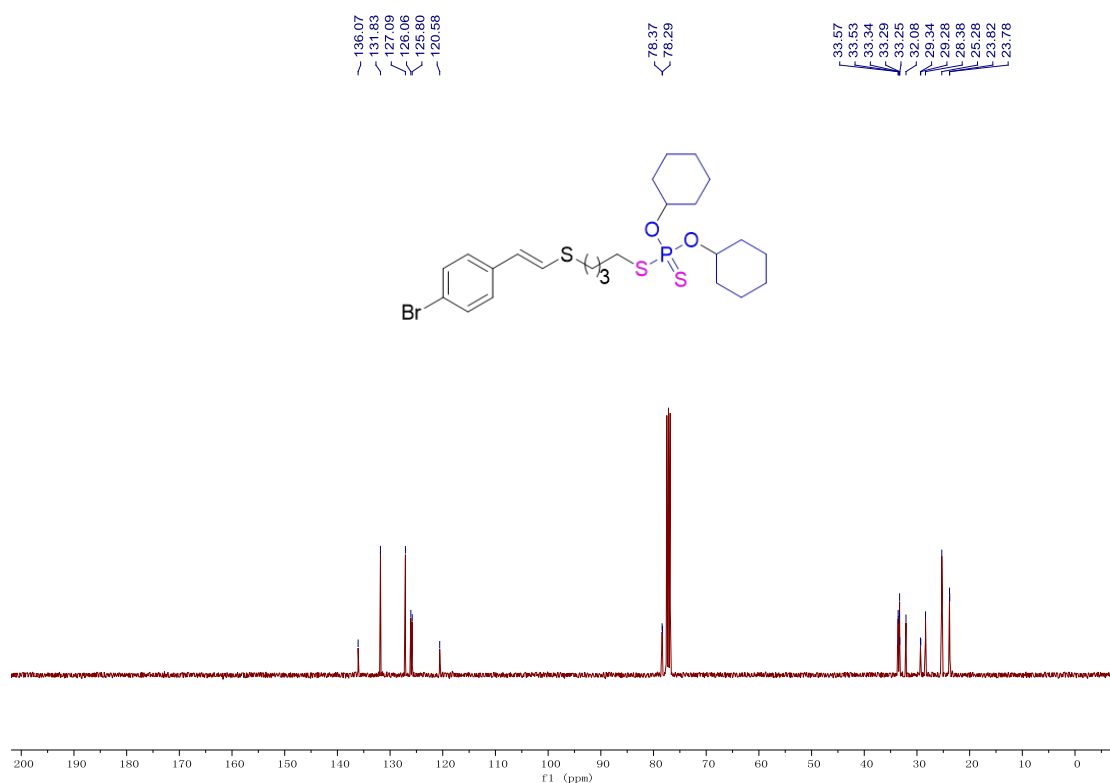

<sup>13</sup>C NMR (101 MHz, CDCl<sub>3</sub>) spectra of **9w**

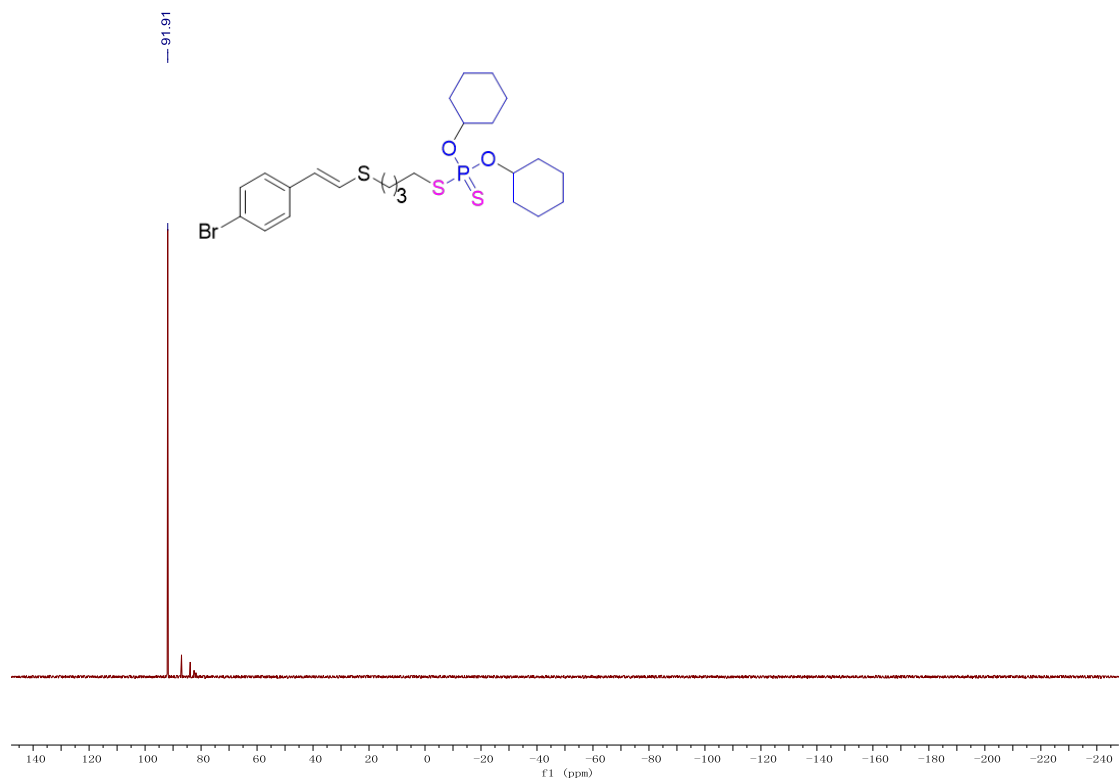

$^{31}\text{P}$  NMR (162 MHz,  $\text{CDCl}_3$ ) spectra of **9w**

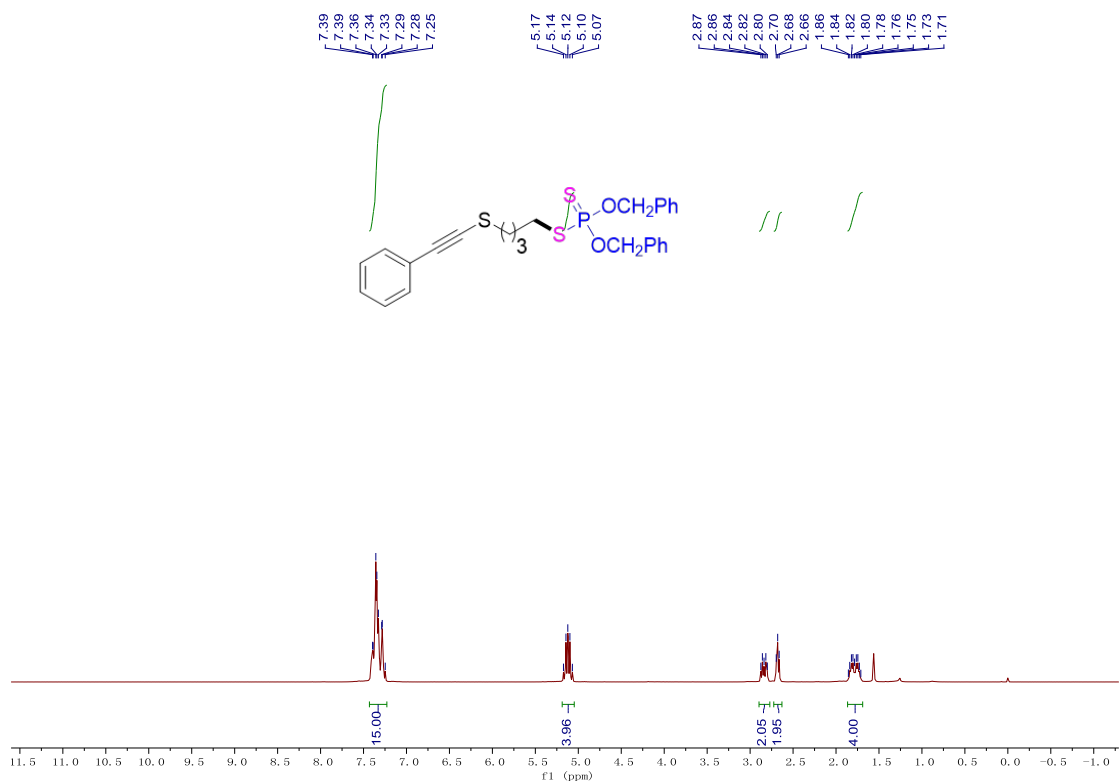

$^1\text{H}$  NMR (400 MHz,  $\text{CDCl}_3$ ) spectra of **9x**

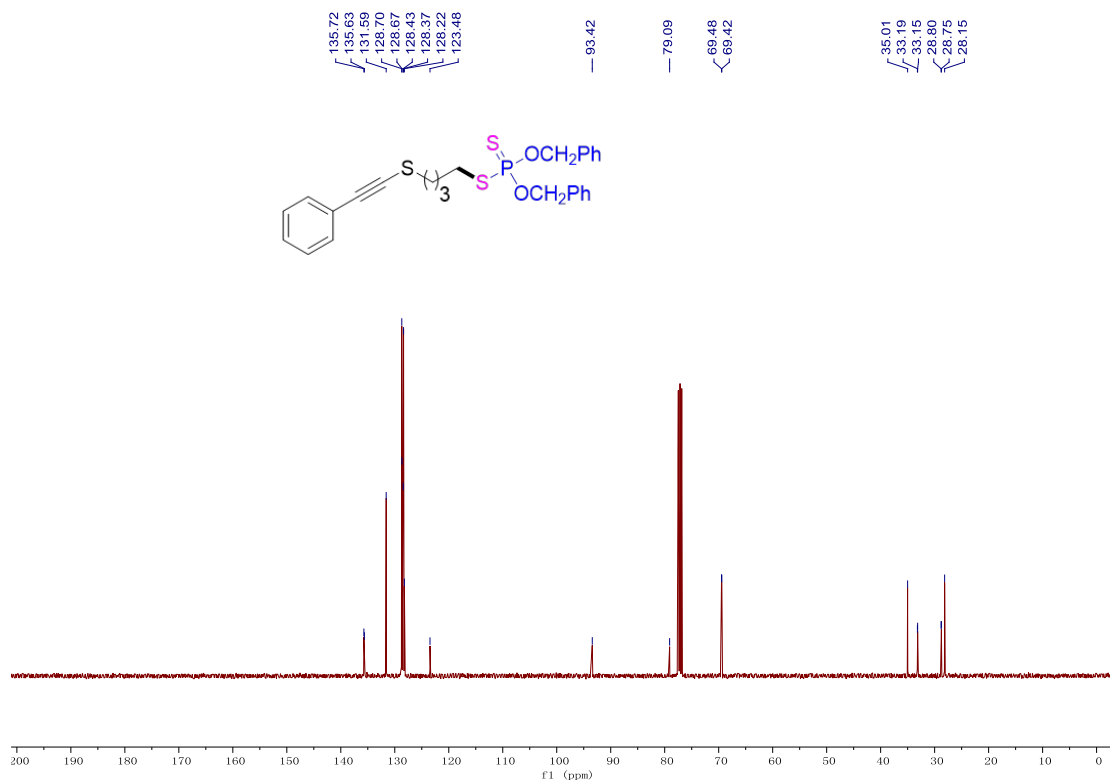

$^{13}\text{C}$  NMR (101 MHz,  $\text{CDCl}_3$ ) spectra of **9x**

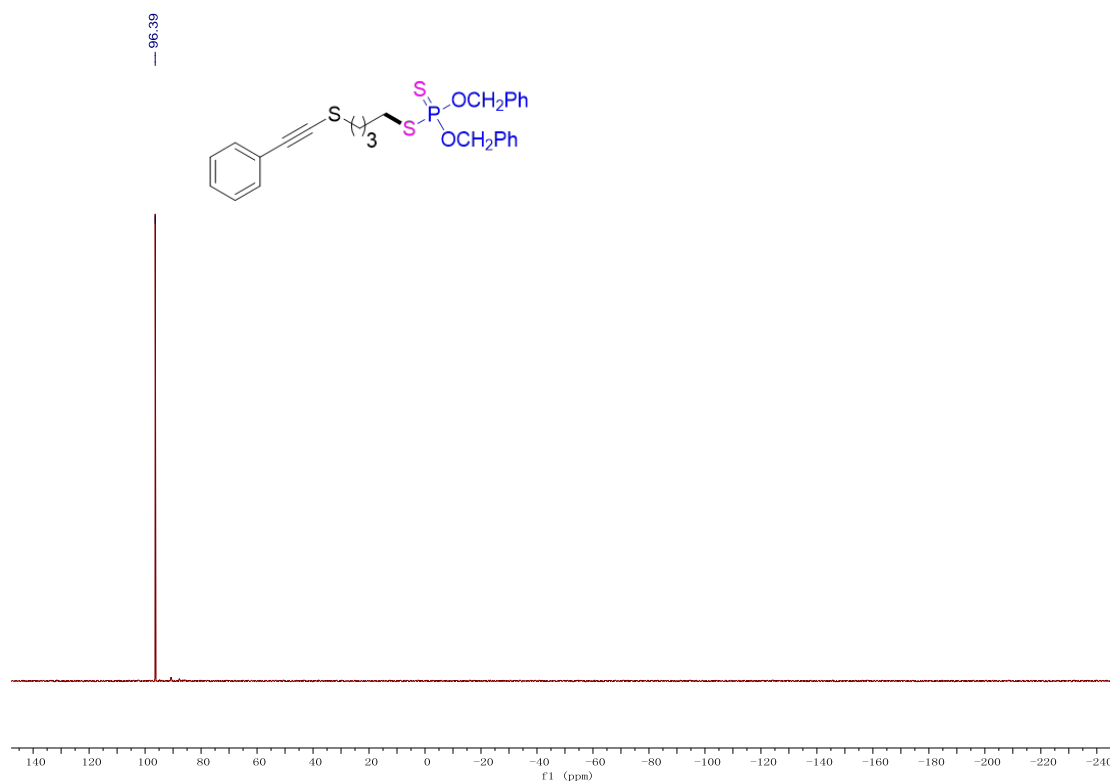

$^{31}\text{P}$  NMR (162 MHz,  $\text{CDCl}_3$ ) spectra of **9x**

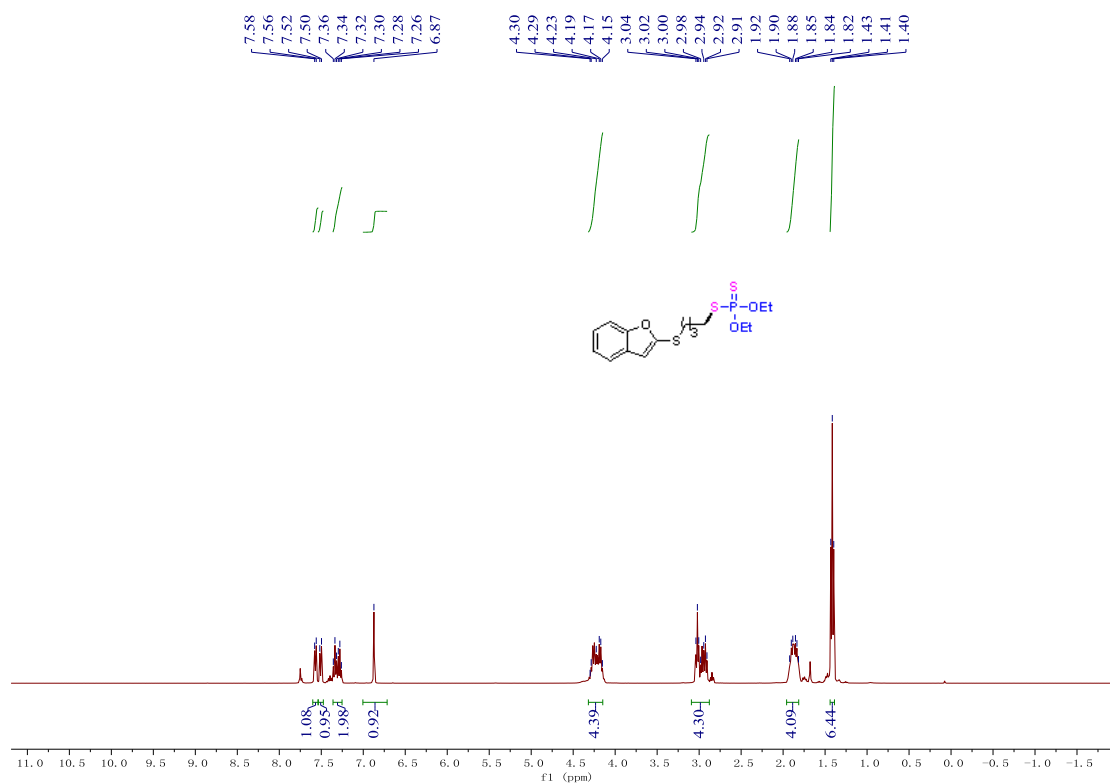

<sup>1</sup>H NMR (400 MHz, CDCl<sub>3</sub>) spectra of **9y**

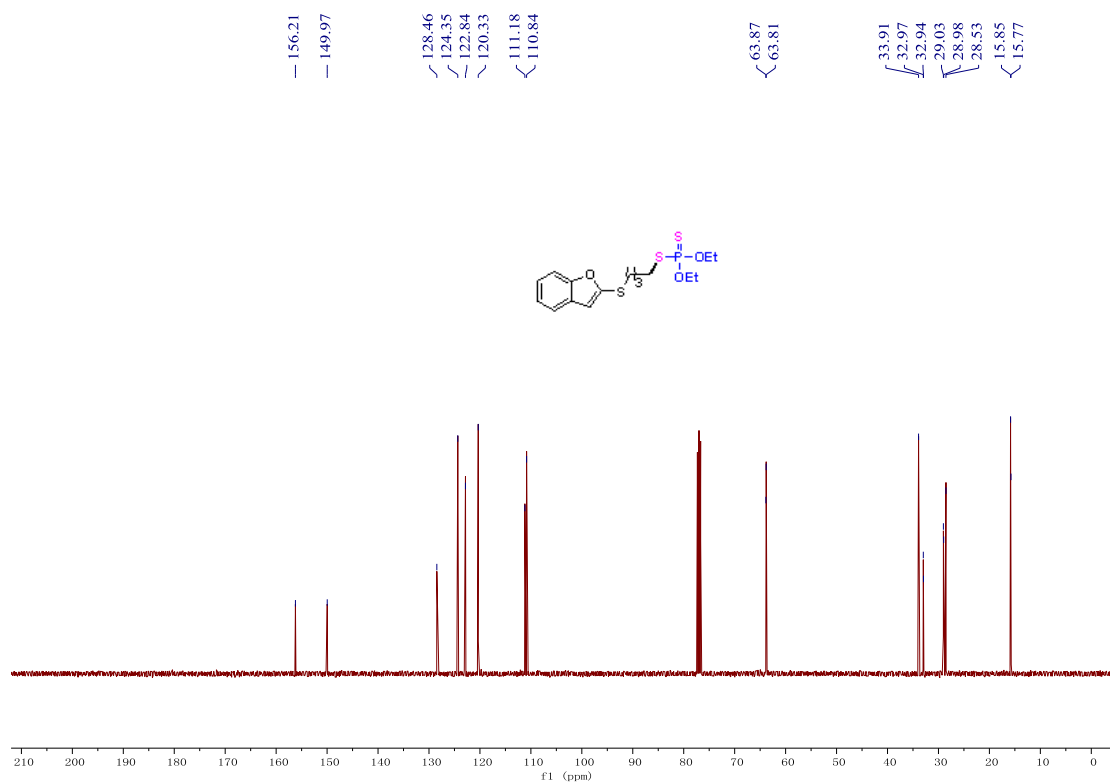

<sup>13</sup>C NMR (101 MHz, CDCl<sub>3</sub>) spectra of **9y**

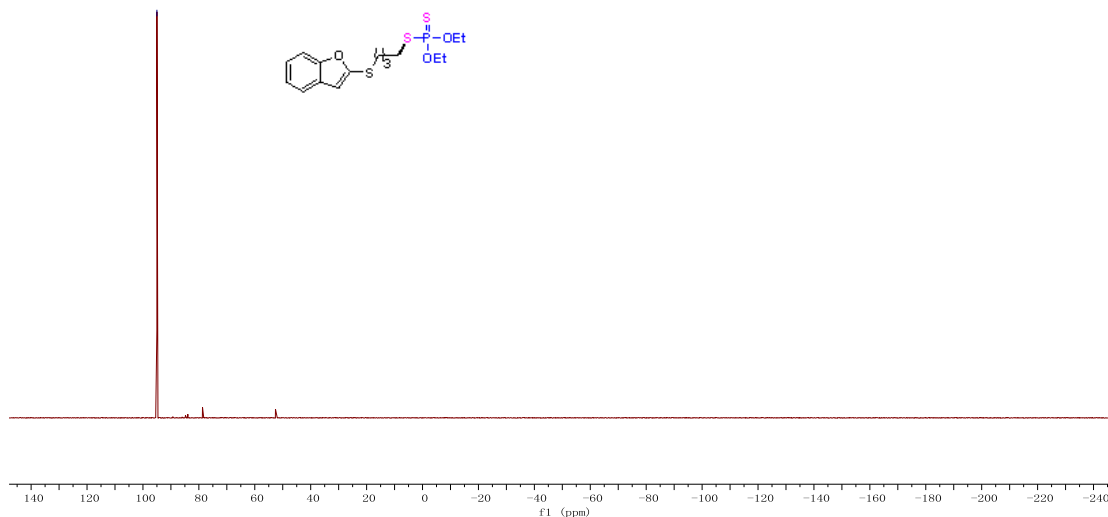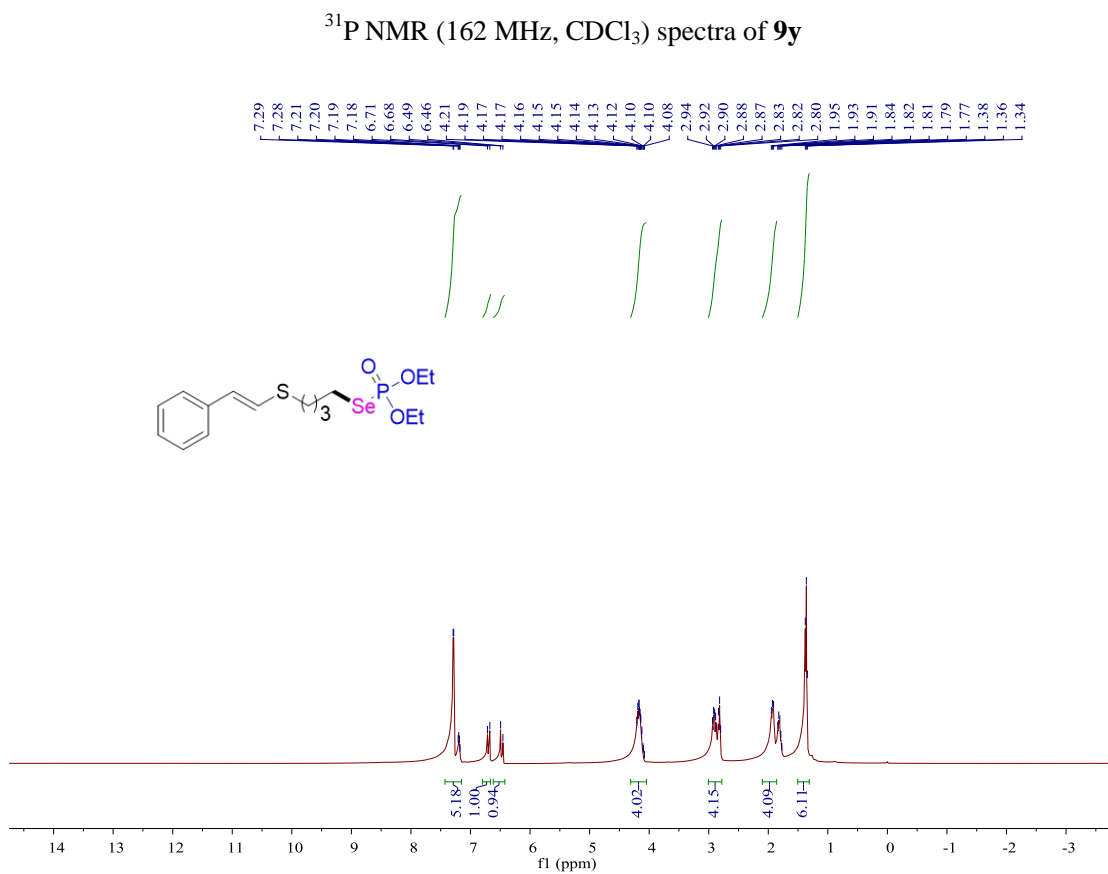

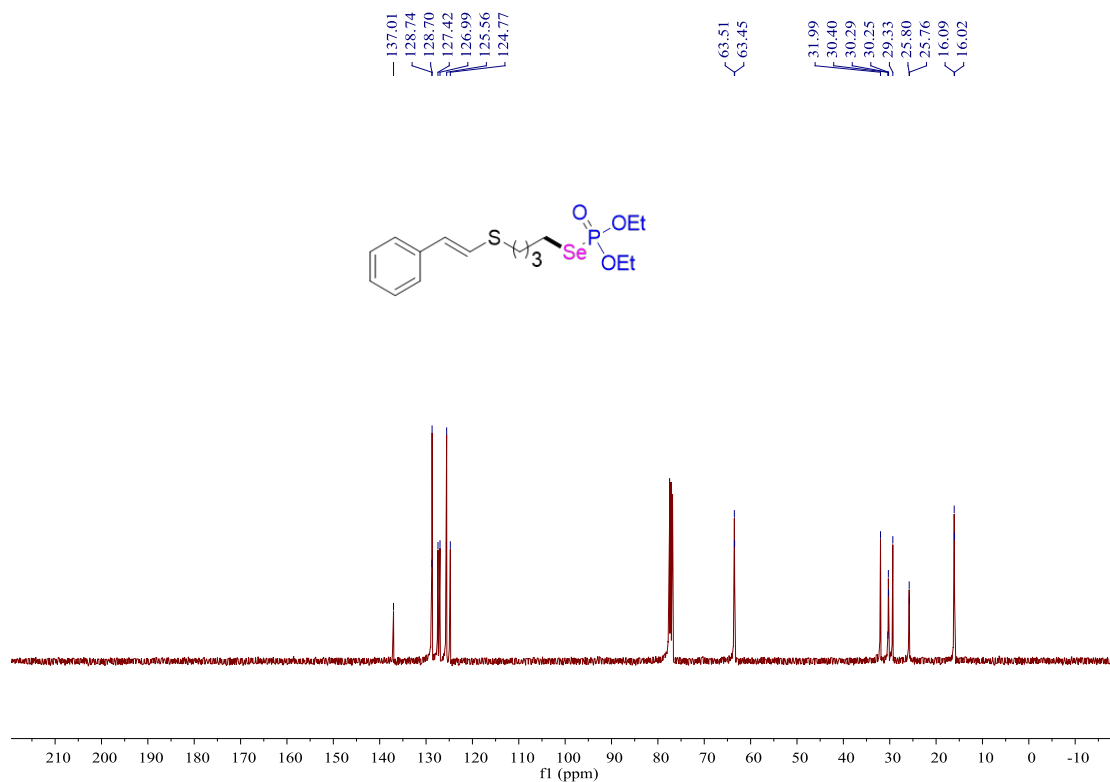

<sup>13</sup>C NMR (101 MHz, CDCl<sub>3</sub>) spectra of **10a**

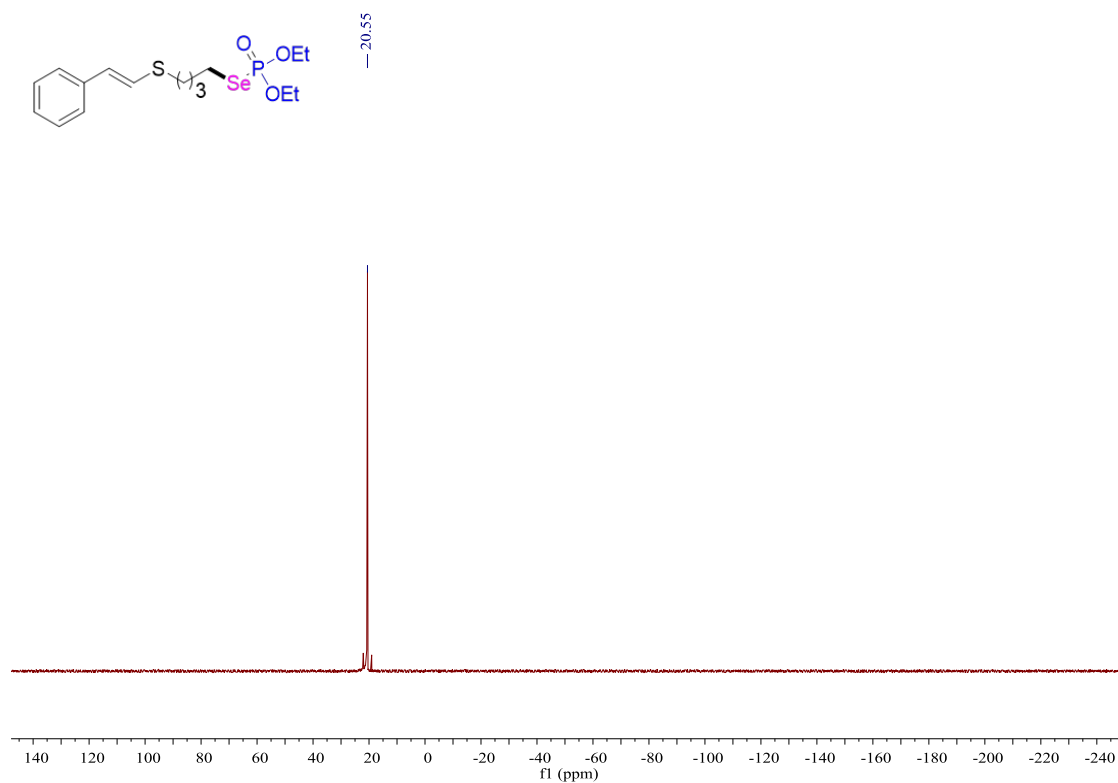

<sup>31</sup>P NMR (162 MHz, CDCl<sub>3</sub>) spectra of **10a**

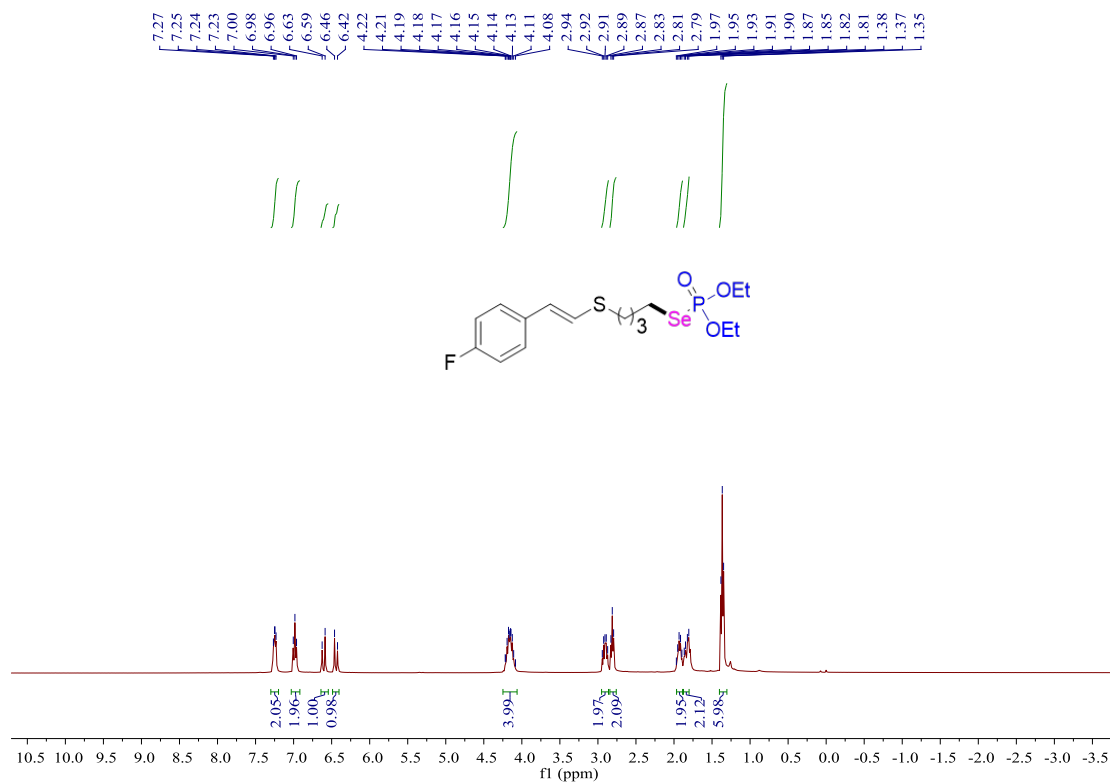

<sup>1</sup>H NMR (400 MHz, CDCl<sub>3</sub>) spectra of **10b**

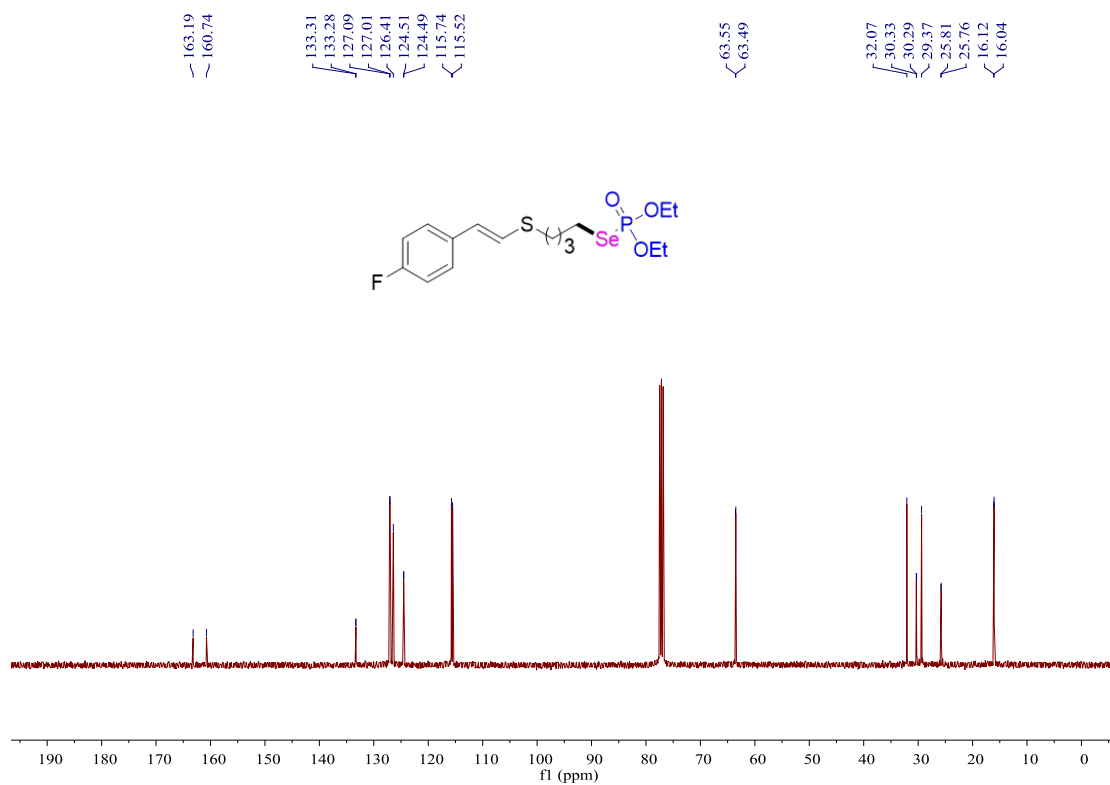

<sup>13</sup>C NMR (101 MHz, CDCl<sub>3</sub>) spectra of **10b**

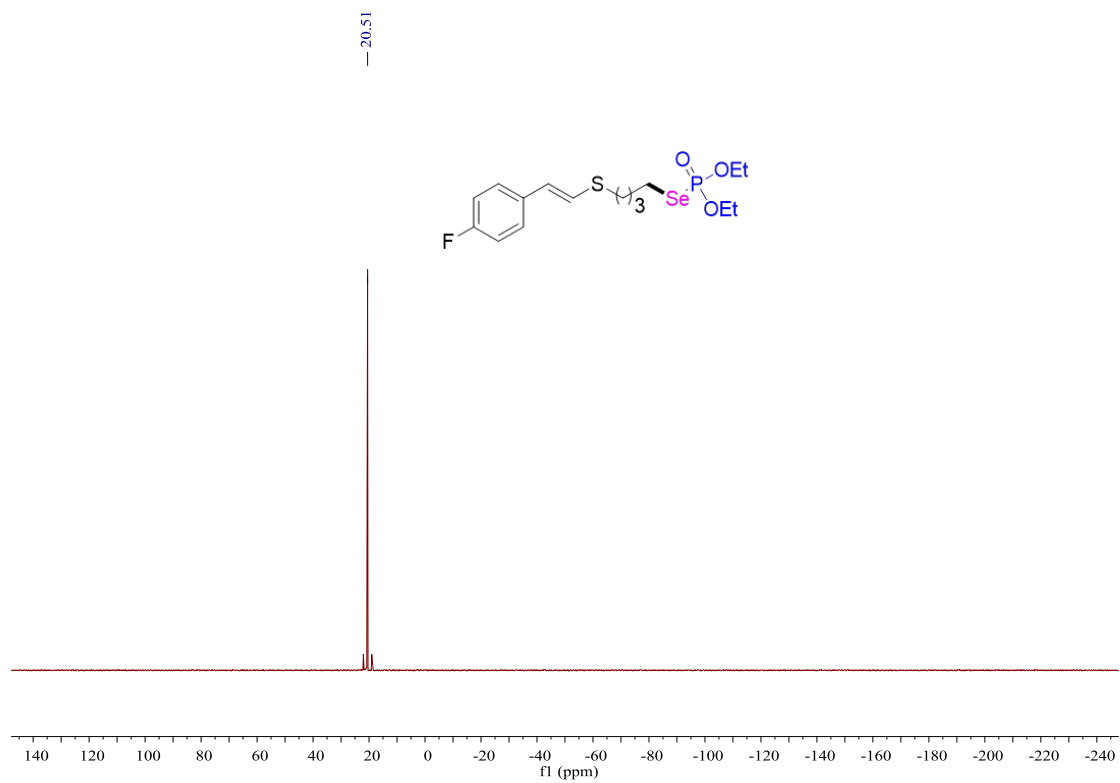

$^{31}\text{P}$  NMR (162 MHz,  $\text{CDCl}_3$ ) spectra of **10b**

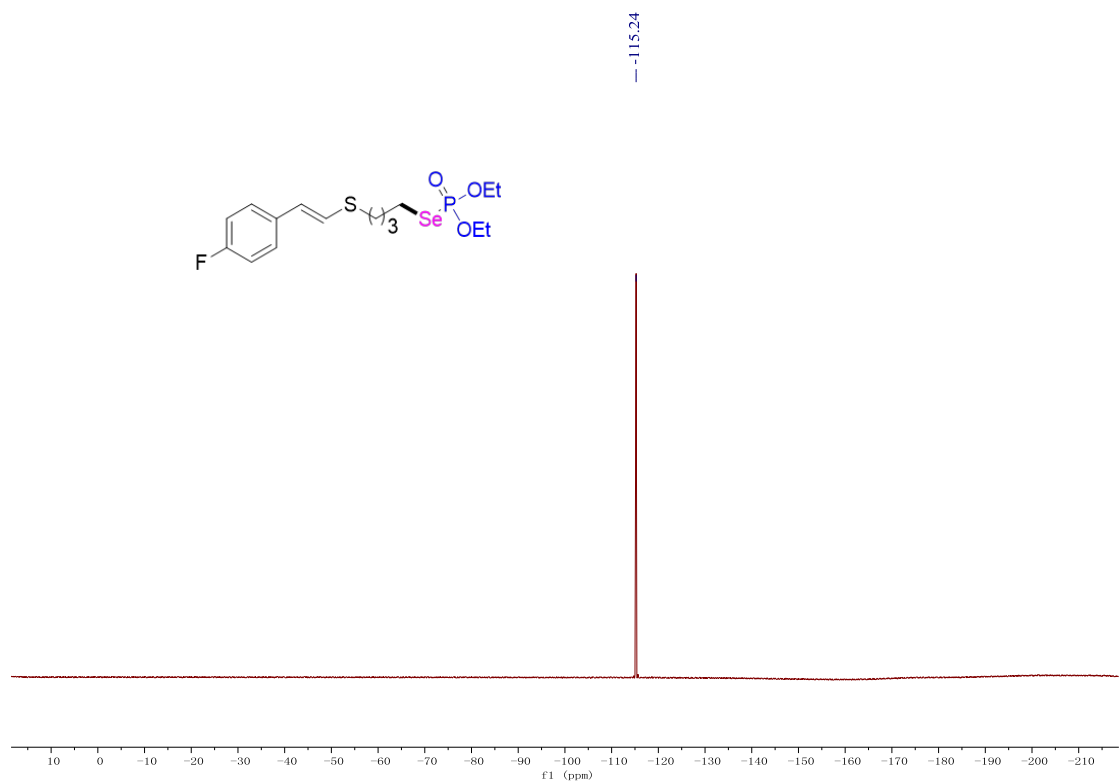

$^{19}\text{F}$  NMR (376 MHz,  $\text{CDCl}_3$ ) spectra of **10b**



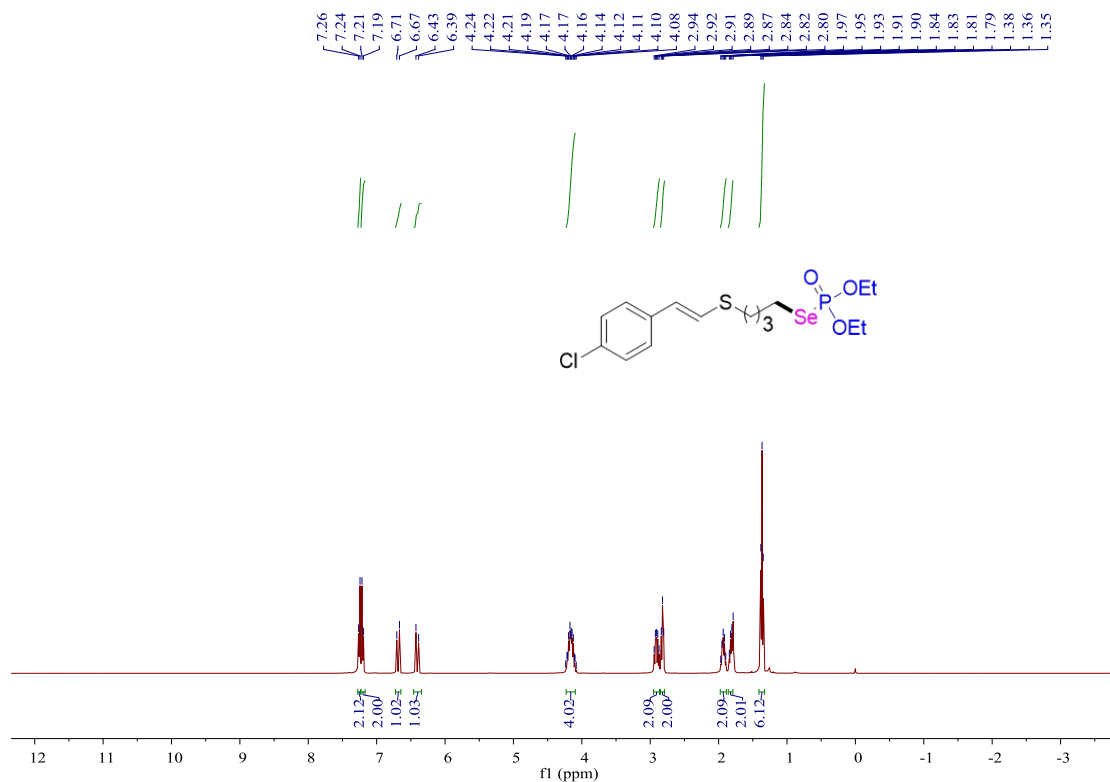

<sup>1</sup>H NMR (400 MHz, CDCl<sub>3</sub>) spectra of **10c**

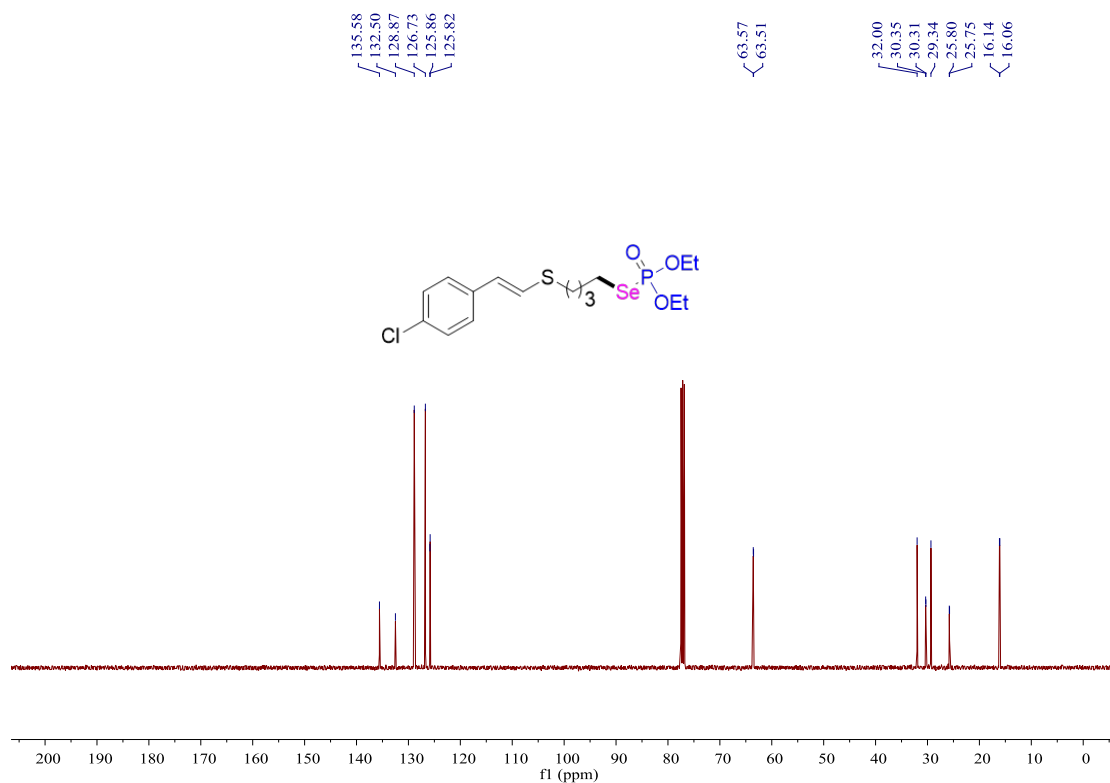

<sup>13</sup>C NMR (101 MHz, CDCl<sub>3</sub>) spectra of **10c**

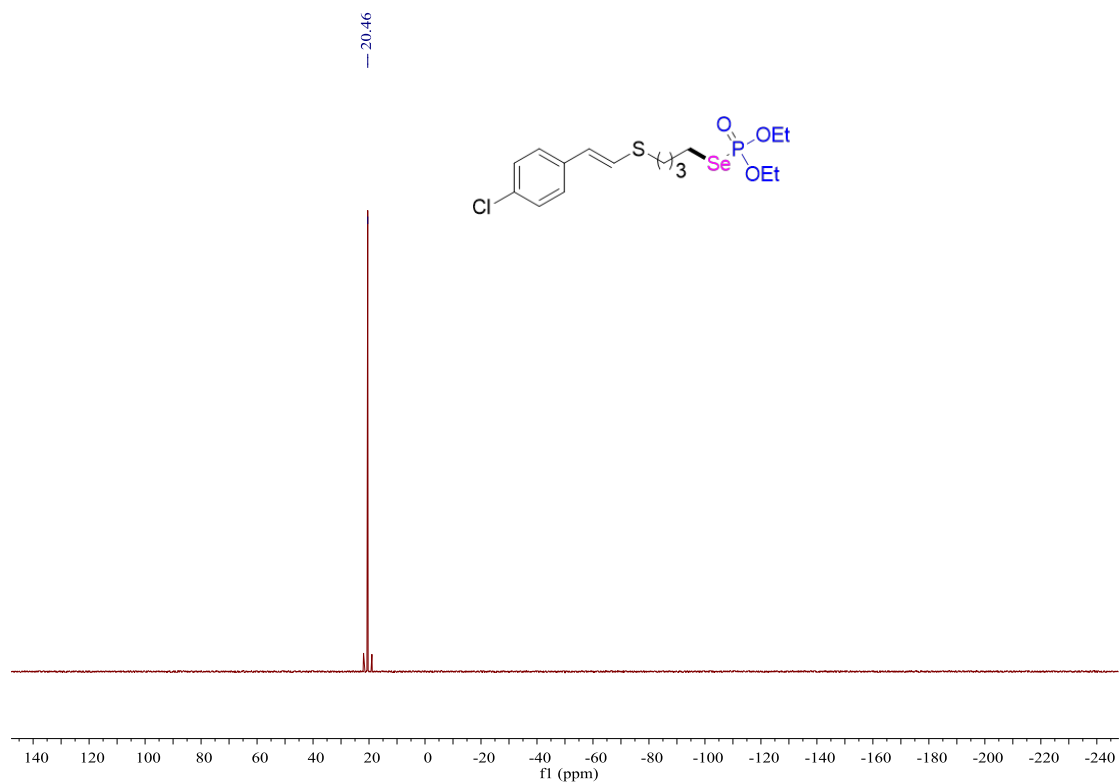

$^{31}\text{P}$  NMR (162 MHz,  $\text{CDCl}_3$ ) spectra of **10c**

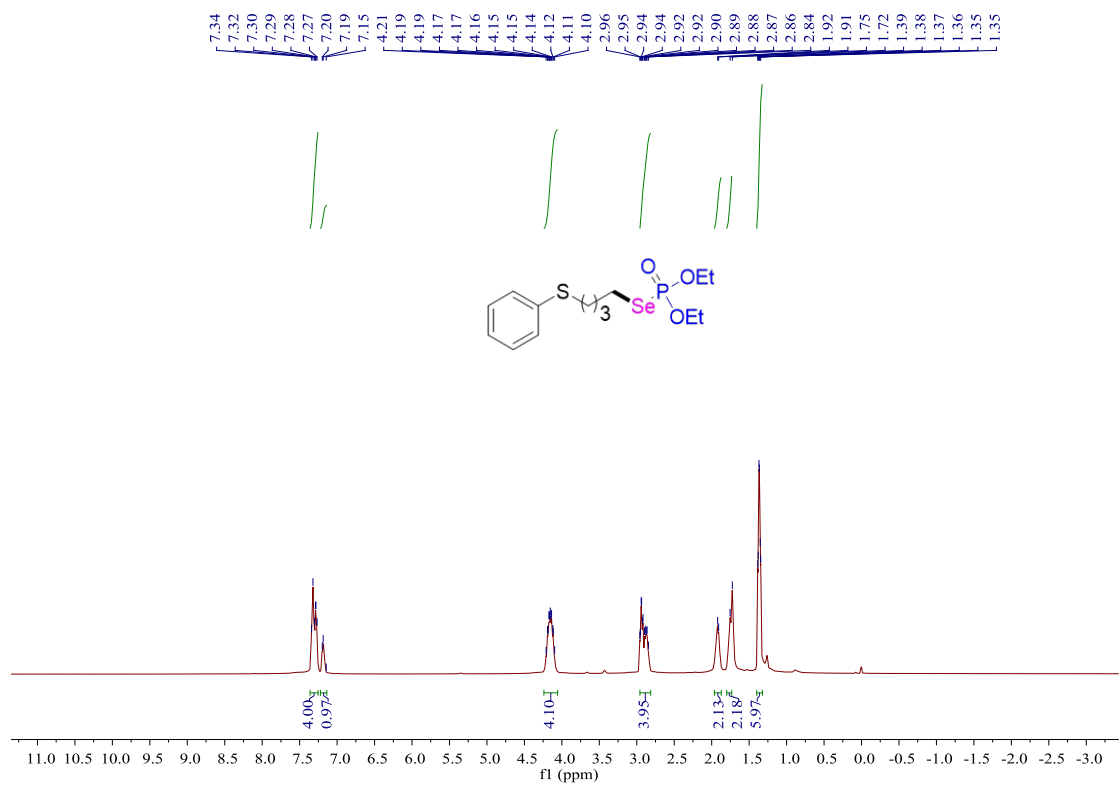

$^1\text{H}$  NMR (400 MHz,  $\text{CDCl}_3$ ) spectra of **10d**

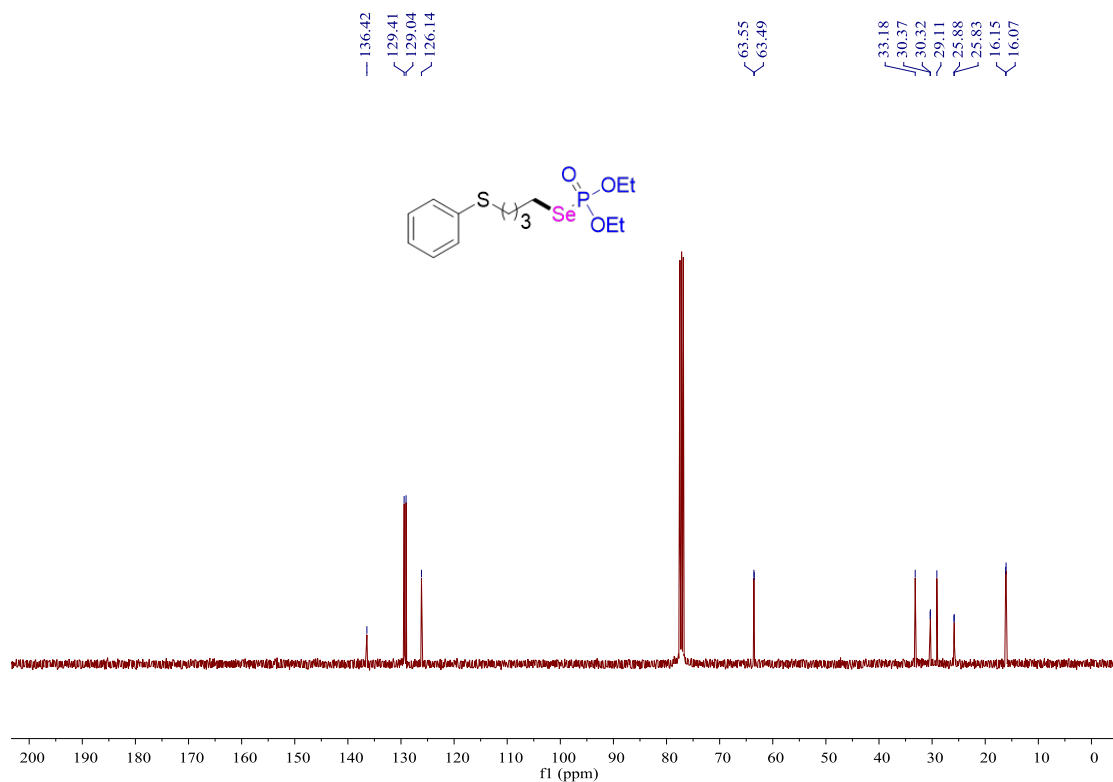

<sup>13</sup>C NMR (101 MHz, CDCl<sub>3</sub>) spectra of **10d**

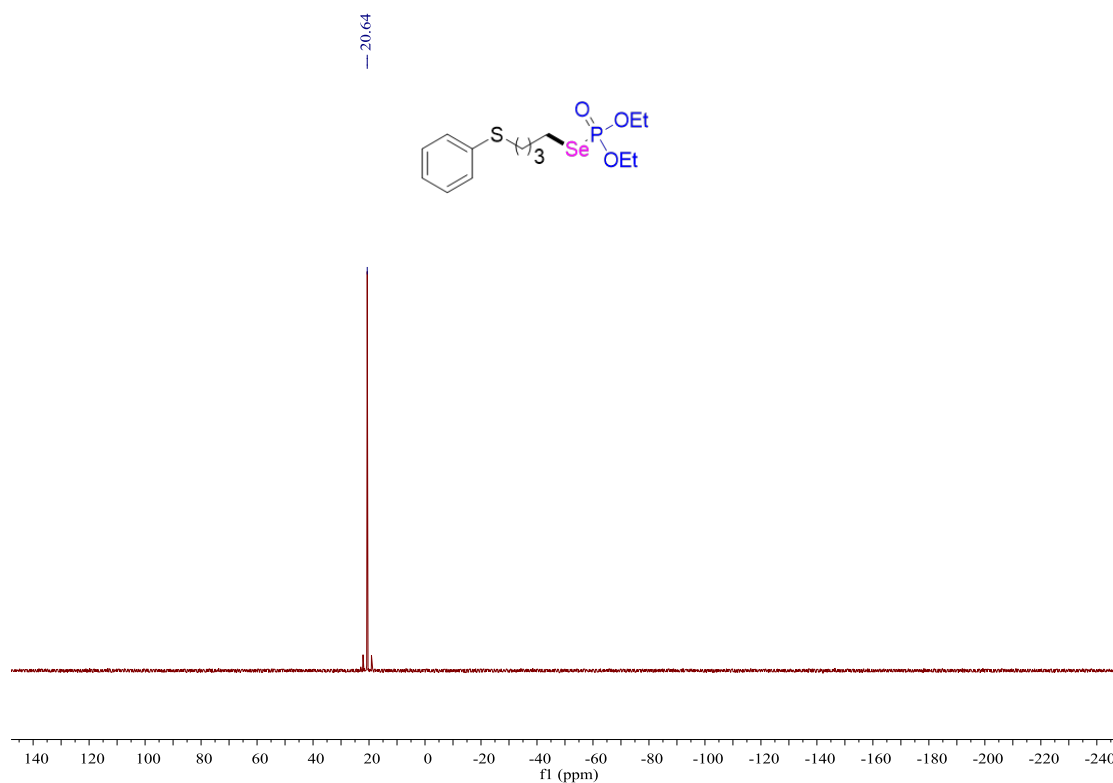

<sup>31</sup>P NMR (162 MHz, CDCl<sub>3</sub>) spectra of **10d**

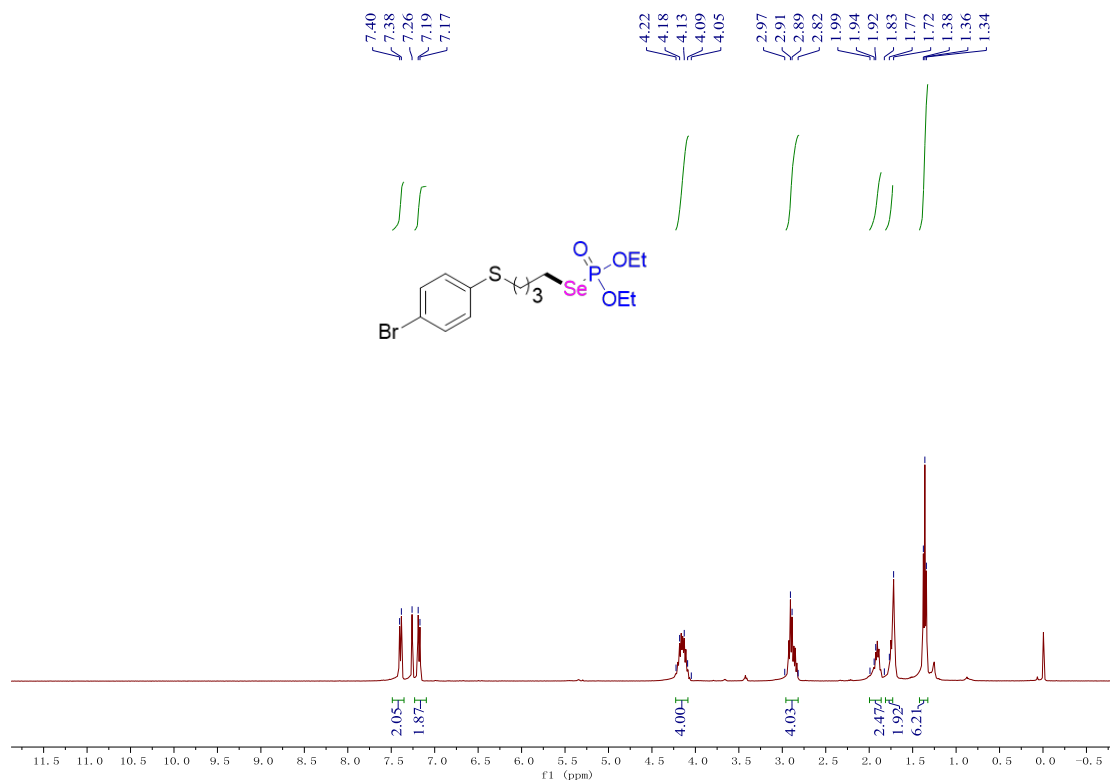

<sup>1</sup>H NMR (400 MHz, CDCl<sub>3</sub>) spectra of **10e**

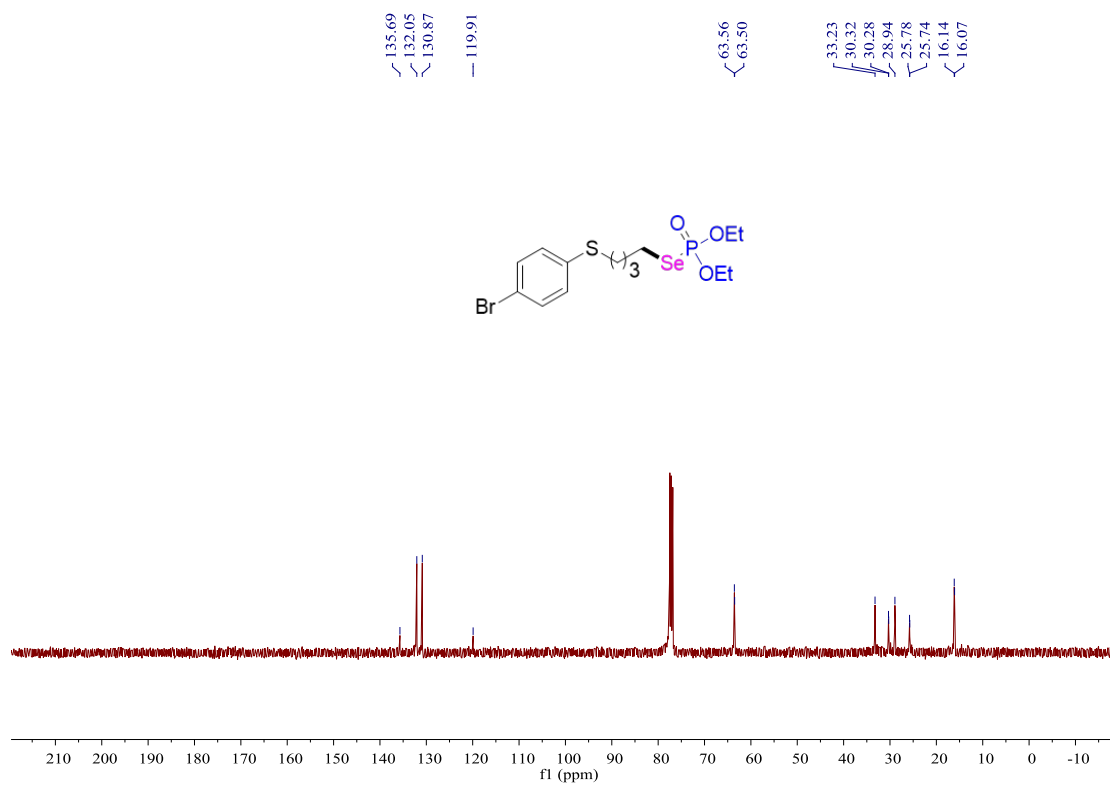

<sup>13</sup>C NMR (101 MHz, CDCl<sub>3</sub>) spectra of **10e**

— 20.47

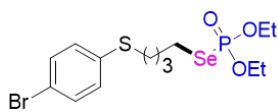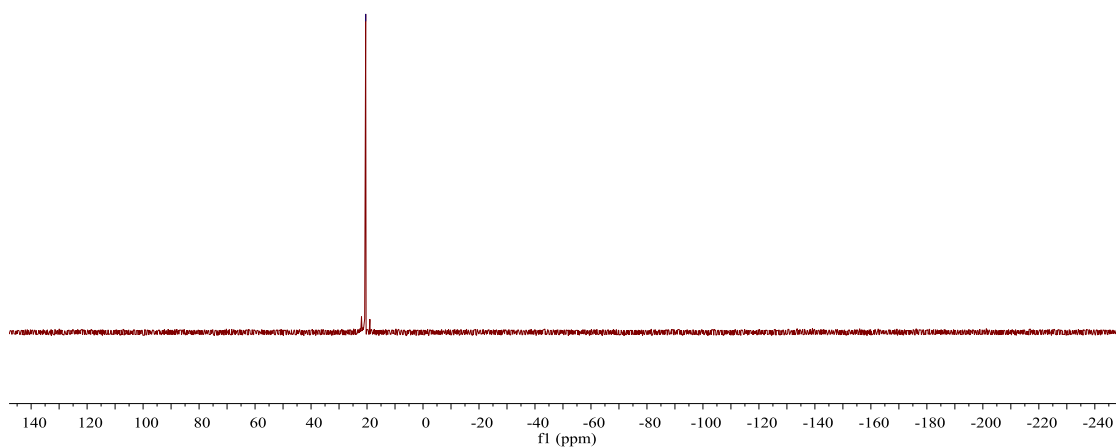

$^{31}\text{P}$  NMR (162 MHz,  $\text{CDCl}_3$ ) spectra of **10e**

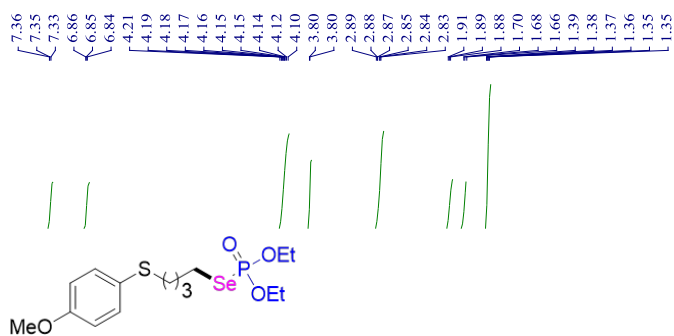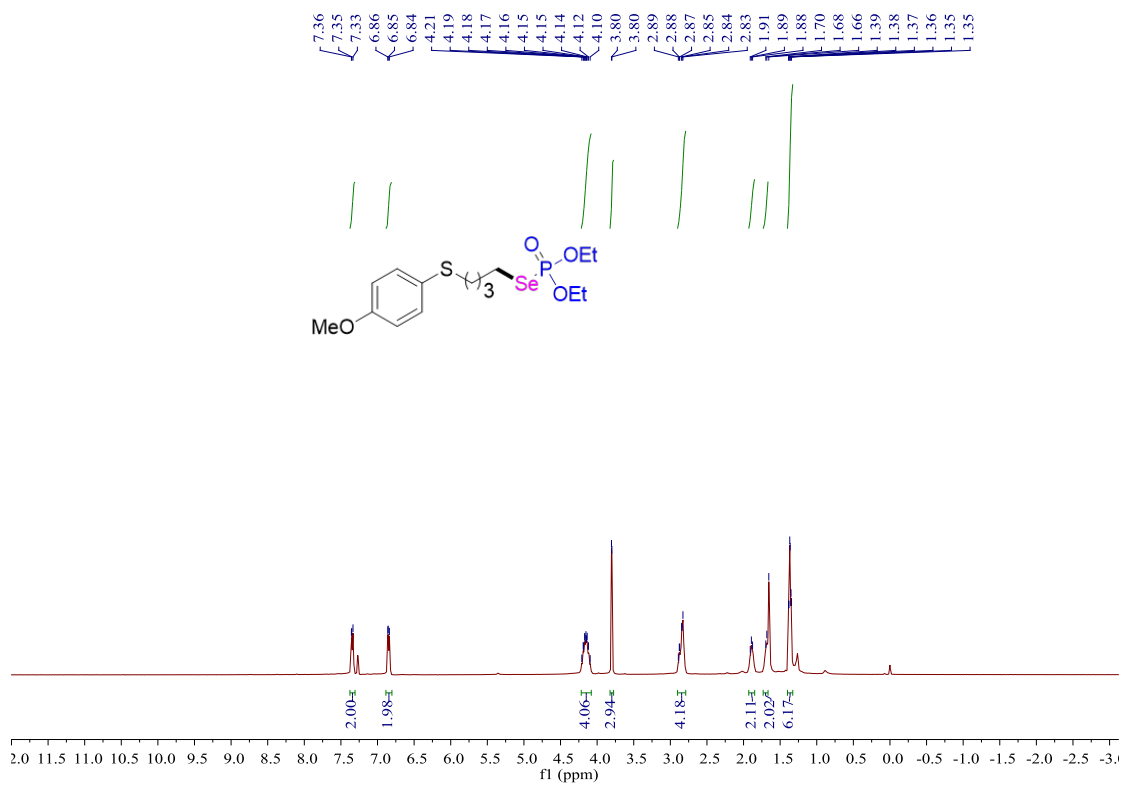

$^1\text{H}$  NMR (400 MHz,  $\text{CDCl}_3$ ) spectra of **10f**

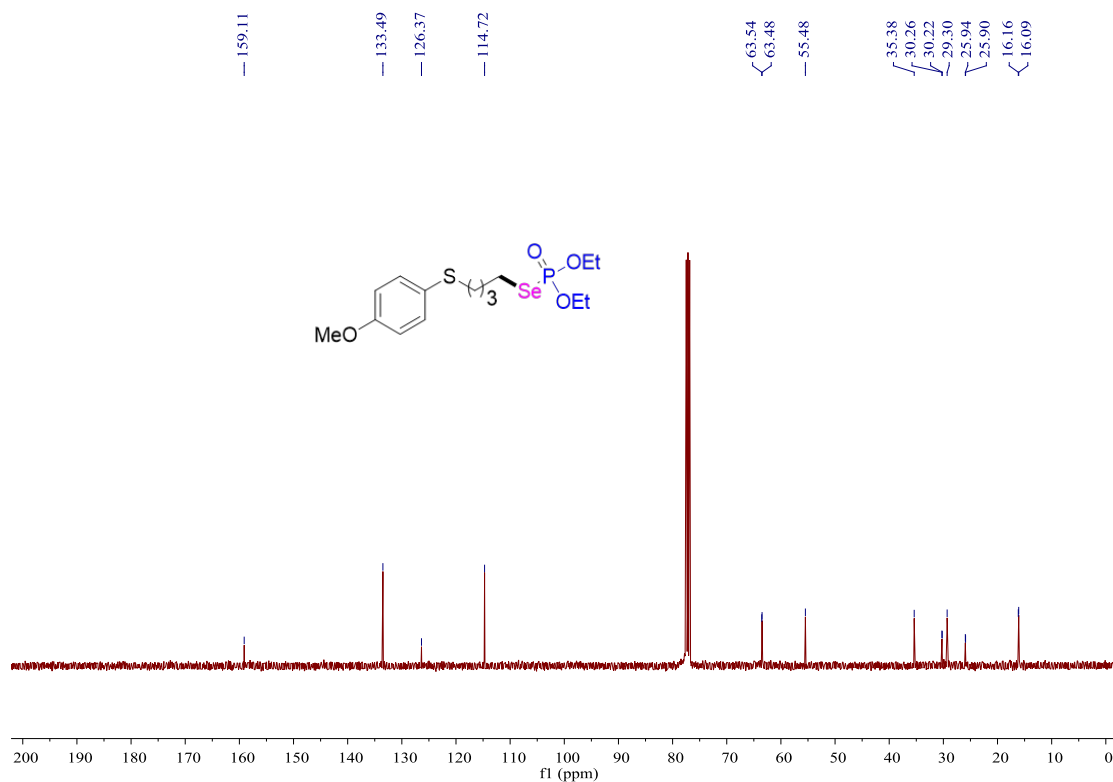

$^{13}\text{C}$  NMR (101 MHz,  $\text{CDCl}_3$ ) spectra of **10f**

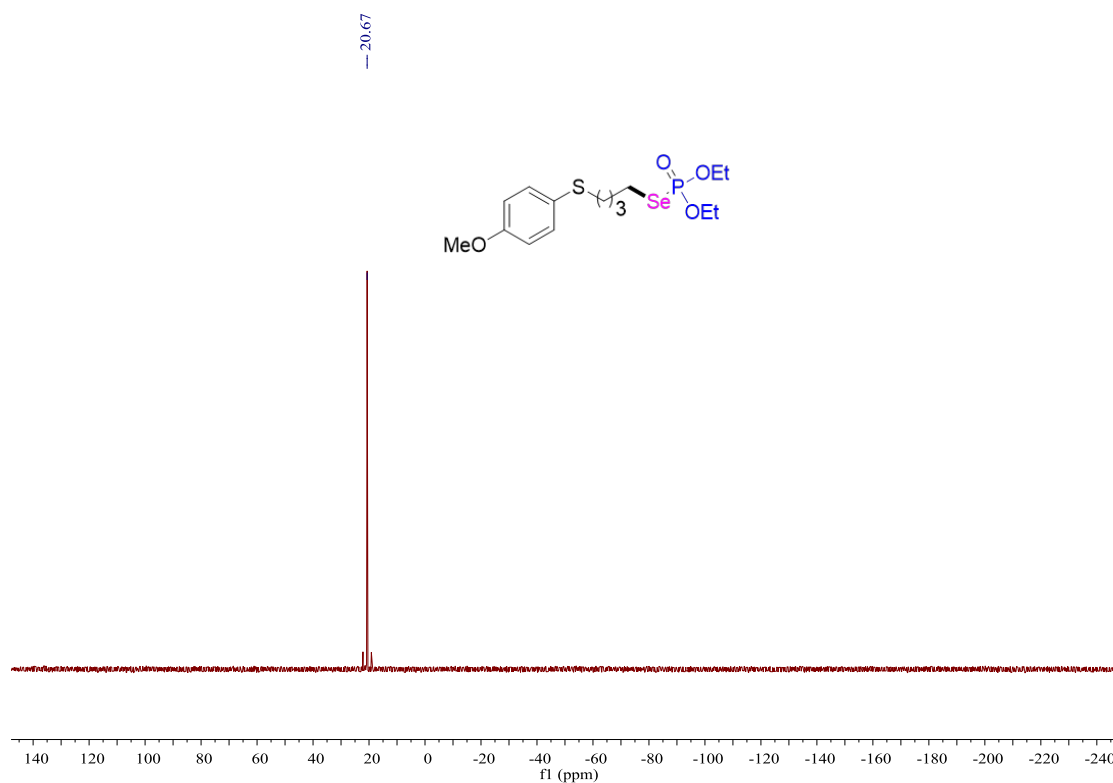

$^{31}\text{P}$  NMR (162 MHz,  $\text{CDCl}_3$ ) spectra of **10f**

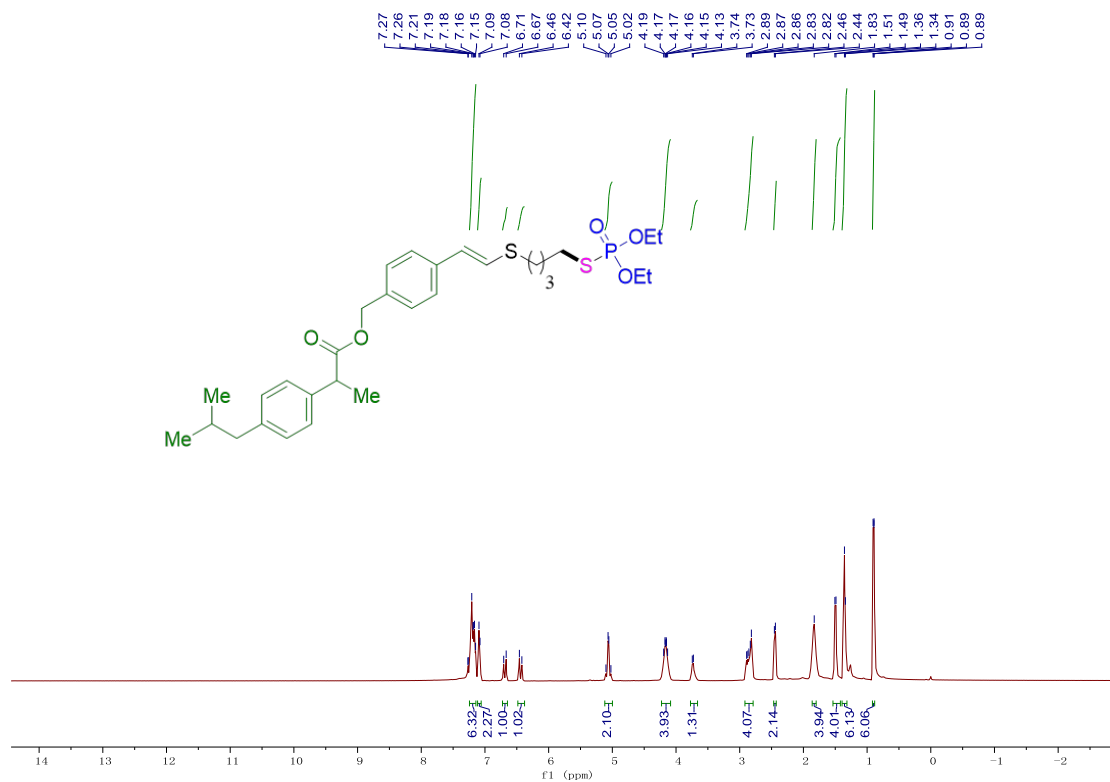

<sup>1</sup>H NMR (400 MHz, CDCl<sub>3</sub>) spectra of **3ra**

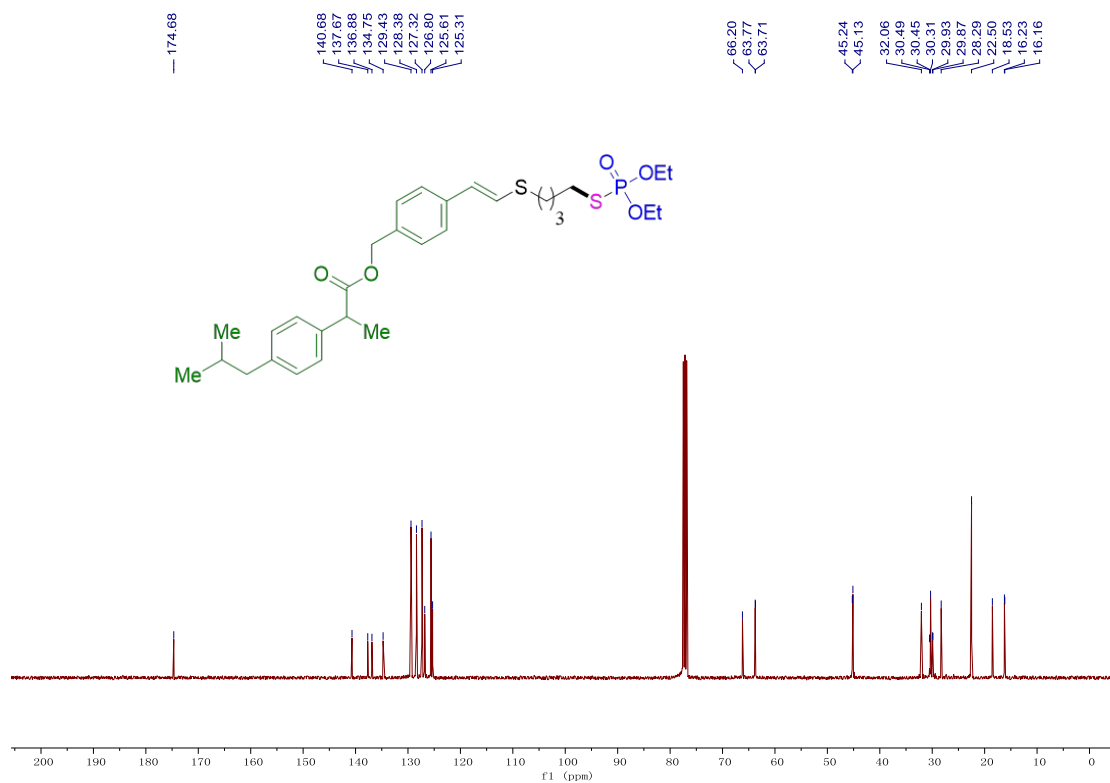

<sup>13</sup>C NMR (101 MHz, CDCl<sub>3</sub>) spectra of **3ra**

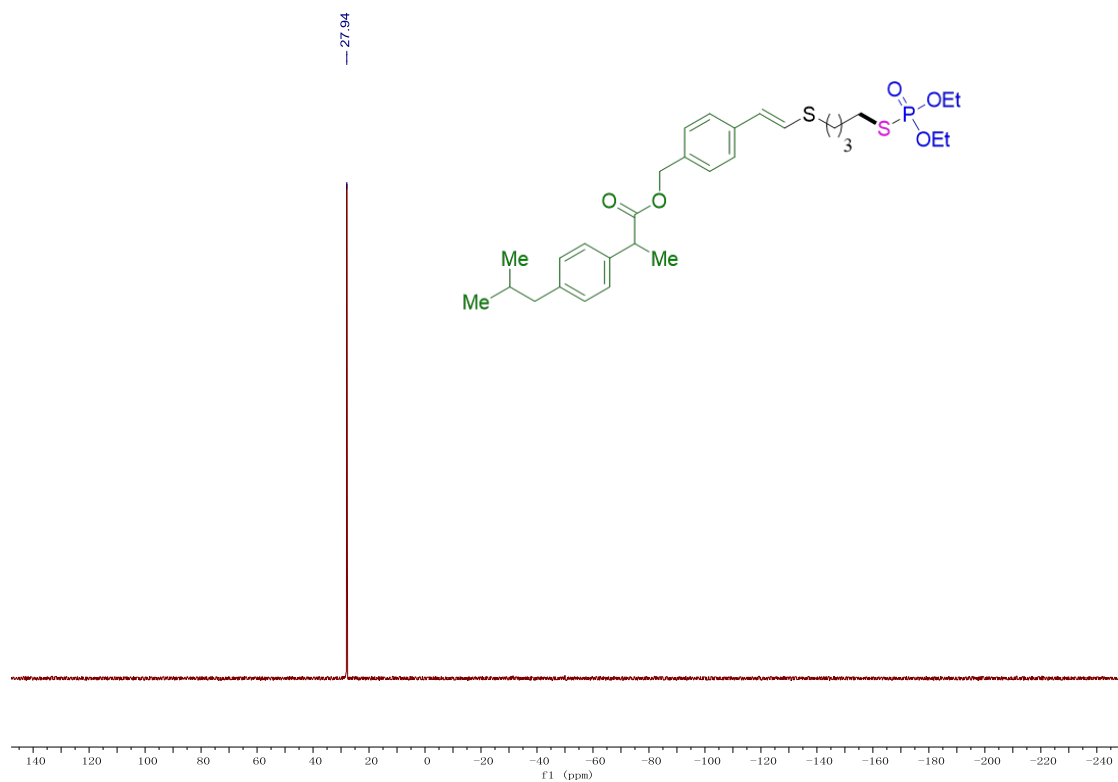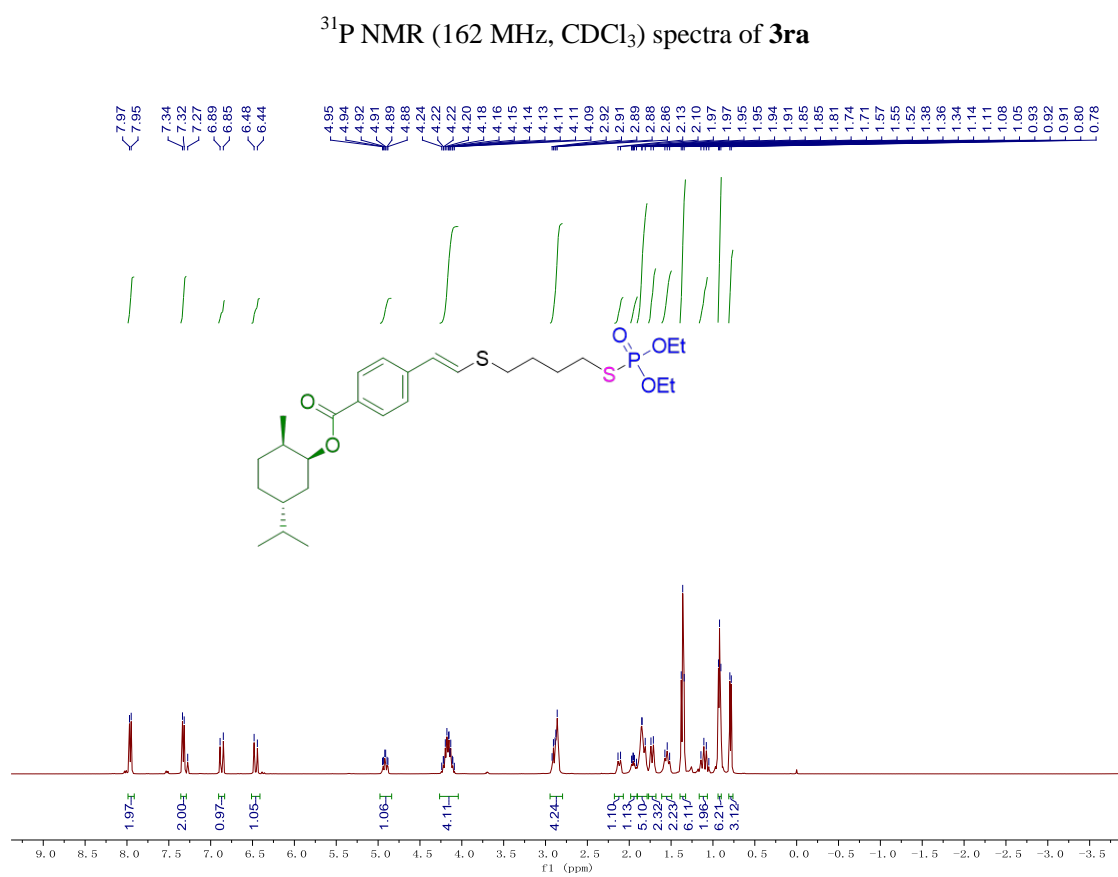



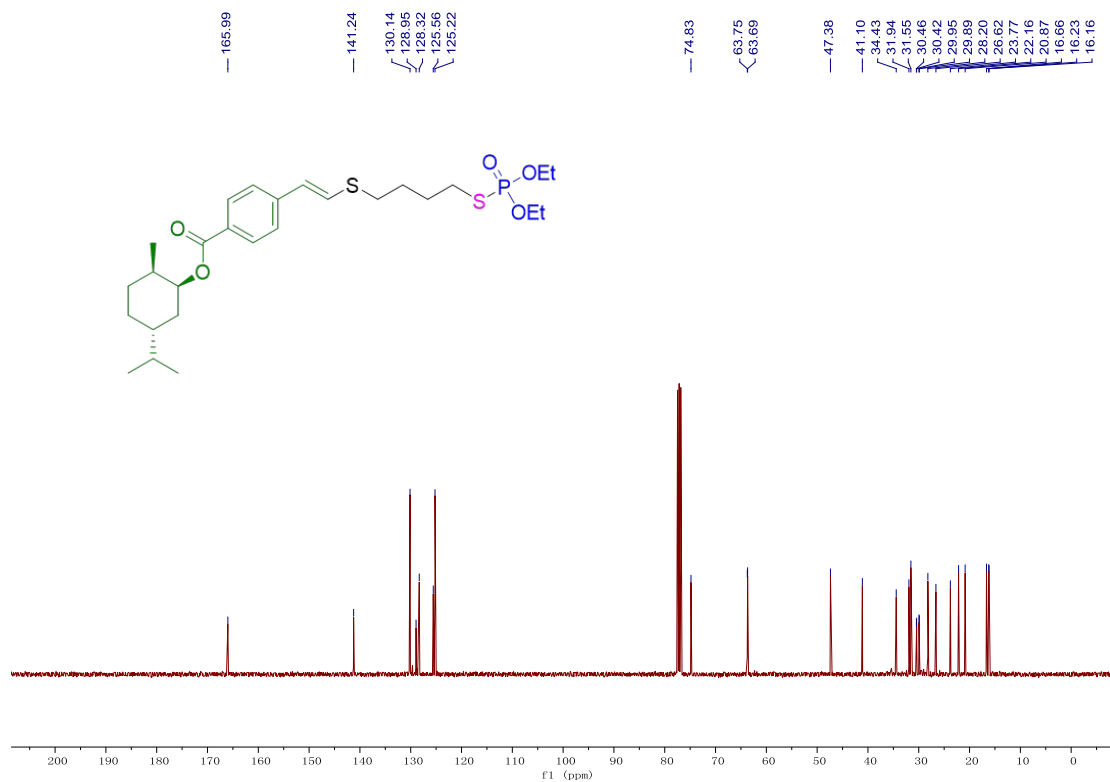

<sup>13</sup>C NMR (101 MHz, CDCl<sub>3</sub>) spectra of **3sa**

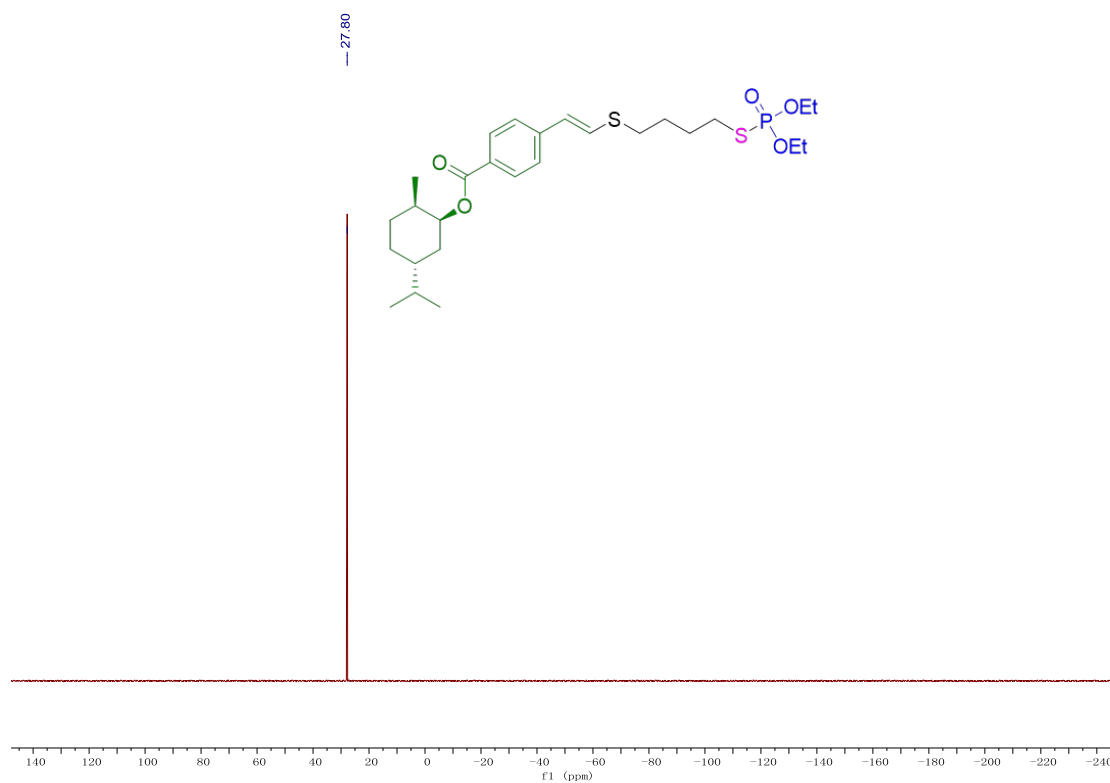

<sup>31</sup>P NMR (162 MHz, CDCl<sub>3</sub>) spectra of **3sa**

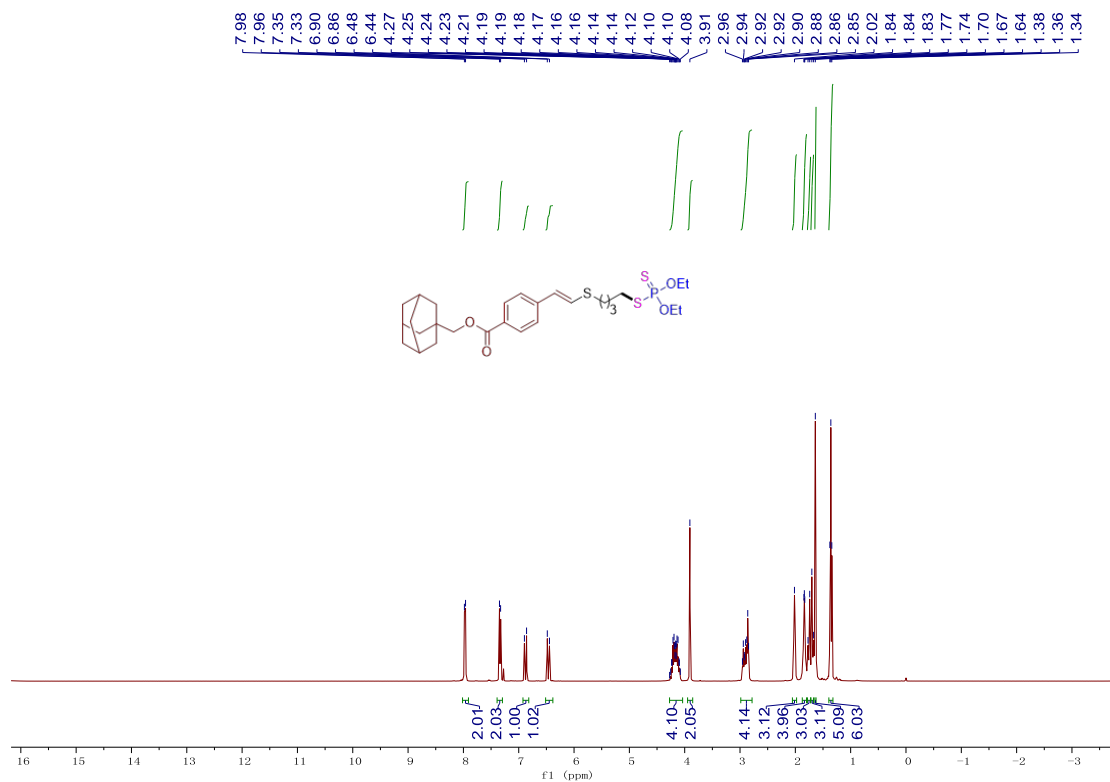

<sup>1</sup>H NMR (400 MHz, CDCl<sub>3</sub>) spectra of **9ab**

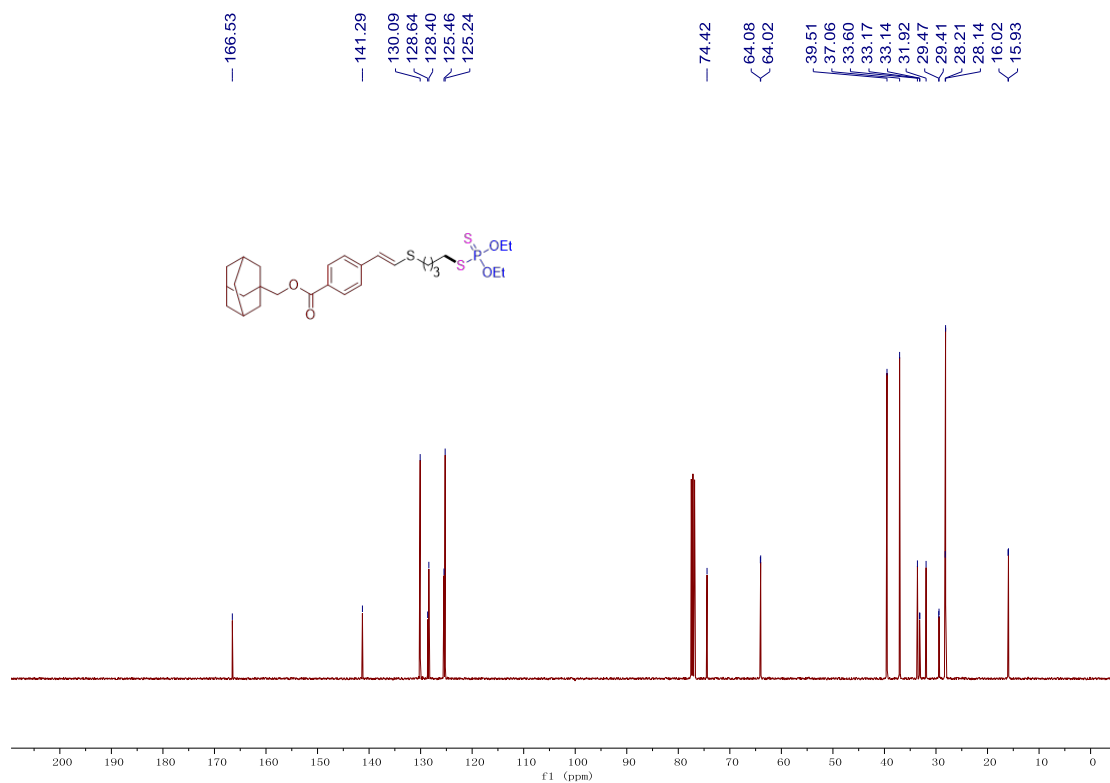

<sup>13</sup>C NMR (101 MHz, CDCl<sub>3</sub>) spectra of **9ab**

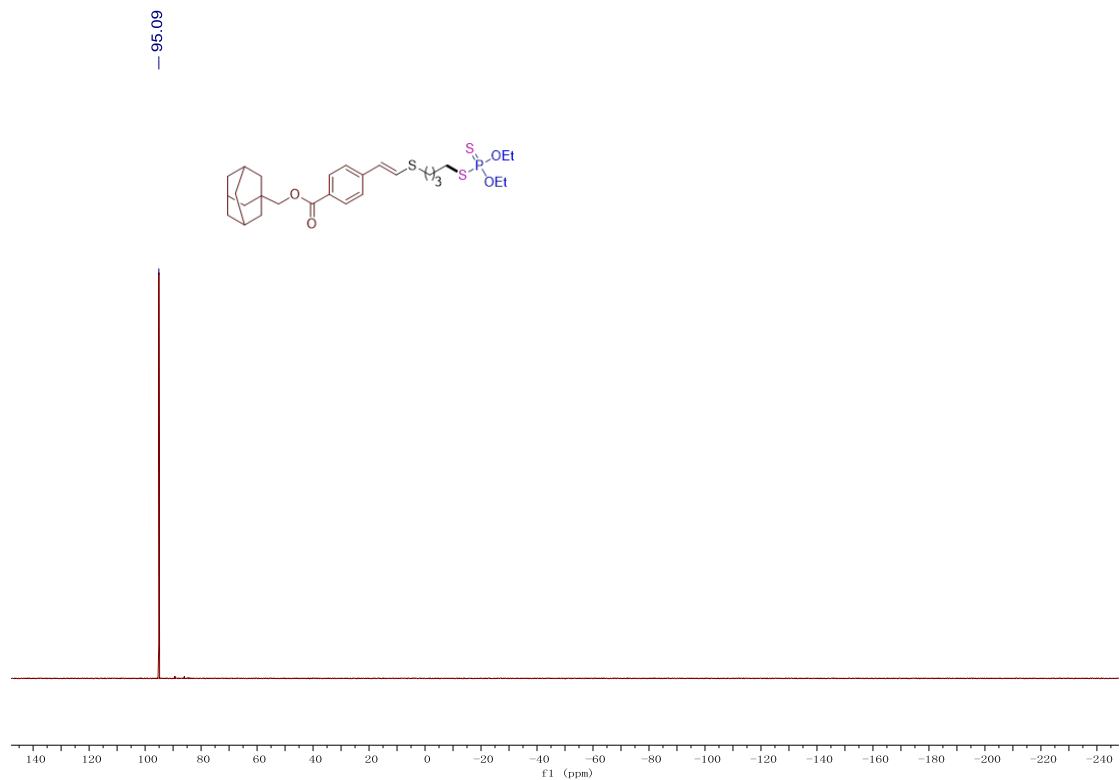

<sup>31</sup>P NMR (162 MHz, CDCl<sub>3</sub>) spectra of **9ab**

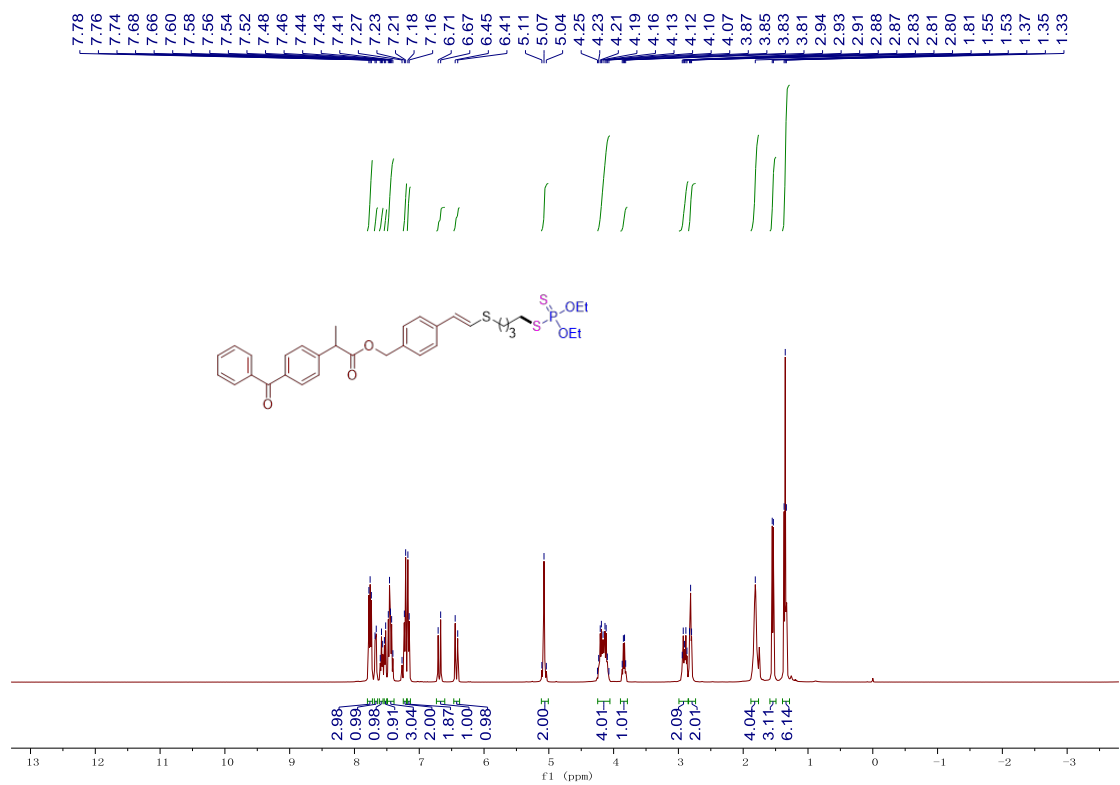

<sup>1</sup>H NMR (400 MHz, CDCl<sub>3</sub>) spectra of **9ac**

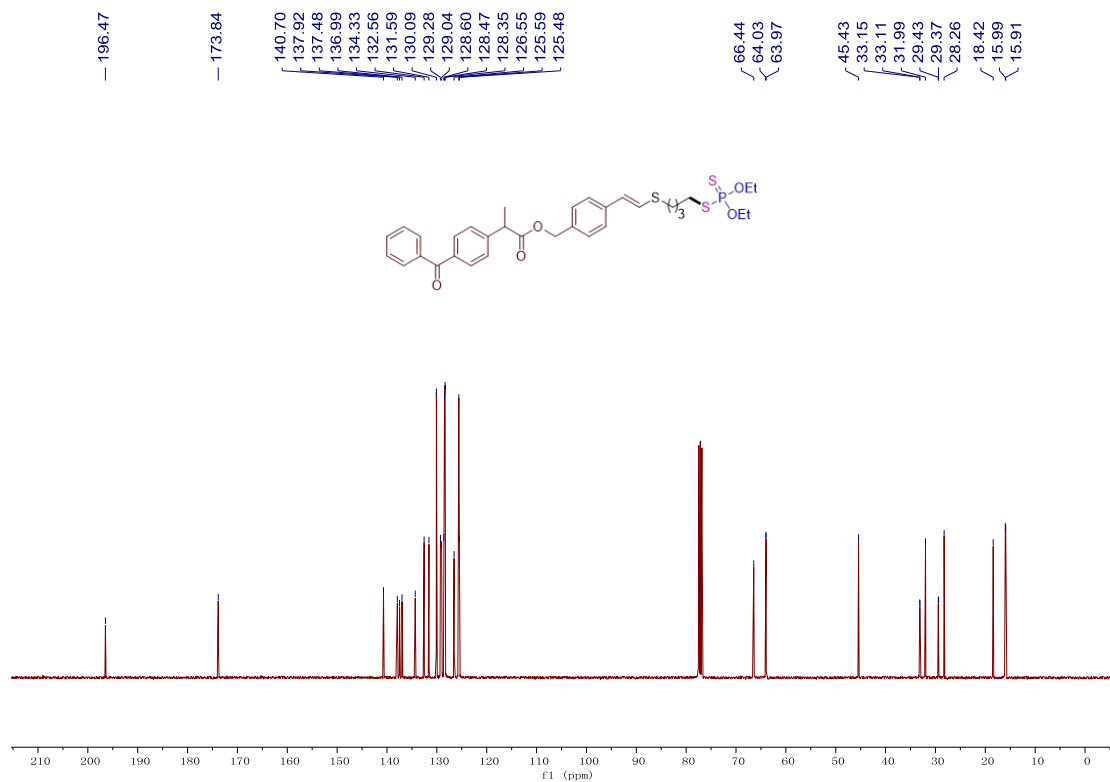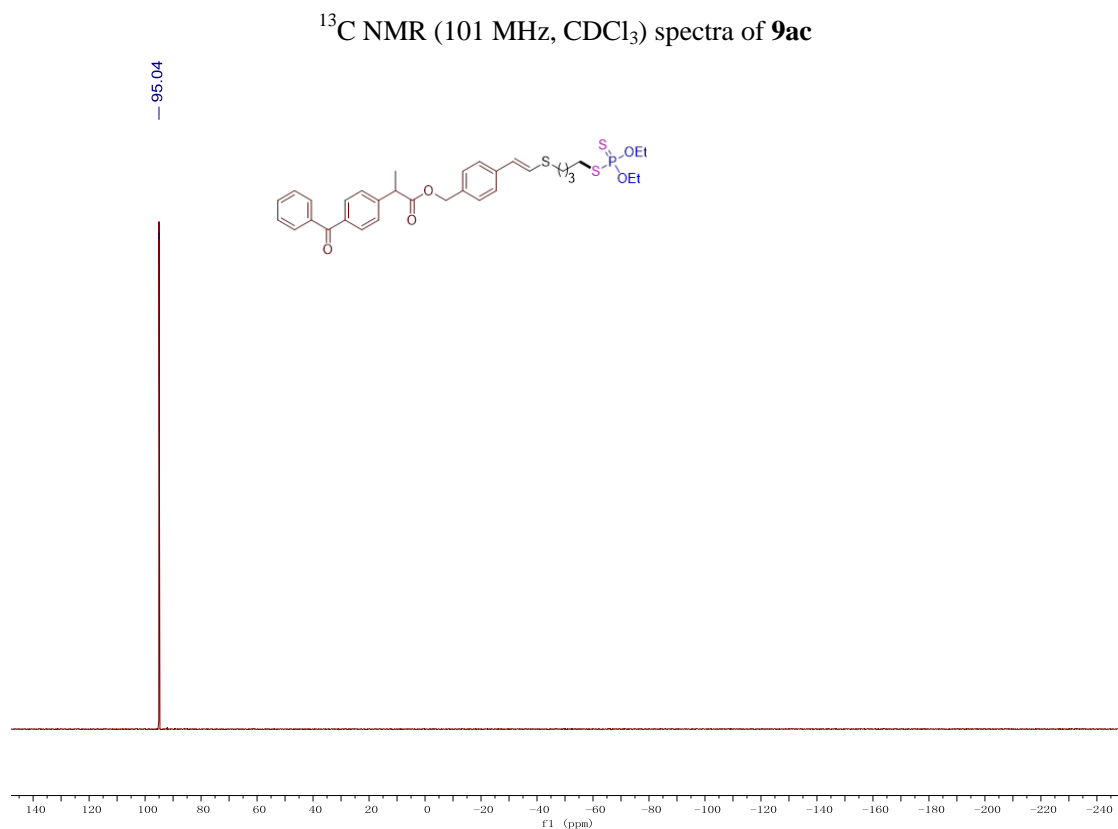

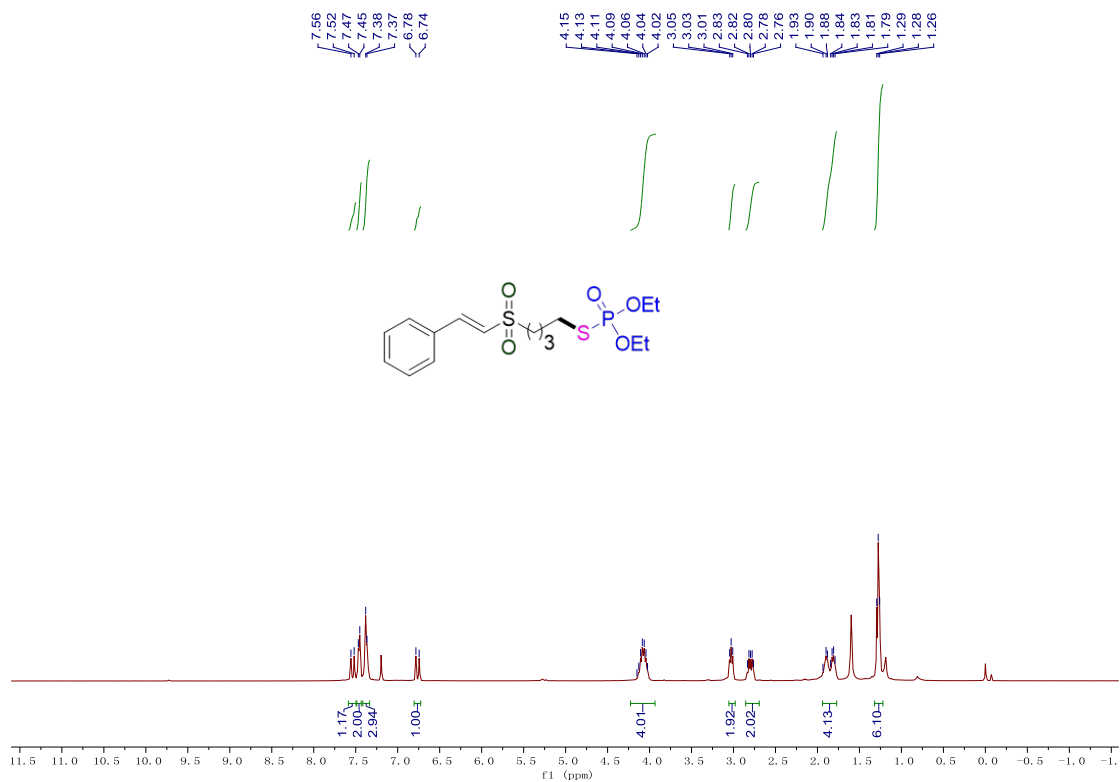

<sup>1</sup>H NMR (400 MHz, CDCl<sub>3</sub>) spectra of **11a**

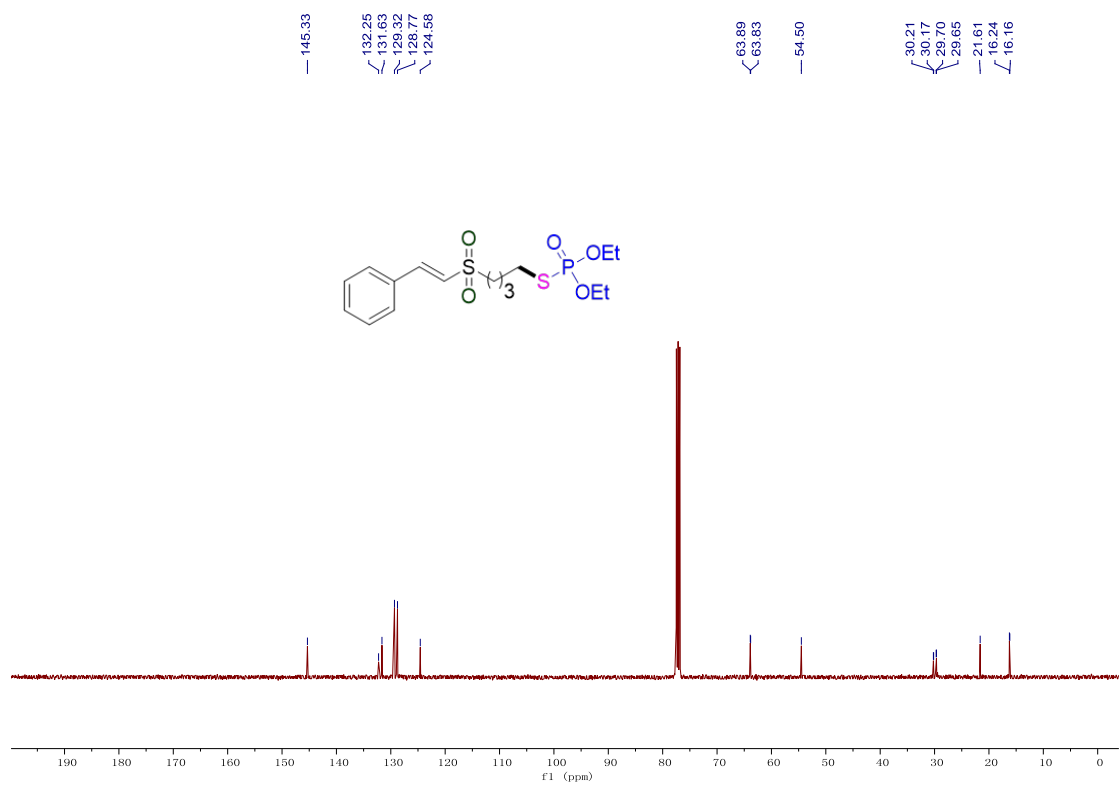

<sup>13</sup>C NMR (101 MHz, CDCl<sub>3</sub>) spectra of **11a**

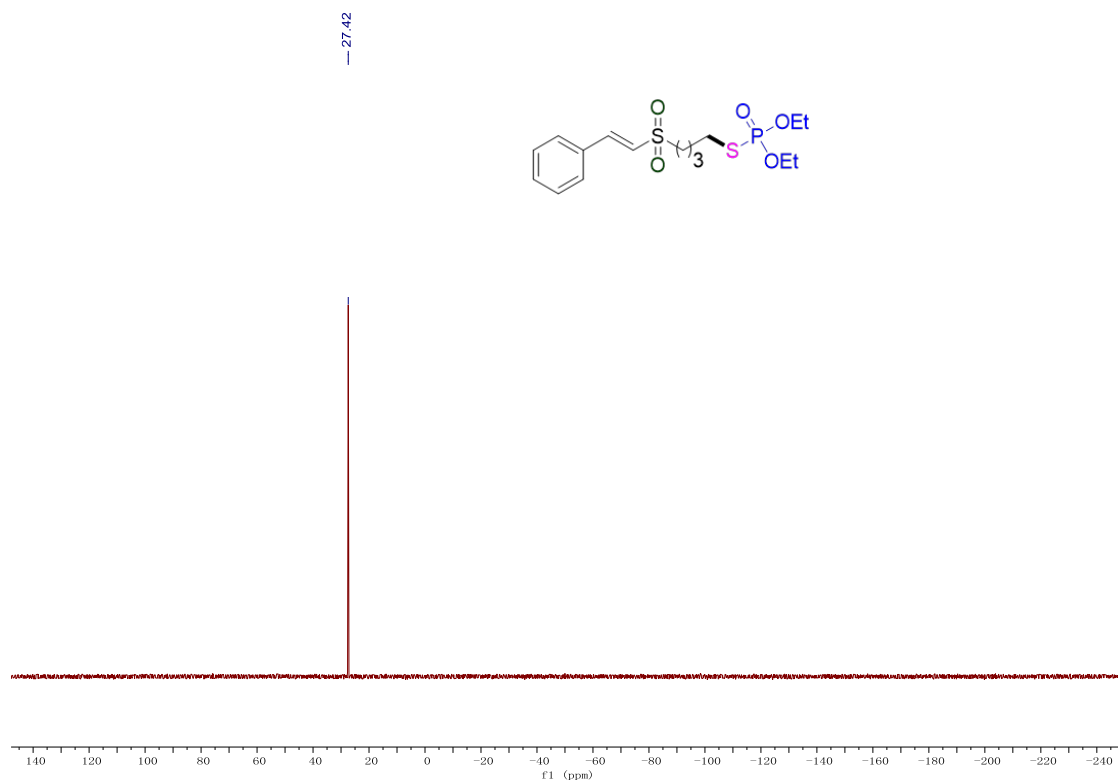

<sup>31</sup>P NMR (162 MHz, CDCl<sub>3</sub>) spectra of **11a**

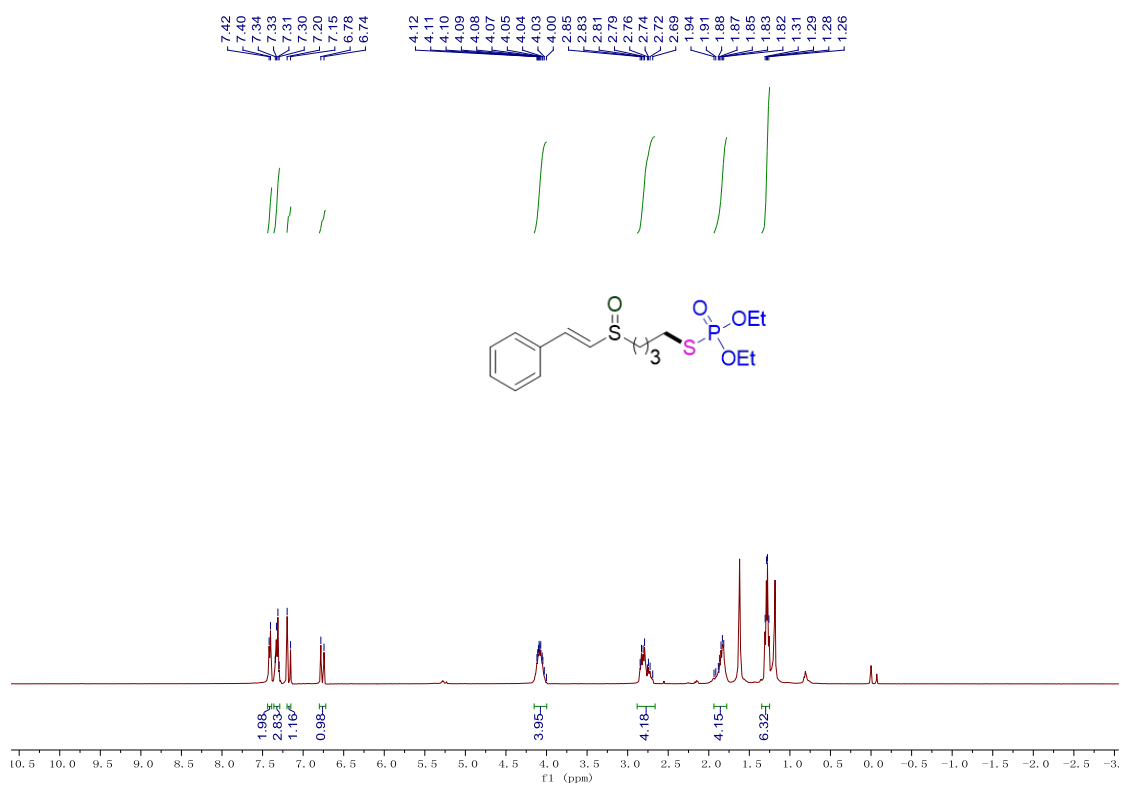

<sup>1</sup>H NMR (400 MHz, CDCl<sub>3</sub>) spectra of **11b**

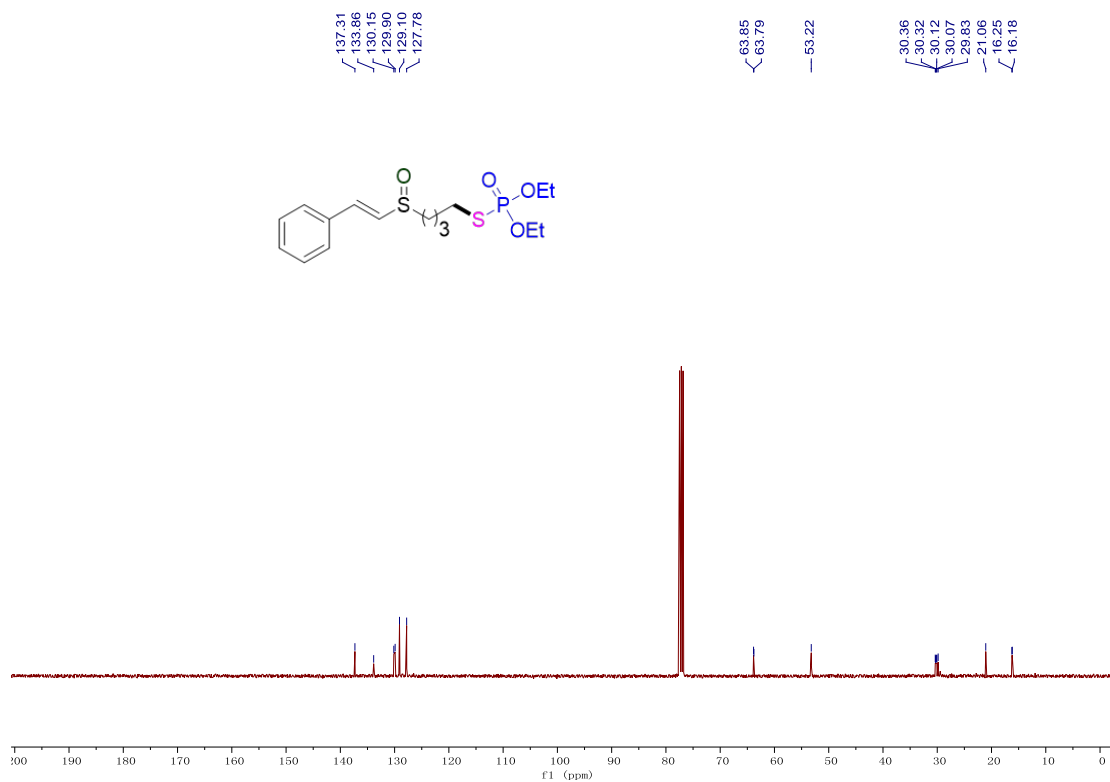

<sup>13</sup>C NMR (101 MHz, CDCl<sub>3</sub>) spectra of **11b**

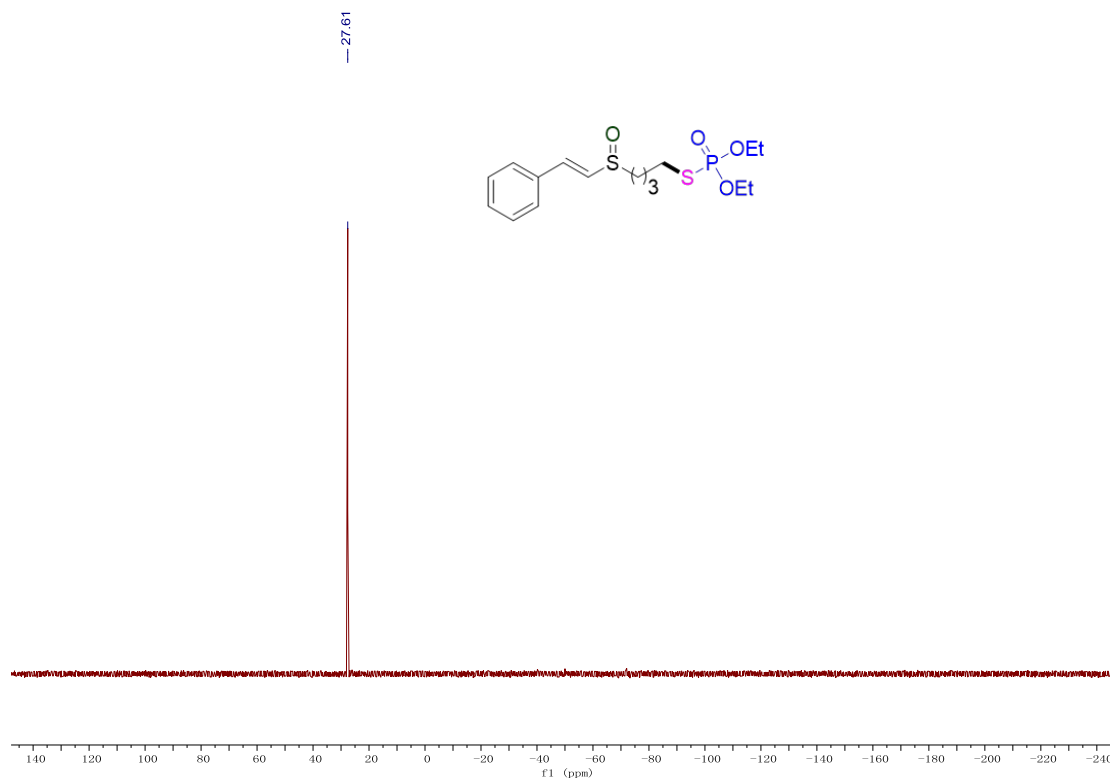

<sup>31</sup>P NMR (162 MHz, CDCl<sub>3</sub>) spectra of **11b**

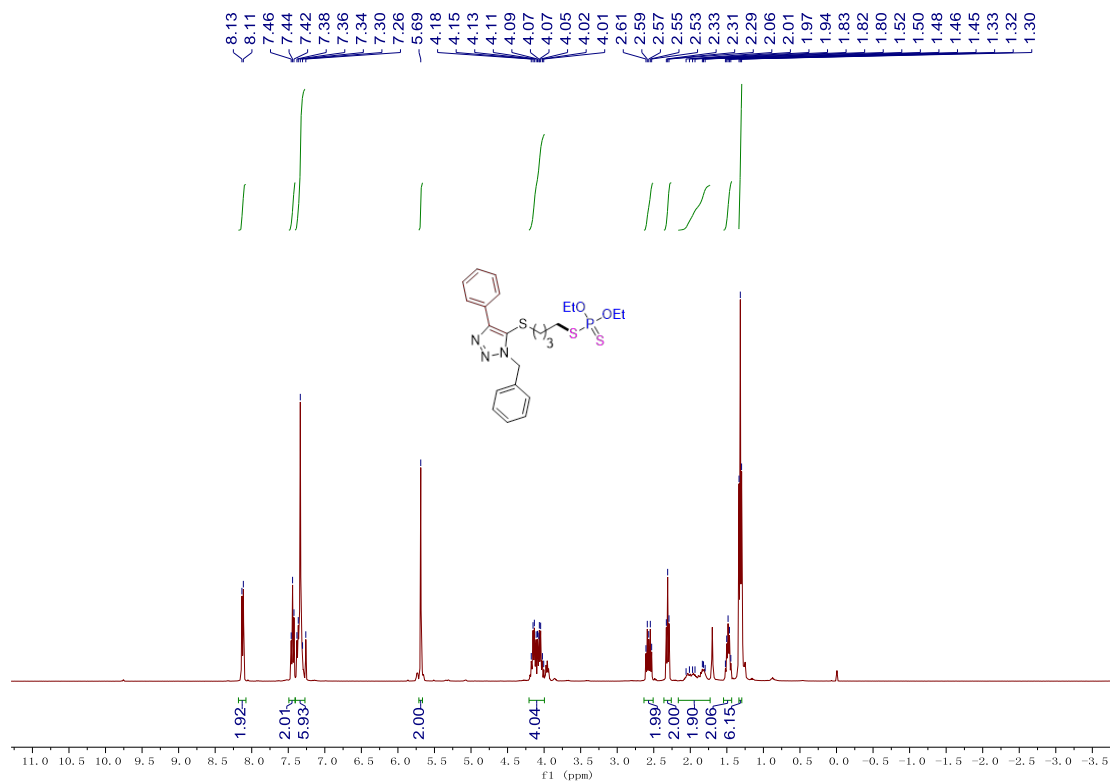

**<sup>1</sup>H NMR (400 MHz, CDCl<sub>3</sub>) spectra of **12a****

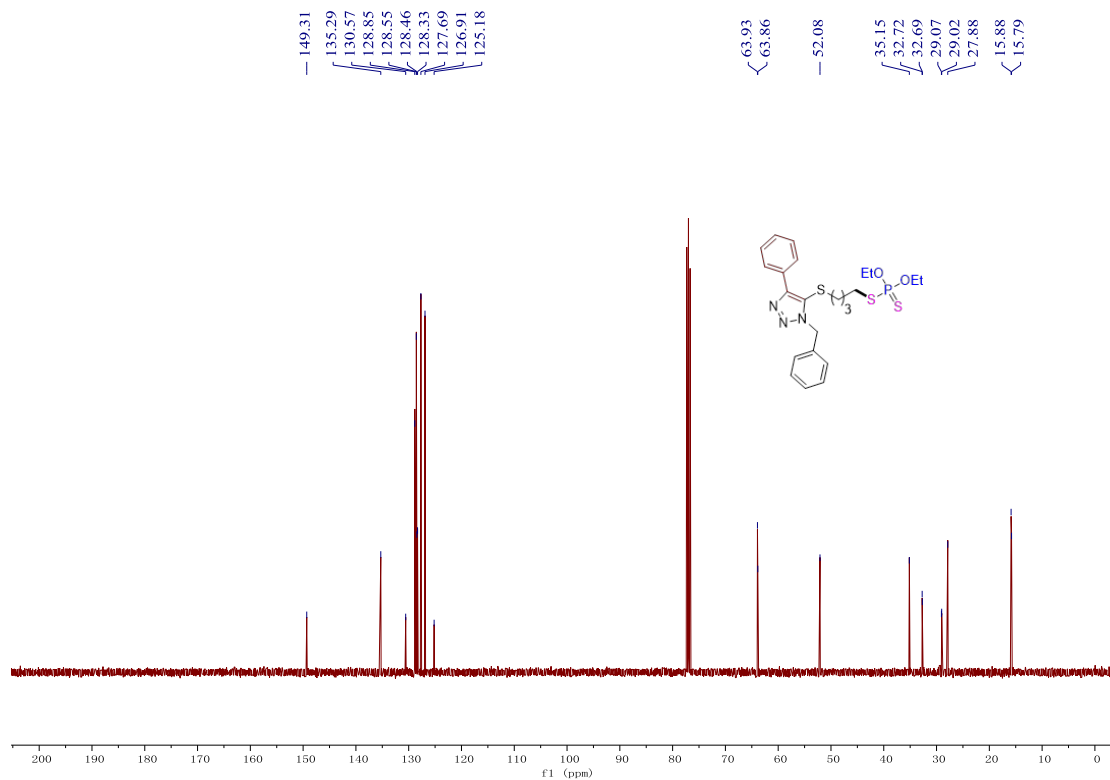

**<sup>13</sup>C NMR (101 MHz, CDCl<sub>3</sub>) spectra of **12a****



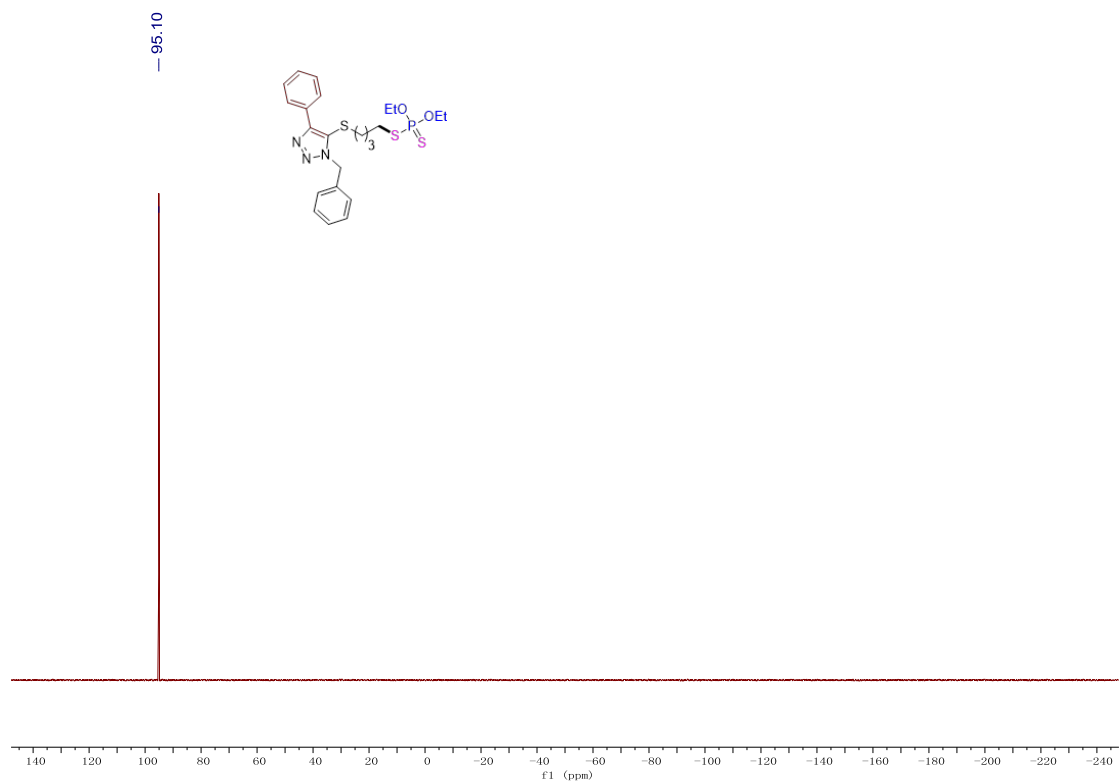

$^{31}\text{P}$  NMR (162 MHz,  $\text{CDCl}_3$ ) spectra of **12a**
